# Supplementary material for: Genomic Signatures of Strain Selection and Enhancement in Bacillus atrophaeus var. globigii, a Historical Biowarfare Simulant
Source: PLoS One. 2011 Mar 25;6(3):e17836. doi: 10.1371/journal.pone.0017836 (PMC3064580; doi:10.1371/journal.pone.0017836)
Supplement: Table S2 — details the scaffolding of large contigs of the de novo assembly of 454 data for the1942 strain based on optical maps. (XLSX) [file pone.0017836.s003.xlsx]

## Sheet: BG1942_ContigPlacement
Chromosome	Start	End	Contig	Start	End	Orientation
Bacillus globigii (1013-2) [NcoI]	1	4082890	Bacillus globigii (Vogel 3-7-42) [NcoI]	1	4150424	1
Bacillus globigii (Vogel 3-7-42) [NcoI]	1	4150424	Bacillus globigii (1013-2) [NcoI]	1	4082890	1
Bacillus globigii (Vogel 3-7-42) [NcoI]	5066	184880	contig_BGA00004 [NcoI] (in silico)	2109	186016	-1
Bacillus globigii (Vogel 3-7-42) [NcoI]	194996	298461	contig_BGA00023 [NcoI] (in silico)	4680	109683	1
Bacillus globigii (Vogel 3-7-42) [NcoI]	318820	421302	contig_BGA00019 [NcoI] (in silico)	15040	118372	1
Bacillus globigii (Vogel 3-7-42) [NcoI]	452394	1338148	contig_BGA00005 [NcoI] (in silico)	16426	906282	1
Bacillus globigii (Vogel 3-7-42) [NcoI]	1380319	1653899	contig_BGA00008 [NcoI] (in silico)	6134	275815	1
Bacillus globigii (Vogel 3-7-42) [NcoI]	1673260	2132803	contig_BGA00007 [NcoI] (in silico)	12211	472714	1
Bacillus globigii (Vogel 3-7-42) [NcoI]	2147026	2177599	contig_BGA00020 [NcoI] (in silico)	9761	42698	-1
Bacillus globigii (Vogel 3-7-42) [NcoI]	2205758	2289758	contig_BGA00017 [NcoI] (in silico)	17358	102950	1
Bacillus globigii (Vogel 3-7-42) [NcoI]	2308575	2485748	contig_BGA00026 [NcoI] (in silico)	5874	186059	1
Bacillus globigii (Vogel 3-7-42) [NcoI]	2494403	2555254	contig_BGA00018 [NcoI] (in silico)	680	62175	-1
Bacillus globigii (Vogel 3-7-42) [NcoI]	2555254	2745814	contig_BGA00015 [NcoI] (in silico)	1	191362	1
Bacillus globigii (Vogel 3-7-42) [NcoI]	2793560	2991295	contig_BGA00014 [NcoI] (in silico)	6334	203755	1
Bacillus globigii (Vogel 3-7-42) [NcoI]	3014979	3257201	contig_BGA00016 [NcoI] (in silico)	1562	244108	1
Bacillus globigii (Vogel 3-7-42) [NcoI]	3268765	3518476	contig_BGA00021 [NcoI] (in silico)	2263	253177	-1
Bacillus globigii (Vogel 3-7-42) [NcoI]	3525946	3539925	contig_BGA00013 [NcoI] (in silico)	302	14471	1
Bacillus globigii (Vogel 3-7-42) [NcoI]	3550617	3597772	contig_BGA00033 [NcoI] (in silico)	2117	50222	-1
Bacillus globigii (Vogel 3-7-42) [NcoI]	3621780	3670448	contig_BGA00003 [NcoI] (in silico)	73	48588	-1
Bacillus globigii (Vogel 3-7-42) [NcoI]	3675461	3734937	contig_BGA00025 [NcoI] (in silico)	3222	62678	-1
Bacillus globigii (Vogel 3-7-42) [NcoI]	3746688	3877726	contig_BGA00012 [NcoI] (in silico)	8207	143349	1
Bacillus globigii (Vogel 3-7-42) [NcoI]	3917416	4119216	contig_BGA00030 [NcoI] (in silico)	3459	206797	1
Bacillus globigii (Vogel 3-7-42) [NcoI]	4133187	4143966	contig_BGA00001 [NcoI] (in silico)	7299	19721	1
Unplaced contigs:
contig_BGA00002 [NcoI] (in silico)
contig_BGA00006 [NcoI] (in silico)
contig_BGA00009 [NcoI] (in silico)
contig_BGA00010 [NcoI] (in silico)
contig_BGA00011 [NcoI] (in silico)
contig_BGA00022 [NcoI] (in silico)
contig_BGA00024 [NcoI] (in silico)
contig_BGA00027 [NcoI] (in silico)
contig_BGA00028 [NcoI] (in silico)
contig_BGA00029 [NcoI] (in silico)
contig_BGA00031 [NcoI] (in silico)
contig_BGA00032 [NcoI] (in silico)
contig_BGA00034 [NcoI] (in silico)
contig_BGA00035 [NcoI] (in silico)
contig_BGA00036 [NcoI] (in silico)
