# Supplementary material for: Genomic Signatures of Strain Selection and Enhancement in Bacillus atrophaeus var. globigii, a Historical Biowarfare Simulant
Source: PLoS One. 2011 Mar 25;6(3):e17836. doi: 10.1371/journal.pone.0017836 (PMC3064580; doi:10.1371/journal.pone.0017836)
Supplement: Table S3 — contains RAST annotation files (.gtf format) of the 1942 strain and indicates the location of the large deletions in ATCC 9372-1 and 1013-2. (XLSX) [file pone.0017836.s004.xlsx]

## Sheet: tableS3
Table S3: RAST Annotation of Bacillus atrophaeus 1942
Feature ID	Type	Contig	Start	Stop	Frame	Strand	Length (bp)	Function	Subsystem
fig|720555.3.peg.1	CDS	Contig8	84	236	3	+	153	hypothetical protein	- none -
fig|720555.3.peg.2	CDS	Contig8	1230	2636	3	+	1407	FtsK/SpoIIIE family protein	- none -
fig|720555.3.peg.3	CDS	Contig8	2646	3704	3	+	1059	Transcriptional regulator, Cro/CI family	- none -
fig|720555.3.peg.4	CDS	Contig8	3968	4240	2	+	273	hypothetical protein	- none -
fig|720555.3.peg.5	CDS	Contig8	5123	5389	2	+	267	Uncharacterized protein ydcT	- none -
fig|720555.3.peg.6	CDS	Contig8	5701	6459	1	+	759	hypothetical protein	- none -
fig|720555.3.peg.7	CDS	Contig8	7173	7361	3	+	189	unknown	- none -
fig|720555.3.peg.8	CDS	Contig8	7379	7528	2	+	150	hypothetical protein	- none -
fig|720555.3.peg.9	CDS	Contig8	7556	8620	2	+	1065	YDDB protein	- none -
fig|720555.3.peg.10	CDS	Contig8	8632	8880	1	+	249	unknown	- none -
fig|720555.3.peg.11	CDS	Contig8	8893	9417	1	+	525	unknown	- none -
fig|720555.3.peg.12	CDS	Contig8	9407	11800	2	+	2394	conjugal transfer protein, putative	- none -
fig|720555.3.peg.13	CDS	Contig8	11818	12033	1	+	216	Uncharacterized protein yddF	- none -
fig|720555.3.peg.14	CDS	Contig8	12157	14592	1	+	2436	unknown	- none -
fig|720555.3.peg.15	CDS	Contig8	15219	14626	-3	-	594	hypothetical protein	- none -
fig|720555.3.peg.16	CDS	Contig8	15327	16289	3	+	963	hypothetical protein	- none -
fig|720555.3.peg.17	CDS	Contig8	16304	16807	2	+	504	Uncharacterized protein yddI	- none -
fig|720555.3.peg.18	CDS	Contig8	16872	17255	3	+	384	hypothetical protein	- none -
fig|720555.3.peg.19	CDS	Contig8	17473	18591	1	+	1119	hypothetical protein	- none -
fig|720555.3.peg.20	CDS	Contig8	18851	20026	2	+	1176	response regulator aspartate phosphatase	- none -
fig|720555.3.peg.21	CDS	Contig8	20962	21138	1	+	177	DNA polymerase III epsilon subunit (EC 2.7.7.7)	- none -
fig|720555.3.peg.22	CDS	Contig8	22599	21571	-3	-	1029	Delta5 acyl-lipid desaturase (EC 1.14.99.-)	- none -
fig|720555.3.peg.23	CDS	Contig8	23432	23635	2	+	204	Cold shock protein CspA	Cold shock, CspA family of proteins
fig|720555.3.peg.24	CDS	Contig8	24958	24497	-1	-	462	CarD-like transcriptional regulator	- none -
fig|720555.3.peg.25	CDS	Contig8	25607	26266	2	+	660	Transcriptional regulator, GntR family	- none -
fig|720555.3.peg.26	CDS	Contig8	26253	27245	3	+	993	membrane protein, putative	- none -
fig|720555.3.peg.27	CDS	Contig8	27477	27352	-3	-	126	hypothetical protein	- none -
fig|720555.3.peg.28	CDS	Contig8	28731	28492	-3	-	240	Unnamed hypothetical gene product in the file!!	- none -
fig|720555.3.peg.29	CDS	Contig8	29639	28995	-2	-	645	membrane protein, putative	- none -
fig|720555.3.peg.30	CDS	Contig8	29756	30208	2	+	453	Transcriptional regulator, MarR family	- none -
fig|720555.3.peg.31	CDS	Contig8	30227	30751	2	+	525	negative regulation of sporulation, septation and degradative enzyme genes (aprE, nprE, phoA, sacB)	- none -
fig|720555.3.peg.32	CDS	Contig8	30775	31392	1	+	618	protease synthase and sporulation negative regulatory protein PAI 2	- none -
fig|720555.3.peg.33	CDS	Contig8	31961	31791	-2	-	171	hypothetical protein	- none -
fig|720555.3.peg.34	CDS	Contig8	32122	32241	1	+	120	hypothetical protein	- none -
fig|720555.3.peg.35	CDS	Contig8	33776	32394	-2	-	1383	Transcriptional regulator, GntR family / Aspartate aminotransferase (EC 2.6.1.1)	Proline, 4-hydroxyproline uptake and utilization; <br>Methionine Salvage; <br>Threonine and Homoserine Biosynthesis; <br>Glutamine, Glutamate, Aspartate and Asparagine Biosynthesis
fig|720555.3.peg.36	CDS	Contig8	33890	34666	2	+	777	Phenazine biosynthesis protein PhzF	- none -
fig|720555.3.peg.37	CDS	Contig8	36300	35098	-3	-	1203	Multidrug resistance protein B	- none -
fig|720555.3.peg.38	CDS	Contig8	36568	36455	-1	-	114	hypothetical protein	- none -
fig|720555.3.peg.39	CDS	Contig8	37222	37326	1	+	105	hypothetical protein	- none -
fig|720555.3.peg.40	CDS	Contig8	38599	37736	-1	-	864	Permease of the drug/metabolite transporter (DMT) superfamily	Cobalt-zinc-cadmium resistance; <br>Queuosine-Archaeosine Biosynthesis
fig|720555.3.peg.41	CDS	Contig8	38764	40161	1	+	1398	Predicted transcriptional regulator of pyridoxine metabolism	Pyridoxin (Vitamin B6) Biosynthesis
fig|720555.3.peg.42	CDS	Contig8	40442	41314	2	+	873	membrane protein, putative	- none -
fig|720555.3.peg.43	CDS	Contig8	41928	42275	3	+	348	Arsenical resistance operon repressor	Arsenic resistance
fig|720555.3.peg.44	CDS	Contig8	42287	43585	2	+	1299	Arsenic efflux pump protein	Arsenic resistance
fig|720555.3.peg.45	CDS	Contig8	43610	44029	2	+	420	Arsenate reductase (EC 1.20.4.1)	CBSS-315749.4.peg.3658; <br>Anaerobic respiratory reductases; <br>Arsenic resistance
fig|720555.3.peg.46	CDS	Contig8	44498	45139	2	+	642	hypothetical protein	- none -
fig|720555.3.peg.47	CDS	Contig8	47067	45589	-3	-	1479	Na+/solute symporter	- none -
fig|720555.3.peg.48	CDS	Contig8	47180	47064	-2	-	117	hypothetical protein	- none -
fig|720555.3.peg.49	CDS	Contig8	47927	48382	2	+	456	hypothetical protein	- none -
fig|720555.3.peg.50	CDS	Contig8	48379	51036	1	+	2658	Putative membrane protein ydgH	- none -
fig|720555.3.peg.51	CDS	Contig8	51273	53216	3	+	1944	Activator of the mannose operon (transcriptional antiterminator), BglG family	Mannose Metabolism
fig|720555.3.peg.52	CDS	Contig8	53365	55302	1	+	1938	PTS system, mannose-specific IIB component (EC 2.7.1.69) / PTS system, mannose-specific IIC component (EC 2.7.1.69) / PTS system, mannose-specific IIA component (EC 2.7.1.69)	Sialic Acid Metabolism; <br>Sialic Acid Metabolism; <br>Sialic Acid Metabolism; <br>Mannose Metabolism; <br>Mannose Metabolism; <br>Mannose Metabolism
fig|720555.3.peg.53	CDS	Contig8	55320	56264	3	+	945	Mannose-6-phosphate isomerase (EC 5.3.1.8)	Mannose Metabolism
fig|720555.3.peg.54	CDS	Contig8	57650	56751	-2	-	900	Permease of the drug/metabolite transporter (DMT) superfamily	Cobalt-zinc-cadmium resistance; <br>Queuosine-Archaeosine Biosynthesis
fig|720555.3.peg.55	CDS	Contig8	57783	59231	3	+	1449	Transcriptional regulator, GntR family / Aspartate aminotransferase (EC 2.6.1.1)	Proline, 4-hydroxyproline uptake and utilization; <br>Methionine Salvage; <br>Threonine and Homoserine Biosynthesis; <br>Glutamine, Glutamate, Aspartate and Asparagine Biosynthesis
fig|720555.3.peg.56	CDS	Contig8	59450	60223	2	+	774	Transcriptional regulator, TetR family	- none -
fig|720555.3.peg.57	CDS	Contig8	61071	60310	-3	-	762	hypothetical protein	- none -
fig|720555.3.peg.58	CDS	Contig8	61364	61786	2	+	423	HTH-type transcriptional regulator LrpA	- none -
fig|720555.3.peg.59	CDS	Contig8	61876	62073	1	+	198	hypothetical protein	- none -
fig|720555.3.peg.60	CDS	Contig8	63961	62327	-1	-	1635	ABC transporter, ATP-binding protein, putative	- none -
fig|720555.3.peg.61	CDS	Contig8	64573	65007	1	+	435	hypothetical protein	- none -
fig|720555.3.peg.62	CDS	Contig8	65358	65074	-3	-	285	hypothetical protein	- none -
fig|720555.3.peg.63	CDS	Contig8	66377	65757	-2	-	621	hypothetical protein	- none -
fig|720555.3.peg.64	CDS	Contig8	66552	66418	-3	-	135	hypothetical protein	- none -
fig|720555.3.peg.65	CDS	Contig8	66775	66894	1	+	120	Ribonucleotide reductase of class II (coenzyme B12-dependent) (EC 1.17.4.1) @ intein-containing	Inteins; <br>Ribonucleotide reduction
fig|720555.3.peg.66	CDS	Contig8	67027	67833	1	+	807	Probable beta-lactamase ybxI precursor (EC 3.5.2.6)	Beta-lactamase
fig|720555.3.peg.67	CDS	Contig8	68415	67945	-3	-	471	hypothetical protein	- none -
fig|720555.3.peg.68	CDS	Contig8	68587	69804	1	+	1218	Bicyclomycin resistance protein	- none -
fig|720555.3.peg.69	CDS	Contig8	70328	71539	2	+	1212	Glycerol dehydrogenase (EC 1.1.1.6)	Respiratory dehydrogenases 1; <br>Glycerol fermenation to 1,3-propanediol; <br>Glycerol and Glycerol-3-phosphate Uptake and Utilization
fig|720555.3.peg.70	CDS	Contig8	71747	73012	2	+	1266	Spore protein YdhD, not involved in spore germination	Spore germination
fig|720555.3.peg.71	CDS	Contig8	73288	74472	1	+	1185	glycosyl transferase, putative	- none -
fig|720555.3.peg.72	CDS	Contig8	74617	74453	-1	-	165	hypothetical protein	- none -
fig|720555.3.peg.73	CDS	Contig8	74751	76391	3	+	1641	Flagellar hook-length control protein FliK	- none -
fig|720555.3.peg.74	CDS	Contig8	77522	76815	-2	-	708	Uncharacterized protein ydhF precursor	- none -
fig|720555.3.peg.75	CDS	Contig8	78990	77602	-3	-	1389	Alkaline phosphatase (EC 3.1.3.1)	Phosphate metabolism
fig|720555.3.peg.76	CDS	Contig8	79293	79808	3	+	516	hypothetical protein	- none -
fig|720555.3.peg.77	CDS	Contig8	80190	81551	3	+	1362	D-alanyl-D-alanine carboxypeptidase (EC 3.4.16.4)	Peptidoglycan Biosynthesis; <br>Murein Hydrolases
fig|720555.3.peg.78	CDS	Contig8	81852	82814	3	+	963	Glycine betaine ABC transport system, ATP-binding protein OpuAA (EC 3.6.3.32)	Choline and Betaine Uptake and Betaine Biosynthesis
fig|720555.3.peg.79	CDS	Contig8	82849	84330	1	+	1482	Glycine betaine ABC transport system, permease protein OpuAB / Glycine betaine ABC transport system, glycine betaine-binding protein OpuAC	Choline and Betaine Uptake and Betaine Biosynthesis; <br>Choline and Betaine Uptake and Betaine Biosynthesis
fig|720555.3.peg.80	CDS	Contig8	87166	84746	-1	-	2421	hypothetical protein	- none -
fig|720555.3.peg.81	CDS	Contig8	87938	87393	-2	-	546	Ribosomal-protein-L7p-serine acetyltransferase	Ribosome biogenesis bacterial; <br>Ribosomal protein S5p acylation
fig|720555.3.peg.82	CDS	Contig8	88105	88560	1	+	456	Transcriptional regulator, MarR family	- none -
fig|720555.3.peg.83	CDS	Contig8	88580	88993	2	+	414	hypothetical protein	- none -
fig|720555.3.peg.84	CDS	Contig8	90213	89056	-3	-	1158	hypothetical protein	- none -
fig|720555.3.peg.85	CDS	Contig8	90464	90342	-2	-	123	hypothetical protein	- none -
fig|720555.3.peg.86	CDS	Contig8	90463	90603	1	+	141	hypothetical protein	- none -
fig|720555.3.peg.87	CDS	Contig8	90644	91330	2	+	687	Transcriptional regulator, GntR family	- none -
fig|720555.3.peg.88	CDS	Contig8	91333	92562	1	+	1230	cyanate transporter	- none -
fig|720555.3.peg.89	CDS	Contig8	92976	92671	-3	-	306	hypothetical protein	- none -
fig|720555.3.peg.90	CDS	Contig8	93716	92991	-2	-	726	hypothetical protein	- none -
fig|720555.3.peg.91	CDS	Contig8	94610	93801	-2	-	810	Transcriptional regulator, TrmB family	- none -
fig|720555.3.peg.92	CDS	Contig8	94929	95066	3	+	138	hypothetical protein	- none -
fig|720555.3.peg.93	CDS	Contig8	100980	101954	3	+	975	Thiamine-monophosphate kinase (EC 2.7.4.16)	Thiamin biosynthesis
fig|720555.3.peg.94	CDS	Contig8	101970	102446	3	+	477	ATPase YjeE, predicted to have essential role in cell wall biosynthesis	YjeE; <br>Cell envelope-associated LytR-CpsA-Psr transcriptional attenuators
fig|720555.3.peg.95	CDS	Contig8	102553	103116	1	+	564	Inactive homolog of metal-dependent proteases, putative molecular chaperone	YjeE; <br>Bacterial RNA-metabolizing Zn-dependent hydrolases; <br>Conserved gene cluster associated with Met-tRNA formyltransferase; <br>YgjD and YeaZ; <br>Ribosome biogenesis bacterial
fig|720555.3.peg.96	CDS	Contig8	103126	103581	1	+	456	Ribosomal-protein-S18p-alanine acetyltransferase (EC 2.3.1.-)	Bacterial RNA-metabolizing Zn-dependent hydrolases; <br>Conserved gene cluster associated with Met-tRNA formyltransferase; <br>Ribosome biogenesis bacterial
fig|720555.3.peg.97	CDS	Contig8	103574	104614	2	+	1041	FIG134348: essential endopeptidase	Bacterial RNA-metabolizing Zn-dependent hydrolases; <br>Conserved gene cluster associated with Met-tRNA formyltransferase; <br>YgjD and YeaZ
fig|720555.3.peg.98	CDS	Contig8	106761	104833	-3	-	1929	ABC transporter ATP-binding protein uup	CBSS-393121.3.peg.2760
fig|720555.3.peg.99	CDS	Contig8	106905	107417	3	+	513	Molybdenum cofactor biosynthesis protein MoaC	- none -
fig|720555.3.peg.100	CDS	Contig8	107414	108061	2	+	648	Redox-sensitive transcriptional regulator (AT-rich DNA-binding protein)	Oxidative stress
fig|720555.3.peg.101	CDS	Contig8	108084	108257	3	+	174	Twin-arginine translocation protein TatA	Twin-arginine translocation system
fig|720555.3.peg.102	CDS	Contig8	108273	109025	3	+	753	Twin-arginine translocation protein TatC	Twin-arginine translocation system
fig|720555.3.peg.103	CDS	Contig8	109249	109070	-1	-	180	unknown	- none -
fig|720555.3.peg.104	CDS	Contig8	109992	109258	-3	-	735	CAAX amino terminal protease family protein	- none -
fig|720555.3.peg.105	CDS	Contig8	110231	110515	2	+	285	Heat shock protein 60 family co-chaperone GroES	GroEL GroES
fig|720555.3.peg.106	CDS	Contig8	110563	112197	1	+	1635	Heat shock protein 60 family chaperone GroEL	GroEL GroES
fig|720555.3.peg.107	CDS	Contig8	114465	112675	-3	-	1791	Two-component protein Kinase	- none -
fig|720555.3.peg.108	CDS	Contig8	115060	114470	-1	-	591	hypothetical protein	- none -
fig|720555.3.peg.109	CDS	Contig8	115345	117354	1	+	2010	hypothetical protein	- none -
fig|720555.3.peg.110	CDS	Contig8	118420	117941	-1	-	480	response regulator	- none -
fig|720555.3.peg.111	CDS	Contig8	120911	118407	-2	-	2505	transcriptional regulator	- none -
fig|720555.3.peg.112	CDS	Contig8	121104	120943	-3	-	162	hypothetical protein	- none -
fig|720555.3.peg.113	CDS	Contig8	121145	122212	2	+	1068	Sorbitol dehydrogenase (EC 1.1.1.14)	- none -
fig|720555.3.peg.114	CDS	Contig8	122307	123704	3	+	1398	H+-symporter	- none -
fig|720555.3.peg.115	CDS	Contig8	123862	124791	1	+	930	Fructokinase (EC 2.7.1.4)	Sucrose utilization; <br>Mannitol Utilization; <br>Fructose utilization
fig|720555.3.peg.116	CDS	Contig8	125229	125909	3	+	681	Phage shock protein A	- none -
fig|720555.3.peg.117	CDS	Contig8	126018	127004	3	+	987	Primosomal protein N&#39; (replication factor Y) - superfamily II helicase	- none -
fig|720555.3.peg.118	CDS	Contig8	127004	127768	2	+	765	unknown	- none -
fig|720555.3.peg.119	CDS	Contig8	127806	128783	3	+	978	unknown	- none -
fig|720555.3.peg.120	CDS	Contig8	130067	129210	-2	-	858	anti-sigma factor homolog yrhM	- none -
fig|720555.3.peg.121	CDS	Contig8	130564	130067	-1	-	498	RNA polymerase sigma factor SigV	Transcription initiation, bacterial sigma factors
fig|720555.3.peg.122	CDS	Contig8	131084	130902	-2	-	183	Spore coat protein C	- none -
fig|720555.3.peg.123	CDS	Contig8	131948	131310	-2	-	639	Oxygen-insensitive NAD(P)H nitroreductase (EC 1.-.-.-) / Dihydropteridine reductase (EC 1.5.1.34)	- none -
fig|720555.3.peg.124	CDS	Contig8	132398	131964	-2	-	435	Uncharacterized HTH-type transcriptional regulator ydgJ	- none -
fig|720555.3.peg.125	CDS	Contig8	132914	134554	2	+	1641	Major myo-inositol transporter IolT	Inositol catabolism
fig|720555.3.peg.126	CDS	Contig8	135696	134656	-3	-	1041	2,3-butanediol dehydrogenase, R-alcohol forming, (R)- and (S)-acetoin-specific (EC 1.1.1.4)	Acetoin, butanediol metabolism
fig|720555.3.peg.127	CDS	Contig8	135748	135864	1	+	117	hypothetical protein	- none -
fig|720555.3.peg.128	CDS	Contig8	136265	136633	2	+	369	YdjM	- none -
fig|720555.3.peg.129	CDS	Contig8	136695	137738	3	+	1044	hypothetical protein	- none -
fig|720555.3.peg.130	CDS	Contig8	137976	137821	-3	-	156	hypothetical protein	- none -
fig|720555.3.peg.131	CDS	Contig8	138320	138111	-2	-	210	hypothetical protein	- none -
fig|720555.3.peg.132	CDS	Contig8	139217	138402	-2	-	816	Biotin synthesis protein bioH	Biotin biosynthesis
fig|720555.3.peg.133	CDS	Contig8	140244	139234	-3	-	1011	hypothetical protein	- none -
fig|720555.3.peg.134	CDS	Contig8	141892	140351	-1	-	1542	Spore coat protein A	- none -
fig|720555.3.peg.135	CDS	Contig8	143393	141981	-2	-	1413	gamma-aminobutyrate (GABA) permease	- none -
fig|720555.3.peg.136	CDS	Contig8	143647	144705	1	+	1059	Acyltransferase 3	- none -
fig|720555.3.peg.137	CDS	Contig8	144967	145839	1	+	873	YeaB (Cation efflux protein)	- none -
fig|720555.3.peg.138	CDS	Contig8	145861	146004	1	+	144	hypothetical protein	- none -
fig|720555.3.peg.139	CDS	Contig8	146051	147013	2	+	963	FIG022979: MoxR-like ATPases	CBSS-1140.3.peg.2017
fig|720555.3.peg.140	CDS	Contig8	147013	148215	1	+	1203	FIG002343: hypothetical protein	CBSS-1140.3.peg.2017
fig|720555.3.peg.141	CDS	Contig8	148237	150435	1	+	2199	FIG001454: Transglutaminase-like enzymes, putative cysteine proteases	CBSS-1140.3.peg.2017
fig|720555.3.peg.142	CDS	Contig8	150599	152149	2	+	1551	GMP synthase [glutamine-hydrolyzing] (EC 6.3.5.2)	Purine conversions
fig|720555.3.peg.143	CDS	Contig8	152261	152794	2	+	534	RNA polymerase sigma factor SigV	Transcription initiation, bacterial sigma factors
fig|720555.3.peg.144	CDS	Contig8	152776	154236	1	+	1461	hypothetical protein	- none -
fig|720555.3.peg.145	CDS	Contig8	154626	155948	3	+	1323	Hypoxanthine/guanine permease PbuG	- none -
fig|720555.3.peg.146	CDS	Contig8	156176	156952	2	+	777	Uncharacterized protein yebC	- none -
fig|720555.3.peg.147	CDS	Contig8	157076	156939	-2	-	138	hypothetical protein	- none -
fig|720555.3.peg.148	CDS	Contig8	157119	157292	3	+	174	Uncharacterized protein yebD	- none -
fig|720555.3.peg.149	CDS	Contig8	157492	158043	1	+	552	hypothetical protein	- none -
fig|720555.3.peg.150	CDS	Contig8	158043	158240	3	+	198	unknown	- none -
fig|720555.3.peg.151	CDS	Contig8	158554	159042	1	+	489	Phosphoribosylaminoimidazole carboxylase catalytic subunit (EC 4.1.1.21)	De Novo Purine Biosynthesis
fig|720555.3.peg.152	CDS	Contig8	159035	160177	2	+	1143	Phosphoribosylaminoimidazole carboxylase ATPase subunit (EC 4.1.1.21)	De Novo Purine Biosynthesis
fig|720555.3.peg.153	CDS	Contig8	160174	161469	1	+	1296	Adenylosuccinate lyase (EC 4.3.2.2)	Purine conversions; <br>De Novo Purine Biosynthesis
fig|720555.3.peg.154	CDS	Contig8	161543	162259	2	+	717	Phosphoribosylaminoimidazole-succinocarboxamide synthase (EC 6.3.2.6)	De Novo Purine Biosynthesis
fig|720555.3.peg.155	CDS	Contig8	162261	162515	3	+	255	Phosphoribosylformylglycinamidine synthase, PurS subunit (EC 6.3.5.3)	De Novo Purine Biosynthesis
fig|720555.3.peg.156	CDS	Contig8	162512	163195	2	+	684	Phosphoribosylformylglycinamidine synthase, glutamine amidotransferase subunit (EC 6.3.5.3)	De Novo Purine Biosynthesis
fig|720555.3.peg.157	CDS	Contig8	163179	165407	3	+	2229	Phosphoribosylformylglycinamidine synthase, synthetase subunit (EC 6.3.5.3)	De Novo Purine Biosynthesis
fig|720555.3.peg.158	CDS	Contig8	165383	166813	2	+	1431	Amidophosphoribosyltransferase (EC 2.4.2.14)	De Novo Purine Biosynthesis
fig|720555.3.peg.159	CDS	Contig8	166919	167959	2	+	1041	Phosphoribosylformylglycinamidine cyclo-ligase (EC 6.3.3.1)	De Novo Purine Biosynthesis
fig|720555.3.peg.160	CDS	Contig8	167956	168543	1	+	588	Phosphoribosylglycinamide formyltransferase (EC 2.1.2.2)	Glutathione-regulated potassium-efflux system and associated functions; <br>De Novo Purine Biosynthesis
fig|720555.3.peg.161	CDS	Contig8	168540	170078	3	+	1539	IMP cyclohydrolase (EC 3.5.4.10) / Phosphoribosylaminoimidazolecarboxamide formyltransferase (EC 2.1.2.3)	De Novo Purine Biosynthesis; <br>De Novo Purine Biosynthesis
fig|720555.3.peg.162	CDS	Contig8	170094	171362	3	+	1269	Phosphoribosylamine--glycine ligase (EC 6.3.4.13)	De Novo Purine Biosynthesis
fig|720555.3.peg.163	CDS	Contig8	171826	171404	-1	-	423	Leucine-responsive regulatory protein, regulator for leucine (or lrp) regulon and high-affinity branched-chain amino acid transport system	- none -
fig|720555.3.peg.164	CDS	Contig8	171969	173222	3	+	1254	Amino acid permease family protein	- none -
fig|720555.3.peg.165	CDS	Contig8	173472	173242	-3	-	231	hypothetical protein	- none -
fig|720555.3.peg.166	CDS	Contig8	173603	175345	2	+	1743	Adenine deaminase (EC 3.5.4.2)	Purine conversions
fig|720555.3.peg.167	CDS	Contig8	175372	176367	1	+	996	BH0638 unknown conserved protein	- none -
fig|720555.3.peg.168	CDS	Contig8	176370	176684	3	+	315	His repressor	CBSS-393121.3.peg.1913
fig|720555.3.peg.169	CDS	Contig8	178294	176720	-1	-	1575	Ferredoxin-dependent glutamate synthase (EC 1.4.7.1)	cAMP signaling in bacteria; <br>Ammonia assimilation; <br>Glutamine, Glutamate, Aspartate and Asparagine Biosynthesis
fig|720555.3.peg.170	CDS	Contig8	178546	179235	1	+	690	(S)-3-O-geranylgeranylglyceryl phosphate synthase	CBSS-393121.3.peg.1913
fig|720555.3.peg.171	CDS	Contig8	179295	181514	3	+	2220	ATP-dependent DNA helicase UvrD/PcrA	CBSS-393121.3.peg.1913; <br>DNA repair, bacterial UvrD and related helicases
fig|720555.3.peg.172	CDS	Contig8	181539	183545	3	+	2007	DNA ligase (EC 6.5.1.2)	CBSS-393121.3.peg.1913; <br>NAD and NADP cofactor biosynthesis global
fig|720555.3.peg.173	CDS	Contig8	183561	184754	3	+	1194	Putative pheromone cAM373 precursor lipoprotein CamS	- none -
fig|720555.3.peg.174	CDS	Contig8	185059	186060	1	+	1002	Homoserine kinase (EC 2.7.1.39)	Methionine Biosynthesis; <br>Threonine and Homoserine Biosynthesis; <br>CBSS-269482.1.peg.1294
fig|720555.3.peg.175	CDS	Contig8	186835	186143	-1	-	693	Peptide transport system permease protein sapB (TC 3.A.1.5.5)	ABC transporter peptide (TC 3.A.1.5.5)
fig|720555.3.peg.176	CDS	Contig8	188436	186958	-3	-	1479	Pantothenate:Na+ symporter (TC 2.A.21.1.1)	Coenzyme A Biosynthesis
fig|720555.3.peg.177	CDS	Contig8	188851	189141	1	+	291	Aspartyl-tRNA(Asn) amidotransferase subunit C (EC 6.3.5.6) @ Glutamyl-tRNA(Gln) amidotransferase subunit C (EC 6.3.5.7)	tRNA aminoacylation, Glu and Gln; <br>tRNA aminoacylation, Asp and Asn
fig|720555.3.peg.178	CDS	Contig8	189157	190614	1	+	1458	Aspartyl-tRNA(Asn) amidotransferase subunit A (EC 6.3.5.6) @ Glutamyl-tRNA(Gln) amidotransferase subunit A (EC 6.3.5.7)	tRNA aminoacylation, Glu and Gln; <br>tRNA aminoacylation, Asp and Asn
fig|720555.3.peg.179	CDS	Contig8	190628	192058	2	+	1431	Aspartyl-tRNA(Asn) amidotransferase subunit B (EC 6.3.5.6) @ Glutamyl-tRNA(Gln) amidotransferase subunit B (EC 6.3.5.7)	tRNA aminoacylation, Glu and Gln; <br>tRNA aminoacylation, Asp and Asn
fig|720555.3.peg.180	CDS	Contig8	192950	192093	-2	-	858	TetR family transcriptional regulator probably coupled to RND multidrug efflux transporter	- none -
fig|720555.3.peg.181	CDS	Contig8	193080	196244	3	+	3165	Swarming motility protein SwrC	Bacterial motility:Gliding
fig|720555.3.peg.182	CDS	Contig8	196416	197327	3	+	912	Transcription regulator [contains diacylglycerol kinase catalytic domain]	- none -
fig|720555.3.peg.183	CDS	Contig8	197383	198765	1	+	1383	RNA methyltransferase, TrmA family	- none -
fig|720555.3.peg.184	CDS	Contig8	199944	199342	-3	-	603	Asparagine synthetase [glutamine-hydrolyzing] (EC 6.3.5.4)	Glutamine, Glutamate, Aspartate and Asparagine Biosynthesis
fig|720555.3.peg.185	CDS	Contig8	200773	201336	1	+	564	hypothetical protein	- none -
fig|720555.3.peg.186	CDS	Contig8	201356	201619	2	+	264	unknown	- none -
fig|720555.3.peg.187	CDS	Contig8	201936	202061	3	+	126	hypothetical protein	- none -
fig|720555.3.peg.188	CDS	Contig8	202064	203263	2	+	1200	3-oxoacyl-[acyl-carrier-protein] synthase, KASII (EC 2.3.1.41)	Fatty Acid Biosynthesis FASII
fig|720555.3.peg.189	CDS	Contig8	203284	204225	1	+	942	hypothetical protein	- none -
fig|720555.3.peg.190	CDS	Contig8	204246	204959	3	+	714	3-oxoacyl-[acyl-carrier protein] reductase (EC 1.1.1.100)	Fatty Acid Biosynthesis FASII
fig|720555.3.peg.191	CDS	Contig8	204995	205951	2	+	957	ABC transporter, ATP-binding protein	- none -
fig|720555.3.peg.192	CDS	Contig8	205952	206827	2	+	876	hypothetical protein	- none -
fig|720555.3.peg.193	CDS	Contig8	207945	207460	-3	-	486	Repetitive hypothetical protein near ESAT cluster, SA0282 homolog	- none -
fig|720555.3.peg.194	CDS	Contig8	208171	208064	-1	-	108	hypothetical protein	- none -
fig|720555.3.peg.195	CDS	Contig8	208310	208209	-2	-	102	hypothetical protein	- none -
fig|720555.3.peg.196	CDS	Contig8	208980	208615	-3	-	366	COG3210: Large exoproteins involved in heme utilization or adhesion	- none -
fig|720555.3.peg.197	CDS	Contig8	209192	208992	-2	-	201	YokI	- none -
fig|720555.3.peg.198	CDS	Contig8	209469	209185	-3	-	285	YokI	- none -
fig|720555.3.peg.199	CDS	Contig8	209895	211010	3	+	1116	response regulator aspartate phosphatase	- none -
fig|720555.3.peg.200	CDS	Contig8	211010	211132	2	+	123	hypothetical protein	- none -
fig|720555.3.peg.201	CDS	Contig8	211249	212109	1	+	861	hypothetical protein	- none -
fig|720555.3.peg.202	CDS	Contig8	212779	213015	1	+	237	hypothetical protein	- none -
fig|720555.3.peg.203	CDS	Contig8	213005	213139	2	+	135	hypothetical protein	- none -
fig|720555.3.peg.204	CDS	Contig8	213139	214017	1	+	879	hypothetical protein	- none -
fig|720555.3.peg.205	CDS	Contig8	214166	214014	-2	-	153	hypothetical protein	- none -
fig|720555.3.peg.206	CDS	Contig8	214158	215288	3	+	1131	response regulator aspartate phosphatase	- none -
fig|720555.3.peg.207	CDS	Contig8	215278	215406	1	+	129	hypothetical protein	- none -
fig|720555.3.peg.208	CDS	Contig8	215663	216382	2	+	720	FIG000859: hypothetical protein	RuvABC plus a hypothetical
fig|720555.3.peg.209	CDS	Contig8	216661	216482	-1	-	180	Transposase	- none -
fig|720555.3.peg.210	CDS	Contig8	216845	216753	-2	-	93	hypothetical protein	- none -
fig|720555.3.peg.211	CDS	Contig8	217083	217331	3	+	249	Polypeptide composition of the spore coat; required for the assembly of CotJC	- none -
fig|720555.3.peg.212	CDS	Contig8	217315	217578	1	+	264	Polypeptide composition of the spore coat protein CotJB	- none -
fig|720555.3.peg.213	CDS	Contig8	217592	218161	2	+	570	Polypeptide composition of the spore coat protein CotJC	- none -
fig|720555.3.peg.214	CDS	Contig8	218293	218835	1	+	543	acetyltransferase, GNAT family	- none -
fig|720555.3.peg.215	CDS	Contig8	218901	219209	3	+	309	Uncharacterized protein yesK	- none -
fig|720555.3.peg.216	CDS	Contig8	219352	219972	1	+	621	YESL protein	- none -
fig|720555.3.peg.217	CDS	Contig8	219972	221702	3	+	1731	two-component sensor histidine kinase	- none -
fig|720555.3.peg.218	CDS	Contig8	221702	222829	2	+	1128	DNA-binding response regulator, AraC family	- none -
fig|720555.3.peg.219	CDS	Contig8	222934	224220	1	+	1287	Predicted rhamnose oligosaccharide ABC transport system, substrate-binding component	L-rhamnose utilization
fig|720555.3.peg.220	CDS	Contig8	224242	225147	1	+	906	Predicted rhamnose oligosaccharide ABC transport system, permease component 2	L-rhamnose utilization
fig|720555.3.peg.221	CDS	Contig8	225151	226044	1	+	894	Predicted rhamnose oligosaccharide ABC transport system, permease component	L-rhamnose utilization
fig|720555.3.peg.222	CDS	Contig8	226060	227094	1	+	1035	Rhamnogalacturonides degradation protein RhiN	L-rhamnose utilization
fig|720555.3.peg.223	CDS	Contig8	227118	229442	3	+	2325	Transcriptional regulator, AraC family	- none -
fig|720555.3.peg.224	CDS	Contig8	229460	230155	2	+	696	rhamnogalacturonan acetylesterase	L-rhamnose utilization
fig|720555.3.peg.225	CDS	Contig8	230148	230810	3	+	663	unknown	- none -
fig|720555.3.peg.226	CDS	Contig8	230807	231433	2	+	627	YESV protein	- none -
fig|720555.3.peg.227	CDS	Contig8	231572	233422	2	+	1851	Predicted rhamnogalacturonan lyase in rhamnose utilization cluster	L-rhamnose utilization
fig|720555.3.peg.228	CDS	Contig8	233496	235313	3	+	1818	Predicted rhamnogalacturonan lyase in rhamnose utilization cluster	L-rhamnose utilization
fig|720555.3.peg.229	CDS	Contig8	235421	236074	2	+	654	rhamnogalacturonan acetylesterase	L-rhamnose utilization
fig|720555.3.peg.230	CDS	Contig8	236081	238072	2	+	1992	Beta-galactosidase (EC 3.2.1.23)	Lactose and Galactose Uptake and Utilization; <br>Galactosylceramide and Sulfatide metabolism; <br>Lactose utilization
fig|720555.3.peg.231	CDS	Contig8	238119	240692	3	+	2574	unknown	- none -
fig|720555.3.peg.232	CDS	Contig8	240810	242333	3	+	1524	Lipoprotein lplA precursor	- none -
fig|720555.3.peg.233	CDS	Contig8	242389	243345	1	+	957	ABC-type polysaccharide transport system, permease component	- none -
fig|720555.3.peg.234	CDS	Contig8	243370	244257	1	+	888	Probable ABC transporter permease protein ytcP	- none -
fig|720555.3.peg.235	CDS	Contig8	244267	245613	1	+	1347	Alpha-galactosidase (EC 3.2.1.22)	Galactosylceramide and Sulfatide metabolism; <br>Melibiose Utilization
fig|720555.3.peg.236	CDS	Contig8	245731	246426	1	+	696	hypothetical protein	- none -
fig|720555.3.peg.237	CDS	Contig8	246839	246516	-2	-	324	Antibiotic biosynthesis monooxygenase domain-containing protein	Heme, hemin uptake and utilization systems in GramPositives
fig|720555.3.peg.238	CDS	Contig8	247306	246944	-1	-	363	Glyoxalase family protein	- none -
fig|720555.3.peg.239	CDS	Contig8	247521	248390	3	+	870	RsbR, positive regulator of sigma-B	SigmaB stress responce regulation
fig|720555.3.peg.240	CDS	Contig8	248642	248824	2	+	183	hypothetical protein	- none -
fig|720555.3.peg.241	CDS	Contig8	248861	249175	2	+	315	riboflavin kinase( EC:2.7.1.26 )	- none -
fig|720555.3.peg.242	CDS	Contig8	249297	249941	3	+	645	membrane protein	- none -
fig|720555.3.peg.243	CDS	Contig8	251201	250131	-2	-	1071	hypothetical protein	- none -
fig|720555.3.peg.244	CDS	Contig8	251373	254558	3	+	3186	bifunctional P-450:NADPH-P450 reductase 1	- none -
fig|720555.3.peg.245	CDS	Contig8	255288	255881	3	+	594	hypothetical protein	- none -
fig|720555.3.peg.246	CDS	Contig8	255943	256167	1	+	225	hypothetical protein	- none -
fig|720555.3.peg.247	CDS	Contig8	256187	257077	2	+	891	ABC transporter, ATP-binding protein	- none -
fig|720555.3.peg.248	CDS	Contig8	257092	257832	1	+	741	ABC transporter, permease protein	- none -
fig|720555.3.peg.249	CDS	Contig8	257865	257981	3	+	117	hypothetical protein	- none -
fig|720555.3.peg.250	CDS	Contig8	258513	260435	3	+	1923	Lipoteichoic acid synthase LtaS Type Ib	- none -
fig|720555.3.peg.251	CDS	Contig8	260684	261448	2	+	765	Glucose-1-phosphate cytidylyltransferase (EC 2.7.7.33)	dTDP-rhamnose synthesis; <br>Acetoin, butanediol metabolism
fig|720555.3.peg.252	CDS	Contig8	261455	262423	2	+	969	Similar to CDP-glucose 4,6-dehydratase (EC 4.2.1.45)	Acetoin, butanediol metabolism
fig|720555.3.peg.253	CDS	Contig8	262449	263360	3	+	912	hypothetical protein	- none -
fig|720555.3.peg.254	CDS	Contig8	263388	264551	3	+	1164	Acyl-CoA dehydrogenase, short-chain specific (EC 1.3.99.2)	- none -
fig|720555.3.peg.255	CDS	Contig8	264563	265501	2	+	939	hypothetical protein	- none -
fig|720555.3.peg.256	CDS	Contig8	266777	265545	-2	-	1233	fosmidomycin resistance protein	- none -
fig|720555.3.peg.257	CDS	Contig8	268283	266898	-2	-	1386	Amino acid permease	- none -
fig|720555.3.peg.258	CDS	Contig8	268540	269997	1	+	1458	Aldehyde dehydrogenase (EC 1.2.1.3)	Pyruvate metabolism II: acetyl-CoA, acetogenesis from pyruvate; <br>Glycerolipid and Glycerophospholipid Metabolism in Bacteria; <br>Methylglyoxal Metabolism; <br>Entner-Doudoroff Pathway
fig|720555.3.peg.259	CDS	Contig8	270016	270870	1	+	855	Methyl-accepting chemotaxis protein	- none -
fig|720555.3.peg.260	CDS	Contig8	271986	270910	-3	-	1077	Glycosyl transferase, group 2 family protein	Exopolysaccharide Biosynthesis
fig|720555.3.peg.261	CDS	Contig8	272202	274091	3	+	1890	COG0488: ATPase components of ABC transporters with duplicated ATPase domains	Folate Biosynthesis
fig|720555.3.peg.262	CDS	Contig8	274207	274629	1	+	423	HTH-type transcriptional regulator yfmP	- none -
fig|720555.3.peg.263	CDS	Contig8	274693	275883	1	+	1191	major facilitator family transporter	- none -
fig|720555.3.peg.264	CDS	Contig8	276074	276586	2	+	513	Acetyltransferase (EC 2.3.1.-)	- none -
fig|720555.3.peg.265	CDS	Contig8	278237	276681	-2	-	1557	ABC transporter ATP-binding protein	- none -
fig|720555.3.peg.266	CDS	Contig8	278407	279537	1	+	1131	ATP-dependent RNA helicase YfmL	ATP-dependent RNA helicases, bacterial
fig|720555.3.peg.267	CDS	Contig8	279693	280853	3	+	1161	response regulator aspartate phosphatase	- none -
fig|720555.3.peg.268	CDS	Contig8	280843	280962	1	+	120	hypothetical protein	- none -
fig|720555.3.peg.269	CDS	Contig8	282030	280999	-3	-	1032	Putative oxidoreductase YncB	Broadly distributed proteins not in subsystems
fig|720555.3.peg.270	CDS	Contig8	282954	282157	-3	-	798	Ferrichrome transport ATP-binding protein FhuC (TC 3.A.1.14.3)	Hemin transport system; <br>Flavohaemoglobin
fig|720555.3.peg.271	CDS	Contig8	283968	282967	-3	-	1002	Heme ABC type transporter HtsABC, permease protein HtsC	Heme, hemin uptake and utilization systems in GramPositives
fig|720555.3.peg.272	CDS	Contig8	285008	283965	-2	-	1044	Heme ABC type transporter HtsABC, permease protein HtsB	Heme, hemin uptake and utilization systems in GramPositives
fig|720555.3.peg.273	CDS	Contig8	285988	285035	-1	-	954	Heme ABC type transporter HtsABC, heme-binding protein	Flavohaemoglobin; <br>Heme, hemin uptake and utilization systems in GramPositives
fig|720555.3.peg.274	CDS	Contig8	286470	286093	-3	-	378	hypothetical protein	- none -
fig|720555.3.peg.275	CDS	Contig8	286673	286557	-2	-	117	hypothetical protein	- none -
fig|720555.3.peg.276	CDS	Contig8	286691	287038	2	+	348	Dehydrogenase flavoprotein LodB	- none -
fig|720555.3.peg.277	CDS	Contig8	287248	288507	1	+	1260	pectate lyase	- none -
fig|720555.3.peg.278	CDS	Contig8	288596	289075	2	+	480	acetyltransferase, GNAT family	- none -
fig|720555.3.peg.279	CDS	Contig8	289638	291074	3	+	1437	2-oxoglutarate/malate translocator	- none -
fig|720555.3.peg.280	CDS	Contig8	291184	291891	1	+	708	Collagen triple helix repeat	- none -
fig|720555.3.peg.281	CDS	Contig8	292023	296030	3	+	4008	collagen triple helix repeat domain protein	- none -
fig|720555.3.peg.282	CDS	Contig8	296243	296124	-2	-	120	NAD(P)H oxidoreductase YRKL (EC 1.6.99.-) @ Putative NADPH-quinone reductase (modulator of drug activity B) @ Flavodoxin 2	Flavodoxin; <br>Flavodoxin
fig|720555.3.peg.283	CDS	Contig8	296535	298127	3	+	1593	Sensor kinase CitA, DpiB (EC 2.7.3.-)	- none -
fig|720555.3.peg.284	CDS	Contig8	298146	298832	3	+	687	Transcriptional regulatory protein CitB, DpiA	- none -
fig|720555.3.peg.285	CDS	Contig8	298844	299806	2	+	963	unknown	- none -
fig|720555.3.peg.286	CDS	Contig8	299995	301293	1	+	1299	Mg(2+) Citrate transporter (TC 2.A.11.1.1)	- none -
fig|720555.3.peg.287	CDS	Contig8	301357	302154	1	+	798	metallo-beta-lactamase family protein	- none -
fig|720555.3.peg.288	CDS	Contig8	302273	303370	2	+	1098	Nitric oxide synthase oxygenase (EC 1.-.-.-)	Nitric oxide synthase
fig|720555.3.peg.289	CDS	Contig8	303636	303364	-3	-	273	Acylphosphate phosphohydrolase (EC 3.6.1.7), putative	Pyruvate metabolism II: acetyl-CoA, acetogenesis from pyruvate
fig|720555.3.peg.290	CDS	Contig8	303702	304364	3	+	663	Uncharacterized protein conserved in bacteria	- none -
fig|720555.3.peg.291	CDS	Contig8	304548	304408	-3	-	141	unknown	- none -
fig|720555.3.peg.292	CDS	Contig8	304883	304728	-2	-	156	hypothetical protein	- none -
fig|720555.3.peg.293	CDS	Contig8	305268	304993	-3	-	276	hypothetical protein	- none -
fig|720555.3.peg.294	CDS	Contig8	306169	305387	-1	-	783	Methionine aminopeptidase (EC 3.4.11.18)	- none -
fig|720555.3.peg.295	CDS	Contig8	306309	307670	3	+	1362	PTS system, N-acetylglucosamine-specific IIB component (EC 2.7.1.69) / PTS system, N-acetylglucosamine-specific IIC component (EC 2.7.1.69)	Chitin and N-acetylglucosamine utilization; <br>Chitin and N-acetylglucosamine utilization; <br>Sialic Acid Metabolism; <br>Sialic Acid Metabolism
fig|720555.3.peg.296	CDS	Contig8	309660	307711	-3	-	1950	Lipoteichoic acid synthase LtaS Type Ia	- none -
fig|720555.3.peg.297	CDS	Contig8	309660	309812	3	+	153	hypothetical protein	- none -
fig|720555.3.peg.298	CDS	Contig8	309922	310296	1	+	375	hypothetical protein	- none -
fig|720555.3.peg.299	CDS	Contig8	310387	311787	1	+	1401	Na(+)-linked D-alanine glycine permease	- none -
fig|720555.3.peg.300	CDS	Contig8	311950	313362	1	+	1413	PTS system, trehalose-specific IIB component (EC 2.7.1.69) / PTS system, trehalose-specific IIC component (EC 2.7.1.69)	Trehalose Uptake and Utilization; <br>Trehalose Uptake and Utilization
fig|720555.3.peg.301	CDS	Contig8	313441	315135	1	+	1695	Trehalose-6-phosphate hydrolase (EC 3.2.1.93)	Trehalose Uptake and Utilization
fig|720555.3.peg.302	CDS	Contig8	315156	315872	3	+	717	Trehalose operon transcriptional repressor	Trehalose Uptake and Utilization
fig|720555.3.peg.303	CDS	Contig8	316015	316680	1	+	666	Oxygen-insensitive NAD(P)H nitroreductase (EC 1.-.-.-) / Dihydropteridine reductase (EC 1.5.1.34)	- none -
fig|720555.3.peg.304	CDS	Contig8	320935	316712	-1	-	4224	2&#39;,3&#39;-cyclic-nucleotide 2&#39;-phosphodiesterase (EC 3.1.4.16) / 5&#39;-nucleotidase (EC 3.1.3.5)	Glutathione-regulated potassium-efflux system and associated functions; <br>Purine conversions; <br>Purine conversions; <br>pyrimidine conversions; <br>pyrimidine conversions
fig|720555.3.peg.305	CDS	Contig8	321310	321825	1	+	516	ThiJ/PfpI family protein	CBSS-176280.1.peg.1561
fig|720555.3.peg.306	CDS	Contig8	322900	321887	-1	-	1014	Transcriptional regulator, LacI family	- none -
fig|720555.3.peg.307	CDS	Contig8	324295	323075	-1	-	1221	hypothetical protein	- none -
fig|720555.3.peg.308	CDS	Contig8	325476	324592	-3	-	885	Shikimate/quinate 5-dehydrogenase I beta (EC 1.1.1.282)	Common Pathway For Synthesis of Aromatic Compounds (DAHP synthase to chorismate); <br>Chorismate Synthesis; <br>Quinate degradation
fig|720555.3.peg.309	CDS	Contig8	326321	325560	-2	-	762	3-dehydroquinate dehydratase I (EC 4.2.1.10)	Common Pathway For Synthesis of Aromatic Compounds (DAHP synthase to chorismate); <br>Chorismate Synthesis; <br>Quinate degradation
fig|720555.3.peg.310	CDS	Contig8	327525	326338	-3	-	1188	putative transport system permease protein	- none -
fig|720555.3.peg.311	CDS	Contig8	328140	327925	-3	-	216	Hypothetical protein YfkK	LMPTP YfkJ cluster; <br>CBSS-176280.1.peg.1561
fig|720555.3.peg.312	CDS	Contig8	328460	328930	2	+	471	Low molecular weight protein tyrosine phosphatase (EC 3.1.3.48)	LMPTP YfkJ cluster; <br>LMPTP YwlE cluster; <br>CBSS-176280.1.peg.1561
fig|720555.3.peg.313	CDS	Contig8	328953	329288	3	+	336	hypothetical protein	- none -
fig|720555.3.peg.314	CDS	Contig8	329306	330145	2	+	840	Ribonuclease BN (EC 3.1.-.-)	tRNA processing; <br>LMPTP YfkJ cluster; <br>CBSS-176280.1.peg.1561
fig|720555.3.peg.315	CDS	Contig8	330157	330288	1	+	132	hypothetical protein	- none -
fig|720555.3.peg.316	CDS	Contig8	331521	330346	-3	-	1176	major facilitator family transporter	- none -
fig|720555.3.peg.317	CDS	Contig8	331691	331545	-2	-	147	hypothetical protein	- none -
fig|720555.3.peg.318	CDS	Contig8	331696	332754	1	+	1059	calcium/proton exchanger	- none -
fig|720555.3.peg.319	CDS	Contig8	332825	333619	2	+	795	unknown	- none -
fig|720555.3.peg.320	CDS	Contig8	334493	333657	-2	-	837	Potassium efflux system KefA protein / Small-conductance mechanosensitive channel	Potassium homeostasis
fig|720555.3.peg.321	CDS	Contig8	335621	334500	-2	-	1122	Thioredoxin-like oxidoreductases	- none -
fig|720555.3.peg.322	CDS	Contig8	335763	335948	3	+	186	unknown	- none -
fig|720555.3.peg.323	CDS	Contig8	336080	336871	2	+	792	Carbohydrate Esterase Family 4	- none -
fig|720555.3.peg.324	CDS	Contig8	337804	336926	-1	-	879	hypothetical protein	- none -
fig|720555.3.peg.325	CDS	Contig8	338523	337888	-3	-	636	hypothetical protein	- none -
fig|720555.3.peg.326	CDS	Contig8	339561	338602	-3	-	960	Magnesium and cobalt transport protein CorA	- none -
fig|720555.3.peg.327	CDS	Contig8	339680	340543	2	+	864	DNA-3-methyladenine glycosylase II (EC 3.2.2.21)	- none -
fig|720555.3.peg.328	CDS	Contig8	341538	340579	-3	-	960	hypothetical protein	- none -
fig|720555.3.peg.329	CDS	Contig8	341771	343171	2	+	1401	RNA methyltransferase, TrmA family	- none -
fig|720555.3.peg.330	CDS	Contig8	343932	344861	3	+	930	tRNA dihydrouridine synthase B (EC 1.-.-.-)	tRNA modification Archaea
fig|720555.3.peg.331	CDS	Contig8	345323	345778	2	+	456	unknown	- none -
fig|720555.3.peg.332	CDS	Contig8	346173	347162	3	+	990	Acetoin dehydrogenase E1 component alpha-subunit (EC 1.2.4.-)	Dehydrogenase complexes; <br>Acetoin, butanediol metabolism
fig|720555.3.peg.333	CDS	Contig8	347178	348206	3	+	1029	Acetoin dehydrogenase E1 component beta-subunit (EC 1.2.4.-)	Dehydrogenase complexes; <br>Acetoin, butanediol metabolism
fig|720555.3.peg.334	CDS	Contig8	348222	349424	3	+	1203	Dihydrolipoamide acetyltransferase component (E2) of acetoin dehydrogenase complex (EC 2.3.1.-)	Lipoic acid metabolism; <br>Dehydrogenase complexes; <br>Acetoin, butanediol metabolism
fig|720555.3.peg.335	CDS	Contig8	349440	350822	3	+	1383	Dihydrolipoamide dehydrogenase of acetoin dehydrogenase (EC 1.8.1.4)	Dehydrogenase complexes; <br>Acetoin, butanediol metabolism
fig|720555.3.peg.336	CDS	Contig8	350939	352750	2	+	1812	Transcriptional activator of acetoin dehydrogenase operon AcoR	Dehydrogenase complexes; <br>Acetoin, butanediol metabolism
fig|720555.3.peg.337	CDS	Contig8	352809	352988	3	+	180	acid-soluble spore protein H	- none -
fig|720555.3.peg.338	CDS	Contig8	353372	353046	-2	-	327	Protein of unknown function UPF0060	- none -
fig|720555.3.peg.339	CDS	Contig8	354013	353456	-1	-	558	hypothetical protein	- none -
fig|720555.3.peg.340	CDS	Contig8	354818	354027	-2	-	792	Uncharacterized protein yfjC	- none -
fig|720555.3.peg.341	CDS	Contig8	356052	354829	-3	-	1224	hypothetical protein	- none -
fig|720555.3.peg.342	CDS	Contig8	356373	356071	-3	-	303	hypothetical protein	- none -
fig|720555.3.peg.343	CDS	Contig8	356493	356618	3	+	126	hypothetical protein	- none -
fig|720555.3.peg.344	CDS	Contig8	356713	358062	1	+	1350	Maltose-6&#39;-phosphate glucosidase (EC 3.2.1.122)	Trehalose Uptake and Utilization
fig|720555.3.peg.345	CDS	Contig8	358124	358888	2	+	765	Transcriptional regulator, RpiR family	- none -
fig|720555.3.peg.346	CDS	Contig8	358904	360490	2	+	1587	PTS system, maltose and glucose-specific IIC component (EC 2.7.1.69) / PTS system, maltose and glucose-specific IIB component (EC 2.7.1.69)	- none -
fig|720555.3.peg.347	CDS	Contig8	360671	362995	2	+	2325	phage pre-neck appendage-like protein	- none -
fig|720555.3.peg.348	CDS	Contig8	363280	365013	1	+	1734	Lipid A export ATP-binding/permease protein MsbA	ZZ gjo need homes
fig|720555.3.peg.349	CDS	Contig8	364994	366811	2	+	1818	Lipid A export ATP-binding/permease protein MsbA	ZZ gjo need homes
fig|720555.3.peg.350	CDS	Contig8	366980	367384	2	+	405	putative membrane protein	- none -
fig|720555.3.peg.351	CDS	Contig8	367402	368259	1	+	858	Glyoxalase family protein	- none -
fig|720555.3.peg.352	CDS	Contig8	368475	368942	3	+	468	putative ABC transporter (ATP-binding protein)	- none -
fig|720555.3.peg.353	CDS	Contig8	369535	368981	-1	-	555	Negative regulator of phenolic acid metabolism PadR	CBSS-1352.1.peg.856
fig|720555.3.peg.354	CDS	Contig8	369598	369729	1	+	132	hypothetical protein	- none -
fig|720555.3.peg.355	CDS	Contig8	369908	370993	2	+	1086	hypothetical protein	- none -
fig|720555.3.peg.356	CDS	Contig8	371185	371033	-1	-	153	hypothetical protein	- none -
fig|720555.3.peg.357	CDS	Contig8	371156	371428	2	+	273	putative RNAse inhibitor	- none -
fig|720555.3.peg.358	CDS	Contig8	371490	372497	3	+	1008	Bifunctional protein: zinc-containing alcohol dehydrogenase; quinone oxidoreductase ( NADPH:quinone reductase) (EC 1.1.1.-); Similar to arginate lyase	- none -
fig|720555.3.peg.359	CDS	Contig8	372548	373084	2	+	537	Putative metal-dependent hydrolase BCE33L2441 (EC 3.-.-.-)	- none -
fig|720555.3.peg.360	CDS	Contig8	374637	373081	-3	-	1557	drug resistance transporter, EmrB/QacA family	- none -
fig|720555.3.peg.361	CDS	Contig8	375232	374750	-1	-	483	Transcriptional regulator, MarR family	- none -
fig|720555.3.peg.362	CDS	Contig8	375401	377968	2	+	2568	virulence factor MprF	- none -
fig|720555.3.peg.363	CDS	Contig8	378989	378012	-2	-	978	ABC-type Fe3+-siderophore transport system, periplasmic iron-binding component	- none -
fig|720555.3.peg.364	CDS	Contig8	379143	380144	3	+	1002	ABC-type Fe3+-siderophore transport system, permease component	- none -
fig|720555.3.peg.365	CDS	Contig8	380141	381196	2	+	1056	ABC-type Fe3+-siderophore transport system, permease 2 component	- none -
fig|720555.3.peg.366	CDS	Contig8	381313	382194	1	+	882	Phenazine biosynthesis protein PhzF	- none -
fig|720555.3.peg.367	CDS	Contig8	382275	382859	3	+	585	Putative nitroreductase family protein SACOL0874	- none -
fig|720555.3.peg.368	CDS	Contig8	383089	382898	-1	-	192	unknown	- none -
fig|720555.3.peg.369	CDS	Contig8	384248	383337	-2	-	912	Cell division inhibitor	Persister Cells; <br>CBSS-261594.1.peg.788
fig|720555.3.peg.370	CDS	Contig8	384339	385130	3	+	792	Regulatory protein recX	- none -
fig|720555.3.peg.371	CDS	Contig8	385138	385464	1	+	327	Transcription regulator CDS_ID OB0894	CBSS-261594.1.peg.788; <br>CBSS-176280.1.peg.1561
fig|720555.3.peg.372	CDS	Contig8	385600	386799	1	+	1200	hypothetical protein	- none -
fig|720555.3.peg.373	CDS	Contig8	386992	386840	-1	-	153	hypothetical protein	- none -
fig|720555.3.peg.374	CDS	Contig8	387109	387378	1	+	270	Conserved protein YfhJ	- none -
fig|720555.3.peg.375	CDS	Contig8	387506	388042	2	+	537	hypothetical protein	- none -
fig|720555.3.peg.376	CDS	Contig8	388183	388530	1	+	348	hypothetical protein	- none -
fig|720555.3.peg.377	CDS	Contig8	388517	389383	2	+	867	hypothetical protein	- none -
fig|720555.3.peg.378	CDS	Contig8	389604	390557	3	+	954	stress response protein	- none -
fig|720555.3.peg.379	CDS	Contig8	390544	390678	1	+	135	hypothetical protein	- none -
fig|720555.3.peg.380	CDS	Contig8	390675	393251	3	+	2577	unknown	- none -
fig|720555.3.peg.381	CDS	Contig8	394227	393244	-3	-	984	Hypothetical protein SAV1869	CBSS-176280.1.peg.1561
fig|720555.3.peg.382	CDS	Contig8	394459	395553	1	+	1095	A/G-specific adenine glycosylase (EC 3.2.2.-)	CBSS-261594.1.peg.788; <br>DNA repair, bacterial; <br>CBSS-176280.1.peg.1561
fig|720555.3.peg.383	CDS	Contig8	395802	395578	-3	-	225	YfhS protein	- none -
fig|720555.3.peg.384	CDS	Contig8	395885	396637	2	+	753	Enoyl-[acyl-carrier-protein] reductase [NADPH] (EC 1.3.1.10)	Fatty Acid Biosynthesis FASII
fig|720555.3.peg.385	CDS	Contig8	396706	396954	1	+	249	Small acid-soluble spore protein, gamma-type SASP	Small acid-soluble spore proteins
fig|720555.3.peg.386	CDS	Contig8	396995	397144	2	+	150	hypothetical protein	- none -
fig|720555.3.peg.387	CDS	Contig8	397131	397391	3	+	261	unknown	- none -
fig|720555.3.peg.388	CDS	Contig8	397536	398066	3	+	531	Cysteinyl-tRNA synthetase related protein	CBSS-261594.1.peg.788
fig|720555.3.peg.389	CDS	Contig8	398150	399892	2	+	1743	Lipid A export ATP-binding/permease protein MsbA	ZZ gjo need homes
fig|720555.3.peg.390	CDS	Contig8	401025	399964	-3	-	1062	Putative lipoprotein SAV1865	- none -
fig|720555.3.peg.391	CDS	Contig8	402534	401245	-3	-	1290	Glutamate-1-semialdehyde aminotransferase (EC 5.4.3.8)	Heme and Siroheme Biosynthesis; <br>CBSS-196164.1.peg.461
fig|720555.3.peg.392	CDS	Contig8	402656	403174	2	+	519	Thiol peroxidase, Bcp-type (EC 1.11.1.15)	CBSS-316057.3.peg.3521; <br>Thioredoxin-disulfide reductase
fig|720555.3.peg.393	CDS	Contig8	403321	403758	1	+	438	Peroxide stress regulator PerR, FUR family	Oxidative stress
fig|720555.3.peg.394	CDS	Contig8	404146	403793	-1	-	354	hypothetical protein	- none -
fig|720555.3.peg.395	CDS	Contig8	404356	405240	1	+	885	CDS_ID OB0907	- none -
fig|720555.3.peg.396	CDS	Contig8	405221	405382	2	+	162	hypothetical protein	- none -
fig|720555.3.peg.397	CDS	Contig8	413762	412626	-2	-	1137	Uncharacterized zinc-type alcohol dehydrogenase-like protein ybdR	- none -
fig|720555.3.peg.398	CDS	Contig8	414144	413785	-3	-	360	Coat F	- none -
fig|720555.3.peg.399	CDS	Contig8	414365	414141	-2	-	225	Spore coat protein F	- none -
fig|720555.3.peg.400	CDS	Contig8	415188	414460	-3	-	729	Protein containing transglutaminase-like domain, putative cysteine protease	- none -
fig|720555.3.peg.401	CDS	Contig8	415265	415143	-2	-	123	hypothetical protein	- none -
fig|720555.3.peg.402	CDS	Contig8	415339	416034	1	+	696	Peptidase E (EC 3.4.11.2)	- none -
fig|720555.3.peg.403	CDS	Contig8	416353	418125	1	+	1773	Thiamin biosynthesis protein ThiC	Thiamin biosynthesis
fig|720555.3.peg.404	CDS	Contig8	418426	418608	1	+	183	Transcriptional regulatory protein senS	- none -
fig|720555.3.peg.405	CDS	Contig8	420168	418717	-3	-	1452	Catalase (EC 1.11.1.6)	Oxidative stress; <br>Protection from Reactive Oxygen Species
fig|720555.3.peg.406	CDS	Contig8	420482	421249	2	+	768	Alkanesulfonates ABC transporter ATP-binding protein	Alkanesulfonate assimilation; <br>Alkanesulfonates Utilization
fig|720555.3.peg.407	CDS	Contig8	421279	422262	1	+	984	Alkanesulfonates-binding protein	Alkanesulfonate assimilation; <br>Alkanesulfonates Utilization; <br>Putative sulfate assimilation cluster
fig|720555.3.peg.408	CDS	Contig8	422262	423095	3	+	834	Alkanesulfonates transport system permease protein	Alkanesulfonate assimilation; <br>Alkanesulfonates Utilization
fig|720555.3.peg.409	CDS	Contig8	423121	424257	1	+	1137	Alkanesulfonate monooxygenase (EC 1.14.14.5)	Alkanesulfonate assimilation; <br>Alkanesulfonates Utilization
fig|720555.3.peg.410	CDS	Contig8	424268	424399	2	+	132	hypothetical protein	- none -
fig|720555.3.peg.411	CDS	Contig8	424446	424715	3	+	270	SSU ribosomal protein S14p (S29e) ## Zinc-independent	- none -
fig|720555.3.peg.412	CDS	Contig8	425236	424760	-1	-	477	unknown	- none -
fig|720555.3.peg.413	CDS	Contig8	425468	425238	-2	-	231	DNA-binding protein	- none -
fig|720555.3.peg.414	CDS	Contig8	426430	425807	-1	-	624	hypothetical protein	- none -
fig|720555.3.peg.415	CDS	Contig8	426515	427675	2	+	1161	Iron-sulfur cluster-binding protein	Soluble cytochromes and functionally related electron carriers
fig|720555.3.peg.416	CDS	Contig8	427709	428671	2	+	963	hypothetical protein	- none -
fig|720555.3.peg.417	CDS	Contig8	428718	429191	3	+	474	tRNA (cytosine34-2&#39;-O-)-methyltransferase (EC 2.1.1.-)	Glutaredoxins
fig|720555.3.peg.418	CDS	Contig8	429283	429915	1	+	633	hypothetical protein	- none -
fig|720555.3.peg.419	CDS	Contig8	429928	430638	1	+	711	hypothetical protein	- none -
fig|720555.3.peg.420	CDS	Contig8	430650	431315	3	+	666	Uncharacterized protein yhbF	- none -
fig|720555.3.peg.421	CDS	Contig8	431302	431430	1	+	129	hypothetical protein	- none -
fig|720555.3.peg.422	CDS	Contig8	431459	431629	2	+	171	hypothetical protein	- none -
fig|720555.3.peg.423	CDS	Contig8	431686	433581	1	+	1896	serine protein kinase	- none -
fig|720555.3.peg.424	CDS	Contig8	433778	434956	2	+	1179	Glycosyltransferase (EC 2.4.1.-)	- none -
fig|720555.3.peg.425	CDS	Contig8	435012	435146	3	+	135	hypothetical protein	- none -
fig|720555.3.peg.426	CDS	Contig8	435143	435601	2	+	459	hypothetical protein	- none -
fig|720555.3.peg.427	CDS	Contig8	435643	436308	1	+	666	Multidrug resistance protein [function not yet clear]	Multidrug Resistance, 2-protein version Found in Gram-positive bacteria
fig|720555.3.peg.428	CDS	Contig8	436349	437959	2	+	1611	Membrane component of multidrug resistance system	Multidrug Resistance, 2-protein version Found in Gram-positive bacteria
fig|720555.3.peg.429	CDS	Contig8	437981	438511	2	+	531	YhcB	- none -
fig|720555.3.peg.430	CDS	Contig8	438524	438892	2	+	369	hypothetical protein	- none -
fig|720555.3.peg.431	CDS	Contig8	439058	439837	2	+	780	hypothetical protein	- none -
fig|720555.3.peg.432	CDS	Contig8	439844	440215	2	+	372	Transcriptional regulator, GntR family	- none -
fig|720555.3.peg.433	CDS	Contig8	440212	440910	1	+	699	ABC transporter, ATP-binding protein	- none -
fig|720555.3.peg.434	CDS	Contig8	440927	441844	2	+	918	ABC transporter, ATP-binding protein	- none -
fig|720555.3.peg.435	CDS	Contig8	441837	442787	3	+	951	putative membrane protein	- none -
fig|720555.3.peg.436	CDS	Contig8	443080	442880	-1	-	201	Cold shock protein CspD	Cold shock, CspA family of proteins
fig|720555.3.peg.437	CDS	Contig8	443999	444838	2	+	840	Methionine ABC transporter substrate-binding protein	Methionine Biosynthesis; <br>Methionine Degradation
fig|720555.3.peg.438	CDS	Contig8	445920	444841	-3	-	1080	GGDEF domain protein	- none -
fig|720555.3.peg.439	CDS	Contig8	446094	447488	3	+	1395	L-cystine uptake protein TcyP	- none -
fig|720555.3.peg.440	CDS	Contig8	447911	447525	-2	-	387	hypothetical protein	- none -
fig|720555.3.peg.441	CDS	Contig8	447900	448034	3	+	135	hypothetical protein	- none -
fig|720555.3.peg.442	CDS	Contig8	448086	448670	3	+	585	Lipoprotein yhcN precursor	- none -
fig|720555.3.peg.443	CDS	Contig8	448789	449883	1	+	1095	hypothetical protein	- none -
fig|720555.3.peg.444	CDS	Contig8	450348	449692	-3	-	657	hypothetical protein	- none -
fig|720555.3.peg.445	CDS	Contig8	450528	454076	3	+	3549	Chemotaxis protein methyltransferase CheR (EC 2.1.1.80)	Bacterial Chemotaxis
fig|720555.3.peg.446	CDS	Contig8	454191	457763	3	+	3573	Endonuclease yhcR precursor (EC 3.1.31.-)	- none -
fig|720555.3.peg.447	CDS	Contig8	457760	458353	2	+	594	hypothetical protein	- none -
fig|720555.3.peg.448	CDS	Contig8	459303	458392	-3	-	912	Similar to ribosomal large subunit pseudouridine synthase D, Bacillus subtilis YhcT type	Ribosome biogenesis bacterial
fig|720555.3.peg.449	CDS	Contig8	459414	459809	3	+	396	unknown	- none -
fig|720555.3.peg.450	CDS	Contig8	459954	460376	3	+	423	hypothetical protein	- none -
fig|720555.3.peg.451	CDS	Contig8	460504	461166	1	+	663	hydrolase, haloacid dehalogenase-like family	- none -
fig|720555.3.peg.452	CDS	Contig8	461185	462723	1	+	1539	Carbon-nitrogen hydrolase	- none -
fig|720555.3.peg.453	CDS	Contig8	462848	463759	2	+	912	hypothetical protein	- none -
fig|720555.3.peg.454	CDS	Contig8	463735	463869	1	+	135	hypothetical protein	- none -
fig|720555.3.peg.455	CDS	Contig8	463950	465281	3	+	1332	Adenosylmethionine-8-amino-7-oxononanoate aminotransferase (EC 2.6.1.62)	Biotin biosynthesis
fig|720555.3.peg.456	CDS	Contig8	465318	465893	3	+	576	Glycerol uptake operon antiterminator regulatory protein	Glycerol and Glycerol-3-phosphate Uptake and Utilization
fig|720555.3.peg.457	CDS	Contig8	466069	466893	1	+	825	Glycerol uptake facilitator protein	Glycerol fermenation to 1,3-propanediol; <br>Osmoregulation; <br>Glycerol and Glycerol-3-phosphate Uptake and Utilization
fig|720555.3.peg.458	CDS	Contig8	466910	468400	2	+	1491	Glycerol kinase (EC 2.7.1.30)	Glycerolipid and Glycerophospholipid Metabolism in Bacteria; <br>Glycerol and Glycerol-3-phosphate Uptake and Utilization
fig|720555.3.peg.459	CDS	Contig8	468543	470207	3	+	1665	Aerobic glycerol-3-phosphate dehydrogenase (EC 1.1.5.3)	Glycerolipid and Glycerophospholipid Metabolism in Bacteria; <br>Respiratory dehydrogenases 1; <br>Glycerol and Glycerol-3-phosphate Uptake and Utilization
fig|720555.3.peg.460	CDS	Contig8	470374	472122	1	+	1749	Phosphomannomutase (EC 5.4.2.8)	Mannose Metabolism
fig|720555.3.peg.461	CDS	Contig8	472263	473405	3	+	1143	Nitrate/nitrite sensor protein (EC 2.7.3.-)	Nitrate and nitrite ammonification
fig|720555.3.peg.462	CDS	Contig8	473405	474052	2	+	648	DNA-binding response regulator	- none -
fig|720555.3.peg.463	CDS	Contig8	474049	474573	1	+	525	Azoreductase	- none -
fig|720555.3.peg.464	CDS	Contig8	474831	474589	-3	-	243	unknown	- none -
fig|720555.3.peg.465	CDS	Contig8	475039	475362	1	+	324	unknown	- none -
fig|720555.3.peg.466	CDS	Contig8	476819	475410	-2	-	1410	Gamma-D-glutamyl-meso-diaminopimelate peptidase (EC 3.4.19.11)	- none -
fig|720555.3.peg.467	CDS	Contig8	477466	477035	-1	-	432	Nitrite-sensitive transcriptional repressor NsrR	Nitrosative stress; <br>Flavohaemoglobin; <br>Rrf2 family transcriptional regulators; <br>Oxidative stress
fig|720555.3.peg.468	CDS	Contig8	479133	477589	-3	-	1545	hypothetical protein	- none -
fig|720555.3.peg.469	CDS	Contig8	479325	480731	3	+	1407	Stage V sporulation protein involved in spore cortex synthesis (SpoVR)	Sporulation gene orphans
fig|720555.3.peg.470	CDS	Contig8	482148	480772	-3	-	1377	Alkaline phosphatase (EC 3.1.3.1)	Phosphate metabolism
fig|720555.3.peg.471	CDS	Contig8	482245	482409	1	+	165	hypothetical protein	- none -
fig|720555.3.peg.472	CDS	Contig8	482732	483565	2	+	834	cell wall lytic activity	- none -
fig|720555.3.peg.473	CDS	Contig8	484518	483646	-3	-	873	negative regulation of the citrate synthase I gene (citA)	- none -
fig|720555.3.peg.474	CDS	Contig8	484628	485716	2	+	1089	Citrate synthase (si) (EC 2.3.3.1)	Biogenesis of c-type cytochromes; <br>TCA Cycle
fig|720555.3.peg.475	CDS	Contig8	485799	486668	3	+	870	oxidoreductase, short chain dehydrogenase/reductase family	- none -
fig|720555.3.peg.476	CDS	Contig8	486924	488327	3	+	1404	hypothetical protein	- none -
fig|720555.3.peg.477	CDS	Contig8	488454	489803	3	+	1350	sodium-dependent transporter	- none -
fig|720555.3.peg.478	CDS	Contig8	490273	490043	-1	-	231	Predicted transcriptional regulator of pyridoxine metabolism	Pyridoxin (Vitamin B6) Biosynthesis
fig|720555.3.peg.479	CDS	Contig8	490382	490810	2	+	429	unknown	- none -
fig|720555.3.peg.480	CDS	Contig8	492292	490865	-1	-	1428	Arginine permease RocE	Arginine and Ornithine Degradation
fig|720555.3.peg.481	CDS	Contig8	494050	492305	-1	-	1746	Arginine utilization protein RocB	Arginine and Ornithine Degradation
fig|720555.3.peg.482	CDS	Contig8	495693	494146	-3	-	1548	Delta-1-pyrroline-5-carboxylate dehydrogenase (EC 1.5.1.12)	Proline, 4-hydroxyproline uptake and utilization; <br>Arginine and Ornithine Degradation
fig|720555.3.peg.483	CDS	Contig8	497185	495905	-1	-	1281	NAD-specific glutamate dehydrogenase (EC 1.4.1.2)	Glutamate dehydrogenases; <br>Glutamine, Glutamate, Aspartate and Asparagine Biosynthesis
fig|720555.3.peg.484	CDS	Contig8	497696	497406	-2	-	291	Hypothetical protein DUF194, DegV family	- none -
fig|720555.3.peg.485	CDS	Contig8	498757	497684	-1	-	1074	Sigma-M negative effector	- none -
fig|720555.3.peg.486	CDS	Contig8	499241	498750	-2	-	492	RNA polymerase sigma-70 factor	- none -
fig|720555.3.peg.487	CDS	Contig8	499443	500438	3	+	996	putative aldo/keto reductase	- none -
fig|720555.3.peg.488	CDS	Contig8	500580	501179	3	+	600	1-acyl-sn-glycerol-3-phosphate acyltransferase (EC 2.3.1.51)	Glycerolipid and Glycerophospholipid Metabolism in Bacteria; <br>Phosphate metabolism
fig|720555.3.peg.489	CDS	Contig8	501429	502553	3	+	1125	D-amino acid dehydrogenase small subunit (EC 1.4.99.1)	Proline, 4-hydroxyproline uptake and utilization; <br>Pyruvate Alanine Serine Interconversions; <br>Respiratory dehydrogenases 1
fig|720555.3.peg.490	CDS	Contig8	503588	502680	-2	-	909	UDP-glucose 4-epimerase (EC 5.1.3.2)	N-linked Glycosylation in Bacteria; <br>Lactose and Galactose Uptake and Utilization; <br>Rhamnose containing glycans
fig|720555.3.peg.491	CDS	Contig8	505417	504083	-1	-	1335	Hemolysins and related proteins containing CBS domains	- none -
fig|720555.3.peg.492	CDS	Contig8	505906	505478	-1	-	429	HTH-type transcriptional regulator cueR	- none -
fig|720555.3.peg.493	CDS	Contig8	506058	506204	3	+	147	hypothetical protein	- none -
fig|720555.3.peg.494	CDS	Contig8	506383	507771	1	+	1389	Hemolysins and related proteins containing CBS domains	- none -
fig|720555.3.peg.495	CDS	Contig8	507971	507822	-2	-	150	hypothetical protein	- none -
fig|720555.3.peg.496	CDS	Contig8	508359	508003	-3	-	357	camphor resistance protein CrcB	- none -
fig|720555.3.peg.497	CDS	Contig8	508751	508356	-2	-	396	Protein crcB homolog 2	- none -
fig|720555.3.peg.498	CDS	Contig8	509469	508738	-3	-	732	Glycerophosphoryl diester phosphodiesterase (EC 3.1.4.46)	Glycerol and Glycerol-3-phosphate Uptake and Utilization
fig|720555.3.peg.499	CDS	Contig8	509627	509818	2	+	192	hypothetical protein	- none -
fig|720555.3.peg.500	CDS	Contig8	509977	511092	1	+	1116	hypothetical protein	- none -
fig|720555.3.peg.501	CDS	Contig8	511174	511917	1	+	744	NAD-dependent protein deacetylase of SIR2 family	Pyruvate metabolism II: acetyl-CoA, acetogenesis from pyruvate; <br>NAD and NADP cofactor biosynthesis global; <br>Redox-dependent regulation of nucleus processes
fig|720555.3.peg.502	CDS	Contig8	512793	511945	-3	-	849	polysaccharide deacetylase	- none -
fig|720555.3.peg.503	CDS	Contig8	513092	513946	2	+	855	D-alanine aminotransferase (EC 2.6.1.21)	Pyruvate Alanine Serine Interconversions
fig|720555.3.peg.504	CDS	Contig8	515347	513986	-1	-	1362	Na+/H+ antiporter NhaC	- none -
fig|720555.3.peg.505	CDS	Contig8	515975	515475	-2	-	501	Stress response protein nhaX	- none -
fig|720555.3.peg.506	CDS	Contig8	516436	518193	1	+	1758	ABC transporter, ATP-binding/permease protein	- none -
fig|720555.3.peg.507	CDS	Contig8	518190	520211	3	+	2022	ABC transporter, ATP-binding/permease protein	- none -
fig|720555.3.peg.508	CDS	Contig8	520880	520260	-2	-	621	oxidoreductase, putative	- none -
fig|720555.3.peg.509	CDS	Contig8	521367	521155	-3	-	213	Small acid-soluble spore protein, beta-type SASP	Small acid-soluble spore proteins
fig|720555.3.peg.510	CDS	Contig8	521792	521583	-2	-	210	hypothetical protein	- none -
fig|720555.3.peg.511	CDS	Contig8	523321	521963	-1	-	1359	hypothetical protein	- none -
fig|720555.3.peg.512	CDS	Contig8	524402	523311	-2	-	1092	hypothetical protein	- none -
fig|720555.3.peg.513	CDS	Contig8	524401	524583	1	+	183	hypothetical protein	- none -
fig|720555.3.peg.514	CDS	Contig8	524701	525834	1	+	1134	Hypothetical protein SAV1846	- none -
fig|720555.3.peg.515	CDS	Contig8	525925	526278	1	+	354	Hypothetical protein SAV1845	- none -
fig|720555.3.peg.516	CDS	Contig8	527420	526347	-2	-	1074	DNA alkylation repair enzyme	- none -
fig|720555.3.peg.517	CDS	Contig8	527892	528758	3	+	867	Hydrolase, haloacid dehalogenase-like family	- none -
fig|720555.3.peg.518	CDS	Contig8	528886	530388	1	+	1503	Coproporphyrinogen III oxidase, oxygen-independent (EC 1.3.99.22)	Heme and Siroheme Biosynthesis
fig|720555.3.peg.519	CDS	Contig8	530495	531784	2	+	1290	Siderophore biosynthesis protein, monooxygenase	- none -
fig|720555.3.peg.520	CDS	Contig8	533034	531814	-3	-	1221	hypothetical protein	- none -
fig|720555.3.peg.521	CDS	Contig8	533539	533042	-1	-	498	TrkA C-terminal domain protein	- none -
fig|720555.3.peg.522	CDS	Contig8	533931	533617	-3	-	315	Uncharacterized protein yhaS	- none -
fig|720555.3.peg.523	CDS	Contig8	534003	534119	3	+	117	hypothetical protein	- none -
fig|720555.3.peg.524	CDS	Contig8	534120	534887	3	+	768	enoyl-CoA hydratase/isomerase family protein	- none -
fig|720555.3.peg.525	CDS	Contig8	535114	534929	-1	-	186	FIG012187: hypothetical protein	- none -
fig|720555.3.peg.526	CDS	Contig8	535231	536127	1	+	897	ABC transporter, ATP-binding protein	- none -
fig|720555.3.peg.527	CDS	Contig8	536120	537382	2	+	1263	ABC transporter, permease protein (putative)	- none -
fig|720555.3.peg.528	CDS	Contig8	537516	538742	3	+	1227	DNA repair exonuclease family protein YhaO	DNA repair, bacterial
fig|720555.3.peg.529	CDS	Contig8	538756	541632	1	+	2877	DNA double-strand break repair rad50 ATPase	- none -
fig|720555.3.peg.530	CDS	Contig8	541704	542648	3	+	945	3&#39;-5&#39; exoribonuclease yhaM (EC 3.1.-.-)	- none -
fig|720555.3.peg.531	CDS	Contig8	542786	543016	2	+	231	hypothetical protein	- none -
fig|720555.3.peg.532	CDS	Contig8	543907	543053	-1	-	855	Foldase protein PrsA precursor (EC 5.2.1.8) @ Foldase clustered with pyrimidine conversion	Peptidyl-prolyl cis-trans isomerase
fig|720555.3.peg.533	CDS	Contig8	544642	544424	-1	-	219	hypothetical protein	- none -
fig|720555.3.peg.534	CDS	Contig8	545234	544716	-2	-	519	Hypothetical protein SAV1840	- none -
fig|720555.3.peg.535	CDS	Contig8	545454	545786	3	+	333	hypothetical protein	- none -
fig|720555.3.peg.536	CDS	Contig8	546394	545783	-1	-	612	Protease production regulatory protein Hpr (ScoC)	- none -
fig|720555.3.peg.537	CDS	Contig8	546966	546574	-3	-	393	Hypothetical protein SAV1839	- none -
fig|720555.3.peg.538	CDS	Contig8	547062	547253	3	+	192	hypothetical protein; RBL05590	- none -
fig|720555.3.peg.539	CDS	Contig8	547850	547335	-2	-	516	Substrate-specific component TrpP of tryptophan ECF transporter	ECF class transporters
fig|720555.3.peg.540	CDS	Contig8	547855	548007	1	+	153	hypothetical protein	- none -
fig|720555.3.peg.541	CDS	Contig8	549058	547976	-1	-	1083	Phosphoserine aminotransferase (EC 2.6.1.52)	Glycine and Serine Utilization; <br>Pyridoxin (Vitamin B6) Biosynthesis; <br>Serine Biosynthesis
fig|720555.3.peg.542	CDS	Contig8	549640	549203	-1	-	438	Histidine triad (HIT) nucleotide-binding protein, similarity with At5g48545 and yeast YDL125C (HNT1)	- none -
fig|720555.3.peg.543	CDS	Contig8	550087	549941	-1	-	147	hypothetical protein	- none -
fig|720555.3.peg.544	CDS	Contig8	550140	550883	3	+	744	ABC transporter, ATP-binding protein EcsA	- none -
fig|720555.3.peg.545	CDS	Contig8	550876	552102	1	+	1227	ABC transporter, permease protein EscB	- none -
fig|720555.3.peg.546	CDS	Contig8	552164	552874	2	+	711	EcsC protein	- none -
fig|720555.3.peg.547	CDS	Contig8	554080	552890	-1	-	1191	Catalyzes the cleavage of p-aminobenzoyl-glutamate to p-aminobenzoate and glutamate, subunit A	- none -
fig|720555.3.peg.548	CDS	Contig8	554159	554046	-2	-	114	hypothetical protein	- none -
fig|720555.3.peg.549	CDS	Contig8	555553	554156	-1	-	1398	unknown	- none -
fig|720555.3.peg.550	CDS	Contig8	556198	555698	-1	-	501	Uncharacterized protein, homolog of B.subtilis yhgC	- none -
fig|720555.3.peg.551	CDS	Contig8	556320	558461	3	+	2142	Multimodular transpeptidase-transglycosylase (EC 2.4.1.129) (EC 3.4.-.-)	Peptidoglycan Biosynthesis
fig|720555.3.peg.552	CDS	Contig8	558583	559638	1	+	1056	Uroporphyrinogen III decarboxylase (EC 4.1.1.37)	Heme and Siroheme Biosynthesis
fig|720555.3.peg.553	CDS	Contig8	559709	560641	2	+	933	Ferrochelatase, protoheme ferro-lyase (EC 4.99.1.1)	Biogenesis of c-type cytochromes; <br>Heme and Siroheme Biosynthesis
fig|720555.3.peg.554	CDS	Contig8	560663	562075	2	+	1413	Protoporphyrinogen IX oxidase, aerobic (EC 1.3.3.4)	Heme and Siroheme Biosynthesis
fig|720555.3.peg.555	CDS	Contig8	562249	562821	1	+	573	Transcriptional regulator, TetR family	- none -
fig|720555.3.peg.556	CDS	Contig8	562894	565221	1	+	2328	hypothetical protein	- none -
fig|720555.3.peg.557	CDS	Contig8	566252	565275	-2	-	978	3-oxoacyl-[acyl-carrier-protein] synthase, KASIII (EC 2.3.1.41)	Fatty Acid Biosynthesis FASII
fig|720555.3.peg.558	CDS	Contig8	566448	566305	-3	-	144	hypothetical protein	- none -
fig|720555.3.peg.559	CDS	Contig8	566631	566515	-3	-	117	hypothetical protein	- none -
fig|720555.3.peg.560	CDS	Contig8	566594	566707	2	+	114	hypothetical protein	- none -
fig|720555.3.peg.561	CDS	Contig8	566849	567889	2	+	1041	Deblocking aminopeptidase (EC 3.4.11.-)	Protein degradation
fig|720555.3.peg.562	CDS	Contig8	569276	567987	-2	-	1290	Proton/glutamate symport protein @ Sodium/glutamate symport protein	ZZ gjo need homes; <br>ZZ gjo need homes
fig|720555.3.peg.563	CDS	Contig8	569695	569561	-1	-	135	unknown	- none -
fig|720555.3.peg.564	CDS	Contig8	569853	570587	3	+	735	Metal-dependent hydrolase (EC 3.-.-.-)	- none -
fig|720555.3.peg.565	CDS	Contig8	570600	571595	3	+	996	Lipoate-protein ligase A	Lipoic acid metabolism; <br>Dehydrogenase complexes; <br>Glycine cleavage system
fig|720555.3.peg.566	CDS	Contig8	571682	572326	2	+	645	Conserved protein YhfK	- none -
fig|720555.3.peg.567	CDS	Contig8	572419	574002	1	+	1584	Long-chain-fatty-acid--CoA ligase (EC 6.2.1.3)	Biotin biosynthesis
fig|720555.3.peg.568	CDS	Contig8	574453	574058	-1	-	396	hypothetical protein	- none -
fig|720555.3.peg.569	CDS	Contig8	574658	575950	2	+	1293	peptidase, M48 family	- none -
fig|720555.3.peg.570	CDS	Contig8	577138	575990	-1	-	1149	serine protease	- none -
fig|720555.3.peg.571	CDS	Contig8	577570	578022	1	+	453	Histone acetyltransferase HPA2 and related acetyltransferases	- none -
fig|720555.3.peg.572	CDS	Contig8	578094	579086	3	+	993	Alcohol dehydrogenase (EC 1.1.1.1)	Glycerolipid and Glycerophospholipid Metabolism in Bacteria; <br>Fermentations: Lactate
fig|720555.3.peg.573	CDS	Contig8	579263	580225	2	+	963	Heme ABC type transporter HtsABC, heme-binding protein	Flavohaemoglobin; <br>Heme, hemin uptake and utilization systems in GramPositives
fig|720555.3.peg.574	CDS	Contig8	580302	581339	3	+	1038	Heme ABC type transporter HtsABC, permease protein HtsB	Heme, hemin uptake and utilization systems in GramPositives
fig|720555.3.peg.575	CDS	Contig8	581336	582343	2	+	1008	Heme ABC type transporter HtsABC, permease protein HtsC	Heme, hemin uptake and utilization systems in GramPositives
fig|720555.3.peg.576	CDS	Contig8	582950	582372	-2	-	579	Predicted broad substrate specificity phosphatase	- none -
fig|720555.3.peg.577	CDS	Contig8	583147	583028	-1	-	120	hypothetical protein	- none -
fig|720555.3.peg.578	CDS	Contig8	584057	585772	2	+	1716	Butyryl-CoA dehydrogenase (EC 1.3.99.2)	Butanol Biosynthesis; <br>Isoleucine degradation; <br>Isoleucine degradation; <br>Valine degradation; <br>Acetyl-CoA fermentation to Butyrate; <br>Anaerobic respiratory reductases
fig|720555.3.peg.579	CDS	Contig8	585788	586672	2	+	885	3-hydroxyisobutyrate dehydrogenase (EC 1.1.1.31)	Valine degradation
fig|720555.3.peg.580	CDS	Contig8	586694	588148	2	+	1455	Methylmalonate-semialdehyde dehydrogenase (EC 1.2.1.27)	Inositol catabolism; <br>Valine degradation
fig|720555.3.peg.581	CDS	Contig8	588244	589032	1	+	789	3-hydroxyisobutyryl-CoA hydrolase (EC 3.1.2.4)	Valine degradation
fig|720555.3.peg.582	CDS	Contig8	589048	590109	1	+	1062	3-hydroxyisobutyryl-CoA hydrolase (EC 3.1.2.4)	Valine degradation
fig|720555.3.peg.583	CDS	Contig8	590354	590232	-2	-	123	hypothetical protein	- none -
fig|720555.3.peg.584	CDS	Contig8	591812	590514	-2	-	1299	methyl-accepting chemotaxis protein	- none -
fig|720555.3.peg.585	CDS	Contig8	593503	591971	-1	-	1533	oxidoreductase	- none -
fig|720555.3.peg.586	CDS	Contig8	593675	593556	-2	-	120	hypothetical protein	- none -
fig|720555.3.peg.587	CDS	Contig8	593637	594494	3	+	858	oxidoreductase, short chain dehydrogenase/reductase family	- none -
fig|720555.3.peg.588	CDS	Contig8	594758	594525	-2	-	234	unknown	- none -
fig|720555.3.peg.589	CDS	Contig8	595085	595660	2	+	576	Competence transcription factor	- none -
fig|720555.3.peg.590	CDS	Contig8	595878	596150	3	+	273	Uncharacterized protein yhjA precursor	- none -
fig|720555.3.peg.591	CDS	Contig8	597664	596177	-1	-	1488	Na+/solute symporter	- none -
fig|720555.3.peg.592	CDS	Contig8	597861	597661	-3	-	201	hypothetical protein	- none -
fig|720555.3.peg.593	CDS	Contig8	598354	597989	-1	-	366	hypothetical protein	- none -
fig|720555.3.peg.594	CDS	Contig8	598509	599132	3	+	624	Alkaline phosphatase like protein	Phosphate metabolism
fig|720555.3.peg.595	CDS	Contig8	599135	599635	2	+	501	Signal peptidase I (EC 3.4.21.89)	CBSS-176299.4.peg.1292; <br>Signal peptidase
fig|720555.3.peg.596	CDS	Contig8	599839	601326	1	+	1488	hypothetical protein	- none -
fig|720555.3.peg.597	CDS	Contig8	601410	601940	3	+	531	hypothetical protein	- none -
fig|720555.3.peg.598	CDS	Contig8	603147	601999	-3	-	1149	hypothetical protein	- none -
fig|720555.3.peg.599	CDS	Contig8	603238	603357	1	+	120	hypothetical protein	- none -
fig|720555.3.peg.600	CDS	Contig8	603417	603578	3	+	162	hypothetical protein	- none -
fig|720555.3.peg.601	CDS	Contig8	604214	603777	-2	-	438	hypothetical protein	- none -
fig|720555.3.peg.602	CDS	Contig8	604420	607920	1	+	3501	ATP-dependent nuclease, subunit B	ATP-dependent Nuclease
fig|720555.3.peg.603	CDS	Contig8	607907	611611	2	+	3705	ATP-dependent nuclease, subunit A	ATP-dependent Nuclease
fig|720555.3.peg.604	CDS	Contig8	611682	612860	3	+	1179	Exonuclease SbcD	DNA repair, bacterial
fig|720555.3.peg.605	CDS	Contig8	612857	616249	2	+	3393	Exonuclease SbcC	DNA repair, bacterial
fig|720555.3.peg.606	CDS	Contig8	616266	616568	3	+	303	hypothetical protein	- none -
fig|720555.3.peg.607	CDS	Contig8	616823	616605	-2	-	219	Protein GerPF, required for proper assembly of spore coat, mutations lead to super-dormant spore	Spore germination
fig|720555.3.peg.608	CDS	Contig8	617258	616863	-2	-	396	Protein GerPE, required for proper assembly of spore coat, mutations lead to super-dormant spore	Spore germination
fig|720555.3.peg.609	CDS	Contig8	617437	617261	-1	-	177	Protein GerPD, required for proper assembly of spore coat, mutations lead to super-dormant spore	Spore germination
fig|720555.3.peg.610	CDS	Contig8	618051	617434	-3	-	618	Protein GerPC, required for proper assembly of spore coat, mutations lead to super-dormant spore	Spore germination
fig|720555.3.peg.611	CDS	Contig8	618315	618085	-3	-	231	Protein GerPB, required for proper assembly of spore coat, mutations lead to super-dormant spore	Spore germination
fig|720555.3.peg.612	CDS	Contig8	618552	618331	-3	-	222	Protein GerPA, required for proper assembly of spore coat, mutations lead to super-dormant spore	Spore germination
fig|720555.3.peg.613	CDS	Contig8	618687	619874	3	+	1188	hypothetical protein	- none -
fig|720555.3.peg.614	CDS	Contig8	620010	619837	-3	-	174	Uncharacterized protein yisI	- none -
fig|720555.3.peg.615	CDS	Contig8	621145	620159	-1	-	987	hypothetical protein	- none -
fig|720555.3.peg.616	CDS	Contig8	621322	622227	1	+	906	Fumarylacetoacetate hydrolase family protein	Gentisare degradation; <br>Salicylate and gentisate catabolism
fig|720555.3.peg.617	CDS	Contig8	622324	622680	1	+	357	Uncharacterized protein UPF0344	- none -
fig|720555.3.peg.618	CDS	Contig8	622879	625581	1	+	2703	DNA topoisomerase I (EC 5.99.1.2)	Conserved gene cluster associated with Met-tRNA formyltransferase
fig|720555.3.peg.619	CDS	Contig8	626187	625618	-3	-	570	Uncharacterized protein yisN, only in Bacillus	- none -
fig|720555.3.peg.620	CDS	Contig8	626363	628204	2	+	1842	Asparagine synthetase [glutamine-hydrolyzing] (EC 6.3.5.4) YisO	- none -
fig|720555.3.peg.621	CDS	Contig8	628341	629183	3	+	843	Phytoene synthase (EC 2.5.1.32)	- none -
fig|720555.3.peg.622	CDS	Contig8	630561	629194	-3	-	1368	Na+ driven multidrug efflux pump	- none -
fig|720555.3.peg.623	CDS	Contig8	630684	631547	3	+	864	Transcriptional regulator, AraC family	- none -
fig|720555.3.peg.624	CDS	Contig8	631673	632617	2	+	945	Heme O synthase, protoheme IX farnesyltransferase (EC 2.5.1.-) COX10-CtaB	Flavohaemoglobin; <br>Biogenesis of cytochrome c oxidases
fig|720555.3.peg.625	CDS	Contig8	632624	633757	2	+	1134	Predicted transcriptional regulator of the myo-inositol catabolic operon	Inositol catabolism
fig|720555.3.peg.626	CDS	Contig8	634020	635048	3	+	1029	Myo-inositol 2-dehydrogenase like (EC 1.1.1.18)	- none -
fig|720555.3.peg.627	CDS	Contig8	635093	635206	2	+	114	hypothetical protein	- none -
fig|720555.3.peg.628	CDS	Contig8	635203	635370	1	+	168	hypothetical protein	- none -
fig|720555.3.peg.629	CDS	Contig8	635367	635492	3	+	126	hypothetical protein	- none -
fig|720555.3.peg.630	CDS	Contig8	636056	635556	-2	-	501	hypothetical protein	- none -
fig|720555.3.peg.631	CDS	Contig8	636518	636210	-2	-	309	Transporter, LysE family	- none -
fig|720555.3.peg.632	CDS	Contig8	636536	636655	2	+	120	Transcriptional regulator, GntR family / Aspartate aminotransferase (EC 2.6.1.1)	Proline, 4-hydroxyproline uptake and utilization; <br>Methionine Salvage; <br>Threonine and Homoserine Biosynthesis; <br>Glutamine, Glutamate, Aspartate and Asparagine Biosynthesis
fig|720555.3.peg.633	CDS	Contig8	636661	637065	1	+	405	hypothetical protein	- none -
fig|720555.3.peg.634	CDS	Contig8	637835	637197	-2	-	639	hypothetical protein	- none -
fig|720555.3.peg.635	CDS	Contig8	637956	638135	3	+	180	hypothetical protein	- none -
fig|720555.3.peg.636	CDS	Contig8	638202	639005	3	+	804	hypothetical protein	- none -
fig|720555.3.peg.637	CDS	Contig8	639650	639051	-2	-	600	Adenylylsulfate kinase (EC 2.7.1.25)	Inorganic Sulfur Assimilation; <br>Cysteine Biosynthesis
fig|720555.3.peg.638	CDS	Contig8	640815	639640	-3	-	1176	Sulfate adenylyltransferase, dissimilatory-type (EC 2.7.7.4)	Inorganic Sulfur Assimilation
fig|720555.3.peg.639	CDS	Contig8	641581	640871	-1	-	711	Phosphoadenylyl-sulfate reductase [thioredoxin] (EC 1.8.4.8) / Adenylyl-sulfate reductase [thioredoxin] (EC 1.8.4.10)	Inorganic Sulfur Assimilation; <br>Inorganic Sulfur Assimilation; <br>Cysteine Biosynthesis
fig|720555.3.peg.640	CDS	Contig8	641791	642483	1	+	693	hypothetical protein	- none -
fig|720555.3.peg.641	CDS	Contig8	642480	643238	3	+	759	Phosphosulfolactate synthase (EC 4.4.1.19)	- none -
fig|720555.3.peg.642	CDS	Contig8	643907	643296	-2	-	612	membrane protein, putative	- none -
fig|720555.3.peg.643	CDS	Contig8	645108	643993	-3	-	1116	putative mandelate racemase	- none -
fig|720555.3.peg.644	CDS	Contig8	646375	645119	-1	-	1257	multidrug resistance protein	- none -
fig|720555.3.peg.645	CDS	Contig8	647363	646509	-2	-	855	hypothetical protein	- none -
fig|720555.3.peg.646	CDS	Contig8	647817	647377	-3	-	441	acetyltransferase, GNAT family	- none -
fig|720555.3.peg.647	CDS	Contig8	649769	647931	-2	-	1839	5,10-methylenetetrahydrofolate reductase (EC 1.5.1.20) / Homolog of homocysteine-binding domain	Methionine Biosynthesis; <br>One-carbon metabolism by tetrahydropterines
fig|720555.3.peg.648	CDS	Contig8	650592	650101	-3	-	492	UPF0234 protein YajQ	Broadly distributed proteins not in subsystems
fig|720555.3.peg.649	CDS	Contig8	650743	651591	1	+	849	S1 RNA binding domain	- none -
fig|720555.3.peg.650	CDS	Contig8	651685	651846	1	+	162	hypothetical protein	- none -
fig|720555.3.peg.651	CDS	Contig8	651843	652067	3	+	225	hypothetical protein	- none -
fig|720555.3.peg.652	CDS	Contig8	652096	652389	1	+	294	hypothetical protein	- none -
fig|720555.3.peg.653	CDS	Contig8	652477	652653	1	+	177	hypothetical protein	- none -
fig|720555.3.peg.654	CDS	Contig8	653550	652696	-3	-	855	DegV family protein	- none -
fig|720555.3.peg.655	CDS	Contig8	653688	654530	3	+	843	membrane protein	- none -
fig|720555.3.peg.656	CDS	Contig8	654549	655001	3	+	453	intracellular proteinase inhibitor BsuPI	- none -
fig|720555.3.peg.657	CDS	Contig8	655230	655033	-3	-	198	hypothetical protein	- none -
fig|720555.3.peg.658	CDS	Contig8	655379	655230	-2	-	150	hypothetical protein	- none -
fig|720555.3.peg.659	CDS	Contig8	656279	655467	-2	-	813	FIG002540: Haloacid dehalogenase-like hydrolase	- none -
fig|720555.3.peg.660	CDS	Contig8	656400	657167	3	+	768	Putative hydrolase of the alpha/beta superfamily	- none -
fig|720555.3.peg.661	CDS	Contig8	657230	657538	2	+	309	probably aromatic ring hydroxylating enzyme, evidenced by COGnitor; PaaD-like protein (DUF59) involved in Fe-S cluster assembly	- none -
fig|720555.3.peg.662	CDS	Contig8	657604	657771	1	+	168	hypothetical protein	- none -
fig|720555.3.peg.663	CDS	Contig8	657832	659268	1	+	1437	oxidoreductase, FAD-binding	- none -
fig|720555.3.peg.664	CDS	Contig8	659265	659807	3	+	543	YitZ	- none -
fig|720555.3.peg.665	CDS	Contig8	660043	661080	1	+	1038	N-acetyl-gamma-glutamyl-phosphate reductase (EC 1.2.1.38)	Arginine Biosynthesis extended
fig|720555.3.peg.666	CDS	Contig8	661101	662321	3	+	1221	Glutamate N-acetyltransferase (EC 2.3.1.35) / N-acetylglutamate synthase (EC 2.3.1.1)	Arginine Biosynthesis extended; <br>Arginine Biosynthesis extended
fig|720555.3.peg.667	CDS	Contig8	662335	663111	1	+	777	Acetylglutamate kinase (EC 2.7.2.8)	Arginine Biosynthesis extended
fig|720555.3.peg.668	CDS	Contig8	663108	664265	3	+	1158	Acetylornithine aminotransferase (EC 2.6.1.11)	Arginine Biosynthesis extended
fig|720555.3.peg.669	CDS	Contig8	664336	665397	1	+	1062	Carbamoyl-phosphate synthase small chain (EC 6.3.5.5)	De Novo Pyrimidine Synthesis
fig|720555.3.peg.670	CDS	Contig8	665390	668482	2	+	3093	Carbamoyl-phosphate synthase large chain (EC 6.3.5.5)	De Novo Pyrimidine Synthesis
fig|720555.3.peg.671	CDS	Contig8	668470	669423	1	+	954	Ornithine carbamoyltransferase (EC 2.1.3.3)	Arginine and Ornithine Degradation; <br>Arginine Biosynthesis extended; <br>Arginine Deiminase Pathway
fig|720555.3.peg.672	CDS	Contig8	669522	669701	3	+	180	hypothetical protein	- none -
fig|720555.3.peg.673	CDS	Contig8	669919	669731	-1	-	189	hypothetical protein	- none -
fig|720555.3.peg.674	CDS	Contig8	670179	670913	3	+	735	Hydrolase (HAD superfamily)	- none -
fig|720555.3.peg.675	CDS	Contig8	671001	671576	3	+	576	unknown	- none -
fig|720555.3.peg.676	CDS	Contig8	671666	672619	2	+	954	positive regulator of comK	- none -
fig|720555.3.peg.677	CDS	Contig8	672634	672825	1	+	192	unknown	- none -
fig|720555.3.peg.678	CDS	Contig8	673082	672855	-2	-	228	unknown	- none -
fig|720555.3.peg.679	CDS	Contig8	673254	674192	3	+	939	3-oxoacyl-[acyl-carrier-protein] synthase, KASIII (EC 2.3.1.41)	Fatty Acid Biosynthesis FASII
fig|720555.3.peg.680	CDS	Contig8	674214	675452	3	+	1239	3-oxoacyl-[acyl-carrier-protein] synthase, KASII (EC 2.3.1.41)	Fatty Acid Biosynthesis FASII
fig|720555.3.peg.681	CDS	Contig8	675530	676315	2	+	786	hypothetical protein	- none -
fig|720555.3.peg.682	CDS	Contig8	676505	676984	2	+	480	Oligopeptide transport ATP-binding protein OppD (TC 3.A.1.5.1)	- none -
fig|720555.3.peg.683	CDS	Contig8	676996	677490	1	+	495	Oligopeptide transport ATP-binding protein OppD (TC 3.A.1.5.1)	- none -
fig|720555.3.peg.684	CDS	Contig8	677487	678476	3	+	990	Oligopeptide transport ATP-binding protein OppF (TC 3.A.1.5.1)	- none -
fig|720555.3.peg.685	CDS	Contig8	678575	680200	2	+	1626	Oligopeptide ABC transporter, periplasmic oligopeptide-binding protein OppA (TC 3.A.1.5.1)	- none -
fig|720555.3.peg.686	CDS	Contig8	680275	681225	1	+	951	Oligopeptide transport system permease protein OppB (TC 3.A.1.5.1)	- none -
fig|720555.3.peg.687	CDS	Contig8	681244	682158	1	+	915	oligopeptide ABC transporter (permease)	- none -
fig|720555.3.peg.688	CDS	Contig8	682375	683127	1	+	753	hypothetical protein	- none -
fig|720555.3.peg.689	CDS	Contig8	684164	683172	-2	-	993	Tryptophanyl-tRNA synthetase (EC 6.1.1.2)	tRNA aminoacylation, Trp
fig|720555.3.peg.690	CDS	Contig8	684903	686540	3	+	1638	Oligopeptide ABC transporter, periplasmic oligopeptide-binding protein OppA (TC 3.A.1.5.1)	- none -
fig|720555.3.peg.691	CDS	Contig8	686622	687584	3	+	963	Oligopeptide transport system permease protein OppB (TC 3.A.1.5.1)	- none -
fig|720555.3.peg.692	CDS	Contig8	687588	688505	3	+	918	Oligopeptide transport system permease protein OppC (TC 3.A.1.5.1)	- none -
fig|720555.3.peg.693	CDS	Contig8	688519	689586	1	+	1068	Oligopeptide transport ATP-binding protein OppD (TC 3.A.1.5.1)	- none -
fig|720555.3.peg.694	CDS	Contig8	689588	690505	2	+	918	Oligopeptide transport ATP-binding protein OppF (TC 3.A.1.5.1)	- none -
fig|720555.3.peg.695	CDS	Contig8	690652	690494	-1	-	159	hypothetical protein	- none -
fig|720555.3.peg.696	CDS	Contig8	690651	690839	3	+	189	hypothetical protein	- none -
fig|720555.3.peg.697	CDS	Contig8	690894	692084	3	+	1191	COG1306 predicted glycoside hydrolase	- none -
fig|720555.3.peg.698	CDS	Contig8	692234	692812	2	+	579	unknown	- none -
fig|720555.3.peg.699	CDS	Contig8	692993	693388	2	+	396	Arsenate reductase family protein	- none -
fig|720555.3.peg.700	CDS	Contig8	694086	693424	-3	-	663	membrane protein, putative	- none -
fig|720555.3.peg.701	CDS	Contig8	694366	695022	1	+	657	Negative regulator of genetic competence MecA	- none -
fig|720555.3.peg.702	CDS	Contig8	695182	696345	1	+	1164	Competence protein CoiA	- none -
fig|720555.3.peg.703	CDS	Contig8	696391	698403	1	+	2013	Oligoendopeptidase F (EC 3.4.24.-)	- none -
fig|720555.3.peg.704	CDS	Contig8	698606	698439	-2	-	168	hypothetical protein	- none -
fig|720555.3.peg.705	CDS	Contig8	699824	698922	-2	-	903	YjbH-like, GTP pyrophosphokinase domain	CBSS-222523.1.peg.1311
fig|720555.3.peg.706	CDS	Contig8	700219	699821	-1	-	399	Hemoglobin-like protein HbO	Bacterial hemoglobins
fig|720555.3.peg.707	CDS	Contig8	701198	700488	-2	-	711	Soluble lytic murein transglycosylase and related regulatory proteins (some contain LysM/invasin domains)	- none -
fig|720555.3.peg.708	CDS	Contig8	701785	701213	-1	-	573	Adenylate cyclase	CBSS-222523.1.peg.1311
fig|720555.3.peg.709	CDS	Contig8	701910	702278	3	+	369	hypothetical protein	- none -
fig|720555.3.peg.710	CDS	Contig8	702309	702947	3	+	639	GTP pyrophosphokinase (EC 2.7.6.5)	CBSS-222523.1.peg.1311
fig|720555.3.peg.711	CDS	Contig8	702966	703766	3	+	801	NAD kinase (EC 2.7.1.23)	NAD and NADP cofactor biosynthesis global; <br>CBSS-222523.1.peg.1311
fig|720555.3.peg.712	CDS	Contig8	703781	704677	2	+	897	Similar to ribosomal large subunit pseudouridine synthase D, Bacillus subtilis YjbO type	Ribosome biogenesis bacterial; <br>CBSS-222523.1.peg.1311
fig|720555.3.peg.713	CDS	Contig8	705495	704761	-3	-	735	Diadenosine tetraphosphatase	- none -
fig|720555.3.peg.714	CDS	Contig8	705740	707584	2	+	1845	Na+/H+ antiporter	ZZ gjo need homes
fig|720555.3.peg.715	CDS	Contig8	707835	708545	3	+	711	Thiaminase II (EC 3.5.99.2)	Thiamin biosynthesis
fig|720555.3.peg.716	CDS	Contig8	708523	709140	1	+	618	Thiamin-phosphate pyrophosphorylase (EC 2.5.1.3)	Thiamin biosynthesis
fig|720555.3.peg.717	CDS	Contig8	709124	710233	2	+	1110	Glycine oxidase ThiO (EC 1.4.3.19)	Thiamin biosynthesis
fig|720555.3.peg.718	CDS	Contig8	710230	710433	1	+	204	Sulfur carrier protein ThiS	Thiamin biosynthesis
fig|720555.3.peg.719	CDS	Contig8	710437	711201	1	+	765	Thiazole biosynthesis protein ThiG	Thiamin biosynthesis
fig|720555.3.peg.720	CDS	Contig8	711198	712208	3	+	1011	Sulfur carrier protein adenylyltransferase ThiF	Thiamin biosynthesis
fig|720555.3.peg.721	CDS	Contig8	712227	713042	3	+	816	Phosphomethylpyrimidine kinase (EC 2.7.4.7)	Thiamin biosynthesis
fig|720555.3.peg.722	CDS	Contig8	713179	713955	1	+	777	Enoyl-[acyl-carrier-protein] reductase [NADH] (EC 1.3.1.9)	Fatty Acid Biosynthesis FASII
fig|720555.3.peg.723	CDS	Contig8	714060	714845	3	+	786	unknown	- none -
fig|720555.3.peg.724	CDS	Contig8	715392	714952	-3	-	441	Spore coat protein Z	- none -
fig|720555.3.peg.725	CDS	Contig8	716020	715532	-1	-	489	Spore coat protein Y	- none -
fig|720555.3.peg.726	CDS	Contig8	716674	716168	-1	-	507	Spore coat protein X	- none -
fig|720555.3.peg.727	CDS	Contig8	717086	716766	-2	-	321	Spore coat protein W	- none -
fig|720555.3.peg.728	CDS	Contig8	717513	717127	-3	-	387	Spore coat protein V	- none -
fig|720555.3.peg.729	CDS	Contig8	717685	718041	1	+	357	Integral membrane protein	- none -
fig|720555.3.peg.730	CDS	Contig8	718118	718240	2	+	123	hypothetical protein	- none -
fig|720555.3.peg.731	CDS	Contig8	718331	718537	2	+	207	hypothetical protein	- none -
fig|720555.3.peg.732	CDS	Contig8	718619	718768	2	+	150	hypothetical protein	- none -
fig|720555.3.peg.733	CDS	Contig8	718944	719198	3	+	255	hypothetical protein	- none -
fig|720555.3.peg.734	CDS	Contig8	719158	719295	1	+	138	hypothetical protein	- none -
fig|720555.3.peg.735	CDS	Contig8	721569	719284	-3	-	2286	putative ATP-dependent DNA helicase YjcD	DNA repair, bacterial UvrD and related helicases
fig|720555.3.peg.736	CDS	Contig8	721524	721691	3	+	168	hypothetical protein	- none -
fig|720555.3.peg.737	CDS	Contig8	721688	721942	2	+	255	hypothetical protein	- none -
fig|720555.3.peg.738	CDS	Contig8	722635	722847	1	+	213	hypothetical protein	- none -
fig|720555.3.peg.739	CDS	Contig8	722837	722974	2	+	138	transposase	- none -
fig|720555.3.peg.740	CDS	Contig8	722986	723339	1	+	354	hypothetical protein	- none -
fig|720555.3.peg.741	CDS	Contig8	723889	723458	-1	-	432	GNAT family acetyltransferase YjcF	- none -
fig|720555.3.peg.742	CDS	Contig8	724410	723895	-3	-	516	2H phosphoesterase superfamily protein Bsu1186 (yjcG)	RNA processing orphans
fig|720555.3.peg.743	CDS	Contig8	725189	724467	-2	-	723	Putative acetyl esterase YjcH (EC 3.1.1.-)	- none -
fig|720555.3.peg.744	CDS	Contig8	725577	726698	3	+	1122	Cystathionine gamma-synthase (EC 2.5.1.48)	Methionine Biosynthesis
fig|720555.3.peg.745	CDS	Contig8	726691	727863	1	+	1173	Cystathionine beta-lyase (EC 4.4.1.8)	Methionine Biosynthesis
fig|720555.3.peg.746	CDS	Contig8	729340	728150	-1	-	1191	DUF819 domain-containing protein	- none -
fig|720555.3.peg.747	CDS	Contig8	730100	729702	-2	-	399	Integrase	- none -
fig|720555.3.peg.748	CDS	Contig8	730505	730624	2	+	120	hypothetical protein	- none -
fig|720555.3.peg.749	CDS	Contig8	731190	731333	3	+	144	hypothetical protein	- none -
fig|720555.3.peg.750	CDS	Contig8	732307	731486	-1	-	822	hypothetical protein	- none -
fig|720555.3.peg.751	CDS	Contig8	732556	732419	-1	-	138	hypothetical protein	- none -
fig|720555.3.peg.752	CDS	Contig8	734067	734249	3	+	183	hypothetical protein	- none -
fig|720555.3.peg.753	CDS	Contig8	734694	736604	3	+	1911	hypothetical protein	- none -
fig|720555.3.peg.754	CDS	Contig8	736616	736903	2	+	288	hypothetical protein	- none -
fig|720555.3.peg.755	CDS	Contig8	737417	737587	2	+	171	hypothetical protein	- none -
fig|720555.3.peg.756	CDS	Contig8	738308	738424	2	+	117	hypothetical protein	- none -
fig|720555.3.peg.757	CDS	Contig8	738421	738576	1	+	156	hypothetical protein	- none -
fig|720555.3.peg.758	CDS	Contig8	739003	738674	-1	-	330	Uncharacterized protein yurS	- none -
fig|720555.3.peg.759	CDS	Contig8	739341	739063	-3	-	279	hypothetical protein	- none -
fig|720555.3.peg.760	CDS	Contig8	739523	739957	2	+	435	nuclease	- none -
fig|720555.3.peg.761	CDS	Contig8	740105	740767	2	+	663	mgtC family protein	- none -
fig|720555.3.peg.762	CDS	Contig8	741065	740826	-2	-	240	YkzH	- none -
fig|720555.3.peg.763	CDS	Contig8	741490	741278	-1	-	213	hypothetical protein	- none -
fig|720555.3.peg.764	CDS	Contig8	741765	741550	-3	-	216	Spore coat protein T precursor	- none -
fig|720555.3.peg.765	CDS	Contig8	742080	743480	3	+	1401	Peptidoglycan N-acetylglucosamine deacetylase (EC 3.5.1.-)	Polysaccharide deacetylases
fig|720555.3.peg.766	CDS	Contig8	744045	743533	-3	-	513	hypothetical protein	- none -
fig|720555.3.peg.767	CDS	Contig8	744547	744137	-1	-	411	putative membrane protein	- none -
fig|720555.3.peg.768	CDS	Contig8	745254	744673	-3	-	582	hypothetical protein	- none -
fig|720555.3.peg.769	CDS	Contig8	745400	748354	2	+	2955	Formate dehydrogenase related protein	Formate hydrogenase
fig|720555.3.peg.770	CDS	Contig8	748347	748907	3	+	561	Hypothetical protein YrhD	Formate hydrogenase
fig|720555.3.peg.771	CDS	Contig8	749125	749718	1	+	594	hypothetical protein	- none -
fig|720555.3.peg.772	CDS	Contig8	749836	750453	1	+	618	Mutator MutT protein	- none -
fig|720555.3.peg.773	CDS	Contig8	750761	750483	-2	-	279	Uncharacterized protein yjiA precursor	- none -
fig|720555.3.peg.774	CDS	Contig8	751153	752343	1	+	1191	putative cytochrome P450 hydroxylase	Nitric oxide synthase
fig|720555.3.peg.775	CDS	Contig8	752390	753571	2	+	1182	hypothetical protein	- none -
fig|720555.3.peg.776	CDS	Contig8	753632	754171	2	+	540	Glutathione-regulated potassium-efflux system protein KefB	- none -
fig|720555.3.peg.777	CDS	Contig8	754584	754213	-3	-	372	hypothetical protein	- none -
fig|720555.3.peg.778	CDS	Contig8	754790	754602	-2	-	189	hypothetical protein	- none -
fig|720555.3.peg.779	CDS	Contig8	755029	755847	1	+	819	uroporphyrinogen-III synthetase	- none -
fig|720555.3.peg.780	CDS	Contig8	756920	756168	-2	-	753	YbbM seven transmembrane helix protein	Broadly distributed proteins not in subsystems
fig|720555.3.peg.781	CDS	Contig8	757672	756920	-1	-	753	YbbL ABC transporter ATP-binding protein	Broadly distributed proteins not in subsystems
fig|720555.3.peg.782	CDS	Contig8	758793	757822	-3	-	972	membrane protein, putative	- none -
fig|720555.3.peg.783	CDS	Contig8	758920	759417	1	+	498	Cupin domain-containing protein	- none -
fig|720555.3.peg.784	CDS	Contig8	759797	760219	2	+	423	hypothetical protein	- none -
fig|720555.3.peg.785	CDS	Contig8	760260	761438	3	+	1179	NADH dehydrogenase (EC 1.6.99.3)	Respiratory dehydrogenases 1
fig|720555.3.peg.786	CDS	Contig8	761778	763178	3	+	1401	Uronate isomerase (EC 5.3.1.12)	Entner-Doudoroff Pathway
fig|720555.3.peg.787	CDS	Contig8	763205	764593	2	+	1389	Melibiose carrier protein, Na+/melibiose symporter	Melibiose Utilization
fig|720555.3.peg.788	CDS	Contig8	764670	765674	3	+	1005	Hexuronate utilization operon transcriptional repressor ExuR	- none -
fig|720555.3.peg.789	CDS	Contig8	765749	767200	2	+	1452	Altronate oxidoreductase (EC 1.1.1.58)	- none -
fig|720555.3.peg.790	CDS	Contig8	767202	768695	3	+	1494	Altronate hydrolase (EC 4.2.1.7)	Entner-Doudoroff Pathway
fig|720555.3.peg.791	CDS	Contig8	769503	768736	-3	-	768	hypothetical protein	- none -
fig|720555.3.peg.792	CDS	Contig8	769809	769687	-3	-	123	hypothetical protein	- none -
fig|720555.3.peg.793	CDS	Contig8	770349	769888	-3	-	462	hypothetical protein	- none -
fig|720555.3.peg.794	CDS	Contig8	770591	770430	-2	-	162	hypothetical protein	- none -
fig|720555.3.peg.795	CDS	Contig8	770610	771746	3	+	1137	response regulator aspartate phosphatase	- none -
fig|720555.3.peg.796	CDS	Contig8	771736	771870	1	+	135	inhibitor of the activity of phosphatase RapA	- none -
fig|720555.3.peg.797	CDS	Contig8	772086	771955	-3	-	132	hypothetical protein	- none -
fig|720555.3.peg.798	CDS	Contig8	772279	773238	1	+	960	N-acetylmuramoyl-L-alanine amidase( EC:3.5.1.28 )	- none -
fig|720555.3.peg.799	CDS	Contig8	773675	773298	-2	-	378	DUF1696 domain-containing protein	- none -
fig|720555.3.peg.800	CDS	Contig8	773784	774389	3	+	606	hypothetical protein	- none -
fig|720555.3.peg.801	CDS	Contig8	775161	774544	-3	-	618	Phage-like element PBSX protein xkdA	- none -
fig|720555.3.peg.802	CDS	Contig8	775162	775308	1	+	147	hypothetical protein	- none -
fig|720555.3.peg.803	CDS	Contig8	775664	775323	-2	-	342	negative regulation of the defective prophage PBSX genes	- none -
fig|720555.3.peg.804	CDS	Contig8	775854	776033	3	+	180	hypothetical protein	- none -
fig|720555.3.peg.805	CDS	Contig8	776020	776856	1	+	837	Phage-like element PBSX protein xkdB	- none -
fig|720555.3.peg.806	CDS	Contig8	776819	777556	2	+	738	DNA replication protein DnaC	- none -
fig|720555.3.peg.807	CDS	Contig8	777556	777723	1	+	168	hypothetical protein	- none -
fig|720555.3.peg.808	CDS	Contig8	777798	778169	3	+	372	Phage-like element PBSX protein xkdD	- none -
fig|720555.3.peg.809	CDS	Contig8	778159	778362	1	+	204	Phage-like element PBSX protein xtrA	- none -
fig|720555.3.peg.810	CDS	Contig8	778479	778988	3	+	510	prophage LambdaBa01, positive control factor Xpf, putative	- none -
fig|720555.3.peg.811	CDS	Contig8	779106	779906	3	+	801	PBSX phage terminase small subunit	- none -
fig|720555.3.peg.812	CDS	Contig8	779903	781201	2	+	1299	Terminase large subunit	- none -
fig|720555.3.peg.813	CDS	Contig8	781204	782694	1	+	1491	Phage-like element PBSX protein xkdE	- none -
fig|720555.3.peg.814	CDS	Contig8	782714	783583	2	+	870	hypothetical protein	- none -
fig|720555.3.peg.815	CDS	Contig8	783608	784543	2	+	936	Phage-like element PBSX protein xkdG	- none -
fig|720555.3.peg.816	CDS	Contig8	784567	784950	1	+	384	unknown	- none -
fig|720555.3.peg.817	CDS	Contig8	784947	785303	3	+	357	Phage-like element PBSX protein xkdH	- none -
fig|720555.3.peg.818	CDS	Contig8	785300	785788	2	+	489	Phage-like element PBSX protein xkdI	- none -
fig|720555.3.peg.819	CDS	Contig8	785800	786240	1	+	441	Phage-like element PBSX protein xkdJ	- none -
fig|720555.3.peg.820	CDS	Contig8	786243	786452	3	+	210	hypothetical protein	- none -
fig|720555.3.peg.821	CDS	Contig8	786454	787854	1	+	1401	Phage-like element PBSX protein xkdK	- none -
fig|720555.3.peg.822	CDS	Contig8	787856	788299	2	+	444	Phage-like element PBSX protein xkdM	- none -
fig|720555.3.peg.823	CDS	Contig8	788389	788835	1	+	447	Phage-like element PBSX protein xkdN	- none -
fig|720555.3.peg.824	CDS	Contig8	788859	789014	3	+	156	hypothetical protein	- none -
fig|720555.3.peg.825	CDS	Contig8	789025	793200	1	+	4176	hypothetical protein	- none -
fig|720555.3.peg.826	CDS	Contig8	793193	793852	2	+	660	Phage-like element PBSX protein xkdP	- none -
fig|720555.3.peg.827	CDS	Contig8	793868	794845	2	+	978	Phage-like element PBSX protein xkdQ	- none -
fig|720555.3.peg.828	CDS	Contig8	794845	795111	1	+	267	Phage-like element PBSX protein xkdR	- none -
fig|720555.3.peg.829	CDS	Contig8	795177	795554	3	+	378	biphenyl-2,3-diol 1,2-dioxygenase III-related protein	Biphenyl Degradation
fig|720555.3.peg.830	CDS	Contig8	795634	796059	1	+	426	Phage-like element PBSX protein xkdS	- none -
fig|720555.3.peg.831	CDS	Contig8	796052	797098	2	+	1047	Phage-like element PBSX protein xkdT	- none -
fig|720555.3.peg.832	CDS	Contig8	797082	797660	3	+	579	Phage-like element PBSX protein xkdU	- none -
fig|720555.3.peg.833	CDS	Contig8	797657	797929	2	+	273	unknown	- none -
fig|720555.3.peg.834	CDS	Contig8	797932	799671	1	+	1740	Uncharacterized protein yqcC	- none -
fig|720555.3.peg.835	CDS	Contig8	799688	800017	2	+	330	hypothetical protein	- none -
fig|720555.3.peg.836	CDS	Contig8	800014	800178	1	+	165	peptidase, U32 family large subunit [C1]	- none -
fig|720555.3.peg.837	CDS	Contig8	800254	801102	1	+	849	Phage-like element PBSX protein xepA (Protein xkdY)	- none -
fig|720555.3.peg.838	CDS	Contig8	801175	801453	1	+	279	O-acetylhomoserine sulfhydrylase (EC 2.5.1.49) / O-succinylhomoserine sulfhydrylase (EC 2.5.1.48)	Methionine Biosynthesis; <br>Methionine Biosynthesis
fig|720555.3.peg.839	CDS	Contig8	801466	801729	1	+	264	holin	- none -
fig|720555.3.peg.840	CDS	Contig8	801742	802635	1	+	894	N-acetylmuramoyl-L-alanine amidase	- none -
fig|720555.3.peg.841	CDS	Contig8	802833	802711	-3	-	123	hypothetical protein	- none -
fig|720555.3.peg.842	CDS	Contig8	803101	802931	-1	-	171	Stage II sporulation protein SB (Antidote protein spoIISB)	- none -
fig|720555.3.peg.843	CDS	Contig8	803811	803101	-3	-	711	alternate gene name: ykaC lethal when synthesized during vegetative growth in the absence of SpoIISB	- none -
fig|720555.3.peg.844	CDS	Contig8	804954	803956	-3	-	999	Probable low-affinity inorganic phosphate transporter	Phosphate metabolism
fig|720555.3.peg.845	CDS	Contig8	805584	804967	-3	-	618	hypothetical protein	- none -
fig|720555.3.peg.846	CDS	Contig8	805614	805781	3	+	168	hypothetical protein	- none -
fig|720555.3.peg.847	CDS	Contig8	807188	805872	-2	-	1317	amino acid permease family protein	- none -
fig|720555.3.peg.848	CDS	Contig8	807608	808558	2	+	951	Glyoxalase family protein	- none -
fig|720555.3.peg.849	CDS	Contig8	808838	810979	2	+	2142	hypothetical protein	- none -
fig|720555.3.peg.850	CDS	Contig8	810992	811963	2	+	972	Glycosyltransferase	- none -
fig|720555.3.peg.851	CDS	Contig8	812204	812088	-2	-	117	hypothetical protein	- none -
fig|720555.3.peg.852	CDS	Contig8	812188	812313	1	+	126	hypothetical protein	- none -
fig|720555.3.peg.853	CDS	Contig8	814004	812640	-2	-	1365	Serine protease, DegP/HtrA, do-like (EC 3.4.21.-)	SA:14-24
fig|720555.3.peg.854	CDS	Contig8	814174	815013	1	+	840	Pyrroline-5-carboxylate reductase (EC 1.5.1.2), ProG-like	Proline, 4-hydroxyproline uptake and utilization; <br>Proline Synthesis
fig|720555.3.peg.855	CDS	Contig8	815162	815986	2	+	825	D-aminopeptidase (EC 3.4.11.-)	- none -
fig|720555.3.peg.856	CDS	Contig8	816001	816927	1	+	927	Dipeptide transport system permease protein DppB (TC 3.A.1.5.2)	ABC transporter dipeptide (TC 3.A.1.5.2)
fig|720555.3.peg.857	CDS	Contig8	816933	817895	3	+	963	Dipeptide transport system permease protein DppC (TC 3.A.1.5.2)	ABC transporter dipeptide (TC 3.A.1.5.2)
fig|720555.3.peg.858	CDS	Contig8	817900	818913	1	+	1014	Oligopeptide transport ATP-binding protein OppD (TC 3.A.1.5.1)	- none -
fig|720555.3.peg.859	CDS	Contig8	818925	820550	3	+	1626	dipeptide ABC transporter (dipeptide-binding protein)	- none -
fig|720555.3.peg.860	CDS	Contig8	820659	821600	3	+	942	Muramoyltetrapeptide carboxypeptidase (EC 3.4.17.13)	Recycling of Peptidoglycan Amino Acids; <br>Murein Hydrolases
fig|720555.3.peg.861	CDS	Contig8	821597	822697	2	+	1101	L-alanine-DL-glutamate epimerase	Muconate lactonizing enzyme family; <br>Recycling of Peptidoglycan Amino Acids
fig|720555.3.peg.862	CDS	Contig8	822694	823584	1	+	891	NLP/P60 family protein	CBSS-393121.3.peg.2760
fig|720555.3.peg.863	CDS	Contig8	823598	824602	2	+	1005	Oligopeptide transport ATP-binding protein OppF (TC 3.A.1.5.1)	- none -
fig|720555.3.peg.864	CDS	Contig8	825723	824674	-3	-	1050	6-phosphogluconolactonase (EC 3.1.1.31)	Pentose phosphate pathway; <br>Entner-Doudoroff Pathway; <br>Formaldehyde assimilation: Ribulose monophosphate pathway
fig|720555.3.peg.865	CDS	Contig8	826674	825814	-3	-	861	NG,NG-dimethylarginine dimethylaminohydrolase 1 (EC 3.5.3.18)	Dimethylarginine metabolism
fig|720555.3.peg.866	CDS	Contig8	826868	827386	2	+	519	Acyl-CoA hydrolase (EC 3.1.2.20)	CBSS-176280.1.peg.1561
fig|720555.3.peg.867	CDS	Contig8	827483	828217	2	+	735	probable membrane protein yetF	- none -
fig|720555.3.peg.868	CDS	Contig8	828321	828647	3	+	327	Transcriptional regulator, PadR family	CBSS-1352.1.peg.856
fig|720555.3.peg.869	CDS	Contig8	828647	829390	2	+	744	NADH dehydrogenase subunit N	- none -
fig|720555.3.peg.870	CDS	Contig8	829447	829818	1	+	372	CheY-like domain containing protein	- none -
fig|720555.3.peg.871	CDS	Contig8	829825	830421	1	+	597	unknown	- none -
fig|720555.3.peg.872	CDS	Contig8	830452	830967	1	+	516	hypothetical protein	- none -
fig|720555.3.peg.873	CDS	Contig8	831199	831537	1	+	339	Quaternary ammonium compound-resistance protein sugE	- none -
fig|720555.3.peg.874	CDS	Contig8	831537	831854	3	+	318	Quaternary ammonium compound-resistance protein sugE	- none -
fig|720555.3.peg.875	CDS	Contig8	831926	832828	2	+	903	Formyltetrahydrofolate deformylase (EC 3.5.1.10)	One-carbon metabolism by tetrahydropterines
fig|720555.3.peg.876	CDS	Contig8	833194	834291	1	+	1098	Glutamate 5-kinase (EC 2.7.2.11)	Proline, 4-hydroxyproline uptake and utilization; <br>Proline Synthesis
fig|720555.3.peg.877	CDS	Contig8	834303	835550	3	+	1248	Gamma-glutamyl phosphate reductase (EC 1.2.1.41)	Proline, 4-hydroxyproline uptake and utilization; <br>Proline Synthesis
fig|720555.3.peg.878	CDS	Contig8	835671	836096	3	+	426	Organic hydroperoxide resistance protein	CBSS-269482.1.peg.1294; <br>Oxidative stress
fig|720555.3.peg.879	CDS	Contig8	836579	836130	-2	-	450	Organic hydroperoxide resistance transcriptional regulator	CBSS-269482.1.peg.1294; <br>Oxidative stress
fig|720555.3.peg.880	CDS	Contig8	836726	837139	2	+	414	Organic hydroperoxide resistance protein	CBSS-269482.1.peg.1294; <br>Oxidative stress
fig|720555.3.peg.881	CDS	Contig8	837286	837861	1	+	576	hypothetical protein	- none -
fig|720555.3.peg.882	CDS	Contig8	837867	838340	3	+	474	hypothetical protein	- none -
fig|720555.3.peg.883	CDS	Contig8	838346	839473	2	+	1128	glycosyl transferase, group 2 family protein	- none -
fig|720555.3.peg.884	CDS	Contig8	841034	839493	-2	-	1542	Flagellar hook-length control protein FliK	- none -
fig|720555.3.peg.885	CDS	Contig8	841688	841218	-2	-	471	Guanine deaminase (EC 3.5.4.3)	Purine conversions; <br>Purine Utilization
fig|720555.3.peg.886	CDS	Contig8	841822	842448	1	+	627	phosphoglycerate mutase family protein( EC:5.4.2.1 )	- none -
fig|720555.3.peg.887	CDS	Contig8	844936	842648	-1	-	2289	5-methyltetrahydropteroyltriglutamate--homocysteine methyltransferase (EC 2.1.1.14)	Methionine Biosynthesis
fig|720555.3.peg.888	CDS	Contig8	846347	845388	-2	-	960	Major intracellular serine protease precursor (EC 3.4.21.-)	- none -
fig|720555.3.peg.889	CDS	Contig8	846595	847428	1	+	834	RsbR, positive regulator of sigma-B	SigmaB stress responce regulation
fig|720555.3.peg.890	CDS	Contig8	848242	847481	-1	-	762	Transmembrane component YkoC of energizing module of thiamin-regulated ECF transporter for HydroxyMethylPyrimidine	Thiamin biosynthesis; <br>ECF class transporters
fig|720555.3.peg.891	CDS	Contig8	849860	848217	-2	-	1644	Duplicated ATPase component YkoD of energizing module of thiamin-regulated ECF transporter for HydroxyMethylPyrimidine	ECF class transporters
fig|720555.3.peg.892	CDS	Contig8	850446	849847	-3	-	600	Substrate-specific component YkoE of thiamin-regulated ECF transporter for HydroxyMethylPyrimidine	Thiamin biosynthesis; <br>ECF class transporters
fig|720555.3.peg.893	CDS	Contig8	851041	850427	-1	-	615	Additional substrate-binding component of thiamin-regulated ECF transporter for HydroxyMethylPyrimidine	Thiamin biosynthesis
fig|720555.3.peg.894	CDS	Contig8	851353	852030	1	+	678	two-component response regulator	- none -
fig|720555.3.peg.895	CDS	Contig8	852034	853395	1	+	1362	Phosphate regulon sensor protein PhoR (EC 2.7.3.-)	High affinity phosphate transporter and control of PHO regulon; <br>Phosphate metabolism
fig|720555.3.peg.896	CDS	Contig8	853410	854090	3	+	681	YKOI	- none -
fig|720555.3.peg.897	CDS	Contig8	854183	854698	2	+	516	YKOJ	- none -
fig|720555.3.peg.898	CDS	Contig8	854778	854915	3	+	138	hypothetical protein	- none -
fig|720555.3.peg.899	CDS	Contig8	855428	856783	2	+	1356	Magnesium transporter	- none -
fig|720555.3.peg.900	CDS	Contig8	857161	856829	-1	-	333	global nitrogen regulation (positive regulation of nrgAB, nasB, gabP, ureABC; negative regulation of glnRA)	- none -
fig|720555.3.peg.901	CDS	Contig8	857354	857509	2	+	156	unknown	- none -
fig|720555.3.peg.902	CDS	Contig8	857598	857780	3	+	183	hypothetical protein	- none -
fig|720555.3.peg.903	CDS	Contig8	857926	858390	1	+	465	Transcriptional regulator, MarR family	- none -
fig|720555.3.peg.904	CDS	Contig8	859576	858473	-1	-	1104	1,2-diacylglycerol 3-glucosyltransferase (EC 2.4.1.157); diglucosyldiacylglycerol synthase (LTA membrane anchor synthesis); putative	Teichoic and lipoteichoic acids biosynthesis
fig|720555.3.peg.905	CDS	Contig8	859679	860230	2	+	552	unknown	- none -
fig|720555.3.peg.906	CDS	Contig8	861075	860260	-3	-	816	phosphoesterase	- none -
fig|720555.3.peg.907	CDS	Contig8	861210	861076	-3	-	135	hypothetical protein	- none -
fig|720555.3.peg.908	CDS	Contig8	862789	861218	-1	-	1572	hypothetical protein	- none -
fig|720555.3.peg.909	CDS	Contig8	862994	864688	2	+	1695	alternate gene name: ykoR	- none -
fig|720555.3.peg.910	CDS	Contig8	864701	865717	2	+	1017	Glycosyltransferase	- none -
fig|720555.3.peg.911	CDS	Contig8	867564	865741	-3	-	1824	ATP-dependent DNA ligase (EC 6.5.1.1) clustered with Ku protein, LigD	Nonhomologous End-Joining in Bacteria
fig|720555.3.peg.912	CDS	Contig8	868464	867580	-3	-	885	Ku domain protein	Nonhomologous End-Joining in Bacteria
fig|720555.3.peg.913	CDS	Contig8	868513	868773	1	+	261	Predicted signal transduction protein	- none -
fig|720555.3.peg.914	CDS	Contig8	869044	869250	1	+	207	hypothetical protein	- none -
fig|720555.3.peg.915	CDS	Contig8	869483	869349	-2	-	135	hypothetical protein	- none -
fig|720555.3.peg.916	CDS	Contig8	869829	870467	3	+	639	DedA family protein	- none -
fig|720555.3.peg.917	CDS	Contig8	870727	871521	1	+	795	membrane protein, TerC family	- none -
fig|720555.3.peg.918	CDS	Contig8	871790	872545	2	+	756	RNA polymerase heat shock sigma factor SigI	- none -
fig|720555.3.peg.919	CDS	Contig8	872542	873702	1	+	1161	hypothetical protein	- none -
fig|720555.3.peg.920	CDS	Contig8	873898	873704	-1	-	195	Small acid-soluble spore protein, alpha/beta family, SASP_6	Small acid-soluble spore proteins
fig|720555.3.peg.921	CDS	Contig8	874732	874031	-1	-	702	hypothetical protein	- none -
fig|720555.3.peg.922	CDS	Contig8	874743	874859	3	+	117	hypothetical protein	- none -
fig|720555.3.peg.923	CDS	Contig8	874907	875803	2	+	897	Probable protease htpX homolog (EC 3.4.24.-)	- none -
fig|720555.3.peg.924	CDS	Contig8	875987	877336	2	+	1350	Potassium uptake protein, integral membrane component, KtrD	- none -
fig|720555.3.peg.925	CDS	Contig8	877437	877970	3	+	534	YDFR protein	- none -
fig|720555.3.peg.926	CDS	Contig8	877960	878115	1	+	156	hypothetical protein	- none -
fig|720555.3.peg.927	CDS	Contig8	878119	878286	1	+	168	unknown	- none -
fig|720555.3.peg.928	CDS	Contig8	879349	878327	-1	-	1023	membrane protein, putative	- none -
fig|720555.3.peg.929	CDS	Contig8	879604	881823	1	+	2220	Two-component sensor histidine kinase	- none -
fig|720555.3.peg.930	CDS	Contig8	881820	882317	3	+	498	Methylated-DNA--protein-cysteine methyltransferase (EC 2.1.1.63)	DNA repair, bacterial
fig|720555.3.peg.931	CDS	Contig8	882409	882528	1	+	120	hypothetical protein	- none -
fig|720555.3.peg.932	CDS	Contig8	883628	882564	-2	-	1065	Methylthioribose-1-phosphate isomerase (EC 5.3.1.23)	Methionine Salvage
fig|720555.3.peg.933	CDS	Contig8	884825	883632	-2	-	1194	5-methylthioribose kinase (EC 2.7.1.100)	Methionine Salvage
fig|720555.3.peg.934	CDS	Contig8	885961	885182	-1	-	780	Aliphatic amidase amiE (EC 3.5.1.4)	- none -
fig|720555.3.peg.935	CDS	Contig8	885922	886062	1	+	141	hypothetical protein	- none -
fig|720555.3.peg.936	CDS	Contig8	886059	887282	3	+	1224	Glutamine-dependent 2-keto-4-methylthiobutyrate transaminase	Methionine Salvage
fig|720555.3.peg.937	CDS	Contig8	887475	888692	3	+	1218	2,3-diketo-5-methylthiopentyl-1-phosphate enolase	Methionine Salvage
fig|720555.3.peg.938	CDS	Contig8	888689	889393	2	+	705	2-hydroxy-3-keto-5-methylthiopentenyl-1-phosphate phosphatase	Methionine Salvage
fig|720555.3.peg.939	CDS	Contig8	889351	889980	1	+	630	Methylthioribulose-1-phosphate dehydratase (EC 4.2.1.109)	Methionine Salvage
fig|720555.3.peg.940	CDS	Contig8	889999	890532	1	+	534	1,2-dihydroxy-3-keto-5-methylthiopentene dioxygenase (EC 1.13.11.54)	Methionine Salvage
fig|720555.3.peg.941	CDS	Contig8	890890	890567	-1	-	324	hypothetical protein	- none -
fig|720555.3.peg.942	CDS	Contig8	891111	891368	3	+	258	Adenylate cyclase (EC 4.6.1.1)	cAMP signaling in bacteria
fig|720555.3.peg.943	CDS	Contig8	891451	891882	1	+	432	Succinate dehydrogenase hydrophobic membrane anchor protein	Succinate dehydrogenase
fig|720555.3.peg.944	CDS	Contig8	893417	891918	-2	-	1500	sensor histidine kinase KinD	- none -
fig|720555.3.peg.945	CDS	Contig8	893643	894092	3	+	450	Transcriptional regulator, MarR family	- none -
fig|720555.3.peg.946	CDS	Contig8	894919	894131	-1	-	789	Flagellar motor rotation protein MotB	- none -
fig|720555.3.peg.947	CDS	Contig8	895706	894891	-2	-	816	Flagellar motor rotation protein MotA	- none -
fig|720555.3.peg.948	CDS	Contig8	897984	896011	-3	-	1974	ATP-dependent Clp protease-like	- none -
fig|720555.3.peg.949	CDS	Contig8	898510	899544	1	+	1035	membrane protein, putative	- none -
fig|720555.3.peg.950	CDS	Contig8	899657	900802	2	+	1146	hypothetical protein	- none -
fig|720555.3.peg.951	CDS	Contig8	901071	901730	3	+	660	Queuosine Biosynthesis QueC ATPase	Queuosine-Archaeosine Biosynthesis
fig|720555.3.peg.952	CDS	Contig8	901731	902171	3	+	441	Queuosine biosynthesis QueD, PTPS-I	Zinc regulated enzymes; <br>Queuosine-Archaeosine Biosynthesis
fig|720555.3.peg.953	CDS	Contig8	902164	902895	1	+	732	Queuosine Biosynthesis QueE Radical SAM	Queuosine-Archaeosine Biosynthesis
fig|720555.3.peg.954	CDS	Contig8	902913	903410	3	+	498	NADPH dependent preQ0 reductase	Queuosine-Archaeosine Biosynthesis
fig|720555.3.peg.955	CDS	Contig8	903718	904557	1	+	840	RsbR, positive regulator of sigma-B	SigmaB stress responce regulation
fig|720555.3.peg.956	CDS	Contig8	904657	904968	1	+	312	hypothetical protein	- none -
fig|720555.3.peg.957	CDS	Contig8	905504	904989	-2	-	516	acetyltransferase, GNAT family	- none -
fig|720555.3.peg.958	CDS	Contig8	905824	905639	-1	-	186	hypothetical protein	- none -
fig|720555.3.peg.959	CDS	Contig8	905991	906182	3	+	192	hypothetical protein	- none -
fig|720555.3.peg.960	CDS	Contig8	906478	907122	1	+	645	Uncharacterized protein YkvT, NOT involved in spore germination	Spore germination
fig|720555.3.peg.961	CDS	Contig8	907241	908581	2	+	1341	Sporulation protein YkvU	- none -
fig|720555.3.peg.962	CDS	Contig8	908639	909130	2	+	492	Sporulation thiol-disulfide oxidoreductase StoA precursor (Stage IV sporulation protein H)	- none -
fig|720555.3.peg.963	CDS	Contig8	909373	911289	1	+	1917	Lead, cadmium, zinc and mercury transporting ATPase (EC 3.6.3.3) (EC 3.6.3.5); Copper-translocating P-type ATPase (EC 3.6.3.4)	Terminal cytochrome C oxidases; <br>Copper homeostasis
fig|720555.3.peg.964	CDS	Contig8	911540	911331	-2	-	210	hypothetical protein	- none -
fig|720555.3.peg.965	CDS	Contig8	911682	912776	3	+	1095	Proline dipeptidase (EC 3.4.13.9)	CBSS-269801.1.peg.809
fig|720555.3.peg.966	CDS	Contig8	912998	912873	-2	-	126	hypothetical protein	- none -
fig|720555.3.peg.967	CDS	Contig8	913046	914056	2	+	1011	sugar-binding transcriptional regulator, LacI family	- none -
fig|720555.3.peg.968	CDS	Contig8	914119	914985	1	+	867	Transcription antiterminator GlcT	- none -
fig|720555.3.peg.969	CDS	Contig8	915218	917317	2	+	2100	PTS system, glucose-specific IIC component (EC 2.7.1.69) / PTS system, glucose-specific IIB component (EC 2.7.1.69) / PTS system, glucose-specific IIA component (EC 2.7.1.69)	Trehalose Uptake and Utilization; <br>Trehalose Uptake and Utilization; <br>Trehalose Uptake and Utilization
fig|720555.3.peg.970	CDS	Contig8	917416	917682	1	+	267	Phosphocarrier protein of PTS system	Mannitol Utilization; <br>HPr catabolite repression system
fig|720555.3.peg.971	CDS	Contig8	917682	919397	3	+	1716	Phosphoenolpyruvate-protein phosphotransferase of PTS system (EC 2.7.3.9)	Mannitol Utilization
fig|720555.3.peg.972	CDS	Contig8	919486	919725	1	+	240	transcriptional regulator	- none -
fig|720555.3.peg.973	CDS	Contig8	919804	920832	1	+	1029	Spore photoproduct lyase (EC 4.1.99.-)	- none -
fig|720555.3.peg.974	CDS	Contig8	921524	920829	-2	-	696	Methyltransferase type 11	- none -
fig|720555.3.peg.975	CDS	Contig8	921681	923648	3	+	1968	methyl-accepting chemotaxis protein	- none -
fig|720555.3.peg.976	CDS	Contig8	923931	924797	3	+	867	2-hydroxy-3-oxopropionate reductase (EC 1.1.1.60)	D-galactarate, D-glucarate and D-glycerate catabolism; <br>Glycerate metabolism
fig|720555.3.peg.977	CDS	Contig8	925645	924842	-1	-	804	hypothetical protein	- none -
fig|720555.3.peg.978	CDS	Contig8	925987	928107	1	+	2121	Cell division protein FtsI [Peptidoglycan synthetase] (EC 2.4.1.129) / Transpeptidase, Penicillin binding protein transpeptidase domain	Peptidoglycan Biosynthesis; <br>Flagellum in Campylobacter; <br>Bacterial Cytoskeleton; <br>Bacterial Cell Division
fig|720555.3.peg.979	CDS	Contig8	928291	930111	1	+	1821	Sporulation kinase A (EC 2.7.13.3)	Sporulation gene orphans
fig|720555.3.peg.980	CDS	Contig8	931303	930134	-1	-	1170	N-acetyl-L,L-diaminopimelate aminotransferase (EC 2.6.1.-)	Lysine Biosynthesis DAP Pathway
fig|720555.3.peg.981	CDS	Contig8	931670	931509	-2	-	162	hypothetical protein	- none -
fig|720555.3.peg.982	CDS	Contig8	931880	932791	2	+	912	Chemotaxis protein CheV (EC 2.7.3.-)	Bacterial Chemotaxis
fig|720555.3.peg.983	CDS	Contig8	933309	932845	-3	-	465	unknown	- none -
fig|720555.3.peg.984	CDS	Contig8	934727	933432	-2	-	1296	Macrolide-efflux protein	- none -
fig|720555.3.peg.985	CDS	Contig8	935285	934803	-2	-	483	Protein erfK/srfK precursor	- none -
fig|720555.3.peg.986	CDS	Contig8	935301	935414	3	+	114	hypothetical protein	- none -
fig|720555.3.peg.987	CDS	Contig8	936296	935436	-2	-	861	Ser/Thr protein phosphatase family protein	- none -
fig|720555.3.peg.988	CDS	Contig8	936442	937206	1	+	765	2,4-dienoyl-CoA reductase, mitochondrial precursor (EC 1.3.1.34)	- none -
fig|720555.3.peg.989	CDS	Contig8	937776	938996	3	+	1221	EAL-domain protein	- none -
fig|720555.3.peg.990	CDS	Contig8	939272	940180	2	+	909	Manganese catalase (EC 1.11.1.6)	- none -
fig|720555.3.peg.991	CDS	Contig8	940185	940298	3	+	114	hypothetical protein	- none -
fig|720555.3.peg.992	CDS	Contig8	940373	940612	2	+	240	hypothetical protein	- none -
fig|720555.3.peg.993	CDS	Contig8	940712	941230	2	+	519	DUF458 domain-containing protein	- none -
fig|720555.3.peg.994	CDS	Contig8	941374	941565	1	+	192	unknown	- none -
fig|720555.3.peg.995	CDS	Contig8	941705	942148	2	+	444	FIG042801: CBS domain containing protein	- none -
fig|720555.3.peg.996	CDS	Contig8	942297	943178	3	+	882	transcriptional regulator, LysR family	- none -
fig|720555.3.peg.997	CDS	Contig8	943292	943768	2	+	477	Flavodoxin	Flavodoxin
fig|720555.3.peg.998	CDS	Contig8	943758	944651	3	+	894	unknown	- none -
fig|720555.3.peg.999	CDS	Contig8	944684	945139	2	+	456	Flavodoxin	Flavodoxin
fig|720555.3.peg.1000	CDS	Contig8	945245	945955	2	+	711	2,3,4,5-tetrahydropyridine-2,6-dicarboxylate N-acetyltransferase (EC 2.3.1.89)	Lysine Biosynthesis DAP Pathway
fig|720555.3.peg.1001	CDS	Contig8	946028	947152	2	+	1125	N-acetyl-L,L-diaminopimelate deacetylase (EC 3.5.1.47)	Lysine Biosynthesis DAP Pathway
fig|720555.3.peg.1002	CDS	Contig8	947213	947458	2	+	246	hypothetical protein	- none -
fig|720555.3.peg.1003	CDS	Contig8	948300	947497	-3	-	804	Potassium efflux system KefA protein / Small-conductance mechanosensitive channel	Potassium homeostasis
fig|720555.3.peg.1004	CDS	Contig8	948550	949092	1	+	543	Alkyl hydroperoxide reductase subunit C-like protein	Thioredoxin-disulfide reductase; <br>Oxidative stress
fig|720555.3.peg.1005	CDS	Contig8	949177	949635	1	+	459	hypothetical protein	- none -
fig|720555.3.peg.1006	CDS	Contig8	949832	949966	2	+	135	Transcriptional repressor of aerobactin receptor iutR	- none -
fig|720555.3.peg.1007	CDS	Contig8	950124	950699	3	+	576	unknown	- none -
fig|720555.3.peg.1008	CDS	Contig8	951704	950745	-2	-	960	Sporulation protein Cse15	- none -
fig|720555.3.peg.1009	CDS	Contig8	951848	952432	2	+	585	Molybdopterin-guanine dinucleotide biosynthesis protein MobA	- none -
fig|720555.3.peg.1010	CDS	Contig8	952504	953523	1	+	1020	Molybdopterin biosynthesis protein MoeB	- none -
fig|720555.3.peg.1011	CDS	Contig8	953542	954834	1	+	1293	Molybdopterin biosynthesis protein MoeA	- none -
fig|720555.3.peg.1012	CDS	Contig8	954795	955319	3	+	525	Molybdopterin-guanine dinucleotide biosynthesis protein MobB	- none -
fig|720555.3.peg.1013	CDS	Contig8	955319	955792	2	+	474	Molybdenum cofactor biosynthesis protein MoaE; Molybdopterin converting factor subunit 2	- none -
fig|720555.3.peg.1014	CDS	Contig8	955785	956018	3	+	234	molybdopterin converting factor (subunit 1)	- none -
fig|720555.3.peg.1015	CDS	Contig8	956255	958009	2	+	1755	ABC transporter, ATP-binding/permease protein	- none -
fig|720555.3.peg.1016	CDS	Contig8	958018	959826	1	+	1809	ABC transporter, ATP-binding/permease protein	- none -
fig|720555.3.peg.1017	CDS	Contig8	960010	960696	1	+	687	unknown	- none -
fig|720555.3.peg.1018	CDS	Contig8	960700	961833	1	+	1134	periplasmic component of efflux system	- none -
fig|720555.3.peg.1019	CDS	Contig8	961833	962522	3	+	690	ABC transporter, ATP-binding protein	- none -
fig|720555.3.peg.1020	CDS	Contig8	962519	963712	2	+	1194	ABC transporter, ATP-binding protein	- none -
fig|720555.3.peg.1021	CDS	Contig8	963994	964749	1	+	756	Transcriptional repressor of the fructose operon, DeoR family	Fructose utilization
fig|720555.3.peg.1022	CDS	Contig8	964746	965657	3	+	912	Tagatose-6-phosphate kinase (EC 2.7.1.144) / 1-phosphofructokinase (EC 2.7.1.56)	Lactose and Galactose Uptake and Utilization; <br>Fructose utilization
fig|720555.3.peg.1023	CDS	Contig8	965671	967572	1	+	1902	PTS system, fructose-specific IIA component (EC 2.7.1.69) / PTS system, fructose-specific IIB component (EC 2.7.1.69) / PTS system, fructose-specific IIC component (EC 2.7.1.69)	Fructose utilization; <br>Fructose utilization; <br>Fructose utilization
fig|720555.3.peg.1024	CDS	Contig8	967717	968298	1	+	582	Signal peptidase I (EC 3.4.21.89)	CBSS-176299.4.peg.1292; <br>Signal peptidase
fig|720555.3.peg.1025	CDS	Contig8	968611	968342	-1	-	270	unknown	- none -
fig|720555.3.peg.1026	CDS	Contig8	968781	970400	3	+	1620	ABC transporter, ATP-binding protein	- none -
fig|720555.3.peg.1027	CDS	Contig8	970669	971619	1	+	951	2-dehydropantoate 2-reductase (EC 1.1.1.169)	Coenzyme A Biosynthesis
fig|720555.3.peg.1028	CDS	Contig8	972882	971650	-3	-	1233	Aminopeptidase S (Leu, Val, Phe, Tyr preference) (EC 3.4.11.24)	Aminopeptidases (EC 3.4.11.-); <br>CBSS-176280.1.peg.1561
fig|720555.3.peg.1029	CDS	Contig8	973118	972984	-2	-	135	hypothetical protein	- none -
fig|720555.3.peg.1030	CDS	Contig8	974239	973220	-1	-	1020	Cell-shape determining protein MreBH	Bacterial Cytoskeleton
fig|720555.3.peg.1031	CDS	Contig8	974510	974788	2	+	279	Putative transition state regulator Abh	Poly-gamma-glutamate biosynthesis
fig|720555.3.peg.1032	CDS	Contig8	975000	976286	3	+	1287	Sporulation kinase C (EC 2.7.13.3)	Sporulation gene orphans
fig|720555.3.peg.1033	CDS	Contig8	976299	977138	3	+	840	hypothetical protein	- none -
fig|720555.3.peg.1034	CDS	Contig8	977188	977853	1	+	666	Trk system potassium uptake protein TrkA	Potassium homeostasis
fig|720555.3.peg.1035	CDS	Contig8	978022	979749	1	+	1728	Adenine deaminase (EC 3.5.4.2)	Purine conversions
fig|720555.3.peg.1036	CDS	Contig8	981450	979783	-3	-	1668	hypothetical protein	- none -
fig|720555.3.peg.1037	CDS	Contig8	981665	981456	-2	-	210	Protein of unknown function DUF1447	Bacterial RNA-metabolizing Zn-dependent hydrolases; <br>Conserved gene cluster associated with Met-tRNA formyltransferase
fig|720555.3.peg.1038	CDS	Contig8	981689	981841	2	+	153	hypothetical protein	- none -
fig|720555.3.peg.1039	CDS	Contig8	981908	982030	2	+	123	hypothetical protein	- none -
fig|720555.3.peg.1040	CDS	Contig8	982056	982829	3	+	774	Hydrolase (HAD superfamily) in cluster with DUF1447	Bacterial RNA-metabolizing Zn-dependent hydrolases; <br>Conserved gene cluster associated with Met-tRNA formyltransferase; <br>Queuosine-Archaeosine Biosynthesis
fig|720555.3.peg.1041	CDS	Contig8	983424	982870	-3	-	555	Peptide deformylase (EC 3.5.1.88)	Bacterial RNA-metabolizing Zn-dependent hydrolases; <br>Conserved gene cluster associated with Met-tRNA formyltransferase; <br>Dehydrogenase complexes
fig|720555.3.peg.1042	CDS	Contig8	983684	983532	-2	-	153	hypothetical protein	- none -
fig|720555.3.peg.1043	CDS	Contig8	983911	984603	1	+	693	hypothetical protein	- none -
fig|720555.3.peg.1044	CDS	Contig8	985021	986136	1	+	1116	Pyruvate dehydrogenase E1 component alpha subunit (EC 1.2.4.1)	Pyruvate metabolism II: acetyl-CoA, acetogenesis from pyruvate; <br>Dehydrogenase complexes
fig|720555.3.peg.1045	CDS	Contig8	986140	987117	1	+	978	Pyruvate dehydrogenase E1 component beta subunit (EC 1.2.4.1)	Pyruvate metabolism II: acetyl-CoA, acetogenesis from pyruvate; <br>Dehydrogenase complexes
fig|720555.3.peg.1046	CDS	Contig8	987249	988583	3	+	1335	Dihydrolipoamide acetyltransferase component of pyruvate dehydrogenase complex (EC 2.3.1.12)	Pyruvate metabolism II: acetyl-CoA, acetogenesis from pyruvate; <br>Lipoic acid metabolism; <br>Dehydrogenase complexes
fig|720555.3.peg.1047	CDS	Contig8	988588	990000	1	+	1413	Dihydrolipoamide dehydrogenase of pyruvate dehydrogenase complex (EC 1.8.1.4)	Pyruvate metabolism II: acetyl-CoA, acetogenesis from pyruvate; <br>Dehydrogenase complexes; <br>TCA Cycle
fig|720555.3.peg.1048	CDS	Contig8	990425	990051	-2	-	375	small peptidoglycan-associated lipoprotein	- none -
fig|720555.3.peg.1049	CDS	Contig8	990685	991518	1	+	834	polysaccharide deacetylase	- none -
fig|720555.3.peg.1050	CDS	Contig8	991658	991777	2	+	120	hypothetical protein	- none -
fig|720555.3.peg.1051	CDS	Contig8	993295	991823	-1	-	1473	Arginine decarboxylase (EC 4.1.1.19)	Polyamine Metabolism; <br>Arginine and Ornithine Degradation
fig|720555.3.peg.1052	CDS	Contig8	993476	993742	2	+	267	putative transcriptional regulator	- none -
fig|720555.3.peg.1053	CDS	Contig8	994417	993779	-1	-	639	hypothetical protein	- none -
fig|720555.3.peg.1054	CDS	Contig8	994668	994844	3	+	177	hypothetical protein	- none -
fig|720555.3.peg.1055	CDS	Contig8	994987	995784	1	+	798	Inositol-1-monophosphatase (EC 3.1.3.25)	Flavohaemoglobin; <br>Inositol catabolism
fig|720555.3.peg.1056	CDS	Contig8	995771	996241	2	+	471	unknown	- none -
fig|720555.3.peg.1057	CDS	Contig8	997326	996412	-3	-	915	O-Methyltransferase involved in polyketide biosynthesis	- none -
fig|720555.3.peg.1058	CDS	Contig8	999278	997713	-2	-	1566	Zinc metalloproteinase precursor (EC 3.4.24.29) / aureolysin	Listeria Pathogenicity Island LIPI-1 extended
fig|720555.3.peg.1059	CDS	Contig8	999653	1001605	2	+	1953	unknown	- none -
fig|720555.3.peg.1060	CDS	Contig8	1001595	1001870	3	+	276	unknown	- none -
fig|720555.3.peg.1061	CDS	Contig8	1001855	1002391	2	+	537	RNA polymerase sigma factor RpoE	Transcription initiation, bacterial sigma factors
fig|720555.3.peg.1062	CDS	Contig8	1002388	1002681	1	+	294	unknown	- none -
fig|720555.3.peg.1063	CDS	Contig8	1003337	1002726	-2	-	612	Sodium/calcium exchanger membrane region	- none -
fig|720555.3.peg.1064	CDS	Contig8	1003803	1003615	-3	-	189	hypothetical protein	- none -
fig|720555.3.peg.1065	CDS	Contig8	1003919	1005757	2	+	1839	GTP-binding protein TypA/BipA	Universal GTPases
fig|720555.3.peg.1066	CDS	Contig8	1005813	1006130	3	+	318	hypothetical protein	- none -
fig|720555.3.peg.1067	CDS	Contig8	1006503	1006297	-3	-	207	hypothetical protein	- none -
fig|720555.3.peg.1068	CDS	Contig8	1007225	1006596	-2	-	630	lipoprotein, putative	- none -
fig|720555.3.peg.1069	CDS	Contig8	1007381	1008709	2	+	1329	Predicted ATPase related to phosphate starvation-inducible protein PhoH	Phosphate metabolism
fig|720555.3.peg.1070	CDS	Contig8	1009203	1008718	-3	-	486	hypothetical protein	- none -
fig|720555.3.peg.1071	CDS	Contig8	1009307	1010236	2	+	930	Glutaminase (EC 3.5.1.2)	Glutamine, Glutamate, Aspartate and Asparagine Biosynthesis
fig|720555.3.peg.1072	CDS	Contig8	1010344	1010625	1	+	282	Conserved hypothetical protein YlaN	- none -
fig|720555.3.peg.1073	CDS	Contig8	1010824	1012035	1	+	1212	Cell division protein FtsW	Bacterial Cytoskeleton; <br>Bacterial Cell Division
fig|720555.3.peg.1074	CDS	Contig8	1012107	1015556	3	+	3450	Pyruvate carboxyl transferase (EC 6.4.1.1)	Pyruvate metabolism I: anaplerotic reactions, PEP
fig|720555.3.peg.1075	CDS	Contig8	1016762	1015836	-2	-	927	Heme A synthase, cytochrome oxidase biogenesis protein Cox15-CtaA	Biogenesis of cytochrome c oxidases
fig|720555.3.peg.1076	CDS	Contig8	1017122	1018039	2	+	918	Heme O synthase, protoheme IX farnesyltransferase (EC 2.5.1.-) COX10-CtaB	Flavohaemoglobin; <br>Biogenesis of cytochrome c oxidases
fig|720555.3.peg.1077	CDS	Contig8	1018363	1019358	1	+	996	Cytochrome c oxidase polypeptide II (EC 1.9.3.1)	Terminal cytochrome C oxidases
fig|720555.3.peg.1078	CDS	Contig8	1019392	1021260	1	+	1869	Cytochrome c oxidase polypeptide I (EC 1.9.3.1)	Terminal cytochrome C oxidases
fig|720555.3.peg.1079	CDS	Contig8	1021257	1021883	3	+	627	Cytochrome c oxidase polypeptide III (EC 1.9.3.1)	Terminal cytochrome C oxidases
fig|720555.3.peg.1080	CDS	Contig8	1021886	1022218	2	+	333	Cytochrome c oxidase, subunit IV (EC 1.9.3.1)	Terminal cytochrome C oxidases
fig|720555.3.peg.1081	CDS	Contig8	1022237	1023139	2	+	903	CtaG protein	- none -
fig|720555.3.peg.1082	CDS	Contig8	1023537	1023178	-3	-	360	Phenylalanyl-tRNA synthetase alpha subunit	- none -
fig|720555.3.peg.1083	CDS	Contig8	1023683	1024132	2	+	450	CBS domain protein	- none -
fig|720555.3.peg.1084	CDS	Contig8	1024229	1025266	2	+	1038	Allergen V5/Tpx-1 related	- none -
fig|720555.3.peg.1085	CDS	Contig8	1025458	1025859	1	+	402	BH2601 unknown conserved protein in B. subtilis	- none -
fig|720555.3.peg.1086	CDS	Contig8	1025875	1026114	1	+	240	BH2600 unknown conserved protein in B. subtilis	- none -
fig|720555.3.peg.1087	CDS	Contig8	1026199	1026603	1	+	405	hypothetical protein	- none -
fig|720555.3.peg.1088	CDS	Contig8	1026657	1027106	3	+	450	ComK regulator	- none -
fig|720555.3.peg.1089	CDS	Contig8	1027224	1027439	3	+	216	hypothetical Cytosolic Protein	- none -
fig|720555.3.peg.1090	CDS	Contig8	1027539	1027688	3	+	150	hypothetical protein	- none -
fig|720555.3.peg.1091	CDS	Contig8	1027777	1028334	1	+	558	Ribosomal RNA small subunit methyltransferase D (EC 2.1.1.-)	CBSS-269801.1.peg.1715
fig|720555.3.peg.1092	CDS	Contig8	1028336	1028821	2	+	486	Phosphopantetheine adenylyltransferase (EC 2.7.7.3)	CBSS-269801.1.peg.1715; <br>Coenzyme A Biosynthesis
fig|720555.3.peg.1093	CDS	Contig8	1030064	1028838	-2	-	1227	FIGfam003972: membrane protein	CBSS-269801.1.peg.1715
fig|720555.3.peg.1094	CDS	Contig8	1030241	1031020	2	+	780	Serine protease (EC 3.4.21.-)	CBSS-269801.1.peg.1715
fig|720555.3.peg.1095	CDS	Contig8	1031025	1032056	3	+	1032	Lon-like protease with PDZ domain	Proteasome bacterial
fig|720555.3.peg.1096	CDS	Contig8	1033320	1032073	-3	-	1248	FIG007079: UPF0348 protein family	CBSS-269801.1.peg.1715
fig|720555.3.peg.1097	CDS	Contig8	1033499	1033323	-2	-	177	hypothetical protein	- none -
fig|720555.3.peg.1098	CDS	Contig8	1033527	1034045	3	+	519	COG1399 protein in cluster with ribosomal protein L32p, Firmicutes subfamily	- none -
fig|720555.3.peg.1099	CDS	Contig8	1034067	1034246	3	+	180	LSU ribosomal protein L32p	- none -
fig|720555.3.peg.1100	CDS	Contig8	1034397	1034990	3	+	594	Prespore specific transcriptional activator RsfA	- none -
fig|720555.3.peg.1101	CDS	Contig8	1035517	1035035	-1	-	483	Uncharacterized N-acetyltransferase BT9727_3663 (EC 2.3.1.-)	- none -
fig|720555.3.peg.1102	CDS	Contig8	1035683	1036579	2	+	897	2-dehydropantoate 2-reductase (EC 1.1.1.169)	Coenzyme A Biosynthesis
fig|720555.3.peg.1103	CDS	Contig8	1036650	1038269	3	+	1620	BH2577 unknown conserved protein in B. subtilis	- none -
fig|720555.3.peg.1104	CDS	Contig8	1038395	1038826	2	+	432	Cell division protein MraZ	Bacterial Cytoskeleton; <br>Bacterial Cell Division
fig|720555.3.peg.1105	CDS	Contig8	1038895	1039830	1	+	936	rRNA small subunit methyltransferase H	- none -
fig|720555.3.peg.1106	CDS	Contig8	1039870	1040223	1	+	354	Cell division protein FtsL	Bacterial Cytoskeleton; <br>Bacterial Cell Division
fig|720555.3.peg.1107	CDS	Contig8	1040229	1042370	3	+	2142	Penicillin-binding protein 2B	- none -
fig|720555.3.peg.1108	CDS	Contig8	1042507	1044426	1	+	1920	Cell division protein FtsI [Peptidoglycan synthetase] (EC 2.4.1.129) / Stage V sporulation protein D (Sporulation-specific penicillin-binding protein)	Sporulation gene orphans; <br>Peptidoglycan Biosynthesis; <br>Flagellum in Campylobacter; <br>Bacterial Cytoskeleton; <br>Bacterial Cell Division
fig|720555.3.peg.1109	CDS	Contig8	1044612	1046084	3	+	1473	UDP-N-acetylmuramoylalanyl-D-glutamate--2,6-diaminopimelate ligase (EC 6.3.2.13)	Peptidoglycan Biosynthesis
fig|720555.3.peg.1110	CDS	Contig8	1046207	1047181	2	+	975	Phospho-N-acetylmuramoyl-pentapeptide-transferase (EC 2.7.8.13)	Peptidoglycan Biosynthesis
fig|720555.3.peg.1111	CDS	Contig8	1047182	1048537	2	+	1356	UDP-N-acetylmuramoylalanine--D-glutamate ligase (EC 6.3.2.9)	Peptidoglycan Biosynthesis
fig|720555.3.peg.1112	CDS	Contig8	1048576	1049697	1	+	1122	Cell division protein FtsW / Stage V sporulation protein E	Sporulation gene orphans; <br>Bacterial Cytoskeleton; <br>Bacterial Cell Division
fig|720555.3.peg.1113	CDS	Contig8	1049826	1050920	3	+	1095	UDP-N-acetylglucosamine--N-acetylmuramyl-(pentapeptide) pyrophosphoryl-undecaprenol N-acetylglucosamine transferase (EC 2.4.1.227)	Peptidoglycan Biosynthesis
fig|720555.3.peg.1114	CDS	Contig8	1050953	1051864	2	+	912	UDP-N-acetylenolpyruvoylglucosamine reductase (EC 1.1.1.158)	Peptidoglycan Biosynthesis; <br>UDP-N-acetylmuramate from Fructose-6-phosphate Biosynthesis
fig|720555.3.peg.1115	CDS	Contig8	1051992	1052777	3	+	786	Cell division protein FtsQ	Bacterial Cytoskeleton
fig|720555.3.peg.1116	CDS	Contig8	1052780	1053475	2	+	696	Division initiation protein	- none -
fig|720555.3.peg.1117	CDS	Contig8	1053555	1054205	3	+	651	YLXX protein	- none -
fig|720555.3.peg.1118	CDS	Contig8	1054224	1054589	3	+	366	FIG025307: hypothetical protein	- none -
fig|720555.3.peg.1119	CDS	Contig8	1054767	1056080	3	+	1314	Cell division protein FtsA	Bacterial Cytoskeleton; <br>Cell Division Cluster; <br>Bacterial Cell Division
fig|720555.3.peg.1120	CDS	Contig8	1056116	1057261	2	+	1146	Cell division protein FtsZ (EC 3.4.24.-)	Bacterial Cytoskeleton; <br>Cell Division Cluster; <br>Bacterial Cell Division
fig|720555.3.peg.1121	CDS	Contig8	1057655	1061896	2	+	4242	bacillopeptidase F	- none -
fig|720555.3.peg.1122	CDS	Contig8	1062052	1063050	1	+	999	Sporulation sigma-E factor processing peptidase (SpoIIGA)	Sporulation gene orphans
fig|720555.3.peg.1123	CDS	Contig8	1063113	1063832	3	+	720	RNA polymerase sporulation specific sigma factor SigE	Sporulation gene orphans; <br>Transcription initiation, bacterial sigma factors
fig|720555.3.peg.1124	CDS	Contig8	1063971	1064753	3	+	783	RNA polymerase sporulation specific sigma factor SigG	Sporulation gene orphans; <br>Transcription initiation, bacterial sigma factors; <br>SigmaB stress responce regulation
fig|720555.3.peg.1125	CDS	Contig8	1064911	1065705	1	+	795	ABC transporter, ATP-binding protein	- none -
fig|720555.3.peg.1126	CDS	Contig8	1065855	1067192	3	+	1338	Acetylornithine deacetylase (EC 3.5.1.16) / YlmB	Arginine Biosynthesis extended
fig|720555.3.peg.1127	CDS	Contig8	1067269	1067514	1	+	246	FIG011856: hypothetical protein	- none -
fig|720555.3.peg.1128	CDS	Contig8	1067724	1068515	3	+	792	COG1496: Uncharacterized conserved protein	- none -
fig|720555.3.peg.1129	CDS	Contig8	1068522	1069214	3	+	693	FIG003955: protein of unknown function	Cell Division Cluster; <br>A Hypothetical Protein Related to Proline Metabolism
fig|720555.3.peg.1130	CDS	Contig8	1069211	1069663	2	+	453	FIG001960: FtsZ-interacting protein related to cell division	Cell Division Cluster
fig|720555.3.peg.1131	CDS	Contig8	1069671	1069949	3	+	279	FIG013736: cell division protein (putative)	Cell Division Cluster
fig|720555.3.peg.1132	CDS	Contig8	1070009	1070785	2	+	777	FIG001583: hypothetical protein, contains S4-like RNA binding domain	Cell Division Cluster
fig|720555.3.peg.1133	CDS	Contig8	1070880	1071374	3	+	495	Cell division initiation protein DivIVA	Bacterial Cytoskeleton; <br>Cell Division Cluster; <br>Bacterial Cell Division
fig|720555.3.peg.1134	CDS	Contig8	1071607	1071747	1	+	141	tRNA (uridine-5-oxyacetic acid methyl ester) 34 synthase	- none -
fig|720555.3.peg.1135	CDS	Contig8	1071723	1074485	3	+	2763	Isoleucyl-tRNA synthetase (EC 6.1.1.5)	tRNA aminoacylation, Ile; <br>Cell Division Cluster
fig|720555.3.peg.1136	CDS	Contig8	1074633	1075007	3	+	375	hypothetical protein	- none -
fig|720555.3.peg.1137	CDS	Contig8	1075155	1075619	3	+	465	Lipoprotein signal peptidase (EC 3.4.23.36)	Signal peptidase; <br>Lipoprotein Biosynthesis
fig|720555.3.peg.1138	CDS	Contig8	1075621	1076532	1	+	912	Ribosomal large subunit pseudouridine synthase D (EC 4.2.1.70)	Ribosome biogenesis bacterial
fig|720555.3.peg.1139	CDS	Contig8	1076713	1077258	1	+	546	Uracil phosphoribosyltransferase (EC 2.4.2.9) / Pyrimidine operon regulatory protein PyrR	LMPTP YwlE cluster; <br>De Novo Pyrimidine Synthesis; <br>De Novo Pyrimidine Synthesis; <br>pyrimidine conversions
fig|720555.3.peg.1140	CDS	Contig8	1077429	1078733	3	+	1305	Uracil permease	De Novo Pyrimidine Synthesis
fig|720555.3.peg.1141	CDS	Contig8	1078778	1078912	2	+	135	hypothetical protein	- none -
fig|720555.3.peg.1142	CDS	Contig8	1078887	1079801	3	+	915	Aspartate carbamoyltransferase (EC 2.1.3.2)	De Novo Pyrimidine Synthesis
fig|720555.3.peg.1143	CDS	Contig8	1079785	1081071	1	+	1287	Dihydroorotase (EC 3.5.2.3)	Zinc regulated enzymes; <br>De Novo Pyrimidine Synthesis
fig|720555.3.peg.1144	CDS	Contig8	1081068	1082162	3	+	1095	Carbamoyl-phosphate synthase small chain (EC 6.3.5.5)	De Novo Pyrimidine Synthesis
fig|720555.3.peg.1145	CDS	Contig8	1082147	1085362	2	+	3216	Carbamoyl-phosphate synthase large chain (EC 6.3.5.5)	De Novo Pyrimidine Synthesis
fig|720555.3.peg.1146	CDS	Contig8	1085359	1086129	1	+	771	Dihydroorotate dehydrogenase electron transfer subunit (EC 1.3.3.1)	De Novo Pyrimidine Synthesis
fig|720555.3.peg.1147	CDS	Contig8	1086129	1087064	3	+	936	Dihydroorotate dehydrogenase, catalytic subunit (EC 1.3.3.1)	De Novo Pyrimidine Synthesis
fig|720555.3.peg.1148	CDS	Contig8	1087030	1087752	1	+	723	Orotidine 5&#39;-phosphate decarboxylase (EC 4.1.1.23)	De Novo Pyrimidine Synthesis
fig|720555.3.peg.1149	CDS	Contig8	1087749	1088381	3	+	633	Orotate phosphoribosyltransferase (EC 2.4.2.10)	De Novo Pyrimidine Synthesis
fig|720555.3.peg.1150	CDS	Contig8	1088861	1089562	2	+	702	Phosphoadenylyl-sulfate reductase [thioredoxin] (EC 1.8.4.8) / Adenylyl-sulfate reductase [thioredoxin] (EC 1.8.4.10)	Inorganic Sulfur Assimilation; <br>Inorganic Sulfur Assimilation; <br>Cysteine Biosynthesis
fig|720555.3.peg.1151	CDS	Contig8	1089574	1090638	1	+	1065	Sulfate permease, Pit-type	Inorganic Sulfur Assimilation
fig|720555.3.peg.1152	CDS	Contig8	1090687	1091835	1	+	1149	Sulfate adenylyltransferase, dissimilatory-type (EC 2.7.7.4)	Inorganic Sulfur Assimilation
fig|720555.3.peg.1153	CDS	Contig8	1091848	1092441	1	+	594	Adenylylsulfate kinase (EC 2.7.1.25)	Inorganic Sulfur Assimilation; <br>Cysteine Biosynthesis
fig|720555.3.peg.1154	CDS	Contig8	1092650	1093423	2	+	774	Uroporphyrinogen-III methyltransferase (EC 2.1.1.107)	Heme and Siroheme Biosynthesis
fig|720555.3.peg.1155	CDS	Contig8	1093425	1094210	3	+	786	Sirohydrochlorin ferrochelatase (EC 4.99.1.4)	Heme and Siroheme Biosynthesis
fig|720555.3.peg.1156	CDS	Contig8	1094191	1094679	1	+	489	Siroheme synthase / Precorrin-2 oxidase (EC 1.3.1.76)	Heme and Siroheme Biosynthesis
fig|720555.3.peg.1157	CDS	Contig8	1096490	1094778	-2	-	1713	Fibronectin/fibrinogen-binding protein	- none -
fig|720555.3.peg.1158	CDS	Contig8	1096615	1099287	1	+	2673	cation-transporting ATPase, E1-E2 family	- none -
fig|720555.3.peg.1159	CDS	Contig8	1099360	1100244	1	+	885	Protein YicC	CBSS-323097.3.peg.2594
fig|720555.3.peg.1160	CDS	Contig8	1100321	1100590	2	+	270	FIG003307: hypothetical protein	CBSS-323097.3.peg.2594
fig|720555.3.peg.1161	CDS	Contig8	1100598	1101212	3	+	615	Guanylate kinase (EC 2.7.4.8)	CBSS-323097.3.peg.2594; <br>Purine conversions
fig|720555.3.peg.1162	CDS	Contig8	1101216	1101419	3	+	204	DNA-directed RNA polymerase omega subunit (EC 2.7.7.6)	CBSS-176299.4.peg.1292; <br>RNA polymerase bacterial
fig|720555.3.peg.1163	CDS	Contig8	1101510	1102730	3	+	1221	Phosphopantothenoylcysteine decarboxylase (EC 4.1.1.36) / Phosphopantothenoylcysteine synthetase (EC 6.3.2.5)	Coenzyme A Biosynthesis; <br>Coenzyme A Biosynthesis
fig|720555.3.peg.1164	CDS	Contig8	1102727	1105144	2	+	2418	Helicase PriA essential for oriC/DnaA-independent DNA replication	Conserved gene cluster associated with Met-tRNA formyltransferase
fig|720555.3.peg.1165	CDS	Contig8	1105170	1105652	3	+	483	Peptide deformylase (EC 3.5.1.88)	Bacterial RNA-metabolizing Zn-dependent hydrolases; <br>Conserved gene cluster associated with Met-tRNA formyltransferase; <br>Dehydrogenase complexes
fig|720555.3.peg.1166	CDS	Contig8	1105657	1106610	1	+	954	Methionyl-tRNA formyltransferase (EC 2.1.2.9)	Conserved gene cluster associated with Met-tRNA formyltransferase; <br>Folate Biosynthesis
fig|720555.3.peg.1167	CDS	Contig8	1106597	1107940	2	+	1344	Ribosomal RNA small subunit methyltransferase B (EC 2.1.1.-)	Conserved gene cluster associated with Met-tRNA formyltransferase
fig|720555.3.peg.1168	CDS	Contig8	1107944	1109035	2	+	1092	Ribosomal RNA large subunit methyltransferase N (EC 2.1.1.-)	Conserved gene cluster associated with Met-tRNA formyltransferase
fig|720555.3.peg.1169	CDS	Contig8	1109035	1109805	1	+	771	Protein serine/threonine phosphatase PrpC, regulation of stationary phase	Conserved gene cluster associated with Met-tRNA formyltransferase
fig|720555.3.peg.1170	CDS	Contig8	1109799	1111739	3	+	1941	Serine/threonine protein kinase PrkC, regulator of stationary phase	Conserved gene cluster associated with Met-tRNA formyltransferase; <br>A Gram-positive cluster that relates ribosomal protein L28P to a set of uncharacterized proteins
fig|720555.3.peg.1171	CDS	Contig8	1111754	1112656	2	+	903	Ribosome small subunit-stimulated GTPase EngC	A Gram-positive cluster that relates ribosomal protein L28P to a set of uncharacterized proteins; <br>Universal GTPases
fig|720555.3.peg.1172	CDS	Contig8	1112658	1113308	3	+	651	Ribulose-phosphate 3-epimerase (EC 5.1.3.1)	Conserved gene cluster associated with Met-tRNA formyltransferase; <br>Pentose phosphate pathway; <br>Formaldehyde assimilation: Ribulose monophosphate pathway; <br>A Gram-positive cluster that relates ribosomal protein L28P to a set of uncharacterized proteins
fig|720555.3.peg.1173	CDS	Contig8	1113392	1114036	2	+	645	Thiamin pyrophosphokinase (EC 2.7.6.2)	Thiamin biosynthesis; <br>A Gram-positive cluster that relates ribosomal protein L28P to a set of uncharacterized proteins
fig|720555.3.peg.1174	CDS	Contig8	1114462	1114274	-1	-	189	LSU ribosomal protein L28p	A Gram-positive cluster that relates ribosomal protein L28P to a set of uncharacterized proteins
fig|720555.3.peg.1175	CDS	Contig8	1114731	1115093	3	+	363	FIG001802: Putative alkaline-shock protein	A Gram-positive cluster that relates ribosomal protein L28P to a set of uncharacterized proteins
fig|720555.3.peg.1176	CDS	Contig8	1115109	1116782	3	+	1674	Dihydroxyacetone kinase family protein	Glycerolipid and Glycerophospholipid Metabolism in Bacteria; <br>A Gram-positive cluster that relates ribosomal protein L28P to a set of uncharacterized proteins
fig|720555.3.peg.1177	CDS	Contig8	1116930	1117592	3	+	663	L-serine dehydratase, beta subunit (EC 4.3.1.17)	Pyruvate Alanine Serine Interconversions; <br>Glycine and Serine Utilization
fig|720555.3.peg.1178	CDS	Contig8	1117615	1118514	1	+	900	L-serine dehydratase, alpha subunit (EC 4.3.1.17)	Pyruvate Alanine Serine Interconversions; <br>Glycine and Serine Utilization
fig|720555.3.peg.1179	CDS	Contig8	1118495	1120540	2	+	2046	ATP-dependent DNA helicase RecG (EC 3.6.1.-)	A Gram-positive cluster that relates ribosomal protein L28P to a set of uncharacterized proteins; <br>Transcription factors bacterial
fig|720555.3.peg.1180	CDS	Contig8	1120647	1121213	3	+	567	Transcription factor fapR	- none -
fig|720555.3.peg.1181	CDS	Contig8	1121227	1122225	1	+	999	Phosphate:acyl-ACP acyltransferase PlsX	Glycerolipid and Glycerophospholipid Metabolism in Bacteria
fig|720555.3.peg.1182	CDS	Contig8	1122244	1123200	1	+	957	Malonyl CoA-acyl carrier protein transacylase (EC 2.3.1.39)	Fatty Acid Biosynthesis FASII
fig|720555.3.peg.1183	CDS	Contig8	1123190	1123930	2	+	741	3-oxoacyl-[acyl-carrier protein] reductase (EC 1.1.1.100)	Fatty Acid Biosynthesis FASII
fig|720555.3.peg.1184	CDS	Contig8	1124015	1124248	2	+	234	Acyl carrier protein	Glycerolipid and Glycerophospholipid Metabolism in Bacteria; <br>Fatty Acid Biosynthesis FASII
fig|720555.3.peg.1185	CDS	Contig8	1124388	1125137	3	+	750	Ribonuclease III (EC 3.1.26.3)	CBSS-176299.4.peg.1292; <br>RNA processing and degradation, bacterial; <br>Two cell division clusters relating to chromosome partitioning
fig|720555.3.peg.1186	CDS	Contig8	1125231	1128791	3	+	3561	Chromosome partition protein smc	Two cell division clusters relating to chromosome partitioning
fig|720555.3.peg.1187	CDS	Contig8	1128811	1129800	1	+	990	Signal recognition particle receptor protein FtsY (=alpha subunit) (TC 3.A.5.1.1)	Two cell division clusters relating to chromosome partitioning; <br>Universal GTPases; <br>Bacterial Cell Division
fig|720555.3.peg.1188	CDS	Contig8	1129956	1129831	-3	-	126	hypothetical protein	- none -
fig|720555.3.peg.1189	CDS	Contig8	1130098	1130433	1	+	336	Signal recognition particle associated protein	Two cell division clusters relating to chromosome partitioning
fig|720555.3.peg.1190	CDS	Contig8	1130447	1131787	2	+	1341	Signal recognition particle, subunit Ffh SRP54 (TC 3.A.5.1.1)	Two cell division clusters relating to chromosome partitioning; <br>Universal GTPases
fig|720555.3.peg.1191	CDS	Contig8	1131893	1132165	2	+	273	SSU ribosomal protein S16p	KH domain RNA binding protein YlqC
fig|720555.3.peg.1192	CDS	Contig8	1132165	1132410	1	+	246	KH domain RNA binding protein YlqC	KH domain RNA binding protein YlqC
fig|720555.3.peg.1193	CDS	Contig8	1132540	1132926	1	+	387	unknown	- none -
fig|720555.3.peg.1194	CDS	Contig8	1132931	1133455	2	+	525	16S rRNA processing protein RimM	KH domain RNA binding protein YlqC; <br>Ribosome biogenesis bacterial
fig|720555.3.peg.1195	CDS	Contig8	1133452	1134183	1	+	732	tRNA (Guanine37-N1) -methyltransferase (EC 2.1.1.31)	tRNA modification Archaea; <br>Ribosome biogenesis bacterial
fig|720555.3.peg.1196	CDS	Contig8	1134255	1134668	3	+	414	LSU ribosomal protein L19p	- none -
fig|720555.3.peg.1197	CDS	Contig8	1134829	1135674	1	+	846	50S ribosomal subunit maturation GTPase RbgA (B. subtilis YlqF)	Conserved gene cluster associated with Met-tRNA formyltransferase; <br>Universal GTPases
fig|720555.3.peg.1198	CDS	Contig8	1135745	1136512	2	+	768	Ribonuclease HII (EC 3.1.26.4)	Conserved gene cluster associated with Met-tRNA formyltransferase; <br>Ribonuclease H
fig|720555.3.peg.1199	CDS	Contig8	1136533	1138281	1	+	1749	hypothetical protein	- none -
fig|720555.3.peg.1200	CDS	Contig8	1138278	1138559	3	+	282	flagellar biosynthesis	- none -
fig|720555.3.peg.1201	CDS	Contig8	1138732	1139889	1	+	1158	Succinyl-CoA ligase [ADP-forming] beta chain (EC 6.2.1.5)	Dehydrogenase complexes; <br>TCA Cycle
fig|720555.3.peg.1202	CDS	Contig8	1139918	1140820	2	+	903	Succinyl-CoA ligase [ADP-forming] alpha chain (EC 6.2.1.5)	Dehydrogenase complexes; <br>TCA Cycle
fig|720555.3.peg.1203	CDS	Contig8	1140882	1141781	3	+	900	Rossmann fold nucleotide-binding protein Smf possibly involved in DNA uptake	Conserved gene cluster associated with Met-tRNA formyltransferase
fig|720555.3.peg.1204	CDS	Contig8	1141970	1144045	2	+	2076	DNA topoisomerase I (EC 5.99.1.2)	Conserved gene cluster associated with Met-tRNA formyltransferase
fig|720555.3.peg.1205	CDS	Contig8	1144121	1145428	2	+	1308	tRNA:m(5)U-54 MTase gid	Conserved gene cluster associated with Met-tRNA formyltransferase
fig|720555.3.peg.1206	CDS	Contig8	1145495	1146409	2	+	915	Site-specific tyrosine recombinase	Proteasome bacterial
fig|720555.3.peg.1207	CDS	Contig8	1146423	1146968	3	+	546	ATP-dependent protease HslV (EC 3.4.25.-)	Proteasome bacterial; <br>Proteolysis in bacteria, ATP-dependent
fig|720555.3.peg.1208	CDS	Contig8	1146985	1148388	1	+	1404	ATP-dependent hsl protease ATP-binding subunit HslU	Proteasome bacterial; <br>Proteolysis in bacteria, ATP-dependent
fig|720555.3.peg.1209	CDS	Contig8	1148426	1149205	2	+	780	GTP-sensing transcriptional pleiotropic repressor codY	Conserved gene cluster associated with Met-tRNA formyltransferase
fig|720555.3.peg.1210	CDS	Contig8	1149626	1150015	2	+	390	Flagellar basal-body rod protein FlgB	Flagellum in Campylobacter
fig|720555.3.peg.1211	CDS	Contig8	1150015	1150464	1	+	450	Flagellar basal-body rod protein FlgC	Flagellum in Campylobacter
fig|720555.3.peg.1212	CDS	Contig8	1150475	1150795	2	+	321	Flagellar hook-basal body complex protein FliE	Flagellum in Campylobacter
fig|720555.3.peg.1213	CDS	Contig8	1150854	1152446	3	+	1593	Flagellar M-ring protein FliF	- none -
fig|720555.3.peg.1214	CDS	Contig8	1152459	1153475	3	+	1017	Flagellar motor switch protein FliG	Bacterial Chemotaxis
fig|720555.3.peg.1215	CDS	Contig8	1153468	1154223	1	+	756	Flagellar assembly protein FliH	- none -
fig|720555.3.peg.1216	CDS	Contig8	1154220	1155536	3	+	1317	Flagellum-specific ATP synthase FliI	- none -
fig|720555.3.peg.1217	CDS	Contig8	1155539	1155982	2	+	444	Flagellar protein FliJ	- none -
fig|720555.3.peg.1218	CDS	Contig8	1155994	1156593	1	+	600	Flagellar protein FlbB	- none -
fig|720555.3.peg.1219	CDS	Contig8	1156605	1158029	3	+	1425	Flagellar hook-length control protein FliK	- none -
fig|720555.3.peg.1220	CDS	Contig8	1158026	1158454	2	+	429	Flagellar basal-body rod modification protein FlgD	- none -
fig|720555.3.peg.1221	CDS	Contig8	1158482	1159276	2	+	795	Flagellar basal-body rod protein FlgG	- none -
fig|720555.3.peg.1222	CDS	Contig8	1159318	1159533	1	+	216	Flagellar protein FlbD	- none -
fig|720555.3.peg.1223	CDS	Contig8	1159530	1159952	3	+	423	Flagellar biosynthesis protein FliL	- none -
fig|720555.3.peg.1224	CDS	Contig8	1159986	1160984	3	+	999	Flagellar motor switch protein FliM	Bacterial Chemotaxis
fig|720555.3.peg.1225	CDS	Contig8	1160974	1162113	1	+	1140	Flagellar motor switch protein FliN	Bacterial Chemotaxis
fig|720555.3.peg.1226	CDS	Contig8	1162140	1162502	3	+	363	Chemotaxis regulator - transmits chemoreceptor signals to flagelllar motor components CheY	Bacterial Chemotaxis
fig|720555.3.peg.1227	CDS	Contig8	1162517	1163179	2	+	663	Flagellar biosynthesis protein FliZ	- none -
fig|720555.3.peg.1228	CDS	Contig8	1163172	1163837	3	+	666	Flagellar biosynthesis protein FliP	- none -
fig|720555.3.peg.1229	CDS	Contig8	1163852	1164121	2	+	270	Flagellar biosynthesis protein FliQ	- none -
fig|720555.3.peg.1230	CDS	Contig8	1164129	1164908	3	+	780	Flagellar biosynthesis protein FliR	- none -
fig|720555.3.peg.1231	CDS	Contig8	1164920	1165990	2	+	1071	Flagellar biosynthesis protein FlhB	- none -
fig|720555.3.peg.1232	CDS	Contig8	1166023	1168056	1	+	2034	Flagellar biosynthesis protein FlhA	- none -
fig|720555.3.peg.1233	CDS	Contig8	1168056	1169162	3	+	1107	Flagellar biosynthesis protein FlhF	- none -
fig|720555.3.peg.1234	CDS	Contig8	1169159	1170049	2	+	891	Flagellar synthesis regulator FleN	- none -
fig|720555.3.peg.1235	CDS	Contig8	1170051	1171118	3	+	1068	Chemotaxis response regulator protein-glutamate methylesterase CheB (EC 3.1.1.61)	Bacterial Chemotaxis
fig|720555.3.peg.1236	CDS	Contig8	1171124	1173142	2	+	2019	Signal transduction histidine kinase CheA (EC 2.7.3.-)	Bacterial Chemotaxis
fig|720555.3.peg.1237	CDS	Contig8	1173164	1173640	2	+	477	Positive regulator of CheA protein activity (CheW)	Bacterial Chemotaxis
fig|720555.3.peg.1238	CDS	Contig8	1173653	1174282	2	+	630	Chemotaxis protein CheC -- inhibitor of MCP methylation	Bacterial Chemotaxis
fig|720555.3.peg.1239	CDS	Contig8	1174279	1174779	1	+	501	Chemotaxis protein CheD	Bacterial Chemotaxis
fig|720555.3.peg.1240	CDS	Contig8	1174801	1175565	1	+	765	RNA polymerase sigma factor for flagellar operon	Transcription initiation, bacterial sigma factors
fig|720555.3.peg.1241	CDS	Contig8	1175594	1176100	2	+	507	hypothetical protein	- none -
fig|720555.3.peg.1242	CDS	Contig8	1176242	1176973	2	+	732	SSU ribosomal protein S2p (SAe)	- none -
fig|720555.3.peg.1243	CDS	Contig8	1177074	1177955	3	+	882	Translation elongation factor Ts	- none -
fig|720555.3.peg.1244	CDS	Contig8	1178101	1178823	1	+	723	Uridylate kinase (EC 2.7.4.-)	- none -
fig|720555.3.peg.1245	CDS	Contig8	1178825	1179382	2	+	558	Ribosome recycling factor	- none -
fig|720555.3.peg.1246	CDS	Contig8	1179513	1180295	3	+	783	Undecaprenyl pyrophosphate synthetase (EC 2.5.1.31)	Polyprenyl Diphosphate Biosynthesis; <br>Isoprenoid Biosynthesis
fig|720555.3.peg.1247	CDS	Contig8	1180299	1181108	3	+	810	Phosphatidate cytidylyltransferase (EC 2.7.7.41)	Glycerolipid and Glycerophospholipid Metabolism in Bacteria
fig|720555.3.peg.1248	CDS	Contig8	1181167	1182318	1	+	1152	1-deoxy-D-xylulose 5-phosphate reductoisomerase (EC 1.1.1.267)	Isoprenoid Biosynthesis; <br>Nonmevalonate Branch of Isoprenoid Biosynthesis
fig|720555.3.peg.1249	CDS	Contig8	1182331	1183593	1	+	1263	Membrane-associated zinc metalloprotease	Periplasmic Stress Response
fig|720555.3.peg.1250	CDS	Contig8	1183627	1185321	1	+	1695	Prolyl-tRNA synthetase (EC 6.1.1.15) ## Bacterial type	Proline, 4-hydroxyproline uptake and utilization; <br>tRNA aminoacylation, Pro
fig|720555.3.peg.1251	CDS	Contig8	1185429	1189742	3	+	4314	DNA polymerase III alpha subunit (EC 2.7.7.7)	CBSS-269801.1.peg.809; <br>CBSS-350688.3.peg.1509
fig|720555.3.peg.1252	CDS	Contig8	1190066	1190539	2	+	474	COG0779: clustered with transcription termination protein NusA	CBSS-350688.3.peg.1509; <br>Transcription factors bacterial; <br>NusA-TFII Cluster
fig|720555.3.peg.1253	CDS	Contig8	1190571	1191689	3	+	1119	Transcription termination protein NusA	CBSS-350688.3.peg.1509; <br>Transcription factors bacterial; <br>NusA-TFII Cluster
fig|720555.3.peg.1254	CDS	Contig8	1191703	1191978	1	+	276	COG2740: Predicted nucleic-acid-binding protein implicated in transcription termination	CBSS-350688.3.peg.1509; <br>Transcription factors bacterial; <br>NusA-TFII Cluster
fig|720555.3.peg.1255	CDS	Contig8	1191980	1192282	2	+	303	ribosomal protein L7Ae family protein	CBSS-350688.3.peg.1509; <br>Transcription factors bacterial; <br>NusA-TFII Cluster
fig|720555.3.peg.1256	CDS	Contig8	1192302	1194464	3	+	2163	Translation initiation factor 2	CBSS-350688.3.peg.1509; <br>Universal GTPases; <br>NusA-TFII Cluster
fig|720555.3.peg.1257	CDS	Contig8	1194461	1194739	2	+	279	YlxP-like protein	CBSS-350688.3.peg.1509; <br>NusA-TFII Cluster
fig|720555.3.peg.1258	CDS	Contig8	1194763	1195110	1	+	348	Ribosome-binding factor A	CBSS-350688.3.peg.1509; <br>NusA-TFII Cluster
fig|720555.3.peg.1259	CDS	Contig8	1195199	1195080	-2	-	120	Transcription-repair coupling factor	Transcription factors bacterial
fig|720555.3.peg.1260	CDS	Contig8	1195200	1196129	3	+	930	tRNA pseudouridine synthase B (EC 4.2.1.70) ## tRNA Psi55	tRNA processing; <br>CBSS-350688.3.peg.1509
fig|720555.3.peg.1261	CDS	Contig8	1196149	1197105	1	+	957	Riboflavin kinase (EC 2.7.1.26) / FMN adenylyltransferase (EC 2.7.7.2)	riboflavin to FAD; <br>riboflavin to FAD; <br>Glutaredoxins; <br>Riboflavin, FMN and FAD metabolism; <br>Riboflavin, FMN and FAD metabolism; <br>CBSS-350688.3.peg.1509; <br>CBSS-350688.3.peg.1509
fig|720555.3.peg.1262	CDS	Contig8	1197256	1197525	1	+	270	SSU ribosomal protein S15p (S13e)	- none -
fig|720555.3.peg.1263	CDS	Contig8	1197698	1199815	2	+	2118	Polyribonucleotide nucleotidyltransferase (EC 2.7.7.8)	Bacterial RNA-metabolizing Zn-dependent hydrolases; <br>CBSS-350688.3.peg.1509
fig|720555.3.peg.1264	CDS	Contig8	1199932	1200891	1	+	960	FIG007013: polysaccharide deacetylase, putative	CBSS-350688.3.peg.1509
fig|720555.3.peg.1265	CDS	Contig8	1200935	1202167	2	+	1233	FIG007959: peptidase, M16 family	CBSS-350688.3.peg.1509
fig|720555.3.peg.1266	CDS	Contig8	1202250	1202507	3	+	258	FIG007697: hypothetical protein	CBSS-350688.3.peg.1509
fig|720555.3.peg.1267	CDS	Contig8	1202664	1203557	3	+	894	Dipicolinate synthase subunit A (EC 4.2.1.52)	Dipicolinate Synthesis; <br>CBSS-350688.3.peg.1509
fig|720555.3.peg.1268	CDS	Contig8	1203560	1204159	2	+	600	Dipicolinate synthase subunit B	Dipicolinate Synthesis
fig|720555.3.peg.1269	CDS	Contig8	1204285	1205325	1	+	1041	Aspartate-semialdehyde dehydrogenase (EC 1.2.1.11)	Lysine Biosynthesis DAP Pathway; <br>Threonine and Homoserine Biosynthesis
fig|720555.3.peg.1270	CDS	Contig8	1205421	1206635	3	+	1215	Aspartokinase (EC 2.7.2.4)	Lysine Biosynthesis DAP Pathway; <br>Threonine and Homoserine Biosynthesis
fig|720555.3.peg.1271	CDS	Contig8	1206666	1207535	3	+	870	Dihydrodipicolinate synthase (EC 4.2.1.52)	Lysine Biosynthesis DAP Pathway
fig|720555.3.peg.1272	CDS	Contig8	1207713	1209380	3	+	1668	Zn-dependent hydrolase, RNA-metabolising, CPSF 100 kDa analog	Bacterial RNA-metabolizing Zn-dependent hydrolases
fig|720555.3.peg.1273	CDS	Contig8	1209526	1210263	1	+	738	Translocation-enhancing protein TepA	- none -
fig|720555.3.peg.1274	CDS	Contig8	1210260	1210493	3	+	234	hypothetical protein	- none -
fig|720555.3.peg.1275	CDS	Contig8	1210604	1212961	2	+	2358	Cell division protein FtsK	Bacterial RNA-metabolizing Zn-dependent hydrolases; <br>Bacterial Cytoskeleton; <br>Unspecified monosaccharide transport cluster; <br>Bacterial Cell Division
fig|720555.3.peg.1276	CDS	Contig8	1213094	1213567	2	+	474	Transcriptional regulator in cluster with Zn-dependent hydrolase	Bacterial RNA-metabolizing Zn-dependent hydrolases; <br>Unspecified monosaccharide transport cluster
fig|720555.3.peg.1277	CDS	Contig8	1213518	1213652	3	+	135	Transcriptional regulator in cluster with Zn-dependent hydrolase	Bacterial RNA-metabolizing Zn-dependent hydrolases; <br>Unspecified monosaccharide transport cluster
fig|720555.3.peg.1278	CDS	Contig8	1213785	1215014	3	+	1230	Siderophore transport protein	- none -
fig|720555.3.peg.1279	CDS	Contig8	1215201	1215326	3	+	126	hypothetical protein	- none -
fig|720555.3.peg.1280	CDS	Contig8	1215476	1216756	2	+	1281	FIG001621: Zinc protease	CBSS-257314.1.peg.676; <br>Unspecified monosaccharide transport cluster
fig|720555.3.peg.1281	CDS	Contig8	1216753	1218039	1	+	1287	FIG009210: peptidase, M16 family	CBSS-257314.1.peg.676; <br>Unspecified monosaccharide transport cluster
fig|720555.3.peg.1282	CDS	Contig8	1218096	1218824	3	+	729	3-oxoacyl-[acyl-carrier protein] reductase paralog (EC 1.1.1.100) in cluster with unspecified monosaccharide transporter	CBSS-257314.1.peg.676; <br>Unspecified monosaccharide transport cluster
fig|720555.3.peg.1283	CDS	Contig8	1218905	1219162	2	+	258	FIG007042: hypothetical protein	Unspecified monosaccharide transport cluster
fig|720555.3.peg.1284	CDS	Contig8	1219292	1220083	2	+	792	ACT domain protein	Unspecified monosaccharide transport cluster
fig|720555.3.peg.1285	CDS	Contig8	1220102	1221019	2	+	918	Transcriptional regulator in cluster with unspecified monosaccharide ABC transport system	CBSS-257314.1.peg.676; <br>Unspecified monosaccharide transport cluster
fig|720555.3.peg.1286	CDS	Contig8	1221070	1221651	1	+	582	CDP-diacylglycerol--glycerol-3-phosphate 3-phosphatidyltransferase (EC 2.7.8.5)	Competence or DNA damage-inducible protein CinA and related protein families; <br>Glycerolipid and Glycerophospholipid Metabolism in Bacteria; <br>CBSS-257314.1.peg.676
fig|720555.3.peg.1287	CDS	Contig8	1221670	1222920	1	+	1251	Competence/damage-inducible protein CinA	Competence or DNA damage-inducible protein CinA and related protein families; <br>CBSS-257314.1.peg.676
fig|720555.3.peg.1288	CDS	Contig8	1222942	1223055	1	+	114	hypothetical protein	- none -
fig|720555.3.peg.1289	CDS	Contig8	1223092	1224135	1	+	1044	RecA protein	Competence or DNA damage-inducible protein CinA and related protein families; <br>CBSS-257314.1.peg.676; <br>DNA repair, bacterial; <br>DNA repair, bacterial RecFOR pathway
fig|720555.3.peg.1290	CDS	Contig8	1224240	1224395	3	+	156	hypothetical protein	- none -
fig|720555.3.peg.1291	CDS	Contig8	1224420	1225649	3	+	1230	penicillin-binding protein, putative	- none -
fig|720555.3.peg.1292	CDS	Contig8	1225907	1227469	2	+	1563	FIG002344: Hydrolase (HAD superfamily)	CBSS-257314.1.peg.676
fig|720555.3.peg.1293	CDS	Contig8	1227539	1228333	2	+	795	FIG006542: Phosphoesterase	CBSS-257314.1.peg.676
fig|720555.3.peg.1294	CDS	Contig8	1228533	1228793	3	+	261	Stage V sporulation protein required for dehydratation of the spore core and assembly of the coat (SpoVS)	Sporulation gene orphans; <br>SpoVS protein family
fig|720555.3.peg.1295	CDS	Contig8	1229100	1230143	3	+	1044	L-threonine 3-dehydrogenase (EC 1.1.1.103)	Threonine degradation; <br>Glycine Biosynthesis
fig|720555.3.peg.1296	CDS	Contig8	1230157	1231332	1	+	1176	2-amino-3-ketobutyrate coenzyme A ligase (EC 2.3.1.29)	Threonine degradation; <br>Glycine and Serine Utilization; <br>Glycine Biosynthesis
fig|720555.3.peg.1297	CDS	Contig8	1231508	1232155	2	+	648	Chloramphenicol acetyltransferase (EC 2.3.1.28)	- none -
fig|720555.3.peg.1298	CDS	Contig8	1232231	1233760	2	+	1530	tRNA-i(6)A37 methylthiotransferase	tRNA processing; <br>tRNA modification Archaea; <br>Methylthiotransferases
fig|720555.3.peg.1299	CDS	Contig8	1233762	1234193	3	+	432	YMCA protein	- none -
fig|720555.3.peg.1300	CDS	Contig8	1234451	1234996	2	+	546	Outer spore coat protein E	- none -
fig|720555.3.peg.1301	CDS	Contig8	1235126	1237711	2	+	2586	DNA mismatch repair protein MutS	DNA repair, bacterial MutL-MutS system
fig|720555.3.peg.1302	CDS	Contig8	1237728	1239605	3	+	1878	DNA mismatch repair protein MutL	DNA repair, bacterial MutL-MutS system
fig|720555.3.peg.1303	CDS	Contig8	1240283	1241731	2	+	1449	Pyoverdine biosynthesis related protein PvdP	- none -
fig|720555.3.peg.1304	CDS	Contig8	1242579	1242040	-3	-	540	putative membrane protein	- none -
fig|720555.3.peg.1305	CDS	Contig8	1242701	1243291	2	+	591	transcriptional regulator	- none -
fig|720555.3.peg.1306	CDS	Contig8	1243449	1243568	3	+	120	hypothetical protein	- none -
fig|720555.3.peg.1307	CDS	Contig8	1243589	1244266	2	+	678	hypothetical protein	- none -
fig|720555.3.peg.1308	CDS	Contig8	1244660	1245526	2	+	867	Malonyl CoA-acyl carrier protein transacylase (EC 2.3.1.39); Enoyl-[acyl-carrier-protein] reductase [FMN] (EC 1.3.1.9)	Fatty Acid Biosynthesis FASII; <br>Fatty Acid Biosynthesis FASII
fig|720555.3.peg.1309	CDS	Contig8	1246064	1247029	2	+	966	Malonyl CoA-acyl carrier protein transacylase (EC 2.3.1.39)	Fatty Acid Biosynthesis FASII
fig|720555.3.peg.1310	CDS	Contig8	1247036	1249399	2	+	2364	Malonyl CoA-acyl carrier protein transacylase (EC 2.3.1.39); Enoyl-[acyl-carrier-protein] reductase [FMN] (EC 1.3.1.9)	Fatty Acid Biosynthesis FASII; <br>Fatty Acid Biosynthesis FASII
fig|720555.3.peg.1311	CDS	Contig8	1249535	1249786	2	+	252	acyl carrier protein	- none -
fig|720555.3.peg.1312	CDS	Contig8	1249764	1251011	3	+	1248	3-oxoacyl-[acyl-carrier-protein] synthase (EC 2.3.1.41)	- none -
fig|720555.3.peg.1313	CDS	Contig8	1251011	1252273	2	+	1263	Hydroxymethylglutaryl-CoA synthase (EC 2.3.3.10)	Isoprenoid Biosynthesis; <br>Leucine Degradation and HMG-CoA Metabolism
fig|720555.3.peg.1314	CDS	Contig8	1252270	1253037	1	+	768	Methylglutaconyl-CoA hydratase (EC 4.2.1.18)	HMG CoA Synthesis; <br>Leucine Degradation and HMG-CoA Metabolism
fig|720555.3.peg.1315	CDS	Contig8	1253085	1253831	3	+	747	Enoyl-CoA hydratase (EC 4.2.1.17)	Butanol Biosynthesis; <br>Polyhydroxybutyrate metabolism; <br>Isoleucine degradation; <br>Valine degradation; <br>Acetyl-CoA fermentation to Butyrate
fig|720555.3.peg.1316	CDS	Contig8	1253894	1269076	2	+	15183	Long-chain-fatty-acid--CoA ligase (EC 6.2.1.3)	Biotin biosynthesis
fig|720555.3.peg.1317	CDS	Contig8	1269078	1282895	3	+	13818	polyketide synthase of type I	- none -
fig|720555.3.peg.1318	CDS	Contig8	1282914	1295885	3	+	12972	polyketide synthase	- none -
fig|720555.3.peg.1319	CDS	Contig8	1295887	1312440	1	+	16554	Polyketide synthase	- none -
fig|720555.3.peg.1320	CDS	Contig8	1312456	1320180	1	+	7725	polyketide synthase	- none -
fig|720555.3.peg.1321	CDS	Contig8	1321535	1320294	-2	-	1242	putative cytochrome P450 hydroxylase	Nitric oxide synthase
fig|720555.3.peg.1322	CDS	Contig8	1322220	1321861	-3	-	360	Uncharacterized protein ymzB	- none -
fig|720555.3.peg.1323	CDS	Contig8	1323757	1322426	-1	-	1332	alkaline serine protease	- none -
fig|720555.3.peg.1324	CDS	Contig8	1323987	1324223	3	+	237	hypothetical protein	- none -
fig|720555.3.peg.1325	CDS	Contig8	1324521	1325228	3	+	708	hypothetical protein	- none -
fig|720555.3.peg.1326	CDS	Contig8	1325352	1325804	3	+	453	YMAD protein	- none -
fig|720555.3.peg.1327	CDS	Contig8	1326165	1325818	-3	-	348	Multidrug resistance protein ebrB	- none -
fig|720555.3.peg.1328	CDS	Contig8	1326496	1326182	-1	-	315	Multidrug resistance protein EbrA	- none -
fig|720555.3.peg.1329	CDS	Contig8	1327035	1326493	-3	-	543	Transcriptional regulator, TetR family	- none -
fig|720555.3.peg.1330	CDS	Contig8	1327424	1327167	-2	-	258	hypothetical protein	- none -
fig|720555.3.peg.1331	CDS	Contig8	1327541	1327945	2	+	405	unknown	- none -
fig|720555.3.peg.1332	CDS	Contig8	1328046	1328990	3	+	945	tRNA delta(2)-isopentenylpyrophosphate transferase (EC 2.5.1.8)	tRNA processing
fig|720555.3.peg.1333	CDS	Contig8	1329030	1329251	3	+	222	RNA-binding protein Hfq	Hfl operon
fig|720555.3.peg.1334	CDS	Contig8	1329370	1329636	1	+	267	Uncharacterized protein ymzC precursor	- none -
fig|720555.3.peg.1335	CDS	Contig8	1329718	1329930	1	+	213	unknown	- none -
fig|720555.3.peg.1336	CDS	Contig8	1330198	1330590	1	+	393	Ribonucleotide reduction protein NrdI	Ribonucleotide reduction
fig|720555.3.peg.1337	CDS	Contig8	1330550	1332652	2	+	2103	Ribonucleotide reductase of class Ib (aerobic), alpha subunit (EC 1.17.4.1)	Glutathione: Redox cycle; <br>Ribonucleotide reduction
fig|720555.3.peg.1338	CDS	Contig8	1332670	1333656	1	+	987	Ribonucleotide reductase of class Ib (aerobic), beta subunit (EC 1.17.4.1)	Ribonucleotide reduction
fig|720555.3.peg.1339	CDS	Contig8	1333704	1334324	3	+	621	unknown	- none -
fig|720555.3.peg.1340	CDS	Contig8	1335133	1334369	-1	-	765	N-acetylmuramoyl-L-alanine amidase (EC 3.5.1.28)	Zinc regulated enzymes; <br>Recycling of Peptidoglycan Amino Acids; <br>Murein Hydrolases
fig|720555.3.peg.1341	CDS	Contig8	1335104	1335286	2	+	183	hypothetical protein	- none -
fig|720555.3.peg.1342	CDS	Contig8	1335439	1336407	1	+	969	Stage V sporulation protein whose disruption leads to the production of immature spores (SpoVK)	Sporulation gene orphans
fig|720555.3.peg.1343	CDS	Contig8	1336558	1337820	1	+	1263	GTP-binding protein HflX	Hfl operon; <br>Universal GTPases
fig|720555.3.peg.1344	CDS	Contig8	1337837	1339102	2	+	1266	Aluminum resistance protein	- none -
fig|720555.3.peg.1345	CDS	Contig8	1339212	1339619	3	+	408	HTH-type transcriptional regulator glnR	- none -
fig|720555.3.peg.1346	CDS	Contig8	1339677	1341011	3	+	1335	Glutamine synthetase type I (EC 6.3.1.2)	Peptidoglycan Biosynthesis; <br>Ammonia assimilation; <br>Glutamine synthetases; <br>Glutamine, Glutamate, Aspartate and Asparagine Biosynthesis
fig|720555.3.peg.1347	CDS	Contig8	1341312	1341187	-3	-	126	Myo-inositol 2-dehydrogenase (EC 1.1.1.18)	Inositol catabolism
fig|720555.3.peg.1348	CDS	Contig8	1341626	1341369	-2	-	258	phage integrase	- none -
fig|720555.3.peg.1349	CDS	Contig8	1342357	1341965	-1	-	393	hypothetical protein	- none -
fig|720555.3.peg.1350	CDS	Contig8	1342718	1343239	2	+	522	Streptothricin acetyltransferase, Streptomyces lavendulae type	Streptothricin resistance
fig|720555.3.peg.1351	CDS	Contig8	1343696	1343953	2	+	258	hypothetical protein	- none -
fig|720555.3.peg.1352	CDS	Contig8	1344516	1344980	3	+	465	unknown	- none -
fig|720555.3.peg.1353	CDS	Contig8	1345081	1346841	1	+	1761	Putative toxin component near putative ESAT-related proteins, repetitive / Repetitive hypothetical protein near ESAT cluster, SA0282 homolog	- none -
fig|720555.3.peg.1354	CDS	Contig8	1347083	1347280	2	+	198	spore coat protein, putative	- none -
fig|720555.3.peg.1355	CDS	Contig8	1347318	1347791	3	+	474	unknown	- none -
fig|720555.3.peg.1356	CDS	Contig8	1348026	1348457	3	+	432	unknown	- none -
fig|720555.3.peg.1357	CDS	Contig8	1348635	1348829	3	+	195	hypothetical protein	- none -
fig|720555.3.peg.1358	CDS	Contig8	1348886	1349023	2	+	138	hypothetical protein	- none -
fig|720555.3.peg.1359	CDS	Contig8	1349663	1350952	2	+	1290	Methionine transporter MetT	Methionine Biosynthesis; <br>Methionine Degradation
fig|720555.3.peg.1360	CDS	Contig8	1351124	1351312	2	+	189	hypothetical protein	- none -
fig|720555.3.peg.1361	CDS	Contig8	1351682	1351299	-2	-	384	hypothetical protein	- none -
fig|720555.3.peg.1362	CDS	Contig8	1352875	1352534	-1	-	342	hypothetical protein	- none -
fig|720555.3.peg.1363	CDS	Contig8	1353625	1353810	1	+	186	IMPB/MUCB/SAMB family protein	- none -
fig|720555.3.peg.1364	CDS	Contig8	1354019	1354165	2	+	147	hypothetical protein	- none -
fig|720555.3.peg.1365	CDS	Contig8	1354250	1354720	2	+	471	UV-damage repair protein	- none -
fig|720555.3.peg.1366	CDS	Contig8	1354627	1354881	1	+	255	UV-damage repair protein	- none -
fig|720555.3.peg.1367	CDS	Contig8	1355805	1355074	-3	-	732	Endo-beta-1,3-1,4 glucanase (Licheninase) (EC 3.2.1.73)	Beta-Glucoside Metabolism
fig|720555.3.peg.1368	CDS	Contig8	1356991	1357125	1	+	135	hypothetical protein	- none -
fig|720555.3.peg.1369	CDS	Contig8	1358003	1358170	2	+	168	unknown	- none -
fig|720555.3.peg.1370	CDS	Contig8	1358176	1358532	1	+	357	Isoleucyl-tRNA synthetase (EC 6.1.1.5)	tRNA aminoacylation, Ile; <br>Cell Division Cluster
fig|720555.3.peg.1371	CDS	Contig8	1359616	1358597	-1	-	1020	hypothetical protein	- none -
fig|720555.3.peg.1372	CDS	Contig8	1360163	1360288	2	+	126	hypothetical protein	- none -
fig|720555.3.peg.1373	CDS	Contig8	1360620	1360501	-3	-	120	hypothetical protein	- none -
fig|720555.3.peg.1374	CDS	Contig8	1361924	1360968	-2	-	957	COG0657: Esterase/lipase	- none -
fig|720555.3.peg.1375	CDS	Contig8	1362884	1363594	2	+	711	5&#39;-nucleotidase YjjG (EC 3.1.3.5)	Housecleaning nucleoside triphosphate pyrophosphatases
fig|720555.3.peg.1376	CDS	Contig8	1363764	1363925	3	+	162	oxidoreductase, aldo/keto reductase family	- none -
fig|720555.3.peg.1377	CDS	Contig8	1365167	1365352	2	+	186	hypothetical protein	- none -
fig|720555.3.peg.1378	CDS	Contig8	1366284	1366171	-3	-	114	hypothetical protein	- none -
fig|720555.3.peg.1379	CDS	Contig8	1366711	1366571	-1	-	141	DinB family protein	- none -
fig|720555.3.peg.1380	CDS	Contig8	1368637	1367723	-1	-	915	Beta-lactamase class A	Beta-lactamase
fig|720555.3.peg.1381	CDS	Contig8	1370142	1371341	3	+	1200	hypothetical protein	- none -
fig|720555.3.peg.1382	CDS	Contig8	1371357	1371596	3	+	240	hypothetical protein	- none -
fig|720555.3.peg.1383	CDS	Contig8	1371694	1372629	1	+	936	hypothetical protein	- none -
fig|720555.3.peg.1384	CDS	Contig8	1373400	1374308	3	+	909	Vancomycin B-type resistance protein VanW	Resistance to Vancomycin
fig|720555.3.peg.1385	CDS	Contig8	1374864	1374751	-3	-	114	hypothetical protein	- none -
fig|720555.3.peg.1386	CDS	Contig8	1375073	1375597	2	+	525	hypothetical protein	- none -
fig|720555.3.peg.1387	CDS	Contig8	1375641	1376204	3	+	564	hypothetical protein	- none -
fig|720555.3.peg.1388	CDS	Contig8	1376672	1376800	2	+	129	hypothetical protein	- none -
fig|720555.3.peg.1389	CDS	Contig8	1376793	1376936	3	+	144	Lipoprotein signal peptidase (EC 3.4.23.36)	Signal peptidase; <br>Lipoprotein Biosynthesis
fig|720555.3.peg.1390	CDS	Contig8	1377507	1378331	3	+	825	chitosanase( EC:3.2.1.132 )	- none -
fig|720555.3.peg.1391	CDS	Contig8	1378904	1379020	2	+	117	hypothetical protein	- none -
fig|720555.3.peg.1392	CDS	Contig8	1379670	1380014	3	+	345	Ribosome recycling factor	- none -
fig|720555.3.peg.1393	CDS	Contig8	1380072	1381307	3	+	1236	hypothetical protein	- none -
fig|720555.3.peg.1394	CDS	Contig8	1381829	1382017	2	+	189	hypothetical protein	- none -
fig|720555.3.peg.1395	CDS	Contig8	1382602	1382144	-1	-	459	spermine/spermidine acetyltransferase( EC:2.3.1.- )	- none -
fig|720555.3.peg.1396	CDS	Contig8	1382783	1383610	2	+	828	Transcriptional regulator, MerR family	Cobalt-zinc-cadmium resistance
fig|720555.3.peg.1397	CDS	Contig8	1383919	1384344	1	+	426	hypothetical protein	- none -
fig|720555.3.peg.1398	CDS	Contig8	1385461	1384916	-1	-	546	hypothetical protein	- none -
fig|720555.3.peg.1399	CDS	Contig8	1386301	1385627	-1	-	675	hypothetical protein	- none -
fig|720555.3.peg.1400	CDS	Contig8	1386370	1386483	1	+	114	hypothetical protein	- none -
fig|720555.3.peg.1401	CDS	Contig8	1387348	1386602	-1	-	747	Beta-lactamase, type II( EC:3.5.2.6 )	- none -
fig|720555.3.peg.1402	CDS	Contig8	1387600	1387713	1	+	114	hypothetical protein	- none -
fig|720555.3.peg.1403	CDS	Contig8	1389114	1387999	-3	-	1116	response regulator aspartate phosphatase	- none -
fig|720555.3.peg.1404	CDS	Contig8	1389791	1390231	2	+	441	hypothetical protein	- none -
fig|720555.3.peg.1405	CDS	Contig8	1390286	1390711	2	+	426	Integral membrane protein TerC	- none -
fig|720555.3.peg.1406	CDS	Contig8	1390712	1391437	2	+	726	ABC transporter, ATP-binding protein	- none -
fig|720555.3.peg.1407	CDS	Contig8	1391437	1392162	1	+	726	ABC transporter, permease protein, putative	- none -
fig|720555.3.peg.1408	CDS	Contig8	1393032	1392676	-3	-	357	hypothetical protein	- none -
fig|720555.3.peg.1409	CDS	Contig8	1393442	1394200	2	+	759	putative aminoglycoside 6-adenylyltansferase	- none -
fig|720555.3.peg.1410	CDS	Contig8	1394423	1394220	-2	-	204	Spore coat protein C	- none -
fig|720555.3.peg.1411	CDS	Contig8	1395193	1395074	-1	-	120	hypothetical protein	- none -
fig|720555.3.peg.1412	CDS	Contig8	1395411	1395599	3	+	189	hypothetical protein	- none -
fig|720555.3.peg.1413	CDS	Contig8	1395648	1395836	3	+	189	hypothetical protein	- none -
fig|720555.3.peg.1414	CDS	Contig8	1395984	1395847	-3	-	138	hypothetical protein	- none -
fig|720555.3.peg.1415	CDS	Contig8	1396804	1397664	1	+	861	hypothetical protein	- none -
fig|720555.3.peg.1416	CDS	Contig8	1397742	1398188	3	+	447	YoaW	- none -
fig|720555.3.peg.1417	CDS	Contig8	1398151	1398285	1	+	135	hypothetical protein	- none -
fig|720555.3.peg.1418	CDS	Contig8	1398272	1398406	2	+	135	hypothetical protein	- none -
fig|720555.3.peg.1419	CDS	Contig8	1398594	1398481	-3	-	114	hypothetical protein	- none -
fig|720555.3.peg.1420	CDS	Contig8	1398620	1399339	2	+	720	hypothetical protein	- none -
fig|720555.3.peg.1421	CDS	Contig8	1399395	1400108	3	+	714	Cell division protein FtsX	Bacterial motility:Gliding; <br>CBSS-393121.3.peg.2760; <br>Bacterial Cell Division
fig|720555.3.peg.1422	CDS	Contig8	1400463	1401314	3	+	852	hypothetical protein	- none -
fig|720555.3.peg.1423	CDS	Contig8	1401425	1401934	2	+	510	hypothetical protein	- none -
fig|720555.3.peg.1424	CDS	Contig8	1401931	1403553	1	+	1623	membrane protein	- none -
fig|720555.3.peg.1425	CDS	Contig8	1403834	1404595	2	+	762	hypothetical protein	- none -
fig|720555.3.peg.1426	CDS	Contig8	1404761	1404940	2	+	180	hypothetical protein	- none -
fig|720555.3.peg.1427	CDS	Contig8	1404933	1405766	3	+	834	phage-like protein	- none -
fig|720555.3.peg.1428	CDS	Contig8	1406019	1405801	-3	-	219	unknown	- none -
fig|720555.3.peg.1429	CDS	Contig8	1406541	1406092	-3	-	450	hypothetical protein	- none -
fig|720555.3.peg.1430	CDS	Contig8	1406961	1406662	-3	-	300	Spore coat protein F	- none -
fig|720555.3.peg.1431	CDS	Contig8	1407155	1406958	-2	-	198	Spore coat protein F	- none -
fig|720555.3.peg.1432	CDS	Contig8	1408578	1407958	-3	-	621	SOS-response repressor and protease LexA (EC 3.4.21.88)	DNA repair, bacterial
fig|720555.3.peg.1433	CDS	Contig8	1408733	1409044	2	+	312	hypothetical protein	- none -
fig|720555.3.peg.1434	CDS	Contig8	1409064	1409714	3	+	651	site-specific recombinase, resolvase family	- none -
fig|720555.3.peg.1435	CDS	Contig8	1409785	1410018	1	+	234	unknown	- none -
fig|720555.3.peg.1436	CDS	Contig8	1410190	1412193	1	+	2004	Transketolase (EC 2.2.1.1)	Pentose phosphate pathway
fig|720555.3.peg.1437	CDS	Contig8	1412344	1412790	1	+	447	alternate gene name: yoxF	- none -
fig|720555.3.peg.1438	CDS	Contig8	1412876	1413094	2	+	219	alternate gene name: yoxG	- none -
fig|720555.3.peg.1439	CDS	Contig8	1413388	1413176	-1	-	213	unknown	- none -
fig|720555.3.peg.1440	CDS	Contig8	1413566	1414270	2	+	705	Cytochrome c-type biogenesis protein CcdA (DsbD analog)	Periplasmic disulfide interchange; <br>Biogenesis of c-type cytochromes; <br>Peptide methionine sulfoxide reductase; <br>CBSS-196164.1.peg.461
fig|720555.3.peg.1441	CDS	Contig8	1414362	1414724	3	+	363	Chemotaxis regulator - transmits chemoreceptor signals to flagelllar motor components CheY	Bacterial Chemotaxis
fig|720555.3.peg.1442	CDS	Contig8	1414814	1415296	2	+	483	hypothetical protein	- none -
fig|720555.3.peg.1443	CDS	Contig8	1415751	1415323	-3	-	429	hypothetical protein	- none -
fig|720555.3.peg.1444	CDS	Contig8	1416355	1415978	-1	-	378	Spore coat protein M	- none -
fig|720555.3.peg.1445	CDS	Contig8	1416602	1416456	-2	-	147	Small, acid-soluble spore protein P	- none -
fig|720555.3.peg.1446	CDS	Contig8	1416773	1416627	-2	-	147	Small, acid-soluble spore protein O	- none -
fig|720555.3.peg.1447	CDS	Contig8	1417005	1419728	3	+	2724	Aconitate hydratase (EC 4.2.1.3) @ 2-methylisocitrate dehydratase (EC 4.2.1.99)	Methylcitrate cycle; <br>Biogenesis of c-type cytochromes; <br>Propionate-CoA to Succinate Module; <br>Propionate-CoA to Succinate Module; <br>TCA Cycle
fig|720555.3.peg.1448	CDS	Contig8	1419756	1420313	3	+	558	Thiol:disulfide oxidoreductase related to ResA	Biogenesis of c-type cytochromes; <br>CBSS-196164.1.peg.461
fig|720555.3.peg.1449	CDS	Contig8	1420400	1420525	2	+	126	hypothetical protein	- none -
fig|720555.3.peg.1450	CDS	Contig8	1420590	1420736	3	+	147	Small, acid-soluble spore protein N	- none -
fig|720555.3.peg.1451	CDS	Contig8	1420769	1421008	2	+	240	Thioredoxin related protein	- none -
fig|720555.3.peg.1452	CDS	Contig8	1421092	1421508	1	+	417	4-hydroxybenzoyl-CoA thioesterase family active site	- none -
fig|720555.3.peg.1453	CDS	Contig8	1421520	1421822	3	+	303	hypothetical protein	- none -
fig|720555.3.peg.1454	CDS	Contig8	1422142	1421855	-1	-	288	hypothetical protein	- none -
fig|720555.3.peg.1455	CDS	Contig8	1422817	1422236	-1	-	582	Acyl-phosphate:glycerol-3-phosphate O-acyltransferase PlsY	Glycerolipid and Glycerophospholipid Metabolism in Bacteria
fig|720555.3.peg.1456	CDS	Contig8	1423000	1423407	1	+	408	Succinyl-CoA synthetase, alpha subunit-related enzymes	- none -
fig|720555.3.peg.1457	CDS	Contig8	1423835	1425805	2	+	1971	Topoisomerase IV subunit B (EC 5.99.1.-)	DNA topoisomerases, Type II, ATP-dependent; <br>Resistance to fluoroquinolones
fig|720555.3.peg.1458	CDS	Contig8	1425809	1428229	2	+	2421	Topoisomerase IV subunit A (EC 5.99.1.-)	DNA topoisomerases, Type II, ATP-dependent; <br>Resistance to fluoroquinolones
fig|720555.3.peg.1459	CDS	Contig8	1428406	1428281	-1	-	126	Putative secretion accessory protein EsaA/YueB	- none -
fig|720555.3.peg.1460	CDS	Contig8	1428784	1428431	-1	-	354	hypothetical protein	- none -
fig|720555.3.peg.1461	CDS	Contig8	1429350	1430768	3	+	1419	amino acid carrier protein	- none -
fig|720555.3.peg.1462	CDS	Contig8	1431304	1431161	-1	-	144	hypothetical protein	- none -
fig|720555.3.peg.1463	CDS	Contig8	1432570	1431425	-1	-	1146	hypothetical protein	- none -
fig|720555.3.peg.1464	CDS	Contig8	1432776	1432567	-3	-	210	Two-component response regulator	- none -
fig|720555.3.peg.1465	CDS	Contig8	1434221	1432950	-2	-	1272	Glycoprotein gp2	Galactosylceramide and Sulfatide metabolism
fig|720555.3.peg.1466	CDS	Contig8	1436028	1434490	-3	-	1539	endo-1,4-beta-xylanase (xylanase D)	- none -
fig|720555.3.peg.1467	CDS	Contig8	1436598	1436479	-3	-	120	D-beta-hydroxybutyrate dehydrogenase (EC 1.1.1.30)	Polyhydroxybutyrate metabolism
fig|720555.3.peg.1468	CDS	Contig8	1436851	1437216	1	+	366	hypothetical protein	- none -
fig|720555.3.peg.1469	CDS	Contig8	1437223	1437669	1	+	447	UTP--glucose-1-phosphate uridylyltransferase (EC 2.7.7.9)	Streptococcal Hyaluronic Acid Capsule
fig|720555.3.peg.1470	CDS	Contig8	1437620	1437763	2	+	144	UTP--glucose-1-phosphate uridylyltransferase (EC 2.7.7.9)	Streptococcal Hyaluronic Acid Capsule
fig|720555.3.peg.1471	CDS	Contig8	1437922	1438014	1	+	93	hypothetical protein	- none -
fig|720555.3.peg.1472	CDS	Contig8	1438077	1438673	3	+	597	DedA family protein	- none -
fig|720555.3.peg.1473	CDS	Contig8	1439918	1438719	-2	-	1200	3&#39;-to-5&#39; oligoribonuclease B, Bacillus type	- none -
fig|720555.3.peg.1474	CDS	Contig8	1441762	1440233	-1	-	1530	Methylcrotonyl-CoA carboxylase carboxyl transferase subunit (EC 6.4.1.4)	HMG CoA Synthesis; <br>Leucine Degradation and HMG-CoA Metabolism
fig|720555.3.peg.1475	CDS	Contig8	1442564	1441782	-2	-	783	Methylglutaconyl-CoA hydratase (EC 4.2.1.18)	HMG CoA Synthesis; <br>Leucine Degradation and HMG-CoA Metabolism
fig|720555.3.peg.1476	CDS	Contig8	1443489	1442581	-3	-	909	Hydroxymethylglutaryl-CoA lyase (EC 4.1.3.4)	HMG CoA Synthesis; <br>Leucine Degradation and HMG-CoA Metabolism
fig|720555.3.peg.1477	CDS	Contig8	1443725	1443510	-2	-	216	Biotin carboxyl carrier protein of methylcrotonyl-CoA carboxylase	HMG CoA Synthesis; <br>Leucine Degradation and HMG-CoA Metabolism
fig|720555.3.peg.1478	CDS	Contig8	1445079	1443748	-3	-	1332	Biotin carboxylase of methylcrotonyl-CoA carboxylase (EC 6.3.4.14)	HMG CoA Synthesis; <br>Leucine Degradation and HMG-CoA Metabolism
fig|720555.3.peg.1479	CDS	Contig8	1446737	1445091	-2	-	1647	Long-chain-fatty-acid--CoA ligase (EC 6.2.1.3) / Acetoacetyl-CoA synthetase [leucine] (EC 6.2.1.16)	HMG CoA Synthesis; <br>Biotin biosynthesis; <br>Leucine Degradation and HMG-CoA Metabolism
fig|720555.3.peg.1480	CDS	Contig8	1447918	1446776	-1	-	1143	Isovaleryl-CoA dehydrogenase (EC 1.3.99.10)	HMG CoA Synthesis; <br>Leucine Degradation and HMG-CoA Metabolism
fig|720555.3.peg.1481	CDS	Contig8	1449624	1448071	-3	-	1554	COG1649 predicted glycoside hydrolase	- none -
fig|720555.3.peg.1482	CDS	Contig8	1450155	1449772	-3	-	384	hypothetical protein	- none -
fig|720555.3.peg.1483	CDS	Contig8	1454114	1450287	-2	-	3828	plipastatin synthetase	- none -
fig|720555.3.peg.1484	CDS	Contig8	1464969	1454143	-3	-	10827	Peptide synthetase	- none -
fig|720555.3.peg.1485	CDS	Contig8	1472653	1464995	-1	-	7659	hypothetical protein	- none -
fig|720555.3.peg.1486	CDS	Contig8	1480405	1472672	-1	-	7734	hypothetical protein	- none -
fig|720555.3.peg.1487	CDS	Contig8	1488111	1480429	-3	-	7683	hypothetical protein	- none -
fig|720555.3.peg.1488	CDS	Contig8	1489571	1488369	-2	-	1203	Flavohemoprotein (Hemoglobin-like protein) (Flavohemoglobin) (Nitric oxide dioxygenase) (EC 1.14.12.17)	Glutaredoxins; <br>Flavohaemoglobin; <br>Bacterial hemoglobins
fig|720555.3.peg.1489	CDS	Contig8	1491290	1489803	-2	-	1488	D-alanyl-D-alanine carboxypeptidase (EC 3.4.16.4)	Peptidoglycan Biosynthesis; <br>Murein Hydrolases
fig|720555.3.peg.1490	CDS	Contig8	1492323	1491352	-3	-	972	Type I restriction-modification system, restriction subunit R (EC 3.1.21.3)	- none -
fig|720555.3.peg.1491	CDS	Contig8	1492594	1493139	1	+	546	Isoleucyl-tRNA synthetase (EC 6.1.1.5)	tRNA aminoacylation, Ile; <br>Cell Division Cluster
fig|720555.3.peg.1492	CDS	Contig8	1493266	1493721	1	+	456	Transcriptional regulator, AraC family	- none -
fig|720555.3.peg.1493	CDS	Contig8	1493992	1493681	-1	-	312	hypothetical protein	- none -
fig|720555.3.peg.1494	CDS	Contig8	1494515	1494363	-2	-	153	hypothetical protein	- none -
fig|720555.3.peg.1495	CDS	Contig8	1495638	1494505	-3	-	1134	response regulator aspartate phosphatase	- none -
fig|720555.3.peg.1496	CDS	Contig8	1497312	1496488	-3	-	825	N-acetylmuramoyl-L-alanine amidase( EC:3.5.1.28 )	- none -
fig|720555.3.peg.1497	CDS	Contig8	1497445	1497323	-1	-	123	hypothetical protein	- none -
fig|720555.3.peg.1499	CDS	Contig8	1498503	1497958	-3	-	546	site-specific recombinase (phage integrase family)	- none -
fig|720555.3.peg.1500	CDS	Contig8	1499102	1498872	-2	-	231	DNA binding domain, excisionase family	- none -
fig|720555.3.peg.1501	CDS	Contig8	1499428	1501194	1	+	1767	Gamma-glutamyltranspeptidase (EC 2.3.2.2)	Poly-gamma-glutamate biosynthesis
fig|720555.3.peg.1502	CDS	Contig8	1502182	1501313	-1	-	870	transcriptional regulator, LysR family	- none -
fig|720555.3.peg.1503	CDS	Contig8	1502311	1503300	1	+	990	Alcohol dehydrogenase (EC 1.1.1.1)	Glycerolipid and Glycerophospholipid Metabolism in Bacteria; <br>Fermentations: Lactate
fig|720555.3.peg.1504	CDS	Contig8	1505489	1504008	-2	-	1482	Glutamate synthase [NADPH] small chain (EC 1.4.1.13)	Ammonia assimilation; <br>Glutamine, Glutamate, Aspartate and Asparagine Biosynthesis
fig|720555.3.peg.1505	CDS	Contig8	1510071	1505506	-3	-	4566	Glutamate synthase [NADPH] large chain (EC 1.4.1.13)	Ammonia assimilation; <br>Glutamine, Glutamate, Aspartate and Asparagine Biosynthesis
fig|720555.3.peg.1506	CDS	Contig8	1510219	1511121	1	+	903	GltC, transcription activator of glutamate synthase operon	DNA-binding regulatory proteins, strays
fig|720555.3.peg.1507	CDS	Contig8	1512313	1511189	-1	-	1125	Glutamate 5-kinase (EC 2.7.2.11)	Proline, 4-hydroxyproline uptake and utilization; <br>Proline Synthesis
fig|720555.3.peg.1508	CDS	Contig8	1513137	1512337	-3	-	801	Pyrroline-5-carboxylate reductase (EC 1.5.1.2)	Proline, 4-hydroxyproline uptake and utilization; <br>Proline Synthesis; <br>A Hypothetical Protein Related to Proline Metabolism
fig|720555.3.peg.1509	CDS	Contig8	1513722	1513354	-3	-	369	Replication termination protein	- none -
fig|720555.3.peg.1510	CDS	Contig8	1514069	1513929	-2	-	141	hypothetical protein	- none -
fig|720555.3.peg.1511	CDS	Contig8	1514283	1514101	-3	-	183	Mn2+/Fe2+ transporter, NRAMP family	- none -
fig|720555.3.peg.1512	CDS	Contig8	1522370	1514757	-2	-	7614	Peptide synthetase	- none -
fig|720555.3.peg.1513	CDS	Contig8	1538736	1522645	-3	-	16092	Non-ribosomal peptide synthetase modules, pyoverdine	- none -
fig|720555.3.peg.1514	CDS	Contig8	1550724	1538782	-3	-	11943	Peptide synthetase	- none -
fig|720555.3.peg.1515	CDS	Contig8	1551947	1550745	-2	-	1203	Malonyl CoA-acyl carrier protein transacylase (EC 2.3.1.39)	Fatty Acid Biosynthesis FASII
fig|720555.3.peg.1516	CDS	Contig8	1552431	1552571	3	+	141	hypothetical protein	- none -
fig|720555.3.peg.1517	CDS	Contig8	1552819	1552652	-1	-	168	hypothetical protein	- none -
fig|720555.3.peg.1518	CDS	Contig8	1554759	1554208	-3	-	552	unknown	- none -
fig|720555.3.peg.1519	CDS	Contig8	1555393	1555142	-1	-	252	hypothetical protein	- none -
fig|720555.3.peg.1520	CDS	Contig8	1556071	1555868	-1	-	204	hypothetical protein	- none -
fig|720555.3.peg.1521	CDS	Contig8	1557157	1556219	-1	-	939	Threonine synthase (EC 4.2.3.1)	Threonine and Homoserine Biosynthesis
fig|720555.3.peg.1522	CDS	Contig8	1557770	1557396	-2	-	375	putative Endoribonuclease L-PSP	- none -
fig|720555.3.peg.1523	CDS	Contig8	1558431	1557781	-3	-	651	hypothetical DNA binding protein	- none -
fig|720555.3.peg.1524	CDS	Contig8	1558690	1558845	1	+	156	hypothetical protein	- none -
fig|720555.3.peg.1525	CDS	Contig8	1559468	1558893	-2	-	576	Thymidylate synthase (EC 2.1.1.45)	Folate Biosynthesis; <br>pyrimidine conversions
fig|720555.3.peg.1526	CDS	Contig8	1560284	1560412	2	+	129	hypothetical protein	- none -
fig|720555.3.peg.1527	CDS	Contig8	1561174	1560872	-1	-	303	unknown	- none -
fig|720555.3.peg.1528	CDS	Contig8	1561333	1561533	1	+	201	Spore coat protein C	- none -
fig|720555.3.peg.1529	CDS	Contig8	1562896	1562462	-1	-	435	Deoxyuridine 5&#39;-triphosphate nucleotidohydrolase (EC 3.6.1.23)	Housecleaning nucleoside triphosphate pyrophosphatases; <br>Nudix proteins (nucleoside triphosphate hydrolases)
fig|720555.3.peg.1530	CDS	Contig8	1563995	1563378	-2	-	618	Ribonucleotide reductase of class Ib (aerobic), beta subunit (EC 1.17.4.1)	Ribonucleotide reduction
fig|720555.3.peg.1531	CDS	Contig8	1564202	1563996	-2	-	207	Ribonucleotide reductase of class Ib (aerobic), beta subunit (EC 1.17.4.1)	Ribonucleotide reduction
fig|720555.3.peg.1532	CDS	Contig8	1565177	1564974	-2	-	204	Ribonucleotide reductase of class Ib (aerobic), alpha subunit (EC 1.17.4.1)	Glutathione: Redox cycle; <br>Ribonucleotide reduction
fig|720555.3.peg.1533	CDS	Contig8	1565830	1565165	-1	-	666	Ribonucleotide reductase of class Ib (aerobic), alpha subunit (EC 1.17.4.1) @ intein-containing	Glutathione: Redox cycle; <br>Inteins; <br>Ribonucleotide reduction
fig|720555.3.peg.1534	CDS	Contig8	1565943	1565854	-3	-	90	hypothetical protein	- none -
fig|720555.3.peg.1535	CDS	Contig8	1566158	1565940	-2	-	219	Ribonucleotide reductase of class Ib (aerobic), alpha subunit (EC 1.17.4.1) @ intein-containing	Glutathione: Redox cycle; <br>Inteins; <br>Ribonucleotide reduction
fig|720555.3.peg.1536	CDS	Contig8	1566273	1566109	-3	-	165	Ribonucleotide reductase of class Ib (aerobic), alpha subunit (EC 1.17.4.1)	- none -
fig|720555.3.peg.1537	CDS	Contig8	1566449	1566303	-2	-	147	Ribonucleotide reductase of class Ib (aerobic), alpha subunit (EC 1.17.4.1)	Glutathione: Redox cycle; <br>Ribonucleotide reduction
fig|720555.3.peg.1538	CDS	Contig8	1569953	1567884	-2	-	2070	TnpA transposase	- none -
fig|720555.3.peg.1539	CDS	Contig8	1570647	1570138	-3	-	510	TnpA transposase	- none -
fig|720555.3.peg.1540	CDS	Contig8	1570852	1571427	1	+	576	Resolvase	- none -
fig|720555.3.peg.1541	CDS	Contig8	1571491	1572453	1	+	963	Transcriptional regulator, DeoR family	- none -
fig|720555.3.peg.1542	CDS	Contig8	1572528	1573160	3	+	633	thiJ/pfpI family protein	- none -
fig|720555.3.peg.1543	CDS	Contig8	1573809	1573654	-3	-	156	hypothetical protein	- none -
fig|720555.3.peg.1544	CDS	Contig8	1574168	1574022	-2	-	147	hypothetical protein	- none -
fig|720555.3.peg.1545	CDS	Contig8	1574438	1574217	-2	-	222	hypothetical protein	- none -
fig|720555.3.peg.1546	CDS	Contig8	1574662	1574546	-1	-	117	hypothetical protein	- none -
fig|720555.3.peg.1547	CDS	Contig8	1575085	1574771	-1	-	315	Unnamed hypothetical gene product in the file!!	- none -
fig|720555.3.peg.1548	CDS	Contig8	1575539	1575156	-2	-	384	unknown	- none -
fig|720555.3.peg.1549	CDS	Contig8	1575612	1575845	3	+	234	hypothetical protein	- none -
fig|720555.3.peg.1550	CDS	Contig8	1576069	1575884	-1	-	186	hypothetical protein	- none -
fig|720555.3.peg.1551	CDS	Contig8	1576980	1576663	-3	-	318	hypothetical protein	- none -
fig|720555.3.peg.1552	CDS	Contig8	1578390	1577317	-3	-	1074	hypothetical protein	- none -
fig|720555.3.peg.1553	CDS	Contig8	1578691	1578452	-1	-	240	unknown	- none -
fig|720555.3.peg.1554	CDS	Contig8	1580026	1579016	-1	-	1011	2-dehydropantoate 2-reductase (EC 1.1.1.169)	Coenzyme A Biosynthesis
fig|720555.3.peg.1555	CDS	Contig8	1580671	1580252	-1	-	420	Nucleotidyltransferase	- none -
fig|720555.3.peg.1556	CDS	Contig8	1581465	1581223	-3	-	243	hypothetical protein	- none -
fig|720555.3.peg.1557	CDS	Contig8	1582403	1582113	-2	-	291	hypothetical protein	- none -
fig|720555.3.peg.1558	CDS	Contig8	1582975	1583349	1	+	375	unknown	- none -
fig|720555.3.peg.1559	CDS	Contig8	1583578	1583363	-1	-	216	unknown	- none -
fig|720555.3.peg.1560	CDS	Contig8	1583868	1583755	-3	-	114	hypothetical protein	- none -
fig|720555.3.peg.1561	CDS	Contig8	1584157	1583981	-1	-	177	hypothetical protein	- none -
fig|720555.3.peg.1562	CDS	Contig8	1584404	1584210	-2	-	195	NADH dehydrogenase, subunit 5	- none -
fig|720555.3.peg.1563	CDS	Contig8	1584909	1584775	-3	-	135	unknown	- none -
fig|720555.3.peg.1564	CDS	Contig8	1585366	1584995	-1	-	372	hypothetical protein	- none -
fig|720555.3.peg.1565	CDS	Contig8	1585692	1585414	-3	-	279	hypothetical protein	- none -
fig|720555.3.peg.1566	CDS	Contig8	1585897	1585760	-1	-	138	hypothetical protein	- none -
fig|720555.3.peg.1567	CDS	Contig8	1586339	1585935	-2	-	405	unknown	- none -
fig|720555.3.peg.1568	CDS	Contig8	1586893	1586339	-1	-	555	Dimeric dUTPase (EC 3.6.1.23)	Housecleaning nucleoside triphosphate pyrophosphatases
fig|720555.3.peg.1569	CDS	Contig8	1587650	1587477	-2	-	174	unknown	- none -
fig|720555.3.peg.1570	CDS	Contig8	1587970	1587773	-1	-	198	unknown	- none -
fig|720555.3.peg.1571	CDS	Contig8	1588248	1588033	-3	-	216	unknown	- none -
fig|720555.3.peg.1572	CDS	Contig8	1588433	1588657	2	+	225	UDP-glucose 4-epimerase (EC 5.1.3.2)	N-linked Glycosylation in Bacteria; <br>Lactose and Galactose Uptake and Utilization; <br>Rhamnose containing glycans
fig|720555.3.peg.1573	CDS	Contig8	1589854	1588877	-1	-	978	unknown	- none -
fig|720555.3.peg.1574	CDS	Contig8	1591266	1589875	-3	-	1392	unknown	- none -
fig|720555.3.peg.1575	CDS	Contig8	1592435	1591422	-2	-	1014	unknown	- none -
fig|720555.3.peg.1576	CDS	Contig8	1592646	1592440	-3	-	207	unknown	- none -
fig|720555.3.peg.1577	CDS	Contig8	1593037	1592699	-1	-	339	unknown	- none -
fig|720555.3.peg.1578	CDS	Contig8	1593243	1593043	-3	-	201	unknown	- none -
fig|720555.3.peg.1579	CDS	Contig8	1593718	1593590	-1	-	129	Cytochrome c4	Soluble cytochromes and functionally related electron carriers
fig|720555.3.peg.1580	CDS	Contig8	1593957	1593745	-3	-	213	unknown	- none -
fig|720555.3.peg.1581	CDS	Contig8	1594909	1594016	-1	-	894	unknown	- none -
fig|720555.3.peg.1582	CDS	Contig8	1595990	1595256	-2	-	735	hypothetical protein	- none -
fig|720555.3.peg.1583	CDS	Contig8	1597191	1596079	-3	-	1113	hypothetical protein	- none -
fig|720555.3.peg.1584	CDS	Contig8	1597734	1597339	-3	-	396	hypothetical protein	- none -
fig|720555.3.peg.1585	CDS	Contig8	1598082	1597948	-3	-	135	hypothetical protein	- none -
fig|720555.3.peg.1586	CDS	Contig8	1599339	1599088	-3	-	252	unknown	- none -
fig|720555.3.peg.1587	CDS	Contig8	1600420	1599392	-1	-	1029	hypothetical protein	- none -
fig|720555.3.peg.1588	CDS	Contig8	1600944	1600795	-3	-	150	hypothetical protein	- none -
fig|720555.3.peg.1589	CDS	Contig8	1601859	1601407	-3	-	453	hypothetical protein	- none -
fig|720555.3.peg.1590	CDS	Contig8	1602719	1601967	-2	-	753	hypothetical protein	- none -
fig|720555.3.peg.1591	CDS	Contig8	1603383	1603156	-3	-	228	unknown	- none -
fig|720555.3.peg.1592	CDS	Contig8	1605756	1605529	-3	-	228	hypothetical protein	- none -
fig|720555.3.peg.1593	CDS	Contig8	1606633	1606127	-1	-	507	unknown	- none -
fig|720555.3.peg.1594	CDS	Contig8	1608177	1606960	-3	-	1218	unknown	- none -
fig|720555.3.peg.1595	CDS	Contig8	1608578	1608465	-2	-	114	hypothetical protein	- none -
fig|720555.3.peg.1596	CDS	Contig8	1610213	1609608	-2	-	606	2-oxoglutarate oxidoreductase, alpha subunit (EC 1.2.7.3)	TCA Cycle
fig|720555.3.peg.1597	CDS	Contig8	1610706	1610437	-3	-	270	putative SPbeta phage repressor	- none -
fig|720555.3.peg.1598	CDS	Contig8	1611923	1611636	-2	-	288	YoaO	- none -
fig|720555.3.peg.1599	CDS	Contig8	1612376	1612194	-2	-	183	hypothetical protein	- none -
fig|720555.3.peg.1600	CDS	Contig8	1612482	1612661	3	+	180	unknown	- none -
fig|720555.3.peg.1601	CDS	Contig8	1612714	1614009	1	+	1296	Polyphosphate kinase (EC 2.7.4.1)	High affinity phosphate transporter and control of PHO regulon; <br>Purine conversions; <br>Phosphate metabolism
fig|720555.3.peg.1602	CDS	Contig8	1614006	1615241	3	+	1236	unknown	- none -
fig|720555.3.peg.1603	CDS	Contig8	1615505	1615780	2	+	276	DNA-binding protein HBsu	DNA structural proteins, bacterial
fig|720555.3.peg.1604	CDS	Contig8	1616016	1616165	3	+	150	hypothetical protein	- none -
fig|720555.3.peg.1605	CDS	Contig8	1616633	1616520	-2	-	114	hypothetical protein	- none -
fig|720555.3.peg.1606	CDS	Contig8	1618130	1616883	-2	-	1248	hypothetical protein	- none -
fig|720555.3.peg.1607	CDS	Contig8	1618693	1618902	1	+	210	hypothetical protein	- none -
fig|720555.3.peg.1608	CDS	Contig8	1618914	1620110	3	+	1197	hypothetical protein	- none -
fig|720555.3.peg.1609	CDS	Contig8	1620262	1620591	1	+	330	hypothetical protein	- none -
fig|720555.3.peg.1610	CDS	Contig8	1620700	1621755	1	+	1056	unknown	- none -
fig|720555.3.peg.1611	CDS	Contig8	1621748	1623439	2	+	1692	hypothetical protein	- none -
fig|720555.3.peg.1612	CDS	Contig8	1623916	1624062	1	+	147	hypothetical protein	- none -
fig|720555.3.peg.1613	CDS	Contig8	1624254	1624496	3	+	243	ATP-dependent helicase	- none -
fig|720555.3.peg.1614	CDS	Contig8	1624886	1625134	2	+	249	hypothetical protein	- none -
fig|720555.3.peg.1615	CDS	Contig8	1625158	1625346	1	+	189	hypothetical protein	- none -
fig|720555.3.peg.1616	CDS	Contig8	1625700	1626692	3	+	993	hypothetical protein	- none -
fig|720555.3.peg.1617	CDS	Contig8	1626745	1627278	1	+	534	hypothetical protein	- none -
fig|720555.3.peg.1618	CDS	Contig8	1627440	1627721	3	+	282	hypothetical protein	- none -
fig|720555.3.peg.1619	CDS	Contig8	1627910	1628038	2	+	129	hypothetical protein	- none -
fig|720555.3.peg.1620	CDS	Contig8	1628035	1628706	1	+	672	unknown	- none -
fig|720555.3.peg.1621	CDS	Contig8	1628976	1629203	3	+	228	unknown	- none -
fig|720555.3.peg.1622	CDS	Contig8	1629200	1629925	2	+	726	unknown	- none -
fig|720555.3.peg.1623	CDS	Contig8	1629964	1630122	1	+	159	hypothetical protein	- none -
fig|720555.3.peg.1624	CDS	Contig8	1630179	1630754	3	+	576	Valyl-tRNA synthetase (EC 6.1.1.9)	tRNA aminoacylation, Val
fig|720555.3.peg.1625	CDS	Contig8	1630775	1631242	2	+	468	hypothetical protein	- none -
fig|720555.3.peg.1626	CDS	Contig8	1631316	1631675	3	+	360	Serine/threonine protein kinase (EC 2.7.11.1)	- none -
fig|720555.3.peg.1627	CDS	Contig8	1631675	1632433	2	+	759	hypothetical protein	- none -
fig|720555.3.peg.1628	CDS	Contig8	1632518	1633003	2	+	486	Putative long tail fibre [Bacteriophage A118]	- none -
fig|720555.3.peg.1629	CDS	Contig8	1633094	1633300	2	+	207	hypothetical protein	- none -
fig|720555.3.peg.1630	CDS	Contig8	1633316	1633522	2	+	207	hypothetical phage like protein	- none -
fig|720555.3.peg.1631	CDS	Contig8	1633598	1633732	2	+	135	hypothetical protein	- none -
fig|720555.3.peg.1632	CDS	Contig8	1633847	1634683	2	+	837	Glycerophosphoryl diester phosphodiesterase (EC 3.1.4.46)	Glycerol and Glycerol-3-phosphate Uptake and Utilization
fig|720555.3.peg.1633	CDS	Contig8	1634891	1635007	2	+	117	hypothetical protein	- none -
fig|720555.3.peg.1634	CDS	Contig8	1635040	1635279	1	+	240	hypothetical protein	- none -
fig|720555.3.peg.1635	CDS	Contig8	1635279	1635698	3	+	420	Thymidylate kinase (EC 2.7.4.9)	CBSS-393133.3.peg.2787; <br>pyrimidine conversions
fig|720555.3.peg.1636	CDS	Contig8	1635712	1635888	1	+	177	unknown	- none -
fig|720555.3.peg.1637	CDS	Contig8	1635988	1636713	1	+	726	unknown	- none -
fig|720555.3.peg.1638	CDS	Contig8	1637020	1636835	-1	-	186	hypothetical protein	- none -
fig|720555.3.peg.1639	CDS	Contig8	1637770	1638072	1	+	303	immunity protein d	- none -
fig|720555.3.peg.1640	CDS	Contig8	1638598	1640940	1	+	2343	Phage tail tape measure protein TP901, core region	- none -
fig|720555.3.peg.1641	CDS	Contig8	1640973	1641359	3	+	387	putative transglycosylase	- none -
fig|720555.3.peg.1642	CDS	Contig8	1641638	1641483	-2	-	156	hypothetical protein	- none -
fig|720555.3.peg.1643	CDS	Contig8	1642181	1641837	-2	-	345	IMPB/MUCB/SAMB family protein	- none -
fig|720555.3.peg.1644	CDS	Contig8	1642460	1642287	-2	-	174	unknown	- none -
fig|720555.3.peg.1645	CDS	Contig8	1642725	1642856	3	+	132	hypothetical protein	- none -
fig|720555.3.peg.1646	CDS	Contig8	1642929	1643270	3	+	342	hypothetical protein	- none -
fig|720555.3.peg.1647	CDS	Contig8	1643529	1643428	-3	-	102	hypothetical protein	- none -
fig|720555.3.peg.1648	CDS	Contig8	1644358	1643606	-1	-	753	Putative toxin component near putative ESAT-related proteins, repetitive / Repetitive hypothetical protein near ESAT cluster, SA0282 homolog	- none -
fig|720555.3.peg.1649	CDS	Contig8	1644607	1644476	-1	-	132	hypothetical protein	- none -
fig|720555.3.peg.1650	CDS	Contig8	1644921	1644778	-3	-	144	hypothetical protein	- none -
fig|720555.3.peg.1651	CDS	Contig8	1646436	1645621	-3	-	816	hypothetical protein	- none -
fig|720555.3.peg.1652	CDS	Contig8	1646435	1646617	2	+	183	hypothetical protein	- none -
fig|720555.3.peg.1653	CDS	Contig8	1646652	1647323	3	+	672	response regulator aspartate phosphatase	- none -
fig|720555.3.peg.1654	CDS	Contig8	1647497	1647652	2	+	156	hypothetical protein	- none -
fig|720555.3.peg.1655	CDS	Contig8	1648362	1647829	-3	-	534	Uncharacterized protein ynaB	- none -
fig|720555.3.peg.1656	CDS	Contig8	1648544	1648714	2	+	171	hypothetical protein	- none -
fig|720555.3.peg.1657	CDS	Contig8	1649520	1648888	-3	-	633	thiJ/pfpI family protein	- none -
fig|720555.3.peg.1658	CDS	Contig8	1649914	1649780	-1	-	135	hypothetical protein	- none -
fig|720555.3.peg.1659	CDS	Contig8	1650360	1650214	-3	-	147	hypothetical protein	- none -
fig|720555.3.peg.1660	CDS	Contig8	1651375	1650548	-1	-	828	3-oxoacyl-[acyl-carrier protein] reductase (EC 1.1.1.100)	Fatty Acid Biosynthesis FASII
fig|720555.3.peg.1661	CDS	Contig8	1651422	1651727	3	+	306	hypothetical protein	- none -
fig|720555.3.peg.1662	CDS	Contig8	1651980	1652486	3	+	507	DNA polymerase, DinB family	- none -
fig|720555.3.peg.1663	CDS	Contig8	1654028	1652790	-2	-	1239	alpha-ketoglutarate permease	- none -
fig|720555.3.peg.1664	CDS	Contig8	1655610	1654132	-3	-	1479	hypothetical protein	- none -
fig|720555.3.peg.1665	CDS	Contig8	1656628	1655627	-1	-	1002	D-3-phosphoglycerate dehydrogenase (EC 1.1.1.95)	Glycine and Serine Utilization; <br>Pyridoxin (Vitamin B6) Biosynthesis; <br>Serine Biosynthesis
fig|720555.3.peg.1666	CDS	Contig8	1656707	1656835	2	+	129	hypothetical protein	- none -
fig|720555.3.peg.1667	CDS	Contig8	1656991	1659048	1	+	2058	Anaerobic dehydrogenases, typically selenocysteine-containing	Anaerobic respiratory reductases
fig|720555.3.peg.1668	CDS	Contig8	1659741	1659538	-3	-	204	hypothetical protein	- none -
fig|720555.3.peg.1669	CDS	Contig8	1660302	1661051	3	+	750	Beta-ketoadipate enol-lactone hydrolase (EC 3.1.1.24)	- none -
fig|720555.3.peg.1670	CDS	Contig8	1661060	1661656	2	+	597	Transcriptional regulator, TetR family	- none -
fig|720555.3.peg.1671	CDS	Contig8	1662533	1662201	-2	-	333	Protein secretion chaperonin CsaA	ZZ gjo need homes
fig|720555.3.peg.1672	CDS	Contig8	1663318	1662596	-1	-	723	hypothetical protein	- none -
fig|720555.3.peg.1673	CDS	Contig8	1663626	1663459	-3	-	168	hypothetical protein	- none -
fig|720555.3.peg.1674	CDS	Contig8	1664307	1663747	-3	-	561	Transcriptional regulator, TetR family	- none -
fig|720555.3.peg.1675	CDS	Contig8	1665027	1664311	-3	-	717	metallo-beta-lactamase family protein	- none -
fig|720555.3.peg.1676	CDS	Contig8	1665585	1665100	-3	-	486	unknown	- none -
fig|720555.3.peg.1677	CDS	Contig8	1666586	1665648	-2	-	939	Transcriptional regulator, DeoR family	- none -
fig|720555.3.peg.1678	CDS	Contig8	1666758	1667288	3	+	531	Protein csk22	- none -
fig|720555.3.peg.1679	CDS	Contig8	1667666	1667334	-2	-	333	Transcriptional regulator, ArsR family	cAMP signaling in bacteria
fig|720555.3.peg.1680	CDS	Contig8	1667901	1668521	3	+	621	Pneumococcal vaccine antigen A homolog	- none -
fig|720555.3.peg.1681	CDS	Contig8	1669124	1668588	-2	-	537	hypothetical protein	- none -
fig|720555.3.peg.1682	CDS	Contig8	1670048	1669260	-2	-	789	hypothetical protein	- none -
fig|720555.3.peg.1683	CDS	Contig8	1670260	1670760	1	+	501	unknown	- none -
fig|720555.3.peg.1684	CDS	Contig8	1671107	1672165	2	+	1059	Fatty-acid desaturase (EC 1.14.99.-)	- none -
fig|720555.3.peg.1685	CDS	Contig8	1672292	1673428	2	+	1137	sensor histidine kinase	- none -
fig|720555.3.peg.1686	CDS	Contig8	1673425	1674024	1	+	600	putative two-component system response regulator	- none -
fig|720555.3.peg.1687	CDS	Contig8	1674210	1674088	-3	-	123	hypothetical protein	- none -
fig|720555.3.peg.1688	CDS	Contig8	1674541	1674374	-1	-	168	hypothetical protein	- none -
fig|720555.3.peg.1689	CDS	Contig8	1675964	1674885	-2	-	1080	Sodium/myo-inositol cotransporter	Inositol catabolism
fig|720555.3.peg.1690	CDS	Contig8	1677077	1676145	-2	-	933	Cell wall-binding protein	- none -
fig|720555.3.peg.1691	CDS	Contig8	1677338	1677186	-2	-	153	hypothetical protein	- none -
fig|720555.3.peg.1692	CDS	Contig8	1679103	1677325	-3	-	1779	ATP-dependent DNA helicase RecQ	DNA repair, bacterial RecFOR pathway
fig|720555.3.peg.1693	CDS	Contig8	1680253	1679627	-1	-	627	FMN-dependent NADH-azoreductase	- none -
fig|720555.3.peg.1694	CDS	Contig8	1680899	1680408	-2	-	492	C4-type zinc finger protein, DksA/TraR family	Zinc regulated enzymes; <br>CBSS-235.1.peg.567
fig|720555.3.peg.1695	CDS	Contig8	1681390	1681046	-1	-	345	unknown	- none -
fig|720555.3.peg.1696	CDS	Contig8	1681873	1681724	-1	-	150	hypothetical protein	- none -
fig|720555.3.peg.1697	CDS	Contig8	1682146	1681943	-1	-	204	hypothetical protein	- none -
fig|720555.3.peg.1698	CDS	Contig8	1682378	1683865	2	+	1488	Aldehyde dehydrogenase (EC 1.2.1.3)	Pyruvate metabolism II: acetyl-CoA, acetogenesis from pyruvate; <br>Glycerolipid and Glycerophospholipid Metabolism in Bacteria; <br>Methylglyoxal Metabolism; <br>Entner-Doudoroff Pathway
fig|720555.3.peg.1699	CDS	Contig8	1683982	1683854	-1	-	129	hypothetical protein	- none -
fig|720555.3.peg.1700	CDS	Contig8	1683975	1685864	3	+	1890	Squalene--hopene cyclase (EC 5.4.99.-)	- none -
fig|720555.3.peg.1701	CDS	Contig8	1685861	1686706	2	+	846	Superoxide dismutase [Fe] (EC 1.15.1.1)	Oxidative stress; <br>Protection from Reactive Oxygen Species
fig|720555.3.peg.1702	CDS	Contig8	1688078	1686741	-2	-	1338	sodium-dependent transporter	- none -
fig|720555.3.peg.1703	CDS	Contig8	1688339	1689304	2	+	966	Sodium-dependent transporter	- none -
fig|720555.3.peg.1704	CDS	Contig8	1690600	1689347	-1	-	1254	Dihydrolipoamide succinyltransferase component (E2) of 2-oxoglutarate dehydrogenase complex (EC 2.3.1.61)	Lipoic acid metabolism; <br>Dehydrogenase complexes; <br>TCA Cycle
fig|720555.3.peg.1705	CDS	Contig8	1693450	1690616	-1	-	2835	2-oxoglutarate dehydrogenase E1 component (EC 1.2.4.2)	Dehydrogenase complexes; <br>TCA Cycle
fig|720555.3.peg.1706	CDS	Contig8	1695594	1693678	-3	-	1917	Nitric oxide reductase activation protein NorD	Flavohaemoglobin
fig|720555.3.peg.1707	CDS	Contig8	1696495	1695605	-1	-	891	Nitric oxide reductase activation protein NorQ	Flavohaemoglobin
fig|720555.3.peg.1708	CDS	Contig8	1697171	1696581	-2	-	591	Superoxide dismutase [Cu-Zn] precursor (EC 1.15.1.1)	Oxidative stress; <br>Protection from Reactive Oxygen Species
fig|720555.3.peg.1709	CDS	Contig8	1698509	1697253	-2	-	1257	Gamma-D-glutamyl-meso-diaminopimelate peptidase (EC 3.4.19.11)	- none -
fig|720555.3.peg.1710	CDS	Contig8	1698706	1698873	1	+	168	hypothetical protein	- none -
fig|720555.3.peg.1711	CDS	Contig8	1700153	1698936	-2	-	1218	Macrolide glycosyltransferase (EC 2.4.1.-)	- none -
fig|720555.3.peg.1712	CDS	Contig8	1701016	1700399	-1	-	618	Hypothetical membrane spanning protein YojJ	- none -
fig|720555.3.peg.1713	CDS	Contig8	1701290	1702648	2	+	1359	Multi antimicrobial extrusion protein (Na(+)/drug antiporter), MATE family of MDR efflux pumps	Multidrug Resistance Efflux Pumps
fig|720555.3.peg.1714	CDS	Contig8	1702674	1703516	3	+	843	RsbR, positive regulator of sigma-B	SigmaB stress responce regulation
fig|720555.3.peg.1715	CDS	Contig8	1704214	1703546	-1	-	669	Uncharacterized conserved protein	- none -
fig|720555.3.peg.1716	CDS	Contig8	1704581	1704231	-2	-	351	unknown	- none -
fig|720555.3.peg.1717	CDS	Contig8	1704856	1704578	-1	-	279	hypothetical protein	- none -
fig|720555.3.peg.1718	CDS	Contig8	1705827	1704931	-3	-	897	Protein rarD	- none -
fig|720555.3.peg.1719	CDS	Contig8	1705926	1706381	3	+	456	hypothetical protein	- none -
fig|720555.3.peg.1720	CDS	Contig8	1706660	1706415	-2	-	246	unknown	- none -
fig|720555.3.peg.1721	CDS	Contig8	1707182	1706808	-2	-	375	Gluconate permease, Bsu4004 homolog	D-gluconate and ketogluconates metabolism
fig|720555.3.peg.1722	CDS	Contig8	1708196	1707675	-2	-	522	DNA polymerase, DinB family	- none -
fig|720555.3.peg.1723	CDS	Contig8	1708951	1708583	-1	-	369	Gluconate permease, Bsu4004 homolog	D-gluconate and ketogluconates metabolism
fig|720555.3.peg.1724	CDS	Contig8	1709074	1708961	-1	-	114	Gluconate permease, Bsu4004 homolog	D-gluconate and ketogluconates metabolism
fig|720555.3.peg.1725	CDS	Contig8	1709747	1710136	2	+	390	hypothetical protein	- none -
fig|720555.3.peg.1726	CDS	Contig8	1710308	1710165	-2	-	144	hypothetical protein	- none -
fig|720555.3.peg.1727	CDS	Contig8	1710811	1710476	-1	-	336	Transcriptional regulator, HxlR family	- none -
fig|720555.3.peg.1728	CDS	Contig8	1710937	1711545	1	+	609	Oxygen-insensitive NAD(P)H nitroreductase (EC 1.-.-.-) / Dihydropteridine reductase (EC 1.5.1.34)	- none -
fig|720555.3.peg.1729	CDS	Contig8	1712194	1711592	-1	-	603	Carboxylesterase (EC 3.1.1.1)	- none -
fig|720555.3.peg.1730	CDS	Contig8	1713118	1712195	-1	-	924	Glyoxalase family protein	- none -
fig|720555.3.peg.1731	CDS	Contig8	1713302	1713502	2	+	201	YhjC	- none -
fig|720555.3.peg.1732	CDS	Contig8	1713502	1714992	1	+	1491	Na+/solute symporter	- none -
fig|720555.3.peg.1733	CDS	Contig8	1716429	1715029	-3	-	1401	carboxy-terminal processing protease	- none -
fig|720555.3.peg.1734	CDS	Contig8	1716586	1717287	1	+	702	Putative methyltransferase YodH	- none -
fig|720555.3.peg.1735	CDS	Contig8	1717374	1717640	3	+	267	unknown	- none -
fig|720555.3.peg.1736	CDS	Contig8	1718574	1717684	-3	-	891	D-alanyl-D-alanine carboxypeptidase (EC 3.4.16.4)	Peptidoglycan Biosynthesis; <br>Murein Hydrolases
fig|720555.3.peg.1737	CDS	Contig8	1719289	1718591	-1	-	699	Purine nucleoside phosphorylase (EC 2.4.2.1)	Deoxyribose and Deoxynucleoside Catabolism; <br>Purine conversions; <br>pyrimidine conversions
fig|720555.3.peg.1738	CDS	Contig8	1719481	1719606	1	+	126	hypothetical protein	- none -
fig|720555.3.peg.1739	CDS	Contig8	1719965	1719645	-2	-	321	unknown	- none -
fig|720555.3.peg.1740	CDS	Contig8	1720527	1719997	-3	-	531	hypothetical protein	- none -
fig|720555.3.peg.1741	CDS	Contig8	1720528	1720659	1	+	132	hypothetical protein	- none -
fig|720555.3.peg.1742	CDS	Contig8	1720878	1720702	-3	-	177	hypothetical protein	- none -
fig|720555.3.peg.1743	CDS	Contig8	1720998	1721141	3	+	144	hypothetical protein	- none -
fig|720555.3.peg.1744	CDS	Contig8	1721818	1721138	-1	-	681	hypothetical protein	- none -
fig|720555.3.peg.1745	CDS	Contig8	1722206	1721982	-2	-	225	hypothetical protein	- none -
fig|720555.3.peg.1746	CDS	Contig8	1722570	1722292	-3	-	279	hypothetical protein	- none -
fig|720555.3.peg.1747	CDS	Contig8	1723985	1722567	-2	-	1419	Lysine 2,3-aminomutase (EC 5.4.3.2)	Lysine degradation
fig|720555.3.peg.1748	CDS	Contig8	1724871	1724044	-3	-	828	Beta-lysine acetyltransferase (EC 2.3.1.-)	Lysine degradation
fig|720555.3.peg.1749	CDS	Contig8	1726153	1724849	-1	-	1305	Acetylornithine deacetylase (EC 3.5.1.16)	Arginine Biosynthesis extended
fig|720555.3.peg.1750	CDS	Contig8	1726820	1726167	-2	-	654	Acetyl-CoA:acetoacetyl-CoA transferase, beta subunit (EC 2.8.3.8)	Acetyl-CoA fermentation to Butyrate
fig|720555.3.peg.1751	CDS	Contig8	1727494	1726805	-1	-	690	Acetyl-CoA:acetoacetyl-CoA transferase, alpha subunit (EC 2.8.3.8)	Acetyl-CoA fermentation to Butyrate
fig|720555.3.peg.1752	CDS	Contig8	1728839	1727478	-2	-	1362	Probable aminotransferase yodT (EC 2.6.-.-)	- none -
fig|720555.3.peg.1753	CDS	Contig8	1729112	1728984	-2	-	129	hypothetical protein	- none -
fig|720555.3.peg.1754	CDS	Contig8	1729970	1729191	-2	-	780	involved in maturation of the outermost layer of the spore	- none -
fig|720555.3.peg.1755	CDS	Contig8	1731288	1730008	-3	-	1281	involved in maturation of the outermost layer of the spore	- none -
fig|720555.3.peg.1756	CDS	Contig8	1731648	1731343	-3	-	306	CgeC	- none -
fig|720555.3.peg.1757	CDS	Contig8	1731858	1732277	3	+	420	CgeA	- none -
fig|720555.3.peg.1758	CDS	Contig8	1732286	1733236	2	+	951	hypothetical protein	- none -
fig|720555.3.peg.1759	CDS	Contig8	1734479	1733322	-2	-	1158	phytase	- none -
fig|720555.3.peg.1760	CDS	Contig8	1734593	1734739	2	+	147	hypothetical protein	- none -
fig|720555.3.peg.1761	CDS	Contig8	1734908	1735039	2	+	132	hypothetical protein	- none -
fig|720555.3.peg.1762	CDS	Contig8	1735256	1736335	2	+	1080	Alanine racemase (EC 5.1.1.1)	Pyruvate Alanine Serine Interconversions; <br>Alanine biosynthesis
fig|720555.3.peg.1763	CDS	Contig8	1737825	1739825	3	+	2001	Alpha-amylase (EC 3.2.1.1)	Glycogen metabolism
fig|720555.3.peg.1764	CDS	Contig8	1741254	1740637	-3	-	618	Chitin binding protein	Chitin and N-acetylglucosamine utilization
fig|720555.3.peg.1765	CDS	Contig8	1741707	1742189	3	+	483	putative membrane protein	- none -
fig|720555.3.peg.1766	CDS	Contig8	1742200	1742421	1	+	222	Transcriptional regulator, Cro/CI family	- none -
fig|720555.3.peg.1767	CDS	Contig8	1742560	1743351	1	+	792	membrane protein, putative	- none -
fig|720555.3.peg.1768	CDS	Contig8	1743886	1744758	1	+	873	Transcriptional regulator, AraC family	- none -
fig|720555.3.peg.1769	CDS	Contig8	1745187	1745038	-3	-	150	hypothetical protein	- none -
fig|720555.3.peg.1770	CDS	Contig8	1745597	1745713	2	+	117	hypothetical protein	- none -
fig|720555.3.peg.1771	CDS	Contig8	1746253	1745984	-1	-	270	UPF0457 protein ynzG	- none -
fig|720555.3.peg.1772	CDS	Contig8	1746794	1746360	-2	-	435	Peptide methionine sulfoxide reductase MsrB (EC 1.8.4.12)	Peptide methionine sulfoxide reductase
fig|720555.3.peg.1773	CDS	Contig8	1747328	1746795	-2	-	534	Peptide methionine sulfoxide reductase MsrA (EC 1.8.4.11)	Peptide methionine sulfoxide reductase
fig|720555.3.peg.1774	CDS	Contig8	1747462	1747887	1	+	426	Transcriptional regulator, MarR family	- none -
fig|720555.3.peg.1775	CDS	Contig8	1749261	1747909	-3	-	1353	Na+ driven multidrug efflux pump	- none -
fig|720555.3.peg.1776	CDS	Contig8	1749535	1749341	-1	-	195	unknown	- none -
fig|720555.3.peg.1777	CDS	Contig8	1750120	1749557	-1	-	564	hypothetical protein	- none -
fig|720555.3.peg.1778	CDS	Contig8	1750900	1750130	-1	-	771	Lipase/Acylhydrolase with GDSL-like motif	- none -
fig|720555.3.peg.1779	CDS	Contig8	1751560	1750979	-1	-	582	Cytochrome oxidase biogenesis protein Sco1/SenC/PrrC, putative copper metallochaperone	Biogenesis of cytochrome c oxidases
fig|720555.3.peg.1780	CDS	Contig8	1752002	1751751	-2	-	252	unknown	- none -
fig|720555.3.peg.1781	CDS	Contig8	1753361	1752093	-2	-	1269	Threonine dehydratase biosynthetic (EC 4.3.1.19)	Branched-Chain Amino Acid Biosynthesis
fig|720555.3.peg.1782	CDS	Contig8	1753542	1754552	3	+	1011	Nitrogen regulation protein NR(I)	Ammonia assimilation
fig|720555.3.peg.1783	CDS	Contig8	1754569	1755207	1	+	639	Hemolysin III	- none -
fig|720555.3.peg.1784	CDS	Contig8	1755874	1755251	-1	-	624	YpkP	- none -
fig|720555.3.peg.1785	CDS	Contig8	1756381	1755875	-1	-	507	Dihydrofolate reductase (EC 1.5.1.3)	Folate Biosynthesis; <br>EC49-61
fig|720555.3.peg.1786	CDS	Contig8	1757172	1756378	-3	-	795	Thymidylate synthase (EC 2.1.1.45)	Folate Biosynthesis; <br>pyrimidine conversions
fig|720555.3.peg.1787	CDS	Contig8	1757796	1757260	-3	-	537	Low temperature requirement C protein	- none -
fig|720555.3.peg.1788	CDS	Contig8	1758429	1757815	-3	-	615	hypothetical protein	- none -
fig|720555.3.peg.1789	CDS	Contig8	1759458	1758685	-3	-	774	Protein-L-isoD(D-D) O-methyltransferase	- none -
fig|720555.3.peg.1790	CDS	Contig8	1759934	1759500	-2	-	435	hypothetical protein	- none -
fig|720555.3.peg.1791	CDS	Contig8	1761696	1760020	-3	-	1677	Dihydroxy-acid dehydratase (EC 4.2.1.9)	Branched-Chain Amino Acid Biosynthesis
fig|720555.3.peg.1792	CDS	Contig8	1762039	1761920	-1	-	120	hypothetical protein	- none -
fig|720555.3.peg.1793	CDS	Contig8	1763130	1762000	-3	-	1131	PBS lyase HEAT-like repeat domain protein	- none -
fig|720555.3.peg.1794	CDS	Contig8	1763813	1763190	-2	-	624	HD domain protein	- none -
fig|720555.3.peg.1795	CDS	Contig8	1764307	1763825	-1	-	483	Glutathione peroxidase family protein	Glutathione: Redox cycle
fig|720555.3.peg.1796	CDS	Contig8	1764651	1765556	3	+	906	Homoserine O-succinyltransferase (EC 2.3.1.46)	Methionine Biosynthesis
fig|720555.3.peg.1797	CDS	Contig8	1765787	1766935	2	+	1149	diglucosyldiacylglycerol synthase (LTA membrane anchor synthesis)	Teichoic and lipoteichoic acids biosynthesis
fig|720555.3.peg.1798	CDS	Contig8	1767222	1767422	3	+	201	Cold shock protein CspD	Cold shock, CspA family of proteins
fig|720555.3.peg.1799	CDS	Contig8	1767656	1767474	-2	-	183	Regulatory protein degR	- none -
fig|720555.3.peg.1800	CDS	Contig8	1767812	1768069	2	+	258	unknown	- none -
fig|720555.3.peg.1801	CDS	Contig8	1768280	1768098	-2	-	183	unknown	- none -
fig|720555.3.peg.1802	CDS	Contig8	1768954	1768283	-1	-	672	hypothetical protein	- none -
fig|720555.3.peg.1803	CDS	Contig8	1769044	1769730	1	+	687	Putative preQ0 transporter	Queuosine-Archaeosine Biosynthesis
fig|720555.3.peg.1804	CDS	Contig8	1769733	1770131	3	+	399	RNase H	- none -
fig|720555.3.peg.1805	CDS	Contig8	1770173	1770301	2	+	129	small acid-soluble spore protein	- none -
fig|720555.3.peg.1806	CDS	Contig8	1771198	1770308	-1	-	891	DNA polymerase I (EC 2.7.7.7)	- none -
fig|720555.3.peg.1807	CDS	Contig8	1771443	1771297	-3	-	147	hypothetical protein	- none -
fig|720555.3.peg.1808	CDS	Contig8	1771776	1771519	-3	-	258	Uncharacterized protein YpbS	- none -
fig|720555.3.peg.1809	CDS	Contig8	1775425	1771841	-1	-	3585	Possible GTPases, GTP1/OBG family	- none -
fig|720555.3.peg.1810	CDS	Contig8	1775715	1775587	-3	-	129	hypothetical protein	- none -
fig|720555.3.peg.1811	CDS	Contig8	1776252	1775746	-3	-	507	hypothetical protein	- none -
fig|720555.3.peg.1812	CDS	Contig8	1777352	1776255	-2	-	1098	Chalcone synthase (EC 2.3.1.74)	- none -
fig|720555.3.peg.1813	CDS	Contig8	1778738	1777425	-2	-	1314	Xanthine permease	Purine Utilization
fig|720555.3.peg.1814	CDS	Contig8	1779319	1778735	-1	-	585	Xanthine phosphoribosyltransferase (EC 2.4.2.22)	- none -
fig|720555.3.peg.1815	CDS	Contig8	1781166	1779661	-3	-	1506	Thermostable carboxypeptidase 1 (EC 3.4.17.19) ## Zinc-requiring, any residue but Pro	- none -
fig|720555.3.peg.1816	CDS	Contig8	1782309	1781311	-3	-	999	2-keto-3-deoxygluconate permease (KDG permease)	- none -
fig|720555.3.peg.1817	CDS	Contig8	1782945	1782355	-3	-	591	4-Hydroxy-2-oxoglutarate aldolase (EC 4.1.3.16) / 2-dehydro-3-deoxyphosphogluconate aldolase (EC 4.1.2.14)	Proline, 4-hydroxyproline uptake and utilization; <br>Glycolate, glyoxylate interconversions; <br>Entner-Doudoroff Pathway; <br>Formaldehyde assimilation: Ribulose monophosphate pathway; <br>D-gluconate and ketogluconates metabolism
fig|720555.3.peg.1818	CDS	Contig8	1783921	1782947	-1	-	975	2-dehydro-3-deoxygluconate kinase (EC 2.7.1.45)	Entner-Doudoroff Pathway
fig|720555.3.peg.1819	CDS	Contig8	1784991	1783975	-3	-	1017	Transcriptional regulator KdgR, KDG operon repressor	- none -
fig|720555.3.peg.1820	CDS	Contig8	1785213	1786040	3	+	828	4-deoxy-L-threo-5-hexosulose-uronate ketol-isomerase (EC 5.3.1.17)	- none -
fig|720555.3.peg.1821	CDS	Contig8	1786041	1786805	3	+	765	5-keto-D-gluconate 5-reductase (EC 1.1.1.69)	D-gluconate and ketogluconates metabolism
fig|720555.3.peg.1822	CDS	Contig8	1788780	1786849	-3	-	1932	DinG family ATP-dependent helicase YpvA	DNA repair, bacterial DinG and relatives
fig|720555.3.peg.1823	CDS	Contig8	1789075	1788884	-1	-	192	Glycerophosphoryl diester phosphodiesterase (EC 3.1.4.46)	Glycerol and Glycerol-3-phosphate Uptake and Utilization
fig|720555.3.peg.1824	CDS	Contig8	1790602	1789445	-1	-	1158	FIG001721: Predicted N6-adenine-specific DNA methylase	Control of cell elongation - division cycle in Bacilli
fig|720555.3.peg.1825	CDS	Contig8	1791425	1791129	-2	-	297	Cell division protein GpsB, coordinates the switch between cylindrical and septal cell wall synthesis by re-localization of PBP1	Control of cell elongation - division cycle in Bacilli
fig|720555.3.peg.1826	CDS	Contig8	1792054	1791497	-1	-	558	FIG005686: hypothetical protein	Control of cell elongation - division cycle in Bacilli
fig|720555.3.peg.1827	CDS	Contig8	1792362	1792138	-3	-	225	spore coat protein (inner)	- none -
fig|720555.3.peg.1828	CDS	Contig8	1793918	1792677	-2	-	1242	Predicted exonuclease	- none -
fig|720555.3.peg.1829	CDS	Contig8	1796183	1793934	-2	-	2250	ATP-dependent RNA helicase	- none -
fig|720555.3.peg.1830	CDS	Contig8	1796794	1796288	-1	-	507	PTS system, glucose-specific IIA component (EC 2.7.1.69)	Trehalose Uptake and Utilization
fig|720555.3.peg.1831	CDS	Contig8	1796944	1797363	1	+	420	unknown	- none -
fig|720555.3.peg.1832	CDS	Contig8	1797868	1797383	-1	-	486	Spore coat protein	- none -
fig|720555.3.peg.1833	CDS	Contig8	1797872	1798150	2	+	279	unknown	- none -
fig|720555.3.peg.1834	CDS	Contig8	1798552	1798181	-1	-	372	unknown	- none -
fig|720555.3.peg.1835	CDS	Contig8	1798842	1798597	-3	-	246	Uncharacterized protein yppD	- none -
fig|720555.3.peg.1836	CDS	Contig8	1800130	1799174	-1	-	957	Uncharacterized protein YppC	Control of cell elongation - division cycle in Bacilli
fig|720555.3.peg.1837	CDS	Contig8	1800179	1800787	2	+	609	Recombination protein RecU	Control of cell elongation - division cycle in Bacilli
fig|720555.3.peg.1838	CDS	Contig8	1800825	1803578	3	+	2754	Multimodular transpeptidase-transglycosylase (EC 2.4.1.129) (EC 3.4.-.-) / Penicillin-binding protein 1A/1B (PBP1)	Peptidoglycan Biosynthesis; <br>Control of cell elongation - division cycle in Bacilli
fig|720555.3.peg.1839	CDS	Contig8	1804161	1803670	-3	-	492	Hypothetical protein in cluster with penicillin-binding protein PBP1, Bacillus type	Control of cell elongation - division cycle in Bacilli
fig|720555.3.peg.1840	CDS	Contig8	1804817	1804158	-2	-	660	Endonuclease III (EC 4.2.99.18)	Control of cell elongation - division cycle in Bacilli
fig|720555.3.peg.1841	CDS	Contig8	1805537	1804836	-2	-	702	Chromosome replication initiation protein dnaD	Control of cell elongation - division cycle in Bacilli
fig|720555.3.peg.1842	CDS	Contig8	1806921	1805629	-3	-	1293	Asparaginyl-tRNA synthetase (EC 6.1.1.22)	tRNA aminoacylation, Glu and Gln; <br>tRNA modification Archaea; <br>tRNA aminoacylation, Asp and Asn
fig|720555.3.peg.1843	CDS	Contig8	1808242	1807061	-1	-	1182	Aspartate aminotransferase (EC 2.6.1.1)	Proline, 4-hydroxyproline uptake and utilization; <br>Methionine Salvage; <br>Threonine and Homoserine Biosynthesis; <br>Glutamine, Glutamate, Aspartate and Asparagine Biosynthesis
fig|720555.3.peg.1844	CDS	Contig8	1808750	1808265	-2	-	486	unknown	- none -
fig|720555.3.peg.1845	CDS	Contig8	1808930	1808760	-2	-	171	unknown	- none -
fig|720555.3.peg.1846	CDS	Contig8	1809112	1808993	-1	-	120	hypothetical protein	- none -
fig|720555.3.peg.1847	CDS	Contig8	1811873	1809081	-2	-	2793	DinG family ATP-dependent helicase YoaA	DNA repair, bacterial DinG and relatives
fig|720555.3.peg.1848	CDS	Contig8	1812385	1812002	-1	-	384	Aspartate 1-decarboxylase (EC 4.1.1.11)	Coenzyme A Biosynthesis
fig|720555.3.peg.1849	CDS	Contig8	1813248	1812388	-3	-	861	Pantoate--beta-alanine ligase (EC 6.3.2.1)	Coenzyme A Biosynthesis
fig|720555.3.peg.1850	CDS	Contig8	1814082	1813249	-3	-	834	3-methyl-2-oxobutanoate hydroxymethyltransferase (EC 2.1.2.11)	Coenzyme A Biosynthesis
fig|720555.3.peg.1851	CDS	Contig8	1814288	1814124	-2	-	165	hypothetical protein	- none -
fig|720555.3.peg.1852	CDS	Contig8	1815306	1814323	-3	-	984	Biotin-protein ligase (EC 6.3.4.15) / Biotin operon repressor	Biotin biosynthesis; <br>Biotin biosynthesis
fig|720555.3.peg.1853	CDS	Contig8	1816484	1815291	-2	-	1194	tRNA nucleotidyltransferase (EC 2.7.7.21) (EC 2.7.7.25)	- none -
fig|720555.3.peg.1854	CDS	Contig8	1817622	1816489	-3	-	1134	FIG040338: Glycosyl transferase	- none -
fig|720555.3.peg.1855	CDS	Contig8	1818329	1817619	-2	-	711	Lmbe-related protein	- none -
fig|720555.3.peg.1856	CDS	Contig8	1818735	1818322	-3	-	414	Methylglyoxal synthase (EC 4.2.3.3)	Methylglyoxal Metabolism; <br>Glutathione: Non-redox reactions
fig|720555.3.peg.1857	CDS	Contig8	1819552	1818749	-1	-	804	Dihydrodipicolinate reductase (EC 1.3.1.26)	Lysine Biosynthesis DAP Pathway
fig|720555.3.peg.1858	CDS	Contig8	1819899	1819564	-3	-	336	MazG nucleotide pyrophosphohydrolase	- none -
fig|720555.3.peg.1859	CDS	Contig8	1819956	1820912	3	+	957	hypothetical protein BH3604	CBSS-393121.3.peg.2760
fig|720555.3.peg.1860	CDS	Contig8	1822121	1820949	-2	-	1173	OXALATE DECARBOXYLASE (EC 4.1.1.2)	- none -
fig|720555.3.peg.1861	CDS	Contig8	1822947	1822153	-3	-	795	hypothetical protein	- none -
fig|720555.3.peg.1862	CDS	Contig8	1823608	1823015	-1	-	594	Hypothetical transmembrane protein CDS_ID OB1773	CBSS-393130.3.peg.129
fig|720555.3.peg.1863	CDS	Contig8	1824488	1823721	-2	-	768	Menaquinone-cytochrome C oxidoreductase, cytochrome C subunit	Ubiquinone Menaquinone-cytochrome c reductase complexes
fig|720555.3.peg.1864	CDS	Contig8	1825195	1824521	-1	-	675	Menaquinone-cytochrome c reductase, cytochrome B subunit	Ubiquinone Menaquinone-cytochrome c reductase complexes; <br>CBSS-393130.3.peg.129
fig|720555.3.peg.1865	CDS	Contig8	1825700	1825197	-2	-	504	Menaquinone-cytochrome C reductase iron-sulfur subunit	Ubiquinone Menaquinone-cytochrome c reductase complexes; <br>CBSS-393130.3.peg.129
fig|720555.3.peg.1866	CDS	Contig8	1826288	1825842	-2	-	447	hypothetical protein	- none -
fig|720555.3.peg.1867	CDS	Contig8	1826883	1826344	-3	-	540	BH1670 unknown conserved protein in B. subtilis	CBSS-393130.3.peg.129
fig|720555.3.peg.1868	CDS	Contig8	1828260	1826959	-3	-	1302	TPR-repeat-containing protein, putative component of Menaquinone-cytochrome C reductase	Ubiquinone Menaquinone-cytochrome c reductase complexes; <br>CBSS-393130.3.peg.129
fig|720555.3.peg.1869	CDS	Contig8	1828506	1828369	-3	-	138	hypothetical protein	- none -
fig|720555.3.peg.1870	CDS	Contig8	1829867	1828581	-2	-	1287	5-Enolpyruvylshikimate-3-phosphate synthase (EC 2.5.1.19)	Common Pathway For Synthesis of Aromatic Compounds (DAHP synthase to chorismate); <br>Chorismate Synthesis
fig|720555.3.peg.1871	CDS	Contig8	1830994	1829879	-1	-	1116	Prephenate dehydrogenase (EC 1.3.1.12)	Chorismate Synthesis; <br>Phenylalanine and Tyrosine Branches from Chorismate
fig|720555.3.peg.1872	CDS	Contig8	1832127	1831045	-3	-	1083	Biosynthetic Aromatic amino acid aminotransferase beta (EC 2.6.1.57) @ Histidinol-phosphate aminotransferase (EC 2.6.1.9)	Histidine Biosynthesis; <br>Phenylalanine and Tyrosine Branches from Chorismate
fig|720555.3.peg.1873	CDS	Contig8	1832942	1832139	-2	-	804	Tryptophan synthase alpha chain (EC 4.2.1.20)	Tryptophan synthesis
fig|720555.3.peg.1874	CDS	Contig8	1834137	1832935	-3	-	1203	Tryptophan synthase beta chain (EC 4.2.1.20)	Tryptophan synthesis
fig|720555.3.peg.1875	CDS	Contig8	1834774	1834118	-1	-	657	Phosphoribosylanthranilate isomerase (EC 5.3.1.24)	Tryptophan synthesis
fig|720555.3.peg.1876	CDS	Contig8	1835531	1834779	-2	-	753	Indole-3-glycerol phosphate synthase (EC 4.1.1.48)	Tryptophan synthesis
fig|720555.3.peg.1877	CDS	Contig8	1836540	1835524	-3	-	1017	Anthranilate phosphoribosyltransferase (EC 2.4.2.18)	Tryptophan synthesis
fig|720555.3.peg.1878	CDS	Contig8	1838059	1836512	-1	-	1548	Anthranilate synthase, aminase component (EC 4.1.3.27)	Chorismate: Intermediate for synthesis of PAPA antibiotics, PABA, anthranilate, 3-hydroxyanthranilate and more.; <br>Tryptophan synthesis
fig|720555.3.peg.1879	CDS	Contig8	1838661	1838278	-3	-	384	Chorismate mutase II (EC 5.4.99.5)	Chorismate Synthesis; <br>Phenylalanine and Tyrosine Branches from Chorismate
fig|720555.3.peg.1880	CDS	Contig8	1839731	1838658	-2	-	1074	3-dehydroquinate synthase (EC 4.2.3.4)	Common Pathway For Synthesis of Aromatic Compounds (DAHP synthase to chorismate); <br>Chorismate Synthesis
fig|720555.3.peg.1881	CDS	Contig8	1840936	1839746	-1	-	1191	Chorismate synthase (EC 4.2.3.5)	Common Pathway For Synthesis of Aromatic Compounds (DAHP synthase to chorismate); <br>Chorismate Synthesis
fig|720555.3.peg.1882	CDS	Contig8	1841760	1840990	-3	-	771	Chemotaxis protein methyltransferase CheR (EC 2.1.1.80)	Bacterial Chemotaxis
fig|720555.3.peg.1883	CDS	Contig8	1842430	1841984	-1	-	447	Nucleoside diphosphate kinase (EC 2.7.4.6)	Purine conversions; <br>pyrimidine conversions
fig|720555.3.peg.1884	CDS	Contig8	1843515	1842553	-3	-	963	Heptaprenyl diphosphate synthase component II (EC 2.5.1.30)	Polyprenyl Diphosphate Biosynthesis
fig|720555.3.peg.1885	CDS	Contig8	1844245	1843544	-1	-	702	Ubiquinone/menaquinone biosynthesis methyltransferase UbiE (EC 2.1.1.-)	Menaquinone and Phylloquinone Biosynthesis
fig|720555.3.peg.1886	CDS	Contig8	1845006	1844251	-3	-	756	Heptaprenyl diphosphate synthase component I (EC 2.5.1.30)	Polyprenyl Diphosphate Biosynthesis
fig|720555.3.peg.1887	CDS	Contig8	1845399	1845172	-3	-	228	Transcription attenuation protein mtrB	- none -
fig|720555.3.peg.1888	CDS	Contig8	1845994	1845422	-1	-	573	GTP cyclohydrolase I (EC 3.5.4.16) type 1	Zinc regulated enzymes; <br>Queuosine-Archaeosine Biosynthesis; <br>Folate Biosynthesis
fig|720555.3.peg.1889	CDS	Contig8	1846470	1846192	-3	-	279	DNA-binding protein HBsu	DNA structural proteins, bacterial
fig|720555.3.peg.1890	CDS	Contig8	1848312	1846834	-3	-	1479	Stage IV sporulation protein A	Sporulation gene orphans
fig|720555.3.peg.1891	CDS	Contig8	1849238	1848507	-2	-	732	ABC transporter periplasmic binding protein yphF	- none -
fig|720555.3.peg.1892	CDS	Contig8	1849412	1849260	-2	-	153	hypothetical protein	- none -
fig|720555.3.peg.1893	CDS	Contig8	1850840	1849803	-2	-	1038	Glycerol-3-phosphate dehydrogenase [NAD(P)+] (EC 1.1.1.94)	Glutaredoxins; <br>Glycerolipid and Glycerophospholipid Metabolism in Bacteria; <br>Glycerol and Glycerol-3-phosphate Uptake and Utilization
fig|720555.3.peg.1894	CDS	Contig8	1852168	1850858	-1	-	1311	GTP-binding protein EngA	Universal GTPases
fig|720555.3.peg.1895	CDS	Contig8	1852520	1852326	-2	-	195	hypothetical protein	- none -
fig|720555.3.peg.1896	CDS	Contig8	1853410	1852517	-1	-	894	putative membrane protein	- none -
fig|720555.3.peg.1897	CDS	Contig8	1854009	1853407	-3	-	603	unknown	- none -
fig|720555.3.peg.1898	CDS	Contig8	1854090	1854221	3	+	132	hypothetical protein	- none -
fig|720555.3.peg.1899	CDS	Contig8	1855329	1854274	-3	-	1056	Isopentenyl-diphosphate delta-isomerase, FMN-dependent (EC 5.3.3.2)	Isoprenoid Biosynthesis; <br>Isoprenoid Biosynthesis: Interconversions
fig|720555.3.peg.1900	CDS	Contig8	1856484	1855336	-3	-	1149	SSU ribosomal protein S1p	- none -
fig|720555.3.peg.1901	CDS	Contig8	1857392	1856706	-2	-	687	Cytidylate kinase (EC 2.7.4.14)	pyrimidine conversions
fig|720555.3.peg.1902	CDS	Contig8	1857647	1857471	-2	-	177	alternate gene name: jofB	- none -
fig|720555.3.peg.1903	CDS	Contig8	1858350	1857694	-3	-	657	alternate gene name: jofA	- none -
fig|720555.3.peg.1904	CDS	Contig8	1859795	1858446	-2	-	1350	Spore germination protein YpeB	Spore germination
fig|720555.3.peg.1905	CDS	Contig8	1860759	1859830	-3	-	930	Spore cortex-lytic enzyme, lytic transglycosylase SleB	Spore germination
fig|720555.3.peg.1906	CDS	Contig8	1861560	1860904	-3	-	657	hypothetical protein	- none -
fig|720555.3.peg.1907	CDS	Contig8	1862666	1861692	-2	-	975	Thioredoxin reductase (EC 1.8.1.9)	Thioredoxin-disulfide reductase; <br>pyrimidine conversions
fig|720555.3.peg.1908	CDS	Contig8	1864048	1862774	-1	-	1275	NAD-specific glutamate dehydrogenase (EC 1.4.1.2)	Glutamate dehydrogenases; <br>Glutamine, Glutamate, Aspartate and Asparagine Biosynthesis
fig|720555.3.peg.1909	CDS	Contig8	1864800	1864216	-3	-	585	Negative regulator of genetic competence MecA	- none -
fig|720555.3.peg.1910	CDS	Contig8	1865756	1864968	-2	-	789	YpbG	- none -
fig|720555.3.peg.1911	CDS	Contig8	1866358	1865840	-1	-	519	unknown	- none -
fig|720555.3.peg.1912	CDS	Contig8	1867203	1866364	-3	-	840	hypothetical protein	- none -
fig|720555.3.peg.1913	CDS	Contig8	1867789	1867154	-1	-	636	CAAX amino terminal protease family protein	- none -
fig|720555.3.peg.1914	CDS	Contig8	1869273	1867783	-3	-	1491	ATP-dependent DNA helicase, RecQ family	DNA repair, bacterial RecFOR pathway
fig|720555.3.peg.1915	CDS	Contig8	1870417	1869266	-1	-	1152	hypothetical protein YpbB	- none -
fig|720555.3.peg.1916	CDS	Contig8	1870592	1870840	2	+	249	Ferredoxin	Soluble cytochromes and functionally related electron carriers; <br>Inorganic Sulfur Assimilation
fig|720555.3.peg.1917	CDS	Contig8	1871490	1870912	-3	-	579	Substrate-specific component RibU of riboflavin ECF transporter	ECF class transporters; <br>Riboflavin, FMN and FAD metabolism
fig|720555.3.peg.1918	CDS	Contig8	1872001	1873578	1	+	1578	D-3-phosphoglycerate dehydrogenase (EC 1.1.1.95)	Glycine and Serine Utilization; <br>Pyridoxin (Vitamin B6) Biosynthesis; <br>Serine Biosynthesis
fig|720555.3.peg.1919	CDS	Contig8	1874383	1873628	-1	-	756	3-dehydroquinate dehydratase I (EC 4.2.1.10)	Common Pathway For Synthesis of Aromatic Compounds (DAHP synthase to chorismate); <br>Chorismate Synthesis; <br>Quinate degradation
fig|720555.3.peg.1920	CDS	Contig8	1875583	1874522	-1	-	1062	Sigma-X negative effector	- none -
fig|720555.3.peg.1921	CDS	Contig8	1876142	1875558	-2	-	585	RNA polymerase sigma factor sigX	- none -
fig|720555.3.peg.1922	CDS	Contig8	1878113	1876326	-2	-	1788	Sensor histidine kinase ResE (EC 2.7.3.-)	Two-component Response Regulator of Virulence ResDE
fig|720555.3.peg.1923	CDS	Contig8	1878832	1878110	-1	-	723	DNA-binding response regulator ResD	Two-component Response Regulator of Virulence ResDE
fig|720555.3.peg.1924	CDS	Contig8	1880090	1878915	-2	-	1176	Cytochrome c-type biogenesis protein CcsA/ResC	Biogenesis of c-type cytochromes; <br>CBSS-196164.1.peg.461
fig|720555.3.peg.1925	CDS	Contig8	1881740	1880112	-2	-	1629	Cytochrome c-type biogenesis protein Ccs1/ResB	Biogenesis of c-type cytochromes
fig|720555.3.peg.1926	CDS	Contig8	1882276	1881737	-1	-	540	Cytochrome c-type biogenesis protein ResA	Biogenesis of c-type cytochromes
fig|720555.3.peg.1927	CDS	Contig8	1883100	1882366	-3	-	735	Ribosomal large subunit pseudouridine synthase B (EC 4.2.1.70) ## LSU Psi2605	- none -
fig|720555.3.peg.1928	CDS	Contig8	1883729	1883193	-2	-	537	Spore maturation protein B	Spore Core Dehydration
fig|720555.3.peg.1929	CDS	Contig8	1884324	1883734	-3	-	591	Spore maturation protein A	Spore Core Dehydration
fig|720555.3.peg.1930	CDS	Contig8	1885463	1884312	-2	-	1152	Penicillin-binding protein DacC	Spore Core Dehydration
fig|720555.3.peg.1931	CDS	Contig8	1886127	1885588	-3	-	540	hypothetical protein	- none -
fig|720555.3.peg.1932	CDS	Contig8	1886770	1886177	-1	-	594	Segregation and condensation protein B	Two cell division clusters relating to chromosome partitioning
fig|720555.3.peg.1933	CDS	Contig8	1887515	1886760	-2	-	756	Segregation and condensation protein A	Two cell division clusters relating to chromosome partitioning
fig|720555.3.peg.1934	CDS	Contig8	1887781	1887662	-1	-	120	hypothetical protein	- none -
fig|720555.3.peg.1935	CDS	Contig8	1887910	1888434	1	+	525	DUF309 domain-containing protein	- none -
fig|720555.3.peg.1936	CDS	Contig8	1888824	1888450	-3	-	375	ribT protein	- none -
fig|720555.3.peg.1937	CDS	Contig8	1889404	1888940	-1	-	465	6,7-dimethyl-8-ribityllumazine synthase (EC 2.5.1.9)	Riboflavin, FMN and FAD metabolism
fig|720555.3.peg.1938	CDS	Contig8	1890631	1889435	-1	-	1197	3,4-dihydroxy-2-butanone 4-phosphate synthase / GTP cyclohydrolase II (EC 3.5.4.25)	riboflavin to FAD; <br>Riboflavin, FMN and FAD metabolism; <br>Riboflavin, FMN and FAD metabolism
fig|720555.3.peg.1939	CDS	Contig8	1891293	1890646	-3	-	648	Riboflavin synthase alpha chain (EC 2.5.1.9)	riboflavin to FAD; <br>Riboflavin, FMN and FAD metabolism
fig|720555.3.peg.1940	CDS	Contig8	1892395	1891304	-1	-	1092	Diaminohydroxyphosphoribosylaminopyrimidine deaminase (EC 3.5.4.26) / 5-amino-6-(5-phosphoribosylamino)uracil reductase (EC 1.1.1.193)	Riboflavin, FMN and FAD metabolism; <br>Riboflavin, FMN and FAD metabolism
fig|720555.3.peg.1941	CDS	Contig8	1893139	1892795	-1	-	345	unknown	- none -
fig|720555.3.peg.1942	CDS	Contig8	1893936	1893382	-3	-	555	Signal peptidase I (EC 3.4.21.89)	CBSS-176299.4.peg.1292; <br>Signal peptidase
fig|720555.3.peg.1943	CDS	Contig8	1894256	1894050	-2	-	207	hypothetical protein	- none -
fig|720555.3.peg.1944	CDS	Contig8	1895024	1894824	-2	-	201	Cold shock protein CspA	Cold shock, CspA family of proteins
fig|720555.3.peg.1945	CDS	Contig8	1895781	1896815	3	+	1035	YdjN	- none -
fig|720555.3.peg.1946	CDS	Contig8	1897561	1898016	1	+	456	Holin associated hypothetical protein	Murein hydrolase regulation and cell death
fig|720555.3.peg.1947	CDS	Contig8	1899736	1898330	-1	-	1407	hypothetical protein	- none -
fig|720555.3.peg.1948	CDS	Contig8	1900172	1900059	-2	-	114	hypothetical protein	- none -
fig|720555.3.peg.1949	CDS	Contig8	1900783	1900286	-1	-	498	Uncharacterized protein yozF precursor	- none -
fig|720555.3.peg.1950	CDS	Contig8	1902985	1900994	-1	-	1992	Peptidyl-prolyl cis-trans isomerase (EC 5.2.1.8)	- none -
fig|720555.3.peg.1951	CDS	Contig8	1903874	1903434	-2	-	441	Peptidyl-prolyl cis-trans isomerase (EC 5.2.1.8)	- none -
fig|720555.3.peg.1952	CDS	Contig8	1904478	1904263	-3	-	216	Protein-L-isoaspartate O-methyltransferase (EC 2.1.1.77)	tRNA modification Archaea
fig|720555.3.peg.1953	CDS	Contig8	1905011	1904478	-2	-	534	Purine trans deoxyribosylase (Nucleoside deoxyribosyltransferase-I) (EC 2.4.2.6)	Purine conversions; <br>pyrimidine conversions
fig|720555.3.peg.1954	CDS	Contig8	1905343	1905011	-1	-	333	Dihydroorotase (EC 3.5.2.3)	Zinc regulated enzymes; <br>De Novo Pyrimidine Synthesis
fig|720555.3.peg.1955	CDS	Contig8	1905884	1905468	-2	-	417	hypothetical protein	- none -
fig|720555.3.peg.1956	CDS	Contig8	1906291	1905986	-1	-	306	hypothetical protein	- none -
fig|720555.3.peg.1957	CDS	Contig8	1907405	1906737	-2	-	669	Protein of unknown function DUF348:3D:G5	- none -
fig|720555.3.peg.1958	CDS	Contig8	1907860	1907462	-1	-	399	hypothetical protein	- none -
fig|720555.3.peg.1959	CDS	Contig8	1908204	1907857	-3	-	348	hypothetical protein	- none -
fig|720555.3.peg.1960	CDS	Contig8	1908421	1908194	-1	-	228	hypothetical protein	- none -
fig|720555.3.peg.1961	CDS	Contig8	1908946	1909368	1	+	423	hypothetical protein	- none -
fig|720555.3.peg.1962	CDS	Contig8	1910035	1909532	-1	-	504	hypothetical protein	- none -
fig|720555.3.peg.1963	CDS	Contig8	1910868	1910233	-3	-	636	hypothetical protein	- none -
fig|720555.3.peg.1964	CDS	Contig8	1911083	1910868	-2	-	216	hypothetical protein	- none -
fig|720555.3.peg.1965	CDS	Contig8	1911717	1911418	-3	-	300	hypothetical protein	- none -
fig|720555.3.peg.1966	CDS	Contig8	1912402	1912172	-1	-	231	hypothetical protein	- none -
fig|720555.3.peg.1967	CDS	Contig8	1912734	1912480	-3	-	255	hypothetical protein	- none -
fig|720555.3.peg.1968	CDS	Contig8	1915099	1912736	-1	-	2364	DNA polymerase I (EC 2.7.7.7)	- none -
fig|720555.3.peg.1969	CDS	Contig8	1916337	1915687	-3	-	651	Deoxyadenosine kinase (EC 2.7.1.76) / Deoxyguanosine kinase (EC 2.7.1.113)	Purine conversions; <br>Purine conversions
fig|720555.3.peg.1970	CDS	Contig8	1916638	1916369	-1	-	270	hypothetical protein	- none -
fig|720555.3.peg.1971	CDS	Contig8	1917213	1916638	-3	-	576	Thymidine kinase (EC 2.7.1.21)	- none -
fig|720555.3.peg.1972	CDS	Contig8	1918199	1917294	-2	-	906	Phage protein	- none -
fig|720555.3.peg.1973	CDS	Contig8	1918705	1918328	-1	-	378	hypothetical protein	- none -
fig|720555.3.peg.1974	CDS	Contig8	1920191	1919286	-2	-	906	hypothetical protein	- none -
fig|720555.3.peg.1975	CDS	Contig8	1920512	1920378	-2	-	135	hypothetical protein	- none -
fig|720555.3.peg.1976	CDS	Contig8	1921126	1920509	-1	-	618	hypothetical protein	- none -
fig|720555.3.peg.1977	CDS	Contig8	1921881	1921183	-3	-	699	hypothetical protein	- none -
fig|720555.3.peg.1978	CDS	Contig8	1923492	1922749	-3	-	744	hypothetical protein	- none -
fig|720555.3.peg.1979	CDS	Contig8	1924887	1923934	-3	-	954	DNA primase (EC 2.7.7.-)	- none -
fig|720555.3.peg.1980	CDS	Contig8	1925006	1924887	-2	-	120	hypothetical protein	- none -
fig|720555.3.peg.1981	CDS	Contig8	1926435	1925170	-3	-	1266	replicative DNA helicase	- none -
fig|720555.3.peg.1982	CDS	Contig8	1927218	1926448	-3	-	771	DNA replication protein	- none -
fig|720555.3.peg.1983	CDS	Contig8	1928025	1927231	-3	-	795	hypothetical protein	- none -
fig|720555.3.peg.1984	CDS	Contig8	1929136	1928348	-1	-	789	N-acetylmuramoyl-L-alanine amidase	- none -
fig|720555.3.peg.1985	CDS	Contig8	1929621	1929187	-3	-	435	hypothetical protein	- none -
fig|720555.3.peg.1986	CDS	Contig8	1929890	1929753	-2	-	138	hypothetical protein	- none -
fig|720555.3.peg.1987	CDS	Contig8	1933720	1929926	-1	-	3795	hypothetical protein	- none -
fig|720555.3.peg.1988	CDS	Contig8	1935407	1933734	-2	-	1674	RTX toxins and related Ca2+-binding proteins	- none -
fig|720555.3.peg.1989	CDS	Contig8	1938269	1935468	-2	-	2802	hypothetical protein	- none -
fig|720555.3.peg.1990	CDS	Contig8	1939018	1938719	-1	-	300	hypothetical protein	- none -
fig|720555.3.peg.1991	CDS	Contig8	1940583	1940413	-3	-	171	hypothetical protein	- none -
fig|720555.3.peg.1992	CDS	Contig8	1941415	1941215	-1	-	201	hypothetical protein	- none -
fig|720555.3.peg.1993	CDS	Contig8	1942362	1941502	-3	-	861	hypothetical protein	- none -
fig|720555.3.peg.1994	CDS	Contig8	1943040	1942432	-3	-	609	hypothetical protein	- none -
fig|720555.3.peg.1995	CDS	Contig8	1944092	1943151	-2	-	942	hypothetical protein	- none -
fig|720555.3.peg.1996	CDS	Contig8	1945675	1944128	-1	-	1548	hypothetical protein	- none -
fig|720555.3.peg.1997	CDS	Contig8	1947473	1945719	-2	-	1755	hypothetical protein	- none -
fig|720555.3.peg.1998	CDS	Contig8	1948386	1947619	-3	-	768	resolvase	- none -
fig|720555.3.peg.1999	CDS	Contig8	1949306	1948506	-2	-	801	hypothetical protein	- none -
[truncated: 2,437 more rows]
