# Supplementary material for: Genomic Signatures of Strain Selection and Enhancement in Bacillus atrophaeus var. globigii, a Historical Biowarfare Simulant
Source: PLoS One. 2011 Mar 25;6(3):e17836. doi: 10.1371/journal.pone.0017836 (PMC3064580; doi:10.1371/journal.pone.0017836)
Supplement: Table S4 — contains Omnilog phenotypic array data normalized to 1942 strain. (XLSX) [file pone.0017836.s005.xlsx]

## Sheet: Raw Data Modes
Supplementary Table 4: Omnilog phenotype microarray data
plate	well	pheno	mode	1013-2-FC	Detrick-1-FC	Detrick-2-FC	1013-1-FC	Detrick-3-FC	Dugway-FC	1942-FC	1013-2-pv	Detrick-1-pv	Detrick-2-pv	1013-1-pv	Detrick-3-pv	Dugway-pv	1942-pv
PM01	A01	Background	C-Source,Background,,,,,-,-,-,-,-,-,-,-,-,-,-,-	20175.5	25858.5	20002	28286	21662.5	21281.5	25269	0.25893	0.884151	0.236255	0.445418	0.498855	0.379984	1
PM01	A02	L-Arabinose	C-Source,carbohydrate,pentose,arabinose,,,Glycolosis,G3P,Pentose and glucuronate interconversions,-	72062.5	71122	68366.5	66151.5	71256	70234	75483	0.527416	0.394357	0.220075	0.164304	0.40859	0.325503	1
PM01	A03	N-Acetyl-D-Glucosamine	C-Source,carbohydrate,hexose,glucose,amine,,Glycolosis,glucose,Glycosaminoglycan degradation,-,-,-,	54183	69014	54895.5	46001	60076.5	52766	60408	0.170659	0.113487	0.261282	0.00624639	0.80197	0.0323659	1
PM01	A04	D-Saccharic Acid	C-Source,carbohydrate,hexose,glucose,dicarboxylate,,Glycolosis,glucose,Ascorbate and aldarate metab	17206.5	72145.5	38012.5	41386.5	21591	46246	61692	0.00095281	0.0690056	0.0107447	0.0012878	0.000323969	0.000396618	1
PM01	A05	Succinic Acid	C-Source,carboxylate,4 carbon,,,,TCA,succinate,-,-,-,-,-,-,-,-,-,-	14949.5	69027	44870	47649.5	16259	55899.5	63508.5	0.00294639	0.169794	0.0118166	0.00991491	0.00538424	0.0632114	1
PM01	A06	D-Galactose	C-Source,carbohydrate,hexose,galactose,,,Galactose Metabolism,-,-,-,-,-,-,-,-,-,-,-	20791.5	38146	21226	30778.5	24375.5	26022	31117.5	0.281517	0.348898	0.288979	0.962457	0.482745	0.477467	1
PM01	A07	L-Aspartic Acid	C-Source,amino acid,amino acid,Asp,AA,,TCA,oxaloacetate,Asp,-,-,-,-,-,-,-,-,-	30313.5	74036.5	44008	58461	33987.5	56625.5	65125	0.000205651	0.099523	0.00181624	0.182486	0.0358465	0.106087	1
PM01	A08	L-Proline	C-Source,amino acid,amino acid,Pro,AA,-,TCA,oxologlutarate,Glu,-,-,-,-,-,-,-,-,-	20527.5	62703.5	27868	56715	22134.5	54897	53909.5	0.00610407	0.0994623	0.0092631	0.237342	0.0174131	0.637854	1
PM01	A09	D-Alanine	C-Source,amino acid,amino acid,Ala-D,AA,,TCA,oxaloacetate,Pyruvate,Ala,-,-,-,-,-,-,-,-	28337.5	64407.5	39671.5	40518	35196.5	48929	56085	0.0125421	0.115553	0.0357205	0.0239424	0.0489202	0.106956	1
PM01	A10	D-Trehalose	C-Source,carbohydrate,disaccharide,glucose,,,Glycolosis,glucose,-,-,-,-,-,-,-,-,-,-	60321	78311	64324.5	56794.5	71120.5	60534.5	66388.5	0.142036	0.0472305	0.525923	0.055928	0.236814	0.143121	1
PM01	A11	D-Mannose	C-Source,carbohydrate,hexose,mannose,,,Glycolosis,fructose,mannose,-,-,-,-,-,-,-,-,-	66132	73980.5	63703.5	60047.5	66444	60093.5	63411.5	0.456856	0.178507	0.690031	0.386766	0.0307717	0.118102	1
PM01	A12	Dulcitol	C-Source,carbohydrate,hexose,galactose,,,Galactose metabolism,-,-,-,-,-,-,-,-,-,-,-	27302.5	38421.5	23592	38934	30595	27445.5	33591	0.350226	0.40951	0.154817	0.348558	0.736664	0.388508	1
PM01	B01	D-Serine	C-Source,amino acid,amino acid,Ser-D,AA,,TCA,oxaloacetate,Pyruvate,-,-,-,-,-,-,-,-,-	16618.5	17461	12369	17909	15921.5	13306	15917	0.465858	0.2049	0.0509202	0.178977	0.998276	0.287996	1
PM01	B02	D-Sorbitol	C-Source,carbohydrate,hexose,sorbose,,,Glycolosis,mannose,-,-,-,-,-,-,-,-,-,-	62496	69028.5	60764	49252.5	64584	60595	60912	0.050314	0.112554	0.722627	0.00467255	0.00779171	0.863686	1
PM01	B03	Glycerol	C-Source,carbohydrate,3 carbon,glycerol,,,Glycolosis,glycerate,-,-,-,-,-,-,-,-,-,-	60533.5	66232.5	53896	51335.5	58452.5	56368.5	57411.5	0.0521252	0.113721	0.0424292	0.0256423	0.174729	0.553041	1
PM01	B04	L-Fucose	C-Source,carbohydrate,hexose,fucose,,,-,-,-,-,-,-,-,-,-,-,-,-	17379	28467	16450	25998.5	17805	18780	24658.5	0.166238	0.371329	0.130846	0.728227	0.182144	0.231665	1
PM01	B05	D-Glucuronic Acid	C-Source,carbohydrate,hexose,glucose,carboxylate,,Glycolosis,glucose,-,-,-,-,-,-,-,-,-,-	17128.5	21664	12856	22724.5	17891.5	15739.5	21841	0.265111	0.961526	0.117272	0.803786	0.44117	0.217616	1
PM01	B06	D-Gluconic Acid	C-Source,carbohydrate,hexose,glucose,carboxylate,,Glycolosis,glucose,-,-,-,-,-,-,-,-,-,-	65717.5	72475.5	51367.5	55912.5	63716	56882.5	65169	0.815693	0.110445	0.00658888	0.00460686	0.744688	0.00475328	1
PM01	B07	D,L-a-Glycerol Phosphate	C-Source,carbohydrate,3 carbon,glycerol,Phosphate,,Glycolosis,G3P,-,-,-,-,-,-,-,-,-,-	37478.5	60132	32653	45801	39667	35042	47490	0.181572	0.106878	0.0824836	0.745077	0.291192	0.109536	1
PM01	B08	D-Xylose	C-Source,carbohydrate,pentose,xylose,,,Pentose and glucuronate interconversions,-,-,-,-,-,-,-,-,-,-	63562.5	65524.5	54954	63654.5	59323	63085	71504	0.378296	0.241662	0.0453739	0.178445	0.0599819	0.242479	1
PM01	B09	D,L-Lactic acid	C-Source,carboxylate,3 carbon,,,,,,,,,,,,,,,	16612	73395.5	42615	57001.5	39824.5	46783	56815	0.00557468	0.0604154	0.0396821	0.956882	0.177538	0.0742562	1
PM01	B10	Formic Acid	C-Source,carboxylate,1 carbon,,,,Glyoxylate and dicarboxylate metabolism,-,-,-,-,-,-,-,-,-,-,-	15018.5	45294.5	22822.5	31636.5	19187.5	25451.5	34852.5	0.0239287	0.0649456	0.0504715	0.374666	0.0528032	0.100583	1
PM01	B11	D-Mannitol	C-Source,carbohydrate,hexose,mannose,,,Glycolosis,fructose,mannose,-,-,-,-,-,-,-,-,-	63510.5	72318.5	65054.5	55615	66964	61906	63321.5	0.946742	0.248338	0.710252	0.161398	0.326606	0.751726	1
PM01	B12	L-Glutamic Acid	C-Source,amino acid,amino acid,Glu,AA,,TCA,oxologlutarate,Glu,-,-,-,-,-,-,-,-,-	23564	70606.5	55529	56877.5	36010	59834	62034.5	0.00952154	0.429833	0.230537	0.534299	0.0798385	0.626598	1
PM01	C01	D-Glucose-6-Phosphate	C-Source,carbohydrate,hexose,glucose,phosphate,,Glycolosis,glucose,-,-,-,-,-,-,-,-,-,-	24250.5	28011.5	18642.5	29214	18401	19908.5	24114.5	0.972267	0.411144	0.21765	0.222881	0.315515	0.299656	1
PM01	C02	D-Galactonic Acid-g-Lactone	C-Source,carboxylate,6 carbon,galactose,lactone,,Glycolosis,glucose,Glactose metabolism,-,-,-,-,-,-	12437.5	13960	11040	17171	11163.5	11780.5	14537.5	0.426582	0.853691	0.262513	0.354432	0.330147	0.385877	1
PM01	C03	D,L-Malic Acid	C-Source,carboxylate,4 carbon,,,,TCA,malinate,-,-,-,-,-,-,-,-,-,-	47348.5	66742.5	46930	51824.5	55425	50573	54815.5	0.398507	0.0537171	0.0203054	0.361466	0.853534	0.168417	1
PM01	C04	D-Ribose	C-Source,carbohydrate,pentose,ribose,,,Pentose and glucuronate interconversions,-,-,-,-,-,-,-,-,-,-	80428.5	81409	73042.5	72416	75221.5	74168	80599.5	0.9708	0.837	0.0679766	0.0979166	0.127534	0.115069	1
PM01	C05	Tween 20	C-Source,-,-,-,,,-,-,-,-,-,-,-,-,-,-,-,-	12644	39998.5	20664	24218.5	14234	21899.5	30620.5	0.0122421	0.0455166	0.0423501	0.120572	0.0215042	0.0527481	1
PM01	C06	L-Rhamnose	C-Source,carbohydrate,hexose,rhamnose,,,Glycolosis,fructose,mannose,-,-,-,-,-,-,-,-,-	25901.5	49490.5	26389.5	36229.5	26505	34646	43784.5	0.15234	0.407259	0.0771114	0.281596	0.109093	0.350051	1
PM01	C07	D-Fructose	C-Source,carbohydrate,hexose,fructose,,,Glycolosis,fructose,-,-,-,-,-,-,-,-,-,-	64531	74501.5	58137.5	53231.5	65740	55308	62409.5	0.453051	0.0622244	0.214619	0.0874114	0.393254	0.13366	1
PM01	C08	Acetic Acid	C-Source,carboxylate,2 carbon,,,,Pyruvate metabolism,-,-,-,-,-,-,-,-,-,-,-	17930.5	46911	26728.5	30748.5	25892.5	30553.5	42523	0.016264	0.229867	0.0222945	0.051785	0.0239734	0.0325379	1
PM01	C09	a-D-Glucose	C-Source,carbohydrate,hexose,glucose,,,Glycolosis,glucose,-,-,-,-,-,-,-,-,-,-	62318	72921.5	57458.5	53555	63416.5	54057	60728.5	0.118379	0.076305	0.195797	0.142242	0.0101282	0.061935	1
PM01	C10	Maltose	C-Source,carbohydrate,disaccharide,glucose,,,Glycolosis,glucose,-,-,-,-,-,-,-,-,-,-	46221	57961.5	37677	40011.5	47603.5	35561	53710.5	0.377377	0.594878	0.11176	0.140488	0.410002	0.0877671	1
PM01	C11	D-Melibiose	C-Source,carbohydrate,disaccharide,galactose,glucose,,Glycolosis,glucose,Galactose Metabolism,-,-,-	17480.5	34439.5	17456.5	28179	20472.5	19824	25529	0.0415638	0.0813525	0.0149143	0.247582	0.0811526	0.0286554	1
PM01	C12	Thymidine	C-Source,nucleoside,pyrimidine,thymine,,,Pyrimidine Metabolism,-,-,-,-,-,-,-,-,-,-,-	40956.5	67825	48987	49199	57186	46135.5	58182.5	0.00347228	0.223447	0.0134748	0.127061	0.480436	0.0117662	1
PM01	D01	L-Asparagine	C-Source,amino acid,amino acid,Asn,AA,,TCA,oxaloacetate,Asp,Asn,-,-,-,-,-,-,-,-	47417.5	67300.5	56210	55442.5	55776	58626	62472.5	0.0167504	0.194997	0.145683	0.104743	0.0313565	0.187628	1
PM01	D02	D-Aspartic Acid	C-Source,amino acid,amino acid,Asp-D,AA,,TCA,oxaloacetate,Asp,-,-,-,-,-,-,-,-,-	8646	26103.5	14267.5	18690.5	10572	16688.5	20585.5	0.0404573	0.154862	0.131974	0.512019	0.0854529	0.24783	1
PM01	D03	D-Glucosaminic Acid	C-Source,carbohydrate,hexose,glucose,acid,,Glycolosis,glucose,Aminosugars metabolism,-,-,-,-,-,-,-,	10307	21198	11743	19865.5	11649.5	12417	17322.5	0.0460569	0.137349	0.0495017	0.360127	0.051715	0.0575497	1
PM01	D04	1,2-Propanediol	C-Source,alcohol,3 carbon,,,,Glycolosis,oxaloacetate,Pyruvate,pyruvate metabolism,-,-,-,-,-,-,-,-	9530.5	22364.5	11252	20891.5	11487.5	13302	17523.5	0.0589246	0.121718	0.0625047	0.255675	0.0977124	0.149517	1
PM01	D05	Tween 40	C-Source,-,-,-,,,-,-,-,-,-,-,-,-,-,-,-,-	9360	44493.5	19720.5	28558.5	17373.5	22148	29994.5	0.0236858	0.0582045	0.0889949	0.837569	0.145036	0.133484	1
PM01	D06	a-Ketoglutaric Acid	C-Source,carboxylate,5 carbon,,,,TCA,oxologlutarate,Glyoxylate and dicarboxylate metabolism,-,-,-,-	14054.5	42351.5	21163.5	30609	13397.5	23389	33282.5	0.00608439	0.09435	0.019054	0.562229	0.00721814	0.0419243	1
PM01	D07	a-Ketobutyric Acid	C-Source,carboxylate,4 carbon,,,,Glycine, serine and threonine metabolism,-,-,-,-,-,-,-,-,-,-,-	15411.5	25740.5	10613	18409.5	20443	13144.5	24606.5	0.105075	0.541123	0.0132461	0.123364	0.108755	0.025706	1
PM01	D08	a-Methyl-D-Galactoside	C-Source,carbohydrate,hexose,galactose,,,Galactose Metabolism,-,-,-,-,-,-,-,-,-,-,-	11910.5	25735.5	13116.5	24136	15227	15740	20809	0.079324	0.150329	0.0675276	0.298046	0.127623	0.137392	1
PM01	D09	a-D-Lactose	C-Source,carbohydrate,disaccharide,galactose,glucose,,Glycolosis,glucose,Galactose Metabolism,-,-,-	14507.5	29423.5	15566.5	25388	17381	17098.5	23321	0.076351	0.14352	0.0461562	0.514341	0.0268196	0.0443257	1
PM01	D10	Lactulose	C-Source,carbohydrate,disaccharide,galactose,fructose,,Glycolosis,glucose,Galactose Metabolism,-,-,	14465.5	30501.5	16839	26816	17562.5	18304.5	24907.5	0.0496634	0.211902	0.0612351	0.530199	0.0585813	0.0859142	1
PM01	D11	Sucrose	C-Source,carbohydrate,disaccharide,glucose,fructose,,Glycolosis,glucose,Starch and sucrose metaboli	51679.5	70427.5	60399	44047	64466.5	57668	63562.5	0.0495783	0.116277	0.033449	0.0022144	0.340437	0.0458307	1
PM01	D12	Uridine	C-Source,nucleoside,pyrimidine,uracil,,,Pyrimidine Metabolism,-,-,-,-,-,-,-,-,-,-,-	29422.5	57370	33933	45461	46043.5	39429	53132	0.0111253	0.351469	0.000937801	0.0313535	0.0367359	0.00335345	1
PM01	E01	L-Glutamine	C-Source,amino acid,amino acid,Gln,AA,,TCA,oxologlutarate,glutamate,Gln,-,-,-,-,-,-,-,-	16282.5	65019.5	38084	41154.5	33049.5	42849.5	55660.5	0.00315154	0.0600622	0.0179396	0.0225683	0.100848	0.0362837	1
PM01	E02	m-Tartaric Acid	C-Source,carboxylate,,,,,TCA,oxaloacetate,Glyoxylate and dicarboxylate metabolism,-,-,-,-,-,-,-,-,-	8898	51878.5	24319.5	31878.5	23087	21464	29911.5	0.00661147	0.00269329	0.0739612	0.544324	0.062174	0.0232904	1
PM01	E03	D-Glucose-1-Phosphate	C-Source,carbohydrate,hexose,glucose,phosphate,,Glycolosis,glucose,-,-,-,-,-,-,-,-,-,-	9571	21038.5	11867.5	20282	12224.5	13017	17410	0.0717514	0.0911113	0.0204147	0.314542	0.00573897	0.0912723	1
PM01	E04	D-Fructose-6-Phosphate	C-Source,carbohydrate,hexose,fructose,phosphate,,Glycolosis,fructose,-,-,-,-,-,-,-,-,-,-	30672.5	29855	21756	31972.5	18259.5	27068	34859	0.646716	0.451978	0.135366	0.670289	0.0927885	0.329438	1
PM01	E05	Tween 80	C-Source,-,-,-,,,-,-,-,-,-,-,-,-,-,-,-,-	9017.5	41481	14873	26372.5	20539	17726	20989.5	0.0471564	0.0119636	0.0285043	0.353089	0.886617	0.245212	1
PM01	E06	a-Hydroxyglutaric Acid-g-Lactone	C-Source,amino acid,amino acid,Glu,,,Glycolosis,glucose,-,-,-,-,-,-,-,-,-,-	9803.5	24213.5	12290	22968	11070	14944	19782	0.0544104	0.187585	0.0783142	0.324951	0.0611348	0.177722	1
PM01	E07	a-Hydroxybutyric Acid	C-Source,carboxylate,4 carbon,,,,TCA,oxaloacetate,Pyruvate,gly ser thr metablolism,-,-,-,-,-,-,-,-	11701.5	33143	22539.5	28942.5	12847.5	22724.5	30423.5	0.0145626	0.0614405	0.0548512	0.693752	0.0188492	0.107824	1
PM01	E08	b-Methyl-D-Glucoside	C-Source,carbohydrate,hexose,glucose,,,Glycolosis,glucose,-,-,-,-,-,-,-,-,-,-	22258	71345.5	56020	46404	63538	54934	60740	0.00661381	0.0596731	0.0552062	0.0204901	0.0285521	0.189334	1
PM01	E09	Adonitol	C-Source,carbohydrate,pentose,ribose,,,Pentose and glucuronate interconversions,-,-,-,-,-,-,-,-,-,-	12361.5	27362	14525.5	24721.5	15588.5	16943	22253.5	0.0655125	0.154053	0.0675488	0.470173	0.0885943	0.139267	1
PM01	E10	Maltotriose	C-Source,carbohydrate,trisaccharide,glucose,,,Glycolosis,glucose, 3.2.1.116,-,-,-,-,-,-,-,-,-	41220	58184.5	44425.5	40744.5	53601.5	40083.5	41936	0.873228	0.0421605	0.0460203	0.517352	0.00332391	0.523134	1
PM01	E11	2'-Deoxyadenosine	C-Source,nucleoside,purine,adenine,,,Purine Metabolism,-,-,-,-,-,-,-,-,-,-,-	16999.5	38776.5	18778	30908.5	24885.5	20503	31809.5	0.0288457	0.169846	0.0255184	0.730588	0.103231	0.0249405	1
PM01	E12	Adenosine	C-Source,nucleoside,purine,adenine,,,Purine Metabolism,-,-,-,-,-,-,-,-,-,-,-	22556	43588.5	23742	38157	33032.5	25491.5	32208	0.0411868	0.0375887	0.0557743	0.130064	0.902541	0.0778328	1
PM01	F01	Gly-Asp	C-Source,amino acid,dipeptide,Gly,Asp,,TCA,oxaloacetate,Pyruvate,Gly,-,-,TCA,oxaloacetate,Asp,-,-,-	15877	54546	31762.5	38431.5	36227	35086	45851.5	0.0257449	0.265497	0.103401	0.380382	0.223013	0.161749	1
PM01	F02	Citric Acid	C-Source,carboxylate,6 carbon,,,,TCA,Citrate,-,-,-,-,-,-,-,-,-,-	36681.5	66132	34148.5	37033.5	13713.5	41702.5	55816	0.0364678	0.0153925	0.00376783	0.0122934	0.00102533	0.0263016	1
PM01	F03	m-Inositol	C-Source,carbohydrate,hexose,inositol,,,Galactose Metabolism,galactose,-,-,-,-,-,-,-,-,-,-	19688.5	60878.5	39211	35609	42020	41447.5	47943	0.0041234	0.0879352	0.0336379	0.0288382	0.0767585	0.283948	1
PM01	F04	D-Threonine	C-Source,amino acid,amino acid,Thr-D,AA,,TCA,oxaloacetate,Pyruvate,Thr,-,-,-,-,-,-,-,-	8799	12970	7134.5	10665	11019	8129	10141	0.641984	0.402279	0.251839	0.875626	0.644333	0.421247	1
PM01	F05	Fumaric Acid	C-Source,carboxylate,4 carbon,,,,TCA,fumarate,-,-,-,-,-,-,-,-,-,-	52204.5	72292.5	62093	56218.5	55997.5	58453.5	60964	0.0823397	0.0757399	0.492491	0.308593	0.0201598	0.597362	1
PM01	F06	Bromosuccinic Acid	C-Source,carboxylate,4 carbon,,,,TCA,succinate,-,-,-,-,-,-,-,-,-,-	27455.5	52553	25222	37664	33888.5	29032	36214.5	0.0107111	0.0284396	0.0228444	0.676335	0.445252	0.118938	1
PM01	F07	Propionic Acid	C-Source,carboxylate,3 carbon,,,,Propanoate metabolism,-,-,-,-,-,-,-,-,-,-,-	16415	28161	14954	27338.5	18878.5	15413.5	28752	0.0476315	0.605055	0.0405867	0.210711	0.0268302	0.00968115	1
PM01	F08	Mucic Acid	C-Source,carbohydrate,hexose,galactose,acid,,Galactose Metabolism,-,-,-,-,-,-,-,-,-,-,-	15777	63211.5	27032.5	33433.5	14815	28559	48678	0.00559578	0.0417891	0.0168515	0.15123	0.00737105	0.0168982	1
PM01	F09	Glycolic Acid	C-Source,carboxylate,2 carbon,,,,Glyoxylate and dicarboxylate metabolism,-,-,-,-,-,-,-,-,-,-,-	19126.5	20757	12401	22498.5	13916.5	14248.5	18379.5	0.876095	0.347736	0.0448705	0.345789	0.145146	0.246314	1
PM01	F10	Glyoxylic Acid	C-Source,carboxylate,2 carbon,,,,Glyoxylate and dicarboxylate metabolism,-,-,-,-,-,-,-,-,-,-,-	14339	19114.5	16156	20218	18064	17025	18550	0.290711	0.877949	0.520661	0.614315	0.881332	0.638326	1
PM01	F11	D-Cellobiose	C-Source,carbohydrate,disaccharide,glucose,,,Glycolosis,glucose,-,-,-,-,-,-,-,-,-,-	50851	60424	37270	40456	48291.5	35844	49223.5	0.665139	0.0745735	0.080153	0.11398	0.860647	0.055981	1
PM01	F12	Inosine	C-Source,nucleoside,purine,hypoxanthine,,,Purine Metabolism,-,-,-,-,-,-,-,-,-,-,-	23346.5	49412	29740.5	40167	40517.5	31881.5	43626	0.0109722	0.109968	0.0151541	0.178164	0.447328	0.0201694	1
PM01	G01	Gly-Glu	C-Source,amino acid,dipeptide,Gly,Glu,,TCA,oxaloacetate,Pyruvate,Gly,-,-,TCA,oxaloglutarate,Glu,-,-	14790.5	58777	37521	44393.5	40962.5	40760	51951.5	0.00435701	0.182082	0.0130971	0.120914	0.0222046	0.0377988	1
PM01	G02	Tricarballylic Acid	C-Source,carboxylate,6 carbon,,,,-,-,-,-,-,-,-,-,-,-,-,-	13323	16849.5	11786	18878	10790.5	12958.5	14611.5	0.643978	0.26919	0.188629	0.194579	0.167899	0.521656	1
PM01	G03	L-Serine	C-Source,amino acid,amino acid,Ser,AA,,TCA,oxaloacetate,Pyruvate,-,-,-,-,-,-,-,-,-	9580.5	38885.5	19039	11616	19274.5	27067	22292.5	0.265693	0.170694	0.825126	0.327003	0.820945	0.672457	1
PM01	G04	L-Threonine	C-Source,amino acid,amino acid,Thr,AA,,TCA,oxaloacetate,Pyruvate,Thr,-,-,-,-,-,-,-,-	11661	57582	30254.5	31661	24051.5	33790	47863	0.00638455	0.016129	0.0218359	0.00727286	0.00123134	0.0612348	1
PM01	G05	L-Alanine	C-Source,amino acid,amino acid,Ala,AA,,TCA,oxaloacetate,Pyruvate,-,-,-,-,-,-,-,-,-	28591.5	70340	50768.5	38751	35648.5	59307	61579.5	0.0365117	0.219825	0.0449581	0.0343118	0.00801521	0.628535	1
PM01	G06	Ala-Gly	C-Source,amino acid,dipeptide,Ala,Gly,,TCA,oxaloacetate,Pyruvate,Ala,-,-,TCA,oxaloacetate,Pyruvate,	10375	61203.5	33799.5	34123.5	37177.5	36657.5	45971.5	0.00883042	0.0786495	0.0561703	0.113023	0.0135535	0.210325	1
PM01	G07	Acetoacetic Acid	C-Source,carboxylate,4 carbon,,,,Pyruvate metabolism,-,-,-,-,-,-,-,-,-,-,-	21690.5	40430	30579	31942.5	27068	32219	43034.5	0.0454582	0.373521	0.0319901	0.0830081	0.0171133	0.106131	1
PM01	G08	N-Acetyl-D-Mannosamine	C-Source,carbohydrate,hexose,mannose,amine,,Glycolosis,fructose,mannose,-,-,-,-,-,-,-,-,-	13471.5	34179	17241	26285.5	21900	19425	25739	0.0317045	0.0630483	0.0741754	0.847181	0.0305641	0.0953751	1
PM01	G09	Mono-Methylsuccinate	C-Source,carboxylate,4 carbon,,,,TCA,succinate,-,-,-,-,-,-,-,-,-,-	13055.5	47559.5	16147	46650.5	16242	18555.5	24007.5	0.0444568	0.00710337	0.0673831	0.00253085	0.0332056	0.209175	1
PM01	G10	Methylpyruvate	C-Source,carboxylate,3 carbon,,,,Pyruvate metabolism,-,-,-,-,-,-,-,-,-,-,-	24175	64251.5	34213.5	47597.5	44175	36247	48275.5	0.0467786	0.0648534	0.0812481	0.902962	0.456722	0.136988	1
PM01	G11	D-Malic Acid	C-Source,carboxylate,4 carbon,,,,TCA,succinate,Butonanate metabolism,-,-,-,-,-,-,-,-,-	16159	36225	17711	33159	17233.5	18745.5	26028.5	0.0847142	0.0452625	0.0802907	0.144678	0.070661	0.095809	1
PM01	G12	L-Malic Acid	C-Source,carboxylate,4 carbon,,,,TCA,malinate,-,-,-,-,-,-,-,-,-,-	57931	76476	63780.5	69155	68947	62105	67400.5	0.0953406	0.0843448	0.424796	0.592639	0.741683	0.199406	1
PM01	H01	Gly-Pro	C-Source,amino acid,dipeptide,Gly,Pro,,TCA,oxaloacetate,Pyruvate,Gly,-,-,TCA,oxaloglutarate,glutama	15421.5	46769.5	26703	34893	28725	27084	31508.5	0.0788496	0.116067	0.382581	0.537633	0.623148	0.438517	1
PM01	H02	p-Hydroxyphenyl Acetic Acid	C-Source,carboxylate,aromatic,,,,TCA,Citrate,acetyl CoA,tryrosine metabolism,-,-,-,-,-,-,-,-	15461	23842	14990	24796.5	16792.5	16825.5	19929	0.469252	0.364199	0.303478	0.388521	0.377739	0.589068	1
PM01	H03	m-Hydroxyphenyl Acetic Acid	C-Source,carboxylate,aromatic,,,,TCA,Citrate,acetyl CoA,tryrosine metabolism,-,-,-,-,-,-,-,-	12091.5	20879.5	12763	21834.5	15724	14667.5	17096	0.444749	0.528872	0.459305	0.484666	0.7432	0.695678	1
PM01	H04	Tyramine	C-Source,amino acid,intermediate,Tyramine,AA,,TCA,succinate,tyr metabolism,-,-,-,-,-,-,-,-,-	15054.5	25904	16678.5	25716	21957.5	18873.5	21968	0.376418	0.541264	0.422193	0.598667	0.998262	0.667543	1
PM01	H05	D-Psicose	C-Source,carbohydrate,hexose,,,,-,-,-,-,-,-,-,-,-,-,-,-	31723	37530	22206	34236	23208	26682.5	36077	0.652994	0.758813	0.0828769	0.729125	0.0403716	0.255285	1
PM01	H06	L-Lyxose	C-Source,carbohydrate,pentose,lyxose,,,Pentose and glucuronate interconversions,-,-,-,-,-,-,-,-,-,-	64487	67646	57931	70708	61821	66946.5	73621.5	0.36614	0.209378	0.0691098	0.540138	0.0268973	0.413792	1
PM01	H07	Glucuronamide	C-Source,carbohydrate,hexose,glucose,amide,,Glycolosis,glucose,-,-,-,-,-,-,-,-,-,-	27796	32884	20299	32905.5	22260	24025.5	28987	0.778648	0.426828	0.155831	0.479727	0.0582345	0.39409	1
PM01	H08	Pyruvic Acid	C-Source,carboxylate,3 carbon,,,,Pyruvate metabolism,-,-,-,-,-,-,-,-,-,-,-	36331.5	75335	56500	63021	62451.5	56055	62126.5	0.000530854	0.0443435	0.140321	0.756048	0.820052	0.326198	1
PM01	H09	L-Galactonic Acid-g-Lactone	C-Source,carboxylate,6 carbon,galactose,lactone,,Glycolosis,glucose,Ascorbate and aldarate metaboli	12430	18959.5	13771.5	20683	13813.5	14386.5	17599.5	0.416521	0.811168	0.48922	0.608983	0.53293	0.564401	1
PM01	H10	D-Galacturonic Acid	C-Source,carbohydrate,hexose,galactose,acid,,Galactose Metabolism,-,-,-,-,-,-,-,-,-,-,-	63043.5	63077.5	46549	47197	57174	46117	58295.5	0.277517	0.468475	0.0364329	0.127171	0.797385	0.112385	1
PM01	H11	b-Phenylethylamine	C-Source,amino acid,intermediate,b-Phenylethylamine,AA,,TCA,Citrate,acetyl CoA,Phe,-,-,-,-,-,-,-,-	19634	33567	17757.5	30316	22140	20059	25169.5	0.314696	0.178364	0.173932	0.31715	0.269754	0.279595	1
PM01	H12	2-Aminoethanol	C-Source,alcohol,2 carbon,amine,,,Glycolosis,G3P,glycerolipid metabolism,-,-,-,-,-,-,-,-,-	23660	33473.5	20106.5	33302.5	27269	23554.5	29548.5	0.258142	0.22042	0.0938719	0.367986	0.284001	0.255658	1
PM02	A01	Background	C-Source,Background,,,,,-,-,-,-,-,-,-,-,-,-,-,-	17101.5	23421.5	22938.5	23112.5	19986.5	22441	21589.5	0.245355	0.496633	0.620087	0.592061	0.651131	0.765187	1
PM02	A02	Chondroitin Sulfate C	C-Source,carbohydrate,oligosaccharide,glucose,galactose,,Glycolosis,glucose,Glycosaminoglycan degra	13275.5	19886.5	20028.5	20042.5	15352.5	20331.5	19644	0.208415	0.939989	0.894709	0.872077	0.298013	0.836956	1
PM02	A03	a-Cyclodextrin	C-Source,carbohydrate,oligosaccharide,maltose,,,-,-,-,-,-,-,-,-,-,-,-,-	13804	22668	23140	21196.5	17895.5	23732.5	22301.5	0.0606115	0.805151	0.62994	0.491602	0.23577	0.543702	1
PM02	A04	b-Cyclodextrin	C-Source,carbohydrate,oligosaccharide,maltose,,,-,-,-,-,-,-,-,-,-,-,-,-	15511.5	21497.5	22260	23478	17193	25759	24947.5	0.0237683	0.0698001	0.109411	0.249993	0.0667638	0.633653	1
PM02	A05	g-Cyclodextrin	C-Source,carbohydrate,oligosaccharide,maltose,,,-,-,-,-,-,-,-,-,-,-,-,-	34771	45196.5	37225.5	35608.5	44311.5	37942	41487	0.394771	0.131691	0.25265	0.000289665	0.205085	0.00661234	1
PM02	A06	Dextrin	C-Source,carbohydrate,oligosaccharide,,,,-,-,-,-,-,-,-,-,-,-,-,-	59714.5	61455.5	54573.5	43746.5	56259	49041	53007.5	0.108704	0.0314888	0.153967	0.0296004	0.0298295	0.0216316	1
PM02	A07	Gelatin	C-Source,carbohydrate,oligosaccharide,,,,-,-,-,-,-,-,-,-,-,-,-,-	16197	29288.5	27384	25953	18959	24898	23573	0.0276047	0.0029289	0.0428116	0.5826	0.0319984	0.0579773	1
PM02	A08	Glycogen	C-Source,carbohydrate,oligosaccharide,,,,-,-,-,-,-,-,-,-,-,-,-,-	39194.5	51250	42283.5	38055.5	50723.5	35314.5	40821	0.89238	0.0270047	0.264913	0.118771	0.0113677	0.0159898	1
PM02	A09	Inulin	C-Source,carbohydrate,oligosaccharide,,,,-,-,-,-,-,-,-,-,-,-,-,-	21343.5	63056.5	53180	21947	45615	20620.5	18941.5	0.773443	0.000270418	0.000406912	0.0532963	0.00923206	0.411597	1
PM02	A10	Laminarin	C-Source,carbohydrate,oligosaccharide,,,,-,-,-,-,-,-,-,-,-,-,-,-	15869	26661.5	25543.5	23646	19638.5	23824.5	20215.5	0.233738	0.06546	0.0551807	0.148324	0.862551	0.215562	1
PM02	A11	Mannan	C-Source,carbohydrate,oligosaccharide,,,,-,-,-,-,-,-,-,-,-,-,-,-	21462.5	30106.5	29346	30118	25949	28423	25275.5	0.0524131	0.0281403	0.00922219	0.00665149	0.767181	0.0914893	1
PM02	A12	Pectin	C-Source,carbohydrate,oligosaccharide,galacturonate,acid,,-,-,-,-,-,-,-,-,-,-,-,-	45105.5	43453.5	40202	40830.5	44828	41878.5	39269.5	0.0702104	0.113845	0.646559	0.32302	0.0776297	0.217883	1
PM02	B01	N-Acetyl-D-Galactosamine	C-Source,carbohydrate,hexose,galactose,amine,,Galactose Metabolism,-,-,-,-,-,-,-,-,-,-,-	15765.5	23009.5	22220.5	23850.5	19014.5	21358.5	21658	0.0125057	0.0524129	0.564836	0.275254	0.126035	0.557375	1
PM02	B02	N-Acetyl-Neuraminic Acid	C-Source,carbohydrate,11-carbon,neuraminic,amine,,-,-,-,-,-,-,-,-,-,-,-,-	7207.5	10961	11409.5	14707.5	7837.5	12145.5	12691.5	0.00179479	0.021342	0.0128799	0.192945	0.0127951	0.316841	1
PM02	B03	b-D-Allose	C-Source,carbohydrate,pentose,,,,-,-,-,-,-,-,-,-,-,-,-,-	7817.5	16166	12250	9090	11737	9839	11197.5	0.228919	0.0310999	0.342639	0.10457	0.64147	0.197842	1
PM02	B04	Amygdalin	C-Source,carbohydrate,disaccharide,glucose,aromatic,,Glycolosis,glucose,-,-,-,-,-,-,-,-,-,-	23628	51248.5	38922	31800	44289.5	36973.5	45356	0.00237661	0.205714	0.0247356	0.0282518	0.623829	0.0295139	1
PM02	B05	D-Arabinose	C-Source,carbohydrate,pentose,arabinose,,,Glycolosis,G3P,Pentose and glucuronate interconversions,-	56255.5	59733	55114	48304.5	52359.5	49589	52122	0.262217	0.0529687	0.419843	0.319775	0.839948	0.292246	1
PM02	B06	D-Arabitol	C-Source,carbohydrate,pentose,arabinose,,,Glycolosis,G3P,Pentose and glucuronate interconversions,-	10045	18398	17396	14896.5	12342.5	13855.5	12550	0.337158	0.076793	0.080572	0.298419	0.948627	0.574288	1
PM02	B07	L-Arabitol	C-Source,carbohydrate,pentose,arabinose,,,Glycolosis,G3P,Pentose and glucuronate interconversions,-	9338.5	20575	19441.5	17700	11940.5	15882	16229.5	0.00461327	0.0116747	0.0561432	0.101511	0.0941971	0.60284	1
PM02	B08	Arbutin	C-Source,carbohydrate,hexose,aromatic,,,Glycolosis,glucose,-,-,-,-,-,-,-,-,-,-	78872	81915.5	80520	72524	80622	76182	77120.5	0.739576	0.483916	0.608609	0.504764	0.506761	0.884727	1
PM02	B09	2-Deoxy-D-Ribose	C-Source,carbohydrate,pentose,ribose,,,Pentose and glucuronate interconversions,-,-,-,-,-,-,-,-,-,-	59365.5	62942.5	55929.5	57905.5	55992	62497	66351.5	0.271574	0.312657	0.0608612	0.185642	0.0323054	0.274098	1
PM02	B10	i-Erythritol	C-Source,carbohydrate,4 carbon,,,,-,-,-,-,-,-,-,-,-,-,-,-	12212	21727	19428.5	18249.5	14556.5	17528.5	17196.5	0.0325235	0.0341268	0.128256	0.384936	0.319133	0.788318	1
PM02	B11	D-Fucose	C-Source,carbohydrate,hexose,fucose,,,-,-,-,-,-,-,-,-,-,-,-,-	16487	25507.5	23371.5	25687.5	19317.5	24368.5	24616	0.126411	0.830347	0.773787	0.831559	0.236919	0.951737	1
PM02	B12	3-0-b-D-Galactopyranosyl-D-Arabinose	C-Source,carbohydrate,disaccharide,galactose,arabinose,,Galactose Metabolism,-,-,-,-,-,-,-,-,-,-,-	24667	26556	25145.5	29372	23967.5	31361.5	32086.5	0.0109268	0.0316835	0.0418659	0.0856283	0.0183749	0.448737	1
PM02	C01	Gentiobiose	C-Source,carbohydrate,disaccharide,glucose,,,Glycolosis,glucose,-,-,-,-,-,-,-,-,-,-	40748.5	48937.5	39718.5	37745	44991.5	38989.5	46027	0.591744	0.344547	0.0456446	0.0229782	0.526895	0.0231182	1
PM02	C02	L-Glucose	C-Source,carbohydrate,hexose,glucose,,,Glycolosis,glucose,-,-,-,-,-,-,-,-,-,-	8636	16502	15824	15085.5	11448.5	13799.5	14765	0.0850389	0.0999226	0.293212	0.689547	0.086729	0.455298	1
PM02	C03	D-Lactitol	C-Source,carbohydrate,disaccharide,galactose,glucitol,,Glycolosis,glucose,Galactose Metabolism,-,-,	6697.5	15052	14393	13433.5	8987.5	11480.5	12133	0.00855123	0.0343642	0.171314	0.280184	0.0242563	0.119367	1
PM02	C04	D-Melezitose	C-Source,carbohydrate,pentose,lyxose,,,Pentose and glucuronate interconversions,-,-,-,-,-,-,-,-,-,-	8293	18035	16508	16268	11079.5	14966.5	14802.5	0.0462664	0.05937	0.253167	0.259766	0.0749028	0.901449	1
PM02	C05	Maltitol	C-Source,carbohydrate,disaccharide,glucose,sorbitol,,Glycolosis,glucose,-,-,-,-,-,-,-,-,-,-	26685.5	46691.5	36193	30088.5	41020	33854	41918.5	0.194008	0.343137	0.050585	0.0238929	0.213314	0.00268314	1
PM02	C06	a-Methyl-D-Galactoside	C-Source,carbohydrate,hexose,galactose,,,Galactose Metabolism,-,-,-,-,-,-,-,-,-,-,-	36961	45219	32658	31518	39748.5	32129.5	39109.5	0.733371	0.256068	0.0301172	0.105296	0.741362	0.0333976	1
PM02	C07	b-Methyl-D-Galactoside	C-Source,carbohydrate,hexose,galactose,,,Galactose Metabolism,-,-,-,-,-,-,-,-,-,-,-	8689.5	19072	18225	18199.5	11319	15226.5	15432.5	0.0015308	0.0369392	0.0790997	0.147333	0.0148515	0.623878	1
PM02	C08	3-Methylglucose	C-Source,carbohydrate,hexose,glucose,,,Glycolosis,glucose,-,-,-,-,-,-,-,-,-,-	12298	25330	22761.5	21491.5	15386	19693.5	20657	0.11544	0.253364	0.678816	0.860766	0.175546	0.815145	1
PM02	C09	b-Methyl-D-Glucuronic Acid	C-Source,carbohydrate,hexose,glucose,acid,,Glycolosis,glucose,-,-,-,-,-,-,-,-,-,-	10669.5	19414	18488.5	19416	12687.5	16247.5	16559	0.221277	0.444455	0.642399	0.498255	0.251618	0.923551	1
PM02	C10	a-Methyl-D-Mannoside	C-Source,carbohydrate,hexose,mannose,,,Glycolosis,fructose,mannose,-,-,-,-,-,-,-,-,-	11683.5	22125.5	19916	18698	14174	17229	17890.5	0.0428599	0.0715929	0.299469	0.584827	0.184498	0.633061	1
PM02	C11	b-Methyl-D-Xyloside	C-Source,carbohydrate,pentose,xylose,,,Pentose and glucuronate interconversions,-,-,-,-,-,-,-,-,-,-	12908	23542	21863.5	19395.5	15999	18213.5	17928	0.0791511	0.115671	0.238451	0.621433	0.322752	0.873757	1
PM02	C12	Palatinose	C-Source,carbohydrate,disaccharide,glucose,fructose,,Glycolosis,glucose,-,-,-,-,-,-,-,-,-,-	59872	63542.5	51130	56808	60757.5	56583.5	59956.5	0.99126	0.641695	0.149064	0.618419	0.874575	0.537864	1
PM02	D01	D-Raffinose	C-Source,carbohydrate,trisaccharide,galactose, glucose, fructose,Glycolosis,glucose,-,-,-,-,-,-,-,-	13994	24154.5	22580	22706	18532	20728.5	23057.5	0.0142849	0.261953	0.625603	0.851576	0.0182178	0.105091	1
PM02	D02	Salicin	C-Source,carbohydrate,hexose,glucose,aromatic,,Glycolosis,glucose,-,-,-,-,-,-,-,-,-,-	49736	60614	55216	41065	58123.5	51839.5	55280.5	0.134449	0.137609	0.968229	0.0142345	0.259632	0.110399	1
PM02	D03	Sedoheptulosan	C-Source,carbohydrate,7 carbon,,,,-,-,-,-,-,-,-,-,-,-,-,-	7600	15675.5	14822.5	15561	9979.5	13697.5	14962.5	0.0269048	0.710972	0.955168	0.770043	0.083886	0.47194	1
PM02	D04	L-Sorbose	C-Source,carbohydrate,hexose,sorbose,,,Glycolosis,fructose,mannose,-,-,-,-,-,-,-,-,-	13340	21639.5	16965.5	14926	11659	17492	20343.5	0.0761778	0.308727	0.23821	0.155907	0.0114837	0.192084	1
PM02	D05	Stachyose	C-Source,carbohydrate,oligosaccharide,glucose,fructose,galactose,Glycolosis,glucose,Galactose Metab	6339.5	16333.5	15121.5	14534	9143	12518.5	14164.5	0.01247	0.0281417	0.33327	0.596352	0.0342427	0.137458	1
PM02	D06	D-Tagatose	C-Source,carbohydrate,hexose,tagulose,,,Galactose Metabolism,galactose,-,-,-,-,-,-,-,-,-,-	36895	39365	34212.5	34787.5	27196.5	36305	41143	0.280168	0.432516	0.185129	0.285856	0.0242513	0.279243	1
PM02	D07	Turanose	C-Source,carbohydrate,disaccharide,glucose,fructose,,Glycolosis,glucose,-,-,-,-,-,-,-,-,-,-	25997.5	53010	43284	32004.5	41572.5	39255	46994	0.0398497	0.269691	0.197189	0.0538444	0.21351	0.10623	1
PM02	D08	Xylitol	C-Source,carbohydrate,pentose,xylose,,,Pentose and glucuronate interconversions,-,-,-,-,-,-,-,-,-,-	9260.5	20121.5	18436	17037.5	11274.5	20455	23462.5	0.0191239	0.177032	0.164099	0.0912573	0.00957751	0.143818	1
PM02	D09	N-Acetyl-D-glucosaminitol	C-Source,carbohydrate,pentose,xylose,,,Pentose and glucuronate interconversions,-,-,-,-,-,-,-,-,-,-	11283	21395.5	19049	20094.5	13300.5	20568	22672	0.104367	0.78463	0.504889	0.626559	0.1168	0.665043	1
PM02	D10	g-Amino-N-Butyric Acid	C-Source,carboxylate,4 carbon,,,,TCA,oxologlutarate,Glu,-,-,-,-,-,-,-,-,-	10472	38836	25824	24653.5	12171	27474.5	36450	0.0116112	0.548147	0.0303002	0.0414661	0.00515084	0.0428279	1
PM02	D11	d-Amino Valeric Acid	C-Source,carboxylate,5 carbon,,,,-,-,-,-,-,-,-,-,-,-,-,-	11134.5	19735.5	18011.5	18660	13457.5	16690	17482.5	0.0621302	0.293112	0.842972	0.668378	0.0998367	0.691788	1
PM02	D12	Butyric Acid	C-Source,carboxylate,4 carbon,,,,TCA,oxologlutarate,Butonanate metabolism,-,-,-,-,-,-,-,-,-	23113.5	36919.5	32455.5	29783	28470	29559	32613.5	0.0761323	0.315903	0.960193	0.331227	0.211717	0.327059	1
PM02	E01	Capric Acid	C-Source,carboxylate,fatty acid,10 carbon,,,-,-,-,-,-,-,-,-,-,-,-,-	18951.5	21423.5	20046	11769	20627.5	13384.5	13386.5	0.0279606	0.0028231	0.0199019	0.347653	0.043565	0.996872	1
PM02	E02	Caproic Acid	C-Source,carboxylate,fatty acid,6 carbon,,,-,-,-,-,-,-,-,-,-,-,-,-	10432.5	24815.5	20397	21526.5	17335	23722	29394.5	0.0187146	0.268302	0.0297543	0.0543088	0.0185505	0.0735296	1
PM02	E03	Citraconic Acid	C-Source,carboxylate,fatty acid,5 carbon,,,-,-,-,-,-,-,-,-,-,-,-,-	12617	13056	12551.5	15587	7309	12064.5	13443	0.634635	0.8986	0.711131	0.421504	0.0770878	0.539247	1
PM02	E04	D,L-Citramalic Acid	C-Source,carboxylate,fatty acid,5 carbon,,,-,-,-,-,-,-,-,-,-,-,-,-	5684	12645	11688	13832.5	8467	11740	12514.5	0.0305088	0.924016	0.534352	0.46752	0.0531419	0.508811	1
PM02	E05	D-Glucosamine	C-Source,carbohydrate,hexose,glucose,amine,,Glycolosis,glucose,-,-,-,-,-,-,-,-,-,-	80734	64168	61443.5	70290.5	60226	71025.5	76560.5	0.134026	0.0577939	0.0294971	0.130278	0.0174444	0.200356	1
PM02	E06	2-Hydroxybenzoic acid	C-Source,carboxylate,aromatic,,,,-,-,-,-,-,-,-,-,-,-,-,-	10227	12500	9793	9271	6884.5	10743	11596	0.241035	0.446581	0.384113	0.234116	0.0169972	0.289358	1
PM02	E07	4-Hydroxybenzoic Acid	C-Source,carboxylate,aromatic,,,,TCA,Citrate,acetyl CoA,phenylalanine metabolism,-,-,-,-,-,-,-,-	16410	24255.5	23007	25080.5	15690.5	23922	26934	0.208668	0.488557	0.360698	0.729231	0.0878244	0.418158	1
PM02	E08	b-Hydroxybutyric Acid	C-Source,carboxylate,4 carbon,,,,TCA,oxaloacetate,pyruvate,Butonanate metabolism,-,-,-,-,-,-,-,-	11192.5	27075.5	20484	19216.5	17695	22361.5	30992.5	0.0637603	0.335606	0.0740081	0.0659895	0.0650777	0.0680686	1
PM02	E09	g-Hydroxybutyric Acid	C-Source,carboxylate,4 carbon,,,,TCA,succinate,Butonanate metabolism,-,-,-,-,-,-,-,-,-	10179	24286.5	22167.5	19562	14940.5	17671.5	18422.5	0.0711876	0.145457	0.354969	0.681469	0.31725	0.754652	1
PM02	E10	2-Oxovaleric acid	C-Source,carboxylate,3 carbon,,,,Pyruvate metabolism,-,-,-,-,-,-,-,-,-,-,-	17456	25916.5	18750	18365	18361	23207	28775	0.203777	0.626927	0.190278	0.157231	0.148209	0.365887	1
PM02	E11	Itaconic Acid	C-Source,carboxylate,5 carbon,,,,Pyruvate metabolism,pyruvate,C5-Branched dibasic acid metabolism,-	9806.5	15461.5	15151	19982.5	12295	14771	15599.5	0.228572	0.969818	0.904134	0.327842	0.330076	0.810834	1
PM02	E12	5-Keto-D-Gluconic Acid	C-Source,carbohydrate,hexose,glucose,acid,,Glycolosis,glucose,-,-,-,-,-,-,-,-,-,-	61639	64921	60318	58808.5	58598.5	59128	62237	0.790998	0.457403	0.634221	0.450321	0.238486	0.330851	1
PM02	F01	D-Lactic Acid Methyl Ester	C-Source,carboxylate,3 carbon,,,,Pyruvate metabolism,-,-,-,-,-,-,-,-,-,-,-	13698.5	24998.5	23181.5	48822	17512	51749	58742	0.000538014	0.00209822	0.00258858	0.0100863	0.00134328	0.0157393	1
PM02	F02	Malonic Acid	C-Source,carboxylate,3 carbon,,,,beta-alanine metabolism,-,-,-,-,-,-,-,-,-,-,-	18927	15414	15119	18677	9870.5	15721.5	17524.5	0.45191	0.256434	0.197545	0.56339	0.0329561	0.272215	1
PM02	F03	Melibionic Acid	C-Source,carbohydrate,disaccharide,glucose,gluconic acid,,Glycolosis,glucose,-,-,-,-,-,-,-,-,-,-	8838.5	18592.5	17782	19572	13388	19068	21911.5	0.0539485	0.384475	0.343692	0.584414	0.119949	0.455651	1
PM02	F04	Oxalic Acid	C-Source,carboxylate,,,,,TCA,oxaloacetate,Glyoxylate and dicarboxylate metabolism,-,-,-,-,-,-,-,-,-	19291	19767	18094	16523	15307.5	15551.5	17635	0.527307	0.468048	0.856824	0.702145	0.39979	0.483848	1
PM02	F05	Oxalomalic Acid	C-Source,carboxylate,6 carbon,,,,TCA,oxaloacetate,Glyoxylate and dicarboxylate metabolism,-,-,-,-,-	31530.5	35930.5	34161.5	36319.5	30250	39214	41498	0.324994	0.318757	0.186486	0.392332	0.290943	0.599824	1
PM02	F06	Quinic Acid	C-Source,carboxylate,7 carbon,,,,TCA,Citrate,acetyl CoA,phenylalanine metabolism,-,-,-,-,-,-,-,-	10256	18045	15495.5	17245	10222.5	15230	18653	0.166621	0.870117	0.443624	0.748004	0.11447	0.36446	1
PM02	F07	D-Ribono-1,4-Lactone	C-Source,carbohydrate,pentose,ribose,,,Pentose and glucuronate interconversions,-,-,-,-,-,-,-,-,-,-	9324.5	12182	11748	15288.5	8068	13095	14127	0.369842	0.703864	0.660679	0.833056	0.253494	0.826767	1
PM02	F08	Sebacic Acid	C-Source,carboxylate,10 carbon,,,,-,-,-,-,-,-,-,-,-,-,-,-	8256	16489.5	14312.5	15918.5	11220	14327	15986	0.25366	0.921291	0.767012	0.990157	0.383667	0.750812	1
PM02	F09	Sorbic Acid	C-Source,carboxylate,,,,,-,-,-,-,-,-,-,-,-,-,-,-	30096	37160	33139	35895.5	36324.5	48061.5	53710.5	0.204428	0.0455357	0.0197596	0.0393068	0.021181	0.23855	1
PM02	F10	Succinamic Acid	C-Source,carboxylate,4 carbon,,,,TCA,succinate,-,-,-,-,-,-,-,-,-,-	11107	26848	23852	19426.5	13261	18194	20964	0.131439	0.216923	0.454131	0.744398	0.136554	0.50863	1
PM02	F11	D-Tartaric Acid	C-Source,carboxylate,4 carbon,-,,,-,-,-,-,-,-,-,-,-,-,-,-	11521	16911	14157	13601	13881	14087.5	14844.5	0.384391	0.532748	0.841237	0.7309	0.728086	0.809324	1
PM02	F12	L-Tartaric Acid	C-Source,carboxylate,4 carbon,,,,TCA,oxaloacetate,Glyoxylate and dicarboxylate metabolism,-,-,-,-,-	16856.5	27048	25009.5	23536	20131	22715	22313	0.0495007	0.0640054	0.19274	0.43382	0.227489	0.784101	1
PM02	G01	Acetamide	C-Source,amide,2 carbon,,,,-,-,-,-,-,-,-,-,-,-,-,-	13209.5	22347	20254	22011.5	17963	20287	22399.5	0.0552649	0.985107	0.482801	0.917948	0.23458	0.517758	1
PM02	G02	L-Alaninamide	C-Source,-,-,-,,,-,-,-,-,-,-,-,-,-,-,-,-	9980	18753.5	17843.5	20448	12271.5	19120	21746.5	0.0505575	0.386546	0.249057	0.697589	0.070813	0.386283	1
PM02	G03	N-Acetyl-L-Glutamic Acid	C-Source,amino acid,intermediate,N-Acetyl-D,L-Glutamic Acid,AA,,TCA,oxologlutarate,Glu,-,-,-,-,-,-,	8008.5	16081.5	15010.5	16870	10054	14433.5	16139	0.186508	0.989097	0.805158	0.870187	0.265482	0.692658	1
PM02	G04	L-Arginine	C-Source,amino acid,amino acid,Arg,AA,,TCA,oxologlutarate,glutamate,Arg,-,-,-,-,-,-,-,-	15157.5	54599.5	38068	32513.5	37959	36094	46353	0.0187402	0.249636	0.158271	0.110581	0.217429	0.146606	1
PM02	G05	Glycine	C-Source,amino acid,amino acid,Gly,AA,,TCA,oxaloacetate,Pyruvate,Gly,-,-,-,-,-,-,-,-	8505	21178.5	19491	17779.5	16875	17095	17517.5	0.261181	0.594438	0.778034	0.968733	0.929239	0.946214	1
PM02	G06	L-Histidine	C-Source,amino acid,amino acid,His,AA,,TCA,oxologlutarate,glutamate,His,-,-,-,-,-,-,-,-	10189.5	46019	32246	29096.5	9660.5	28870.5	44628	0.023483	0.854928	0.10292	0.194197	0.020696	0.103225	1
PM02	G07	L-Homoserine	C-Source,amino acid,intermediate,L-Homoserine,AA,,TCA,oxaloacetate,Pyruvate,gly ser thr metablolism	7740	12445.5	11129	13947	11735.5	12285	12744.5	0.32999	0.943145	0.734884	0.806587	0.791253	0.91178	1
PM02	G08	Hydroxy-L-Proline	C-Source,amino acid,intermediate,Hydroxy-L-Proline,AA,,TCA,oxologlutarate,glutamate,glutamate semia	8978.5	16508.5	15114	10449.5	17405	10806.5	16343	0.170534	0.96279	0.769888	0.276944	0.723518	0.288348	1
PM02	G09	L-Isoleucine	C-Source,amino acid,amino acid,Ile,AA,,TCA,succinyl CoA,Propionyl CoA,Ile,-,-,-,-,-,-,-,-	12551.5	32549	22257.5	21937	18215.5	21797	32252	0.0458464	0.950948	0.158405	0.165255	0.0751094	0.149381	1
PM02	G10	L-Leucine	C-Source,amino acid,amino acid,Leu,AA,,TCA,Citrate,acetyl CoA,Leu,-,-,-,-,-,-,-,-	13908.5	32623.5	25154.5	24247	20589	24444.5	27511	0.0581404	0.253367	0.593786	0.480426	0.174447	0.454802	1
PM02	G11	L-Lysine	C-Source,amino acid,amino acid,Lys,AA,,TCA,Citrate,acetyl CoA,Lys,-,-,-,-,-,-,-,-	12788.5	22296.5	21765.5	21026.5	16541.5	20313	21085.5	0.166337	0.775644	0.882296	0.990112	0.357615	0.854564	1
PM02	G12	L-Methionine	C-Source,amino acid,amino acid,Met,AA,,TCA,succinyl CoA,propanoate metabolism,gly ser thr metabloli	17853.5	25879.5	23022.5	27494	25762	25761	28305	0.0596647	0.420874	0.27706	0.820882	0.399566	0.393968	1
PM02	H01	L-Ornithine	C-Source,amino acid,intermediate,L-Ornithine,AA,,Urea cycle,ornithine,-,-,-,-,-,-,-,-,-,-	20238	51058.5	40071.5	39340	39048.5	44867.5	54416.5	0.0155879	0.66349	0.105058	0.0684087	0.0615604	0.199602	1
PM02	H02	L-Phenylalanine	C-Source,amino acid,amino acid,Phe,AA,,TCA,Citrate,acetyl CoA,Phe,-,-,-,-,-,-,-,-	12593.5	20687.5	19469	14930.5	18448.5	17930.5	18597	0.248274	0.664759	0.866164	0.689016	0.979385	0.891401	1
PM02	H03	L-Pyroglutamic Acid	C-Source,amino acid,intermediate,5-Oxo-L-proline,AA,,TCA,oxologlutarate,Glu,-,-,-,-,-,-,-,-,-	9190	24678	21052	21196.5	12914.5	19700.5	22293	0.114077	0.689185	0.838375	0.852282	0.214804	0.675413	1
PM02	H04	L-Valine	C-Source,amino acid,amino acid,Val,AA,,TCA,succinyl CoA,Val,-,-,-,-,-,-,-,-,-	14996	29411.5	25698.5	22199	19597	25176	33426	0.0798826	0.57342	0.32506	0.214667	0.152329	0.305615	1
PM02	H05	D,L-Carnitine	C-Source,carboxylate,7 carbon,,,,TCA,Citrate,acetyl CoA,lysine degadation,-,-,-,-,-,-,-,-	12794.5	23013.5	20412	19331.5	16920	18151	18170	0.471804	0.556803	0.783499	0.885859	0.871271	0.997988	1
PM02	H06	Sec-Butylamine	C-Source,amine,4 carbon,,,,-,-,-,-,-,-,-,-,-,-,-,-	10637.5	17563.5	15804.5	19515	11190.5	17901	20772.5	0.346033	0.730621	0.617495	0.892116	0.353466	0.74839	1
PM02	H07	D,L-Octopamine	C-Source,amine,aromatic,,,,-,-,-,-,-,-,-,-,-,-,-,-	18656	22602.5	20718	19140.5	20441.5	19027.5	22166.5	0.657523	0.949143	0.844656	0.682246	0.783678	0.656848	1
PM02	H08	Putrescine	C-Source,amino acid,intermediate,Putrescine,AA,,TCA,oxologlutarate,glutamate,Arg,-,-,-,-,-,-,-,-	13112.5	24020.5	21198.5	19531.5	19689	21107	25396.5	0.243755	0.843751	0.611281	0.506935	0.450911	0.593288	1
PM02	H09	Dihydroxyacetone	C-Source,carbohydrate,2 carbon,,,,Glycolosis,G3P,-,-,-,-,-,-,-,-,-,-	67366.5	70988	68133.5	62315	68516	64553.5	68222.5	0.854843	0.674465	0.989151	0.476828	0.959931	0.590735	1
PM02	H10	2,3-Butanediol	C-Source,alcohol,4 carbon,,,,Pyruvate metabolism,-,-,-,-,-,-,-,-,-,-,-	16375	30747.5	25113	27413	24053.5	26113	31113.5	0.172177	0.959158	0.467	0.632892	0.39532	0.52224	1
PM02	H11	2,3-Butanone	C-Source,carbohydrate,4 carbon,,,,Pyruvate metabolism,-,-,-,-,-,-,-,-,-,-,-	44262	48376	41361.5	38517.5	44580	36965	46349	0.736895	0.787235	0.559431	0.413583	0.810188	0.301399	1
PM02	H12	3-Hydroxy 2-Butanone	C-Source,alcohol,4 carbon,,,,Pyruvate metabolism,-,-,-,-,-,-,-,-,-,-,-	21774.5	27398	26687.5	30850.5	23912.5	28817.5	30771.5	0.151456	0.480016	0.441885	0.988105	0.196787	0.683259	1
PM03	A01	Background	N-Source,Background,,,,,-,-,-,-,-,-,-,-,-,-,-,-	17896.5	18805.5	17196	16435	20187	20103	21095.5	0.127542	0.258086	0.154997	0.103236	0.481149	0.379645	1
PM03	A02	Ammonia	N-Source,nitrogen,NH3,,,,Urea cycle,-,-,-,-,-,-,-,-,-,-,-	31812.5	30608	29097	29024.5	29533	27292	30312	0.203964	0.857013	0.587555	0.195654	0.684523	0.0813465	1
PM03	A03	Nitrite	N-Source,nitrogen,N02,,,,Urea cycle,,,,,,,,,,,	15509.5	13060	11463	16449.5	13240	13822.5	14215	0.652401	0.44443	0.227405	0.595957	0.549841	0.743179	1
PM03	A04	Nitrate	N-Source,nitrogen,NO3,,,,Urea cycle,-,-,-,-,-,-,-,-,-,-,-	18645.5	22565	19297.5	22051.5	21460	21281.5	25096	0.204089	0.0849482	0.100852	0.00822962	0.0327789	0.00968524	1
PM03	A05	Urea	N-Source,nitrogen,urea,,,,Urea cycle,Arg,-,-,-,-,-,-,-,-,-,-	27524	25882	23889.5	21740	24847	22870.5	26113.5	0.457301	0.902422	0.487435	0.122771	0.396491	0.183682	1
PM03	A06	Biuret	N-Source,nitrogen,urea,,,,Urea cycle,-,-,-,-,-,-,-,-,-,-,-	13066.5	13473	11426.5	10631	14524	13935	15676	0.549146	0.490344	0.329948	0.284629	0.737642	0.580505	1
PM03	A07	L-Alanine	N-Source,amino acid,amino acid,Ala,AA,,TCA,oxaloacetate,Pyruvate,-,-,-,-,-,-,-,-,-	37463	36509	34392	33156.5	35515.5	31849	36939.5	0.714202	0.772186	0.173684	0.0990188	0.420048	0.089198	1
PM03	A08	L-Arginine	N-Source,amino acid,amino acid,Arg,AA,,TCA,oxologlutarate,glutamate,Arg,-,-,-,-,-,-,-,-	43221	44308.5	32981.5	26948.5	33110	29015.5	39039	0.249421	0.101472	0.126784	0.0182824	0.052749	0.0153693	1
PM03	A09	L-Asparagine	N-Source,amino acid,amino acid,Asn,AA,,TCA,oxaloacetate,Asp,Asn,-,-,-,-,-,-,-,-	44134.5	42632.5	39987	39527	40319	36951.5	41249	0.244262	0.312176	0.459943	0.626482	0.419226	0.0111655	1
PM03	A10	L-Aspartic Acid	N-Source,amino acid,amino acid,Asp,AA,,TCA,oxaloacetate,Asp,-,-,-,-,-,-,-,-,-	46835	48240	42362	39244.5	41618.5	38156	44040.5	0.118778	0.0480005	0.399928	0.0229234	0.258742	0.0181978	1
PM03	A11	L-Cysteine	N-Source,amino acid,amino acid,Cys,AA,,TCA,oxaloacetate,Pyruvate,gly ser thr metablolism,Cys,-,-,-,	40494	43511.5	33473.5	31526	37270.5	35248	39809.5	0.681942	0.634258	0.0275306	0.0568206	0.127865	0.097604	1
PM03	A12	L-Glutamic Acid	N-Source,amino acid,amino acid,Glu,AA,,TCA,oxologlutarate,Glu,-,-,-,-,-,-,-,-,-	58269	50211	48674	47386	48688.5	47144.5	53626	0.0243432	0.0524658	0.0546479	0.0307049	0.0463774	0.0243152	1
PM03	B01	L-Glutamine	N-Source,amino acid,amino acid,Gln,AA,,TCA,oxologlutarate,glutamate,Gln,-,-,-,-,-,-,-,-	49107	54557	47711.5	40160	48088	40010	47973.5	0.71748	0.155934	0.932921	0.140628	0.963677	0.0560361	1
PM03	B02	Glycine	N-Source,amino acid,amino acid,Gly,AA,,TCA,oxaloacetate,Pyruvate,Gly,-,-,-,-,-,-,-,-	20090.5	27043	20395.5	16534	20631.5	18096.5	22481.5	0.121058	0.165622	0.151912	0.0328054	0.399747	0.0425853	1
PM03	B03	L-Histidine	N-Source,amino acid,amino acid,His,AA,,TCA,oxologlutarate,glutamate,His,-,-,-,-,-,-,-,-	13211	24285	19766.5	10029.5	14007	14878	20165.5	0.0133807	0.113019	0.745281	0.00242928	0.0305453	0.0154819	1
PM03	B04	L-Isoleucine	N-Source,amino acid,amino acid,Ile,AA,,TCA,succinyl CoA,Propionyl CoA,Ile,-,-,-,-,-,-,-,-	14135	19862.5	15704	11713.5	16100	16517.5	20626	0.0457528	0.635463	0.0720418	0.0341983	0.108353	0.179965	1
PM03	B05	L-Leucine	N-Source,amino acid,amino acid,Leu,AA,,TCA,Citrate,acetyl CoA,Leu,-,-,-,-,-,-,-,-	12620.5	18581.5	12996	8899.5	14780	13440.5	18720.5	0.118014	0.924838	0.102613	0.0364392	0.0409379	0.016766	1
PM03	B06	L-Lysine	N-Source,amino acid,amino acid,Lys,AA,,TCA,Citrate,acetyl CoA,Lys,-,-,-,-,-,-,-,-	11439.5	12714	10345.5	8457	13540.5	12087	14022	0.407989	0.333999	0.199588	0.100913	0.780408	0.274915	1
PM03	B07	L-Methionine	N-Source,amino acid,amino acid,Met,AA,,TCA,succinyl CoA,propanoate metabolism,gly ser thr metabloli	11539	15783.5	10087	8139.5	12644.5	12011	16343	0.0535224	0.424802	0.0382364	0.0202673	0.0250355	0.0135856	1
PM03	B08	L-Phenylalanine	N-Source,amino acid,amino acid,Phe,AA,,TCA,Citrate,acetyl CoA,Phe,-,-,-,-,-,-,-,-	13667.5	17068.5	12420	11146	15391	14957.5	19047	0.129482	0.5087	0.091282	0.0667332	0.261919	0.278249	1
PM03	B09	L-Proline	N-Source,amino acid,amino acid,Pro,AA,-,TCA,oxologlutarate,Glu,-,-,-,-,-,-,-,-,-	35344	47065.5	32628	27568	34317	33679.5	40013.5	0.046263	0.0968443	0.0116953	0.00573206	0.161454	0.0270136	1
PM03	B10	L-Serine	N-Source,amino acid,amino acid,Ser,AA,,TCA,oxaloacetate,Pyruvate,-,-,-,-,-,-,-,-,-	13112.5	28927	20979.5	8482	31152	17455	26563	0.0031045	0.0864423	0.149184	0.0127608	0.0210898	0.0199267	1
PM03	B11	L-Threonine	N-Source,amino acid,amino acid,Thr,AA,,TCA,oxaloacetate,Pyruvate,Thr,-,-,-,-,-,-,-,-	27369.5	34907.5	26119.5	22884.5	27775	26717	33478.5	0.149108	0.731709	0.122228	0.0823443	0.23241	0.200938	1
PM03	B12	L-Tryptophan	N-Source,amino acid,amino acid,Trp,AA,,TCA,Citrate,acetyl CoA,Trp,-,-,-,-,-,-,-,-	23582	32696	23459.5	20015.5	24426	26283	33368.5	0.011318	0.677933	0.0107691	0.00651841	0.0116718	0.0407958	1
PM03	C01	L-Tyrosine	N-Source,amino acid,amino acid,Tyr,AA,,TCA,succinate,Tyr,-,-,-,-,-,-,-,-,-	15542	21859.5	24880	13082.5	23403	17622.5	17510	0.450331	0.254927	0.204214	0.038286	0.0515651	0.897618	1
PM03	C02	L-Valine	N-Source,amino acid,amino acid,Val,AA,,TCA,succinyl CoA,Val,-,-,-,-,-,-,-,-,-	11237.5	17140.5	12365.5	8930	13719	12443	16606.5	0.0231101	0.00721025	0.0475771	0.00572292	0.00732796	0.0072875	1
PM03	C03	D-Alanine	N-Source,amino acid,amino acid,Ala-D,AA,,TCA,oxaloacetate,Pyruvate,Ala,-,-,-,-,-,-,-,-	27608.5	36099.5	27132	19301	25122.5	22701.5	32889.5	0.0477952	0.20019	0.023212	0.0414855	0.0339609	0.00954931	1
PM03	C04	D-Asparagine	N-Source,amino acid,amino acid,Asn-D,AA,,TCA,oxaloacetate,Asp,Asn,-,-,-,-,-,-,-,-	13994	18370.5	15423	11933.5	17550.5	20158	21789.5	0.0155534	0.023109	0.00372282	0.00125298	0.00735974	0.129113	1
PM03	C05	D-Aspartic Acid	N-Source,amino acid,amino acid,Asp-D,AA,,TCA,oxaloacetate,Asp,-,-,-,-,-,-,-,-,-	27345	29792	26441.5	16182	27660.5	24360	28233.5	0.704369	0.247563	0.287983	0.00135282	0.478078	0.00989239	1
PM03	C06	D-Glutamic Acid	N-Source,amino acid,amino acid,Glu-D,AA,,TCA,oxologlutarate,Glu,-,-,-,-,-,-,-,-,-	23921.5	34855.5	27367.5	19372	30113	24688.5	24966.5	0.791629	0.101877	0.250514	0.226659	0.106165	0.859231	1
PM03	C07	D-Lysine	N-Source,amino acid,amino acid,Lys-D,AA,,TCA,Citrate,acetyl CoA,Lys,-,-,-,-,-,-,-,-	10660.5	10813.5	9033.5	7737.5	12170.5	10432	13102	0.132025	0.153117	0.066392	0.0347012	0.487349	0.172504	1
PM03	C08	D-Serine	N-Source,amino acid,amino acid,Ser-D,AA,,TCA,oxaloacetate,Pyruvate,-,-,-,-,-,-,-,-,-	7748	6064	5839	5938.5	9306.5	8290.5	10068.5	0.645877	0.454848	0.433235	0.433086	0.885395	0.766468	1
PM03	C09	D-Valine	N-Source,amino acid,amino acid,Val-D,AA,,TCA,succinyl CoA,Val,-,-,-,-,-,-,-,-,-	11671.5	13915	10802	9710.5	13511.5	12534	16907	0.26229	0.451576	0.185244	0.156137	0.446283	0.373084	1
PM03	C10	L-Citrulline	N-Source,amino acid,intermediate,L-Citrulline,AA,,Urea cycle,citrulline,-,-,-,-,-,-,-,-,-,-	23644	23543	17235.5	13099	20464.5	17088.5	23292	0.888244	0.923916	0.0808959	0.0348087	0.193874	0.0277717	1
PM03	C11	L-Homoserine	N-Source,amino acid,intermediate,L-Homoserine,AA,,TCA,oxaloacetate,Pyruvate,gly ser thr metablolism	18940	21674	17085	13187	20513	17644	22519.5	0.219067	0.778782	0.117231	0.0471254	0.482551	0.188935	1
PM03	C12	L-Ornithine	N-Source,amino acid,intermediate,L-Ornithine,AA,,Urea cycle,ornithine,-,-,-,-,-,-,-,-,-,-	48471.5	48003	39007	33106.5	38365	36482.5	44679.5	0.34953	0.370474	0.153599	0.0757748	0.248467	0.12702	1
PM03	D01	N-Acetyl-L-Glutamic Acid	N-Source,amino acid,intermediate,N-Acetyl-D,L-Glutamic Acid,AA,,TCA,oxologlutarate,Glu,-,-,-,-,-,-,	13853	16651	14404	12383	16349.5	14963.5	15388	0.0593644	0.358761	0.158277	0.0393758	0.162265	0.64361	1
PM03	D02	N-Phthaloyl-L-Glutamic Acid	N-Source,amino acid,intermediate,N-Phthaloyl-L-Glutamic Acid,AA,,TCA,oxologlutarate,Glu,-,-,-,-,-,-	9759.5	13552	9508.5	8690.5	11498	9478	12273.5	0.0513403	0.459144	0.0470172	0.0522626	0.289101	0.0513718	1
PM03	D03	L-Pyroglutamic Acid	N-Source,amino acid,intermediate,5-Oxo-L-proline,AA,,TCA,oxologlutarate,Glu,-,-,-,-,-,-,-,-,-	25572	32613	24667.5	20837.5	26806.5	20596.5	26793	0.587588	0.208312	0.350919	0.252596	0.995511	0.106131	1
PM03	D04	Hydroxylamine	N-Source,amine,NH3,,,,-,-,-,-,-,-,-,-,-,-,-,-	7881.5	12780.5	9123.5	7110	11992	9327.5	13281.5	0.0384114	0.786047	0.0574572	0.0467297	0.468793	0.128035	1
PM03	D05	Methylamine	N-Source,amine,1 carbon,,,,-,-,-,-,-,-,-,-,-,-,-,-	7095	9229	7439.5	4979	11637	8240.5	11163.5	0.0143406	0.0241158	0.0320163	0.00761797	0.519984	0.0217669	1
PM03	D06	N-Amylamine	N-Source,amine,5 carbon,,,,-,-,-,-,-,-,-,-,-,-,-,-	9485	12201	8872.5	7130	12216	11664	14407.5	0.162635	0.460362	0.129786	0.120372	0.486411	0.411953	1
PM03	D07	N-Butylamine	N-Source,amine,4 carbon,,,,-,-,-,-,-,-,-,-,-,-,-,-	9374.5	11603	8926	7069	11858	10829	13021.5	0.310292	0.661012	0.247944	0.166295	0.727648	0.529937	1
PM03	D08	Ethylamine	N-Source,amine,2 carbon,,,,-,-,-,-,-,-,-,-,-,-,-,-	10425.5	11977	9242.5	8474	12211	11252	15126.5	0.12662	0.304096	0.0869138	0.0767391	0.31034	0.287243	1
PM03	D09	Ethanolamine	N-Source,amine,2 carbon,,,,TCA,Citrate,acetyl CoA,-,-,-,-,-,-,-,-,-	11811.5	12353.5	10909	9608	13616.5	12294.5	14941	0.502293	0.588924	0.394674	0.291381	0.784716	0.606875	1
PM03	D10	Ethylenediamine	N-Source,,,,,,,,,,,,,,,,,	12774	23433.5	13361.5	10851	18029	16977	28256	0.0491849	0.345786	0.0481461	0.038655	0.119526	0.108345	1
PM03	D11	Putrescine	N-Source,amino acid,intermediate,Putrescine,AA,,TCA,oxologlutarate,glutamate,Arg,-,-,-,-,-,-,-,-	11781.5	12473.5	10948.5	10030.5	13877	12974	14818	0.142964	0.250373	0.0987734	0.0655604	0.619548	0.383018	1
PM03	D12	Agmatine	N-Source,amino acid,intermediate,Agmatine,AA,,TCA,oxologlutarate,glutamate,Arg,-,-,-,-,-,-,-,-	18650	19288	17861	17273	20520.5	19932.5	20574	0.50354	0.647682	0.340618	0.29962	0.986593	0.839336	1
PM03	E01	Histamine	N-Source,amino acid,intermediate,Histamine,AA,,TCA,oxologlutarate,glutamate,His,-,-,-,-,-,-,-,-	13437	14091.5	13595	11069.5	15476.5	14835.5	14353.5	0.429298	0.798961	0.473699	0.0733787	0.442235	0.740399	1
PM03	E02	b-Phenylethylamine	N-Source,amino acid,intermediate,b-Phenylethylamine,AA,,TCA,Citrate,acetyl CoA,Phe,-,-,-,-,-,-,-,-	8700.5	11275.5	9885.5	7199	10946.5	9513.5	10443	0.220541	0.548337	0.660132	0.155222	0.796838	0.581992	1
PM03	E03	Tyramine	N-Source,amino acid,intermediate,Tyramine,AA,,TCA,succinate,tyr metabolism,-,-,-,-,-,-,-,-,-	8391	10456.5	8675	6476	11234.5	9686.5	11627.5	0.314574	0.679284	0.335915	0.179828	0.89957	0.594162	1
PM03	E04	Acetamide	N-Source,amide,2 carbon,,,,-,-,-,-,-,-,-,-,-,-,-,-	8467	11295	9321.5	6938.5	11405	9788	12218.5	0.116872	0.594811	0.178309	0.0623338	0.663138	0.309735	1
PM03	E05	Formamide	N-Source,amide,1 carbon,,,,-,-,-,-,-,-,-,-,-,-,-,-	8625.5	13912	10081	6162.5	12576	9091.5	11875.5	0.344261	0.525416	0.588253	0.199047	0.846482	0.464351	1
PM03	E06	Glucuronamide	N-Source,carbohydrate,hexose,glucose,amide,,Glycolosis,glucose,-,-,-,-,-,-,-,-,-,-	15678	19731.5	14181.5	13957.5	17049.5	16473.5	20972	0.0932429	0.746089	0.060818	0.227368	0.21514	0.119863	1
PM03	E07	D,L-Lactamide	N-Source,amide,3 carbon,,,,-,-,-,-,-,-,-,-,-,-,-,-	9776	13068	10399	7645	13467.5	11600.5	14227.5	0.398341	0.808173	0.440967	0.287573	0.882598	0.666777	1
PM03	E08	D-Glucosamine	N-Source,carbohydrate,hexose,glucose,amine,,Glycolosis,glucose,-,-,-,-,-,-,-,-,-,-	10684	23916.5	23976.5	9453.5	27179.5	12255	15979.5	0.322174	0.364813	0.177619	0.247808	0.159215	0.487069	1
PM03	E09	D-Galactosamine	N-Source,carbohydrate,hexose,galactose,amine,,Galactose Metabolism,-,-,-,-,-,-,-,-,-,-,-	14006.5	21886.5	17795.5	12887.5	20925	15348	20092	0.116781	0.508242	0.508562	0.0883106	0.786925	0.220879	1
PM03	E10	D-Mannosamine	N-Source,carbohydrate,hexose,mannose,amine,,Glycolosis,fructose,mannose,-,-,-,-,-,-,-,-,-	22818.5	32029.5	26110.5	20566	28374.5	24515.5	31365.5	0.143541	0.85077	0.285535	0.104075	0.529284	0.243692	1
PM03	E11	N-Acetyl-D-Glucosamine	N-Source,carbohydrate,hexose,glucose,amine,,Glycolosis,glucose,Glycosaminoglycan degradation,-,-,-,	13739.5	29041.5	20484.5	11919	18851	18875.5	30046	0.052791	0.84658	0.124952	0.0448582	0.119078	0.0965878	1
PM03	E12	N-Acetyl-D-Galactosamine	N-Source,carbohydrate,hexose,galactose,amine,,Galactose Metabolism,-,-,-,-,-,-,-,-,-,-,-	16307	17193.5	15611	15089	17613	16746.5	18148.5	0.139758	0.244527	0.0460036	0.037273	0.453274	0.218507	1
PM03	F01	N-Acetyl-D-Mannosamine	N-Source,carbohydrate,hexose,mannose,amine,,Glycolosis,fructose,mannose,-,-,-,-,-,-,-,-,-	13891.5	17052.5	15642.5	13384.5	16597.5	16203	16406	0.262146	0.761786	0.66032	0.234815	0.933739	0.926728	1
PM03	F02	Adenine	N-Source,nucleic acid,purine,adenine,,,Purine Metabolism,-,-,-,-,-,-,-,-,-,-,-	14415.5	20852	16130	15894	16083.5	14030.5	17775.5	0.132933	0.243637	0.185426	0.317298	0.500999	0.0730331	1
PM03	F03	Adenosine	N-Source,nucleoside,purine,adenine,,,Purine Metabolism,-,-,-,-,-,-,-,-,-,-,-	14193	21058.5	14806.5	9951.5	16670	13311.5	17523.5	0.467777	0.502984	0.406223	0.171735	0.847124	0.331127	1
PM03	F04	Cytidine	N-Source,nucleoside,pyrimidine,cytosine,sulfur,,Pyrimidine Metabolism,-,-,-,-,-,-,-,-,-,-,-	21394	32702	24749.5	16898	26778.5	21174	30640	0.0712224	0.664248	0.181516	0.0439159	0.408871	0.0758004	1
PM03	F05	Cytosine	N-Source,nucleic acid,pyrimidine,cytosine,,,Pyrimidine Metabolism,-,-,-,-,-,-,-,-,-,-,-	7898	11923.5	9217.5	6787	11010	9395	11783.5	0.422543	0.973426	0.527368	0.329867	0.864042	0.596483	1
PM03	F06	Guanine	N-Source,nucleic acid,purine,guanine,,,Purine Metabolism,-,-,-,-,-,-,-,-,-,-,-	12571.5	22250	19109.5	17169	15199	16228.5	19369	0.169688	0.613229	0.97152	0.719039	0.432408	0.45195	1
PM03	F07	Guanosine	N-Source,nucleoside,purine,guanine,,,Purine Metabolism,-,-,-,-,-,-,-,-,-,-,-	15530	23510	16396	13101.5	20032.5	16506	22672.5	0.186323	0.856361	0.209191	0.149976	0.626858	0.323059	1
PM03	F08	Thymine	N-Source,nucleic acid,pyrimidine,thymine,,,Pyrimidine Metabolism,-,-,-,-,-,-,-,-,-,-,-	9751	13660.5	10926.5	8978	12998	11383	14387.5	0.408402	0.883154	0.515568	0.334405	0.791454	0.577137	1
PM03	F09	Thymidine	N-Source,nucleoside,pyrimidine,thymine,,,Pyrimidine Metabolism,-,-,-,-,-,-,-,-,-,-,-	10827	15557	12294.5	9668	15209.5	12197	15008.5	0.383838	0.885119	0.513535	0.280491	0.962233	0.552629	1
PM03	F10	Uracil	N-Source,nucleic acid,pyrimidine,uracil,,,Pyrimidine Metabolism,-,-,-,-,-,-,-,-,-,-,-	12086.5	15408	12865.5	11293	15401.5	14077.5	16459	0.372464	0.807796	0.411965	0.301831	0.80867	0.644823	1
PM03	F11	Uridine	N-Source,nucleoside,pyrimidine,uracil,,,Pyrimidine Metabolism,-,-,-,-,-,-,-,-,-,-,-	13123	16074.5	13050.5	12532.5	16334.5	14054	16581.5	0.365471	0.872673	0.305738	0.290824	0.943919	0.511084	1
PM03	F12	Inosine	N-Source,nucleoside,purine,hypoxanthine,,,Purine Metabolism,-,-,-,-,-,-,-,-,-,-,-	17107.5	19195.5	16663.5	16328.5	19269.5	17625	19733.5	0.0301871	0.370003	0.0241914	0.0208995	0.596586	0.0716699	1
PM03	G01	Xanthine	N-Source,nucleic acid,purine,xanthine,,,Purine Metabolism,-,-,-,-,-,-,-,-,-,-,-	32848.5	40382.5	41821.5	23120	42641.5	30894.5	26181	0.523184	0.0558531	0.0166961	0.380691	0.0165723	0.317223	1
PM03	G02	Xanthosine	N-Source,nucleoside,purine,xanthine,,,Purine Metabolism,-,-,-,-,-,-,-,-,-,-,-	8923	16193	12947	9468	14547.5	12733	13329.5	0.229183	0.375501	0.861331	0.285351	0.706029	0.805513	1
PM03	G03	Uric Acid	N-Source,nucleic acid,purine,uric acid,,,Purine Metabolism,-,-,-,-,-,-,-,-,-,-,-	14086.5	15851.5	12339	10708.5	13303.5	12947	14735.5	0.843482	0.839529	0.577328	0.425745	0.759167	0.675171	1
PM03	G04	Alloxan	N-Source,nucleic acid,intermediate,,,,-,-,-,-,-,-,-,-,-,-,-,-	24627.5	36061.5	31794.5	24200	33930	28798.5	32575.5	0.221172	0.394128	0.843782	0.169049	0.781523	0.467274	1
PM03	G05	Allantoin	N-Source,nucleic acid,intermediate,,,,-,-,-,-,-,-,-,-,-,-,-,-	21343.5	24955.5	20904.5	16048.5	20647.5	18799	23588.5	0.710246	0.805426	0.612422	0.2962	0.627294	0.443764	1
PM03	G06	Parabanic Acid	N-Source,urea,3 carbon,,,,-,-,-,-,-,-,-,-,-,-,-,-	10015.5	15140	9910.5	7487.5	12826	10710	13602.5	0.549811	0.801576	0.499826	0.383623	0.900204	0.624837	1
PM03	G07	D,L-a-Amino-N-Butyric Acid	N-Source,amino acid,4 carbon,D,L-a-Amino-N-Butyric Acid,AA,,-,-,-,-,-,-,-,-,-,-,-,-	12464.5	18790	13645	8344	16363	12452	18211	0.264648	0.865433	0.28458	0.119006	0.675362	0.289248	1
PM03	G08	g-Amino-N-Butyric Acid	N-Source,carboxylate,4 carbon,,,,TCA,oxologlutarate,Glu,-,-,-,-,-,-,-,-,-	25971	37033.5	24518	19954.5	22820.5	23169	30780.5	0.266719	0.23838	0.184656	0.093017	0.156621	0.172382	1
PM03	G09	e-Amino-N-Caproic Acid	N-Source,carboxylate,6 carbon,-,,,-,-,-,-,-,-,-,-,-,-,-,-	10594	16425	13996.5	9947	15354	14212	14800.5	0.409055	0.743821	0.857505	0.352946	0.90359	0.8981	1
PM03	G10	D,L-a-Amino-Caprylic Acid	N-Source,amino acid,8 carbon,D,L-a-Amino- Caprylic Acid,AA,,-,-,-,-,-,-,-,-,-,-,-,-	13692.5	26229	28410.5	10819	34653	15201	15239	0.622102	0.23053	0.102864	0.337751	0.0273331	0.991956	1
PM03	G11	d-Amino-N-Valeric Acid	N-Source,amino acid,intermediate,d-Amino-N-Valeric Acid,AA,,TCA,Citrate,acetyl CoA,Leu,-,-,-,-,-,-,	16398.5	22574	17813.5	14724.5	19454	18036	21397.5	0.245659	0.758998	0.376232	0.186608	0.635149	0.445046	1
PM03	G12	a-Amino-N-Valeric Acid	N-Source,amino acid,5 carbon,Leu,AA,,TCA,Citrate,acetyl CoA,Leu,-,-,-,-,-,-,-,-	18820	25034.5	20450	18482.5	21153.5	23441	25215	0.0873605	0.933204	0.100833	0.0844178	0.196222	0.509284	1
PM03	H01	Ala-Asp	N-Source,amino acid,dipeptide,Ala,Asp,,TCA,oxaloacetate,Pyruvate,Ala,-,-,TCA,oxaloacetate,Asp,-,-,-	16750	49097	38871.5	36591	39088	41752	49395	0.0177661	0.971489	0.121278	0.0965028	0.102127	0.19738	1
PM03	H02	Ala-Gln	N-Source,amino acid,dipeptide,Ala,Gln,,TCA,oxaloacetate,Pyruvate,Ala,-,-,TCA,oxaloglutarate,glutama	19126	48856.5	42164	32611.5	43171	35412.5	43910	0.0386233	0.424193	0.727383	0.169892	0.900339	0.217903	1
PM03	H03	Ala-Glu	N-Source,amino acid,dipeptide,Ala,Glu,,TCA,oxaloacetate,Pyruvate,Ala,-,-,TCA,oxaloglutarate,Glu,-,-	14772.5	50442.5	42014	35350	41266.5	40277.5	46006	0.0237706	0.59104	0.440146	0.137343	0.477539	0.372485	1
PM03	H04	Ala-Gly	N-Source,amino acid,dipeptide,Ala,Gly,,TCA,oxaloacetate,Pyruvate,Ala,-,-,TCA,oxaloacetate,Pyruvate,	17108.5	41728	36052	26587	34252	29785	36497	0.0713485	0.423339	0.936175	0.201536	0.741448	0.330303	1
PM03	H05	Ala-His	N-Source,amino acid,dipeptide,Ala,His,,TCA,oxaloacetate,Pyruvate,Ala,-,-,TCA,oxaloglutarate,glutama	34216.5	46261.5	35385.5	23368.5	32003.5	29284.5	40388	0.400759	0.39416	0.479457	0.111566	0.308703	0.21657	1
PM03	H06	Ala-Leu	N-Source,amino acid,dipeptide,Ala,Leu,,TCA,oxaloacetate,Pyruvate,Ala,-,-,TCA,Citrate,acetyl CoA,Leu	15341	34515.5	29537.5	21297.5	31014	27082.5	33304.5	0.127447	0.860773	0.586311	0.283017	0.785644	0.493967	1
PM03	H07	Ala-Thr	N-Source,amino acid,dipeptide,Ala,Thr,,TCA,oxaloacetate,Pyruvate,Ala,-,-,TCA,oxaloacetate,Pyruvate,	16753.5	43238.5	35801	26385.5	37100.5	33534	36227.5	0.0612941	0.324873	0.938839	0.213216	0.897296	0.685748	1
PM03	H08	Gly-Asn	N-Source,amino acid,dipeptide,Gly-3,Asn,,TCA,oxaloacetate,Pyruvate,Gly,-,-,TCA,oxaloacetate,Asp,Asn	19686.5	48110	37200.5	30537.5	38954	33138.5	44160	0.056086	0.565522	0.327457	0.175204	0.509987	0.228469	1
PM03	H09	Gly-Gln	N-Source,amino acid,dipeptide,Gly,Gln,,TCA,oxaloacetate,Pyruvate,Gly,-,-,TCA,oxaloglutarate,glutama	19234	52772	44614	29664.5	48411.5	36924	46178	0.0334317	0.310249	0.763684	0.0913719	0.690621	0.202226	1
PM03	H10	Gly-Glu	N-Source,amino acid,dipeptide,Gly,Glu,,TCA,oxaloacetate,Pyruvate,Gly,-,-,TCA,oxaloglutarate,Glu,-,-	15559.5	51564.5	37740	29554	41542.5	34006	45411.5	0.0405114	0.476744	0.283451	0.128771	0.632236	0.208868	1
PM03	H11	Gly-Met	N-Source,amino acid,dipeptide,Gly,Met,,TCA,oxaloacetate,Pyruvate,Gly,-,-,TCA,succinyl CoA,propanoat	19530.5	31175.5	27167	22066	30454.5	28390.5	35892	0.11391	0.576622	0.247732	0.141937	0.464374	0.348045	1
PM03	H12	Met-Ala	N-Source,amino acid,dipeptide,Met,Ala,,TCA,succinyl CoA,propanoate metabolism,gly ser thr metabloli	35138.5	45003.5	35646.5	36086	39886.5	39883	45333.5	0.192525	0.967012	0.219087	0.253446	0.448195	0.449119	1
PM04	A01	Background	P-Source,Background,,,,,-,-,-,-,-,-,-,-,-,-,-,-	17364.5	25632	24134.5	16663.5	22965	20890	19077.5	0.662686	0.112425	0.541667	0.504745	0.19938	0.523582	1
PM04	A02	Phosphate	P-Source,phosphate,,,,,-,-,-,-,-,-,-,-,-,-,-,-	24037.5	30406	27306	24433.5	27786	24132	25241	0.821416	0.167417	0.534687	0.837117	0.300785	0.733541	1
PM04	A03	Pyrophosphate	P-Source,phosphate,,,,,-,-,-,-,-,-,-,-,-,-,-,-	14447	28973.5	26316	22306	27850	25134.5	25953.5	0.075134	0.306749	0.915341	0.265092	0.490474	0.785168	1
PM04	A04	Trimetaphosphate	P-Source,phosphate,,,,,-,-,-,-,-,-,-,-,-,-,-,-	12802.5	32520	27609.5	21751.5	29087	23209	24302	0.107745	0.0458079	0.375211	0.388968	0.0805623	0.716392	1
PM04	A05	Tripolyphosphate	P-Source,phosphate,,,,,-,-,-,-,-,-,-,-,-,-,-,-	10622	19066	19118.5	20305.5	20539	21344	23712	0.0511283	0.495545	0.366865	0.416044	0.280028	0.408057	1
PM04	A06	Triethyl Phosphate	P-Source,phosphate,,,,,-,-,-,-,-,-,-,-,-,-,-,-	11830.5	22462	17909.5	11070.5	19535.5	14475.5	14097	0.662011	0.162801	0.569031	0.552783	0.218718	0.92958	1
PM04	A07	Hypophosphite	P-Source,phosphate,,-,,,-,-,-,-,-,-,-,-,-,-,-,-	12875.5	22924.5	19557	12224.5	22619.5	15243	14362	0.422074	0.00915385	0.220961	0.129574	0.00355754	0.420159	1
PM04	A08	Adenosine 2'-Monophosphate	P-Source,nucleotide,purine,adenine,Phosphate,,Purine Metabolism,-,-,-,-,-,-,-,-,-,-,-	29701.5	38438.5	33287.5	26514.5	34580	28824	29013	0.866349	0.0237813	0.290058	0.292573	0.0518465	0.926392	1
PM04	A09	Adenosine 3'-Monophosphate	P-Source,nucleotide,purine,adenine,Phosphate,,Purine Metabolism,-,-,-,-,-,-,-,-,-,-,-	27873.5	38768.5	33394	27055.5	34743	29399.5	29868.5	0.486336	0.0155534	0.258422	0.0230916	0.0596245	0.728425	1
PM04	A10	Adenosine 5'-Monophosphate	P-Source,nucleotide,purine,adenine,Phosphate,,Purine Metabolism,-,-,-,-,-,-,-,-,-,-,-	26259.5	37756	23737.5	24152	33771.5	28602.5	21804	0.590348	0.122757	0.892539	0.74641	0.191581	0.405823	1
PM04	A11	Adenosine 2',3'-Cyclic Monophosphate	P-Source,nucleotide,purine,adenine,Phosphate,,Purine Metabolism,-,-,-,-,-,-,-,-,-,-,-	30776.5	41162	36376.5	33397	39274.5	32597	31731.5	0.791937	0.00198508	0.249116	0.419958	0.00748981	0.49972	1
PM04	A12	Adenosine 3',5'-Cyclic Monophosphate	P-Source,nucleotide,purine,adenine,Phosphate,,Purine Metabolism,-,-,-,-,-,-,-,-,-,-,-	27713	38224	28482.5	23465.5	31556.5	27806.5	31283	0.232758	0.109619	0.579114	0.0678662	0.890425	0.203614	1
PM04	B01	Thiophosphate	P-Source,-,-,-,,,-,-,-,-,-,-,-,-,-,-,-,-	30307	33497.5	30284.5	31087.5	28871	33191.5	33246	0.641734	0.707725	0.135469	0.0259701	0.053579	0.964444	1
PM04	B02	Dithiophosphate	P-Source,,,,,,-,-,-,-,-,-,-,-,-,-,-,-	26483.5	38145	34570	26739.5	35221	33629	34937.5	0.333761	0.120792	0.799426	0.0206502	0.946372	0.406188	1
PM04	B03	D,L-a-Glycerol Phosphate	P-Source,carbohydrate,3 carbon,glycerol,Phosphate,,Glycolosis,G3P,-,-,-,-,-,-,-,-,-,-	21870.5	32543	26803	19280.5	27628	21597	24221.5	0.403553	0.0105765	0.155004	0.00707887	0.0895507	0.00180495	1
PM04	B04	b-Glycerol Phosphate	P-Source,carbohydrate,3 carbon,glycerol,Phosphate,,Glycolosis,G3P,-,-,-,-,-,-,-,-,-,-	23754	36103.5	28049.5	19080.5	30807	24958	27113	0.324752	0.00476505	0.489443	0.00842883	0.0921387	0.0284702	1
PM04	B05	Carbamyl Phosphate	P-Source,carbohydrate,3 carbon,glycerol,Phosphate,,Glycolosis,G3P,-,-,-,-,-,-,-,-,-,-	18513.5	29548.5	24438	16634.5	25981.5	20663	21541.5	0.615265	0.0599701	0.440066	0.182008	0.152522	0.778363	1
PM04	B06	D-2-Phospho-Glyceric Acid	P-Source,carbohydrate,3 carbon,glycerol,Phosphate,,Glycolosis,G3P,-,-,-,-,-,-,-,-,-,-	24193	35579	27189	18451	29585.5	24973	25943.5	0.711242	0.0417595	0.74215	0.0862835	0.200148	0.682972	1
PM04	B07	D-3-Phospho-Glyceric Acid	P-Source,carbohydrate,3 carbon,glycerol,Phosphate,,Glycolosis,G3P,-,-,-,-,-,-,-,-,-,-	15849.5	33844.5	25747.5	19054.5	27192	21010.5	23760.5	0.229731	0.0131196	0.443481	0.0437122	0.0864235	0.141483	1
PM04	B08	Guanosine 2'-Monophosphate	P-Source,nucleotide,purine,guanine,Phosphate,,Purine Metabolism,-,-,-,-,-,-,-,-,-,-,-	24087.5	38802.5	30953	18199.5	32106.5	26152	27797	0.205079	0.0358793	0.122755	0.00806264	0.0739769	0.274397	1
PM04	B09	Guanosine 3'-Monophosphate	P-Source,nucleotide,purine,guanine,Phosphate,,Purine Metabolism,-,-,-,-,-,-,-,-,-,-,-	25462.5	43159.5	34957	21903.5	35094.5	26461.5	29108.5	0.219069	0.00739131	0.113501	0.100839	0.0155616	0.019637	1
PM04	B10	Guanosine 5'-Monophosphate	P-Source,nucleotide,purine,guanine,Phosphate,,Purine Metabolism,-,-,-,-,-,-,-,-,-,-,-	25817	39300.5	31532.5	22987	33575.5	27851.5	30272.5	0.248538	0.0128105	0.487816	0.048009	0.0845908	0.143064	1
PM04	B11	Guanosine 2',3'-Cyclic Monophosphate	P-Source,nucleotide,purine,guanine,Phosphate,,Purine Metabolism,-,-,-,-,-,-,-,-,-,-,-	22597	36738.5	27370.5	25126	29798	24801	25990	0.161484	0.0672034	0.470654	0.638222	0.289085	0.663532	1
PM04	B12	Guanosine 3',5'-Cyclic Monophosphate	P-Source,nucleotide,purine,guanine,Phosphate,,Purine Metabolism,-,-,-,-,-,-,-,-,-,-,-	24438.5	31675	24947.5	23677.5	27753	23605.5	25585	0.662274	0.0850366	0.841798	0.415189	0.420778	0.399645	1
PM04	C01	Phosphoenol Pyruvate	P-Source,carbohydrate,3 carbon,pyruvate,,,Glycolosis,pyruvate,-,-,-,-,-,-,-,-,-,-	29469.5	34983	29365.5	26265	31583	28484	28732.5	0.772908	0.0125708	0.722016	0.231935	0.120263	0.806413	1
PM04	C02	Phospho-Glycolic Acid	P-Source,carbohydrate,2 carbon,g3p,,,Glycolosis,G3P,-,-,-,-,-,-,-,-,-,-	20105.5	31433	26276.5	16135	25322.5	19050	22374	0.331082	0.0202566	0.126052	0.0462894	0.159337	0.126893	1
PM04	C03	D-Glucose-1-Phosphate	P-Source,carbohydrate,hexose,glucose,phosphate,,Glycolosis,glucose,-,-,-,-,-,-,-,-,-,-	24396	22187.5	24819.5	16890	30532.5	23629.5	27887	0.304326	0.670816	0.0463597	0.00345427	0.157174	0.00475119	1
PM04	C04	D-Glucose-6-Phosphate	P-Source,carbohydrate,hexose,glucose,phosphate,,Glycolosis,glucose,-,-,-,-,-,-,-,-,-,-	26236	32155.5	14367.5	18293	21245.5	25166	29444	0.343189	0.539282	0.0538932	0.00329126	0.518974	0.0252981	1
PM04	C05	2-Deoxy-D-Glucose 6-Phosphate	P-Source,carbohydrate,hexose,glucose,phosphate,,Glycolosis,glucose,-,-,-,-,-,-,-,-,-,-	21343	29024.5	25904.5	16835.5	27415	22790	24356	0.440444	0.105699	0.553139	0.050036	0.23185	0.449061	1
PM04	C06	D-Glucosamine-6-Phosphate	P-Source,carbohydrate,hexose,glucose,phosphate,,Glycolosis,glucose,-,-,-,-,-,-,-,-,-,-	24270	41908.5	30955	16592.5	29669.5	24426.5	31082	0.128488	0.0620914	0.949541	0.00932284	0.515528	0.04304	1
PM04	C07	6-Phospho-Gluconic Acid	P-Source,carbohydrate,hexose,glucose,phosphate,,Glycolosis,glucose,-,-,-,-,-,-,-,-,-,-	23971	39725	29785	17158	32127.5	25013.5	29748.5	0.332165	0.0506859	0.989515	0.0245133	0.412907	0.143604	1
PM04	C08	Cytidine 2'-Monophosphate	P-Source,nucleotide,pyrimidine,cytosine,Phosphate,,Pyrimidine Metabolism,-,-,-,-,-,-,-,-,-,-,-	26448.5	40733	33162	23573	33800	26417	29529	0.137584	0.028783	0.0012068	0.0104296	0.260854	0.232681	1
PM04	C09	Cytidine 3'-Monophosphate	P-Source,nucleotide,pyrimidine,cytosine,Phosphate,,Pyrimidine Metabolism,-,-,-,-,-,-,-,-,-,-,-	17912.5	39377.5	31156.5	13734.5	32334.5	27528.5	30856.5	0.208174	0.0334687	0.336025	0.0412142	0.613252	0.100883	1
PM04	C10	Cytidine 5'-Monophosphate	P-Source,nucleotide,pyrimidine,cytosine,Phosphate,,Pyrimidine Metabolism,-,-,-,-,-,-,-,-,-,-,-	25947.5	36143	31252.5	21063	32294.5	26655.5	28465.5	0.407475	0.00447951	0.295748	0.129975	0.0236857	0.0585057	1
PM04	C11	Cytidine 2',3'-Cyclic Monophosphate	P-Source,nucleotide,pyrimidine,cytosine,Phosphate,,Pyrimidine Metabolism,-,-,-,-,-,-,-,-,-,-,-	24098.5	35840	29456	22649	32040	26119.5	27546	0.114699	0.0662783	0.102804	0.252013	0.172589	0.308786	1
PM04	C12	Cytidine 3',5'-Cyclic Monophosphate	P-Source,nucleotide,pyrimidine,cytosine,Phosphate,,Pyrimidine Metabolism,-,-,-,-,-,-,-,-,-,-,-	23620	32142	25831	22734.5	28562.5	24192.5	24420	0.757827	0.0997878	0.586388	0.796521	0.309599	0.94458	1
PM04	D01	D-Mannose-1-Phosphate	P-Source,carbohydrate,hexose,mannose,Phosphate,,Glycolosis,fructose,mannose,-,-,-,-,-,-,-,-,-	28377	32932	17009.5	27932	22428.5	28706	28125.5	0.940867	0.353975	0.504969	0.937489	0.542528	0.794401	1
PM04	D02	D-Mannose-6-Phosphate	P-Source,carbohydrate,hexose,mannose,Phosphate,,Glycolosis,fructose,mannose,-,-,-,-,-,-,-,-,-	23446	20196	26071.5	18306.5	20942.5	22652	27448.5	0.233442	0.545198	0.787074	0.00157998	0.596556	0.00526984	1
PM04	D03	Cysteamine-S-Phosphate	P-Source,amine,2 carbon,,,,-,-,-,-,-,-,-,-,-,-,-,-	29057	46098.5	39863	18623	44688.5	27486	32822.5	0.744535	0.0177306	0.0361898	0.00106936	0.0619687	0.0384777	1
PM04	D04	Phospho-L-Arginine	P-Source,amino acid,amino acid,Phospho-L-Arginine,AA,,TCA,oxologlutarate,glutamate,Arg,Phosphate,-,	17072	30601.5	26414	13969	26489.5	20154.5	23391	0.171794	0.0140686	0.0949727	0.000549639	0.0562233	0.0257694	1
PM04	D05	O-Phospho-D-Serine	P-Source,amino acid,amino acid,O-Phospho-D-Serine,AA,,TCA,oxaloacetate,Pyruvate,Ser,Phosphate,-,-,-	14727.5	25405	19839.5	9631.5	21944.5	15076	17650	0.421713	0.0742581	0.323644	0.053556	0.181436	0.254592	1
PM04	D06	O-Phospho-L-Serine	P-Source,amino acid,amino acid,O-Phospho-L-Serine,AA,,TCA,oxaloacetate,Pyruvate,Ser,Phosphate,-,-,-	27606	39174	37631.5	21767.5	31655.5	17956	28245	0.808979	0.0213263	0.297365	0.00884802	0.207693	0.321819	1
PM04	D07	O-Phospho-L-Threonine	P-Source,amino acid,amino acid,O-Phospho-L-Threonine,AA,,TCA,oxaloacetate,Pyruvate,Thr,Phosphate,-,	19600	36554	26565.5	12632.5	29374	22354.5	26203	0.273488	0.0673837	0.513715	0.00460446	0.200318	0.117774	1
PM04	D08	Uridine 2'-Monophosphate	P-Source,nucleotide,pyrimidine,uracil,Phosphate,,Pyrimidine Metabolism,-,-,-,-,-,-,-,-,-,-,-	24725.5	36479.5	32232.5	17496	21292	22108.5	28195.5	0.284977	0.0252295	0.278969	0.011557	0.470382	0.250922	1
PM04	D09	Uridine 3'-Monophosphate	P-Source,nucleotide,pyrimidine,uracil,Phosphate,,Pyrimidine Metabolism,-,-,-,-,-,-,-,-,-,-,-	25433	37758.5	23322	19994.5	32024	26787	29523	0.143034	0.105716	0.543551	0.0794112	0.530553	0.421869	1
PM04	D10	Uridine 5'-Monophosphate	P-Source,nucleotide,pyrimidine,uracil,Phosphate,,Pyrimidine Metabolism,-,-,-,-,-,-,-,-,-,-,-	26281	30513	28241	20039	31886	25467.5	28359.5	0.397134	0.605122	0.965926	0.0192953	0.223075	0.0883021	1
PM04	D11	Uridine 2',3'-Cyclic Monophosphate	P-Source,nucleotide,pyrimidine,uracil,Phosphate,,Pyrimidine Metabolism,-,-,-,-,-,-,-,-,-,-,-	24785	35192.5	29196.5	25147	31631.5	26626	30219.5	0.0868432	0.024126	0.273318	0.0756777	0.41093	0.0419869	1
PM04	D12	Uridine 3',5'-Cyclic Monophosphate	P-Source,nucleotide,pyrimidine,uracil,Phosphate,,Pyrimidine Metabolism,-,-,-,-,-,-,-,-,-,-,-	24338.5	34463	25017.5	23149	27659	25301.5	26594	0.308122	0.0406025	0.398456	0.149271	0.753302	0.669705	1
PM04	E01	O-Phospho-D-Tyrosine	P-Source,amino acid,amino acid,O-Phospho-D-Tyrosine,AA,,TCA,succinate,tyr metabolism,phosphate,-,-,	24859.5	23306	27472	26125	27775.5	13504	17611.5	0.213525	0.525208	0.132969	0.187292	0.134715	0.404014	1
PM04	E02	O-Phospho-L-Tyrosine	P-Source,amino acid,amino acid,O-Phospho-L-Tyrosine,AA,,TCA,succinate,tyr metabolism,phosphate,-,-,	17812	22437.5	21139.5	12942	19763	15359	15924	0.387204	0.272007	0.0762273	0.198901	0.412734	0.748574	1
PM04	E03	Phosphocreatine	P-Source,amino acid,intermediate,Phosphocreatine,AA,,TCA,oxologlutarate,glutamate,Arg,-,-,-,-,-,-,-	12368	25792	22439	13663.5	24029	19310	21056	0.0967242	0.155557	0.12646	0.00448371	0.302582	0.0727755	1
PM04	E04	Phosphoryl Choline	P-Source,carbohydrate,3 carbon,glycerol,Phosphate,,Glycolosis,G3P,-,-,-,-,-,-,-,-,-,-	22168.5	31568.5	27003	20594.5	30059.5	23870.5	25464	0.151565	0.0952919	0.188796	0.189751	0.0870795	0.120957	1
PM04	E05	O-Phosphoryl-Ethanolamine	P-Source,amine,2 carbon,,,,TCA,Citrate,acetyl CoA,-,-,-,-,-,-,-,-,-	20101	30184.5	24435	14154	16597	20739	24088.5	0.0539202	0.0977307	0.632358	0.00505298	0.466221	0.114274	1
PM04	E06	Phosphono Acetic Acid	P-Source,carboxylate,2 carbon,,,,Glycolosis,acetate,-,-,-,-,-,-,-,-,-,-	6132	14523.5	13023.5	8012.5	13242	9626	12603.5	0.000277753	0.0697256	0.757548	0.0138599	0.873719	0.0345478	1
PM04	E07	2-Aminoethyl Phosphonic Acid	P-Source,alcohol,2 carbon,,,,-,-,-,-,-,-,-,-,-,-,-,-	10213	19549	14070.5	8624.5	17103	12324.5	15855	0.00252386	0.187525	0.170139	0.0205423	0.7323	0.326015	1
PM04	E08	Methylene Diphosphonic Acid	P-Source,,,,,,-,-,-,-,-,-,-,-,-,-,-,-	7064.5	18210.5	13158	7787.5	14810	11261	14262.5	0.117809	0.315739	0.715076	0.155225	0.861899	0.437909	1
PM04	E09	Thymidine 3'-Monophosphate	P-Source,nucleotide,pyrimidine,thymine,Phosphate,,Pyrimidine Metabolism,-,-,-,-,-,-,-,-,-,-,-	22930	33520	26968.5	17473.5	28517.5	23981	26487	0.0389281	0.0286262	0.072247	0.000354712	0.275064	0.0326311	1
PM04	E10	Thymidine 5'-Monophosphate	P-Source,nucleotide,pyrimidine,thymine,Phosphate,,Pyrimidine Metabolism,-,-,-,-,-,-,-,-,-,-,-	24967.5	38924.5	30729.5	18516	32195.5	25196.5	30388.5	0.0299945	0.0314987	0.295794	0.000623364	0.562979	0.154619	1
PM04	E11	Inositol Hexaphosphate	P-Source,-,-,-,,,-,-,-,-,-,-,-,-,-,-,-,-	10531.5	26209	20113	13609	21140.5	16515.5	20195	0.00649391	0.0224607	0.931205	0.0170933	0.820157	0.156066	1
PM04	E12	Thymidine 3',5'-Cyclic Monophosphate	P-Source,nucleotide,pyrimidine,thymine,Phosphate,,Pyrimidine Metabolism,-,-,-,-,-,-,-,-,-,-,-	23224	31305	23272.5	25027	25400.5	23496.5	26557.5	0.0481383	0.0102736	0.222777	0.103747	0.375298	0.0413298	1
PM04	F01	Background	S-Source,Background,,,,,-,-,-,-,-,-,-,-,-,-,-,-	23169.5	28349.5	24679	20972	26542	22284	21470.5	0.301444	0.0147102	0.0445099	0.575279	0.138952	0.216018	1
PM04	F02	Sulfate	S-Source,-,-,-,,,-,-,-,-,-,-,-,-,-,-,-,-	20052.5	29343.5	23907	18109.5	25274	18464.5	20555	0.801169	0.00551749	0.0250818	0.00418615	0.0301121	0.0166063	1
PM04	F03	Thiosulfate	S-Source,-,-,-,,,-,-,-,-,-,-,-,-,-,-,-,-	23866	39581.5	33637	21821.5	33853.5	24183.5	27380.5	0.243481	0.0170801	0.0829257	0.0880166	0.136835	0.0227658	1
PM04	F04	Tetrathionate	S-Source,-,-,-,,,-,-,-,-,-,-,-,-,-,-,-,-	21043	35333.5	26138.5	15037.5	28373.5	21425	25984	0.119979	0.0233011	0.836042	0.00952847	0.0513525	0.0334284	1
PM04	F05	Thiophosphate	S-Source,-,-,-,,,-,-,-,-,-,-,-,-,-,-,-,-	20633	30928	25938	18680	26527	19627	22538.5	0.310011	0.0704077	0.173841	0.02389	0.325306	0.161781	1
PM04	F06	Dithiophosphate	S-Source,,,,,,-,-,-,-,-,-,-,-,-,-,-,-	20735	32187.5	26785.5	16184.5	27847	20969.5	23083	0.218682	0.0437717	0.107327	0.0270302	0.213715	0.384669	1
PM04	F07	L-Cysteine	S-Source,amino acid,amino acid,Cys,AA,,TCA,oxaloacetate,Pyruvate,gly ser thr metablolism,Cys,-,-,-,	22100.5	36425.5	29643.5	18868.5	31001	23471.5	26064.5	0.0911495	0.0429433	0.078018	0.0476537	0.23312	0.396511	1
PM04	F08	D-Cysteine	S-Source,amino acid,amino acid,Cys-D,AA,,TCA,oxaloacetate,Pyruvate,gly ser thr metablolism,Cys,-,-,	20229	28576	22441.5	13577.5	23802.5	18799.5	20753.5	0.765724	0.0485309	0.235424	0.00466751	0.417661	0.432884	1
PM04	F09	Cys-Gly	S-Source,amino acid,dipeptide,Cys,Gly,,TCA,oxaloacetate,Pyruvate,gly ser thr metablolism,Cys,-,TCA,	19846.5	32712.5	28565.5	18237.5	26040	21434.5	24083.5	0.130907	0.0376813	0.0888256	0.100549	0.487418	0.140856	1
PM04	F10	L-Cysteic Acid	S-Source,amino acid,intermediate,L-Cysteic Acid,AA,,TCA,oxaloacetate,Pyruvate,gly ser thr metabloli	19667.5	28928	22387.5	8359	23099.5	18962.5	20504.5	0.582605	0.00584916	0.000924489	0.215823	0.401555	0.453192	1
PM04	F11	Cysteamine	S-Source,-,-,-,,,-,-,-,-,-,-,-,-,-,-,-,-	31832	37010	28420	18768	31062	23534	27947.5	0.0978393	0.0112301	0.581065	0.00577714	0.172123	0.0649375	1
PM04	F12	L-Cysteine Sulfinic Acid	S-Source,amino acid,intermediate,L-Cysteine Sulfinic Acid,AA,,TCA,oxaloacetate,Pyruvate,gly ser thr	25888	33419.5	28675	24923.5	25958.5	27694	28119.5	0.566176	0.0304924	0.613149	0.0223026	0.0241645	0.285179	1
PM04	G01	N-Acetyl-L-Cysteine	S-Source,amino acid,amino acid,Cys,AA,,TCA,oxaloacetate,Pyruvate,gly ser thr metablolism,Cys,-,-,-,	24503	29669	26313.5	23177	27140.5	23662	24003	0.756533	0.127922	0.203878	0.60792	0.330698	0.835607	1
PM04	G02	S-Methyl-L-Cysteine	S-Source,amino acid,amino acid,Cys,AA,,TCA,oxaloacetate,Pyruvate,gly ser thr metablolism,Cys,-,-,-,	19306.5	27153.5	21940.5	16269	23483.5	18307.5	18566	0.663004	0.051342	0.174668	0.424744	0.18434	0.899414	1
PM04	G03	Cystathionine	S-Source,-,-,-,,,-,-,-,-,-,-,-,-,-,-,-,-	17505.5	29332.5	24151.5	15255	24880.5	17486	20034	0.248546	0.128726	0.201634	0.280294	0.300237	0.397216	1
PM04	G04	Lanthionine	S-Source,-,-,-,Cys,,-,-,-,-,-,-,-,-,-,-,-,-	19623.5	28210.5	22537.5	15928.5	23858	17785	19770.5	0.933066	0.0921311	0.240108	0.336187	0.274736	0.312247	1
PM04	G05	Glutathione	S-Source,,,,,,-,-,-,-,-,-,-,-,-,-,-,-	18945.5	30042.5	25820	15543.5	24797.5	20272	20030.5	0.649646	0.11279	0.22675	0.297387	0.384923	0.942075	1
PM04	G06	D,L-Ethionine	S-Source,-,-,-,,,-,-,-,-,-,-,-,-,-,-,-,-	12522	21274.5	16084	11575.5	17939	12812.5	15427.5	0.197943	0.0752786	0.801912	0.218493	0.607427	0.5354	1
PM04	G07	L-Methionine	S-Source,amino acid,amino acid,Met,AA,,TCA,succinyl CoA,propanoate metabolism,gly ser thr metabloli	19410	30812	25352.5	17059.5	25620.5	19114	22312.5	0.257987	0.0671045	0.240655	0.209572	0.424168	0.23802	1
PM04	G08	D-Methionine	S-Source,amino acid,amino acid,Met-D,AA,,TCA,succinyl CoA,propanoate metabolism,gly ser thr metablo	19715	30057.5	24981.5	15693.5	25431.5	20572.5	22456	0.290718	0.0765165	0.265659	0.0991413	0.46715	0.571098	1
PM04	G09	Gly-Met	S-Source,amino acid,dipeptide,Gly,Met,,TCA,oxaloacetate,Pyruvate,Gly,-,-,TCA,succinyl CoA,propanoat	21223	33102.5	27150	18196.5	28215	22178	24049	0.266026	0.0784473	0.100182	0.132561	0.30877	0.391385	1
PM04	G10	N-Acetyl-D,L-Methionine	S-Source,-,-,-,,,-,-,-,-,-,-,-,-,-,-,-,-	19224.5	32124	27454.5	17024	26677.5	20276	24479	0.0265061	0.0599848	0.0640497	0.0195326	0.488034	0.0995485	1
PM04	G11	L-Methionine Sulfoxide	S-Source,amino acid,amino acid,Met,AA,,TCA,succinyl CoA,propanoate metabolism,-,-,-,-,-,-,-,-,-	22395.5	32861.5	26314.5	20898.5	28395	23114.5	24671.5	0.263717	0.0284445	0.236184	0.114529	0.295242	0.51967	1
PM04	G12	L-Methionine Sulfone	S-Source,amino acid,amino acid,Met,AA,,TCA,succinyl CoA,propanoate metabolism,-,-,-,-,-,-,-,-,-	22743	29763	24127	22155.5	27110	23836.5	24978.5	0.28698	0.05886	0.300492	0.0328508	0.328511	0.196267	1
PM04	H01	L-Djenkolic Acid	S-Source,amino acid,intermediate,L-Djenkolic Acid,AA,,TCA,oxaloacetate,Pyruvate,gly ser thr metablo	23950.5	27414	25560	22672	26303	25175	23917	0.993523	0.543269	0.675807	0.833058	0.688505	0.799731	1
PM04	H02	Thiourea	S-Source,,,,,,-,-,-,-,-,-,-,-,-,-,-,-	23286.5	28496	25978	21071.5	26766	21839.5	22860.5	0.885117	0.356188	0.457426	0.688789	0.445234	0.81193	1
PM04	H03	1-Thio-b-D-Glucose	S-Source,carbohydrate,hexose,glucose,sulfur,,Glycolosis,glucose,-,-,-,-,-,-,-,-,-,-	21692	33735.5	31829.5	18702	32173.5	19830	20578.5	0.754199	0.0773169	0.0931183	0.687078	0.131273	0.877145	1
PM04	H04	D,L-Lipoamide	S-Source,,,,,,-,-,-,-,-,-,-,-,-,-,-,-	24838	34716	29957.5	26149.5	30779	23901	24142	0.845576	0.153274	0.338378	0.732706	0.346289	0.965329	1
PM04	H05	Taurocholic Acid	S-Source,-,-,-,,,-,-,-,-,-,-,-,-,-,-,-,-	21040.5	30261	23810	19545	26190.5	20017	21557	0.911862	0.287481	0.721083	0.710783	0.517686	0.803692	1
PM04	H06	Taurine	S-Source,-,-,-,,,-,-,-,-,-,-,-,-,-,-,-,-	20444	28724.5	24825.5	18377.5	25711	19937.5	19943	0.929953	0.277705	0.474726	0.817046	0.476389	0.99936	1
PM04	H07	Hypotaurine	S-Source,-,-,-,,,-,-,-,-,-,-,-,-,-,-,-,-	21531.5	33791	29832	23178	25388	24583	25271.5	0.277401	0.160446	0.378812	0.663529	0.981739	0.888227	1
PM04	H08	p-Aminobenzene Sulfonic Acid	S-Source,-,-,-,,,-,-,-,-,-,-,-,-,-,-,-,-	21990	29942	25730.5	20935.5	26479	22148.5	22397	0.915576	0.206473	0.48738	0.754646	0.504897	0.962385	1
PM04	H09	Butane Sulfonic Acid	S-Source,-,-,-,,,-,-,-,-,-,-,-,-,-,-,-,-	22278.5	32670.5	26686	20554.5	27513	22596	24092	0.53946	0.185931	0.474598	0.472403	0.49191	0.728969	1
PM04	H10	2-Hydroxyethane Sulfonic Acid	S-Source,alcohol,2 carbon,,,,-,-,-,-,-,-,-,-,-,-,-,-	21659.5	31789	26810.5	21225	28103	22740	23281	0.702429	0.245156	0.538162	0.652896	0.446303	0.911516	1
PM04	H11	Methane Sulfonic Acid	S-Source,-,-,-,-,,-,-,-,-,-,-,-,-,-,-,-,-	25486.5	33076.5	27279.5	22845.5	29785	25807.5	26486.5	0.787981	0.235851	0.869235	0.346583	0.520053	0.888967	1
PM04	H12	Tetramethylene Sulfone	S-Source,,,,,,-,-,-,-,-,-,-,-,-,-,-,-	27235.5	32134	26965.5	24933.5	29831.5	26331	27335.5	0.965519	0.307592	0.928441	0.437294	0.501168	0.762901	1
PM05	A01	Background	Nutritional suppliment,Background,,,,,-,-,-,-,-,-,-,-,-,-,-,-	24968	27225.5	27571.5	26758	27190	26951.5	29309.5	0.363602	0.53958	0.619696	0.50823	0.561895	0.510178	1
PM05	A02	Positive Control	Nutritional suppliment,Positive Control,,,,,-,-,-,-,-,-,-,-,-,-,-,-	29633.5	31611	32074	33629.5	33275	30806	35520	0.176829	0.371345	0.357473	0.733189	0.579113	0.264436	1
PM05	A03	L-Alanine	Nutritional suppliment,amino acid,amino acid,Ala,AA,,TCA,oxaloacetate,Pyruvate,-,-,-,-,-,-,-,-,-	20369	25953.5	26157	23918.5	25109	21269.5	25325.5	0.330125	0.824422	0.759741	0.594693	0.954437	0.271865	1
PM05	A04	L-Arginine	Nutritional suppliment,amino acid,amino acid,Arg,AA,,TCA,oxologlutarate,glutamate,Arg,-,-,-,-,-,-,-	21748	27113	27857	23368	26890	21829	26222.5	0.455126	0.794784	0.617448	0.358085	0.870612	0.340036	1
PM05	A05	L-Asparagine	Nutritional suppliment,amino acid,amino acid,Asn,AA,,TCA,oxaloacetate,Asp,Asn,-,-,-,-,-,-,-,-	19350.5	25863	26176.5	22402	24971.5	20337	24567.5	0.354732	0.743205	0.678635	0.564075	0.933067	0.376384	1
PM05	A06	L-Aspartic Acid	Nutritional suppliment,amino acid,amino acid,Asp,AA,,TCA,oxaloacetate,Asp,-,-,-,-,-,-,-,-,-	20948.5	26181	27058	22709	25931.5	21027.5	25872.5	0.536334	0.952864	0.825611	0.587061	0.992336	0.407879	1
PM05	A07	L-Cysteine	Nutritional suppliment,amino acid,amino acid,Cys,AA,,TCA,oxaloacetate,Pyruvate,gly ser thr metablol	23626.5	28656	29862	25253.5	28454	22802.5	28815	0.19401	0.918279	0.541535	0.121055	0.885809	0.058614	1
PM05	A08	L-Glutamic Acid	Nutritional suppliment,amino acid,amino acid,Glu,AA,,TCA,oxologlutarate,Glu,-,-,-,-,-,-,-,-,-	27422	28033	30320	24650	28098.5	22668	28119.5	0.83271	0.979402	0.52809	0.37906	0.996462	0.242291	1
PM05	A09	Adenosine 3',5'-Cyclic Monophosphate	Nutritional suppliment,nucleotide,purine,adenine,Phosphate,,Purine Metabolism,-,-,-,-,-,-,-,-,-,-,-	22277	28110.5	28969	24528.5	27528	22962.5	27708	0.315042	0.893721	0.697155	0.335301	0.966515	0.217863	1
PM05	A10	Adenine	Nutritional suppliment,nucleic acid,purine,adenine,,,Purine Metabolism,-,-,-,-,-,-,-,-,-,-,-	21995.5	27639	28638	24681	27536.5	22014.5	27607.5	0.3767	0.993753	0.804353	0.433785	0.989649	0.281067	1
PM05	A11	Adenosine	Nutritional suppliment,nucleoside,purine,adenine,,,Purine Metabolism,-,-,-,-,-,-,-,-,-,-,-	27037	30757.5	33477.5	27726.5	32727.5	25729	32015	0.441655	0.759269	0.718018	0.379558	0.89231	0.208922	1
PM05	A12	2'-Deoxyadenosine	Nutritional suppliment,nucleoside,purine,adenine,,,Purine Metabolism,-,-,-,-,-,-,-,-,-,-,-	28023	29351	31538	29204.5	31841.5	29157.5	33629	0.366822	0.329379	0.631377	0.279387	0.750988	0.234716	1
PM05	B01	L-Glutamine	Nutritional suppliment,amino acid,amino acid,Gln,AA,,TCA,oxologlutarate,glutamate,Gln,-,-,-,-,-,-,-	23478	28336.5	28563.5	24633	27167	24305	27833.5	0.161439	0.364379	0.18302	0.0804445	0.647074	0.0852494	1
PM05	B02	Glycine	Nutritional suppliment,,,,,,,,,,,,,,,,,	17100	23518	22725	17709	22185	18561	22386	0.0549799	0.134103	0.647142	0.0381252	0.671555	0.0188576	1
PM05	B03	L-Histidine	Nutritional suppliment,amino acid,amino acid,His,AA,,TCA,oxologlutarate,glutamate,His,-,-,-,-,-,-,-	14758.5	22477	21231	15710.5	19848.5	16626	21227	0.0662022	0.0729186	0.991706	0.020848	0.101172	0.0369841	1
PM05	B04	L-Isoleucine	Nutritional suppliment,amino acid,amino acid,Ile,AA,,TCA,succinyl CoA,Propionyl CoA,Ile,-,-,-,-,-,-	19305.5	26845.5	26248	19486	24809	20051.5	25735.5	0.103046	0.333437	0.625446	0.0148511	0.546462	0.0492936	1
PM05	B05	L-Leucine	Nutritional suppliment,amino acid,amino acid,Leu,AA,,TCA,Citrate,acetyl CoA,Leu,-,-,-,-,-,-,-,-	17681.5	25085	24980.5	18432.5	23036.5	18451.5	24004	0.248201	0.70455	0.684623	0.128017	0.760592	0.238018	1
PM05	B06	L-Lysine	Nutritional suppliment,amino acid,amino acid,Lys,AA,,TCA,Citrate,acetyl CoA,Lys,-,-,-,-,-,-,-,-	18518.5	26005.5	25647.5	18289	24468	19361.5	24470.5	0.331312	0.630494	0.680447	0.105243	0.999515	0.214686	1
PM05	B07	L-Methionine	Nutritional suppliment,amino acid,amino acid,Met,AA,,TCA,succinyl CoA,propanoate metabolism,gly ser	17894.5	25834	26303.5	17588	24387.5	19442.5	24886	0.187643	0.60294	0.524636	0.0397598	0.852718	0.151248	1
PM05	B08	L-Phenylalanine	Nutritional suppliment,amino acid,amino acid,Phe,AA,,TCA,Citrate,acetyl CoA,Phe,-,-,-,-,-,-,-,-	19534	27339.5	25834	18865.5	24575.5	19010	25635.5	0.0511321	0.281339	0.873162	0.0059925	0.100014	0.00358803	1
PM05	B09	Guanosine 3',5'-Cyclic Monophosphate	Nutritional suppliment,nucleotide,purine,guanine,Phosphate,,Purine Metabolism,-,-,-,-,-,-,-,-,-,-,-	20278	27317.5	27183.5	20464.5	25853	20719.5	25757	0.2453	0.493994	0.521717	0.10418	0.972511	0.127512	1
PM05	B10	Guanine	Nutritional suppliment,nucleic acid,purine,guanine,,,Purine Metabolism,-,-,-,-,-,-,-,-,-,-,-	21435	28295	28223	19361	26238.5	22771	26630	0.218482	0.387858	0.3193	0.0329808	0.886562	0.11472	1
PM05	B11	Guanosine	Nutritional suppliment,nucleoside,purine,guanine,,,Purine Metabolism,-,-,-,-,-,-,-,-,-,-,-	21789.5	28595.5	27670	23079	27727	21806.5	26996	0.0613416	0.61064	0.770498	0.149413	0.63281	0.0591581	1
PM05	B12	2'-Deoxyguanosine	Nutritional suppliment,nucleoside,purine,guanine,,,Purine Metabolism,,,,,,,,,,,	25843.5	30039	29311	27806.5	29418.5	26401	31109	0.0983899	0.274104	0.0990082	0.179443	0.360696	0.0173425	1
PM05	C01	L-Proline	Nutritional suppliment,amino acid,amino acid,Pro,AA,-,TCA,oxologlutarate,Glu,-,-,-,-,-,-,-,-,-	21083	25598	25627.5	23187	24543	22609	25566	0.183908	0.975092	0.964836	0.176912	0.547693	0.168557	1
PM05	C02	L-Serine	Nutritional suppliment,amino acid,amino acid,Ser,AA,,TCA,oxaloacetate,Pyruvate,-,-,-,-,-,-,-,-,-	16349	23524.5	22509	17098	21960.5	17479.5	22146.5	0.119604	0.116948	0.545695	0.0512422	0.843291	0.062842	1
PM05	C03	L-Threonine	Nutritional suppliment,amino acid,amino acid,Thr,AA,,TCA,oxaloacetate,Pyruvate,Thr,-,-,-,-,-,-,-,-	14981.5	23793.5	22884	16179	20500.5	16630	21757.5	0.0468025	0.0221773	0.226892	0.00274059	0.226357	0.0353003	1
PM05	C04	L-Tryptophan	Nutritional suppliment,amino acid,amino acid,Trp,AA,,TCA,Citrate,acetyl CoA,Trp,-,-,-,-,-,-,-,-	16380	25346	24262.5	15699	22364.5	17906.5	24122.5	0.0929239	0.26642	0.896776	0.00829195	0.362816	0.04559	1
PM05	C05	L-Tyrosine	Nutritional suppliment,amino acid,amino acid,Tyr,AA,,TCA,succinate,Tyr,-,-,-,-,-,-,-,-,-	15084	23195	22938.5	15715.5	21154.5	15259.5	22245	0.119651	0.642758	0.698224	0.103519	0.589804	0.0927993	1
PM05	C06	L-Valine	Nutritional suppliment,amino acid,amino acid,Val,AA,,TCA,succinyl CoA,Val,-,-,-,-,-,-,-,-,-	16289.5	26899	24163.5	15314	23075	17254.5	24018.5	0.060932	0.0840448	0.884121	0.0104854	0.433872	0.0375527	1
PM05	C07	L-Isoleucine + L-Valine	Nutritional suppliment,,,,,,,,,,,,,,,,,	18005	27231	24902.5	16177	23832.5	18820	25689.5	0.103996	0.443883	0.688214	0.0268396	0.45536	0.0922402	1
PM05	C08	Hydroxy-L-Proline	Nutritional suppliment,amino acid,intermediate,Hydroxy-L-Proline,AA,,TCA,oxologlutarate,glutamate,g	17984.5	26258	25198	17091.5	24038.5	19885	25580.5	0.00310518	0.666645	0.80763	0.0432794	0.0494463	0.000888131	1
PM05	C09	(5) 4-Amino-Imidazole-4(5)-Carboxamide	Nutritional suppliment,Imidazole,-,-,,,Purine Metabolism,-,-,-,-,-,-,-,-,-,-,-	18436.5	25903	27640	18952.5	25366.5	22173	27168	0.00165299	0.185988	0.788212	0.0136794	0.0525029	0.011765	1
PM05	C10	Hypoxanthine	Nutritional suppliment,nucleic acid,purine,hypoxanthine,,,Purine Metabolism,,,,,,,,,,,	19064.5	26734.5	26920	19287	24910.5	20468.5	18359.5	0.948677	0.467421	0.459148	0.930587	0.563447	0.843688	1
PM05	C11	Inosine	Nutritional suppliment,nucleoside,purine,hypoxanthine,,,Purine Metabolism,-,-,-,-,-,-,-,-,-,-,-	19715	26487	26415	20769	26014	20552.5	25501	0.0229303	0.475435	0.510498	0.0162876	0.345558	0.0025714	1
PM05	C12	2'-Deoxyinosine	Nutritional suppliment,nucleoside,purine,hypoxanthine,,,Purine Metabolism,,,,,,,,,,,	23577	29268.5	29518.5	25287	28814.5	25860	29945.5	0.00348542	0.710857	0.817791	0.0453849	0.204312	0.0779561	1
PM05	D01	L-Ornithine	Nutritional suppliment,amino acid,intermediate,L-Ornithine,AA,,Urea cycle,ornithine,-,-,-,-,-,-,-,-	22817.5	26595.5	26495	24474.5	25482	23160.5	26498	0.141077	0.86205	0.974735	0.320204	0.301651	0.0210471	1
PM05	D02	L-Citrulline	Nutritional suppliment,amino acid,intermediate,L-Citrulline,AA,,Urea cycle,citrulline,-,-,-,-,-,-,-	16341	23692.5	21578.5	16475	21150	17638.5	21757	0.0823797	0.0793937	0.795229	0.00849426	0.695196	0.034269	1
PM05	D03	Chorismic Acid	Nutritional suppliment,,,,,,,,,,,,,,,,,	17113.5	23988.5	22351.5	16781	21773	17192	22643	0.0211797	0.440825	0.83894	0.167891	0.0974395	0.00546067	1
PM05	D04	(-)Shikimic Acid	Nutritional suppliment,,,,,,,,,,,,,,,,,	15705.5	25472	22899.5	15641	21324	17193	23303.5	0.0139253	0.0283524	0.471476	0.0516166	0.0174392	0.00776554	1
PM05	D05	L-Homoserine Lactone	Nutritional suppliment,,,,,,,,,,,,,,,,,	16952	25861.5	24126	13237	21818.5	18250.5	23584.5	0.0581721	0.104503	0.668898	0.00584826	0.362795	0.0910318	1
PM05	D06	D-Alanine	Nutritional suppliment,amino acid,amino acid,Ala-D,AA,,TCA,oxaloacetate,Pyruvate,Ala,-,-,-,-,-,-,-,	16639	25779.5	24587	16981.5	23223.5	19454	24846.5	0.0396433	0.637649	0.763392	0.0818195	0.0890532	0.00723708	1
PM05	D07	D-Aspartic Acid	Nutritional suppliment,amino acid,amino acid,Asp-D,AA,,TCA,oxaloacetate,Asp,-,-,-,-,-,-,-,-,-	16288.5	27235.5	23472	15637	22667.5	17829	24448	0.0133622	0.167392	0.489374	0.0325773	0.101408	0.0122879	1
PM05	D08	D-Glutamic Acid	Nutritional suppliment,amino acid,amino acid,Glu-D,AA,,TCA,oxologlutarate,Glu,-,-,-,-,-,-,-,-,-	16990	26856.5	25197	15395	23706	18580.5	24817.5	0.0714638	0.114269	0.781369	0.0138428	0.434317	0.0509608	1
PM05	D09	D,L-Diamino-Pimelic Acid	Nutritional suppliment,,,,,,,,,,,,,,,,,	18069	27400	26418	17832	24947	20088.5	25656.5	0.00728919	0.249106	0.765699	0.0663983	0.393642	0.0153117	1
PM05	D10	Cytosine	Nutritional suppliment,nucleic acid,pyrimidine,cytosine,,,Pyrimidine Metabolism,-,-,-,-,-,-,-,-,-,-	17729.5	27077.5	25744.5	18729.5	24395.5	20107.5	25219	0.00815486	0.0780613	0.70625	0.00538545	0.144819	0.00516136	1
PM05	D11	Cytidine	Nutritional suppliment,nucleoside,pyrimidine,cytosine,sulfur,,Pyrimidine Metabolism,-,-,-,-,-,-,-,-	19046	27151.5	25830.5	19665	25824.5	20884	24805	0.0651531	0.059813	0.229366	0.0174139	0.403548	0.0272565	1
PM05	D12	2O-Deoxycytidine	Nutritional suppliment,nucleoside,pyrimidine,cytosine,,,Pyrimidine Metabolism,,,,,,,,,,,	25299	30308.5	30044	27408.5	28934.5	26274	30155.5	0.00214466	0.900414	0.951518	0.374993	0.0957813	0.10342	1
PM05	E01	Putrescine	Nutritional suppliment,amino acid,intermediate,Putrescine,AA,,TCA,oxologlutarate,glutamate,Arg,-,-,	21047	25353.5	25297.5	22977.5	24257	22582.5	25900.5	0.0306225	0.281061	0.513851	0.0227039	0.0656807	0.0147706	1
PM05	E02	Spermidine	Nutritional suppliment,,,,,,,,,,,,,,,,,	15685.5	23612	21865.5	18224.5	21009.5	16695	21361	0.0134527	0.134422	0.689334	0.25992	0.652352	0.0198396	1
PM05	E03	Spermine	Nutritional suppliment,,,,,,,,,,,,,,,,,	16014.5	24436.5	22155	14919	21295	17240.5	22412.5	0.0167909	0.0904513	0.775348	0.0139001	0.163595	0.0127086	1
PM05	E04	Pyridoxine	Nutritional suppliment,,,,,,,,,,,,,,,,,	15271	24594	22828	14445.5	21223.5	17105.5	23159.5	0.0258036	0.00422628	0.698319	0.0168376	0.00799063	0.0146643	1
PM05	E05	Pyridoxal	Nutritional suppliment,,,,,,,,,,,,,,,,,	14416	24011	22300	12522	20792	16379.5	22200	0.00924282	0.338178	0.920992	0.0217855	0.282323	0.013323	1
PM05	E06	Pyridoxamine	Nutritional suppliment,,,,,,,,,,,,,,,,,	15964.5	27460	24252	15651.5	23071.5	18311	24278	0.0370831	0.0523329	0.948099	0.0661866	0.183749	0.0238697	1
PM05	E07	b-Alanine	Nutritional suppliment,amino acid,amino acid,Ala-b,AA,,TCA,Citrate,acetyl CoA,,,,,oxaloglutarate,Py	16669.5	27199.5	24143	16166.5	23178	18256	25028.5	0.0208059	0.38456	0.670004	0.106269	0.318056	0.0332826	1
PM05	E08	D-Pantothenic Acid	Nutritional suppliment,,,,,,,,,,,,,,,,,	15587	25878.5	23434	16451	22858.5	18212	23969.5	0.0159736	0.272082	0.737634	0.17034	0.296106	0.0298703	1
PM05	E09	Orotic Acid	Nutritional suppliment,nucleic acid,pyrimidine,intermediate,,,Pyrimidine Metabolism,-,-,-,-,-,-,-,-	18256.5	27313	26079	17355.5	24976.5	21211.5	25961.5	0.0173392	0.141836	0.895277	0.0190914	0.283637	0.0224534	1
PM05	E10	Uracil	Nutritional suppliment,nucleic acid,pyrimidine,uracil,,,Pyrimidine Metabolism,-,-,-,-,-,-,-,-,-,-,-	18556.5	27494.5	27007.5	19145.5	24904	20355.5	25999	0.0100171	0.237783	0.661089	0.158868	0.396841	0.0232788	1
PM05	E11	Uridine	Nutritional suppliment,nucleoside,pyrimidine,uracil,,,Pyrimidine Metabolism,-,-,-,-,-,-,-,-,-,-,-	18864.5	27837.5	25896.5	19471.5	25424.5	20309	24612	0.0147144	0.0772006	0.646542	0.0200232	0.225068	0.00733318	1
PM05	E12	2'-Deoxyuridine	Nutritional suppliment,nucleoside,pyrimidine,uracil,,,Pyrimidine Metabolism,,,,,,,,,,,	23905	29335.5	28007	24841.5	27847.5	26335	29277.5	0.129693	0.96159	0.367815	0.0538417	0.399646	0.138363	1
PM05	F01	Quinolinic Acid	Nutritional suppliment,NAD,intermediate,,,,NAD metabolism,,,,,,,,,,,	22028	24909	25632	24216	24109.5	22810.5	26499.5	0.0390488	0.137746	0.563152	0.490108	0.0644927	0.0416187	1
PM05	F02	Nicotinic Acid	Nutritional suppliment,NAD,intermediate,,,,NAD metabolism,,,,,,,,,,,	16026	24270.5	22990	17777.5	22064.5	17380	22069	0.0141765	0.173554	0.459904	0.0988772	0.995715	0.0238039	1
PM05	F03	Nicotinamide	Nutritional suppliment,NAD,intermediate,,,,NAD metabolism,,,,,,,,,,,	15046.5	23960.5	21728.5	16817.5	21220	16234	22710	0.031917	0.541969	0.665427	0.216089	0.460472	0.0469737	1
PM05	F04	b-Nicotinamide Adenine Dinucleotide	Nutritional suppliment,NAD,,,,,NAD metabolism,,,,,,,,,,,	16363	24494	22683	17247	21528	18011.5	24021.5	0.0109773	0.617801	0.281759	0.0823712	0.0905257	0.0316197	1
PM05	F05	d-Amino-N-Valeric Acid	Nutritional suppliment,amino acid,intermediate,d-Amino-N-Valeric Acid,AA,,TCA,Citrate,acetyl CoA,Le	15443.5	24233.5	22595.5	15849	21591	17898.5	23383	0.0453249	0.710469	0.780669	0.177232	0.470411	0.0917832	1
PM05	F06	Hematin	Nutritional suppliment,chelator,Fe,,,,,,,,,,,,,,,	16385	25329	22933	15836	21867	18284	23690.5	0.0255599	0.422877	0.702198	0.0873282	0.39016	0.0617526	1
PM05	F07	Deferoxamine	Nutritional suppliment,chelator,Fe,,,,,,,,,,,,,,,	20692	27238.5	25474.5	17289	24127	19262	25110	0.0535615	0.354497	0.906466	0.117648	0.558447	0.0292957	1
PM05	F08	a-D-Glucose	Nutritional suppliment,carbohydrate,hexose,glucose,,,Glycolosis,glucose,-,-,-,-,-,-,-,-,-,-	17153.5	25787	25237.5	15610	23118.5	19350.5	25010.5	0.0262419	0.725604	0.92383	0.0553422	0.301007	0.0484628	1
PM05	F09	N-Acetyl-D-Glucosamine	Nutritional suppliment,carbohydrate,hexose,glucose,amine,,Glycolosis,glucose,Glycosaminoglycan degr	17244	26707.5	24450	16855	23291	19325	24667	0.0117931	0.190538	0.904054	0.0412321	0.297114	0.0212429	1
PM05	F10	Thymine	Nutritional suppliment,nucleic acid,pyrimidine,thymine,,,Pyrimidine Metabolism,-,-,-,-,-,-,-,-,-,-,	18385	26692	25112	18381.5	24138.5	20955	25395.5	0.00120029	0.152501	0.848823	0.0526709	0.0350749	0.00426714	1
PM05	F11	Glutathione	Nutritional suppliment,,,,,,-,-,-,-,-,-,-,-,-,-,-,-	21302	26966	26857.5	20090.5	25143.5	21347	24959.5	0.248794	0.00880698	0.247106	0.041607	0.840106	0.00298085	1
PM05	F12	Thymidine	Nutritional suppliment,nucleoside,pyrimidine,thymine,,,Pyrimidine Metabolism,-,-,-,-,-,-,-,-,-,-,-	24296.5	29232.5	28716.5	25966	27809.5	25809	30051.5	0.187434	0.687407	0.523339	0.139394	0.414523	0.144116	1
PM05	G01	Oxaloacetic Acid	Nutritional suppliment,carboxylate,4 carbon,,,,TCA,oxaloacetate,,,,,,,,,,	19387	25477	25481.5	23240	23661	22824	27213	0.0532865	0.415331	0.474185	0.264837	0.210637	0.133057	1
PM05	G02	D-Biotin	Nutritional suppliment,vitamin,,,,,,,,,,,,,,,,	17098	24448	22879.5	19138.5	22471.5	17986.5	22393	0.0332009	0.356434	0.791127	0.131267	0.965194	0.0559867	1
PM05	G03	Cyanocobalamin	Nutritional suppliment,vitamin,,,,,,,,,,,,,,,,	16166.5	24379.5	22776.5	18401.5	22359.5	16924.5	22515	0.0882742	0.534657	0.923756	0.210937	0.955436	0.094584	1
PM05	G04	p-Amino-Benzoic Acid	Nutritional suppliment,vitamin,,,,,,,,,,,,,,,,	16319	25374.5	22643	17865.5	22118.5	17575.5	23253.5	0.0449897	0.408154	0.783159	0.197756	0.546062	0.0634154	1
PM05	G05	Folic Acid	Nutritional suppliment,vitamin,,,,,,,,,,,,,,,,	16417.5	24874	23779.5	16568	22548.5	18561.5	23845	0.109622	0.788427	0.98774	0.19318	0.728306	0.160741	1
PM05	G06	Inosine + Thiamine	Nutritional suppliment,,,,,,,,,,,,,,,,,	17384.5	26836.5	25615.5	17890	23673.5	19122	24745.5	0.0936966	0.642673	0.812927	0.164346	0.741403	0.140732	1
PM05	G07	Thiamine	Nutritional suppliment,,,,,,,,,,,,,,,,,	16841.5	27123.5	24716	18223	22577.5	19288	23806	0.0346504	0.297454	0.777781	0.0589488	0.581463	0.108389	1
PM05	G08	Thiamine Pyrophosphate	Nutritional suppliment,,,,,,,,,,,,,,,,,	18308	26672.5	25418.5	18563.5	23730.5	20385.5	24925.5	0.0173065	0.534076	0.834843	0.0681885	0.416814	0.0930501	1
PM05	G09	Riboflavin	Nutritional suppliment,,,,,,,,,,,,,,,,,	17884	26452	24972	18621.5	23513.5	19441	24874	0.0114397	0.541242	0.977159	0.0301194	0.438055	0.0102858	1
PM05	G10	Pyrrolo-Quinoline Quinone	Nutritional suppliment,,,,,,,,,,,,,,,,,	20944	27076.5	27669.5	21519.5	26497.5	21086	25683	0.00737892	0.473149	0.361348	0.16795	0.445998	0.0162449	1
PM05	G11	Menadione	Nutritional suppliment,,,,,,,,,,,,,,,,,	22311	31552	28475.5	24142.5	27181	25253	33126.5	0.00856361	0.0723875	0.268438	0.125853	0.0131232	0.0262404	1
PM05	G12	m-Inositol	Nutritional suppliment,carbohydrate,hexose,inositol,,,Galactose Metabolism,galactose,-,-,-,-,-,-,-,	23469.5	28414.5	27377	26075.5	26811	25867	28819	0.0290456	0.594261	0.0149492	0.0271874	0.00643915	0.0761544	1
PM05	H01	Butyric Acid	Nutritional suppliment,carboxylate,4 carbon,,,,TCA,oxologlutarate,Butonanate metabolism,-,-,-,-,-,-	21880.5	23310	23666	24501	21870	24346	28261.5	0.277566	0.330595	0.436072	0.53202	0.232085	0.430467	1
PM05	H02	a-Hydroxybutyric Acid	Nutritional suppliment,carboxylate,4 carbon,,,,TCA,oxaloacetate,Pyruvate,gly ser thr metablolism,-,	19957.5	26116	24113.5	22420	22710.5	21467	25939.5	0.245098	0.956911	0.749362	0.535028	0.483626	0.348088	1
PM05	H03	a-Ketobutyric Acid	Nutritional suppliment,carboxylate,4 carbon,,,,Glycine, serine and threonine metabolism,-,-,-,-,-,-	19996	24650	24149	21386	22632.5	20154.5	25328	0.269992	0.871094	0.792476	0.451987	0.555608	0.296433	1
PM05	H04	Caprylic Acid	Nutritional suppliment,carbohydrate,8 carbon,,,,,,,,,,,,,,,	20746	26540.5	26173.5	22493	25103.5	20831	26676.5	0.261404	0.979821	0.927776	0.498193	0.749487	0.295645	1
PM05	H05	D,L-Thioctic acid	Nutritional suppliment,,,,,,,,,,,,,,,,,	19240	26038	24816.5	21266.5	24239.5	19631	25923.5	0.30209	0.983852	0.856881	0.518936	0.772568	0.30965	1
PM05	H06	D,L-Mevalonic Acid Lactone	Nutritional suppliment,,,,,,,,,,,,,,,,,	19239.5	25634.5	25006.5	22189	24003	19864.5	25674	0.335932	0.994695	0.917287	0.716084	0.784213	0.37996	1
PM05	H07	D,L-Carnitine	Nutritional suppliment,carboxylate,7 carbon,,,,TCA,Citrate,acetyl CoA,lysine degadation,-,-,-,-,-,-	19124.5	26062	25391.5	24354	24186	20299.5	25533	0.192992	0.901113	0.973864	0.832277	0.712613	0.254794	1
PM05	H08	Choline	Nutritional suppliment,,,,,,,,,,,,,,,,,	21266.5	27526	27270	23035	25795.5	22704.5	26849	0.210907	0.876236	0.928145	0.582818	0.7817	0.345164	1
PM05	H09	Tween 20	Nutritional suppliment,-,-,-,,,-,-,-,-,-,-,-,-,-,-,-,-	22133.5	27255.5	25754	21211.5	24671.5	22533.5	26690	0.242215	0.860919	0.783451	0.28812	0.533132	0.257274	1
PM05	H10	Tween 40	Nutritional suppliment,-,-,-,,,-,-,-,-,-,-,-,-,-,-,-,-	19592.5	26360	24058	22728	23768.5	21013	25281	0.303891	0.84118	0.815951	0.702608	0.77017	0.397328	1
PM05	H11	Tween 60	Nutritional suppliment,,,,,,,,,,,,,,,,,	22998.5	29837	28372	24678.5	27134.5	25995	28712	0.161479	0.698199	0.921785	0.472822	0.598924	0.458283	1
PM05	H12	Tween 80	Nutritional suppliment,-,-,-,,,-,-,-,-,-,-,-,-,-,-,-,-	24378.5	27499.5	26245.5	28610	25903	26667	31032	0.0960203	0.449579	0.146583	0.653619	0.178682	0.103642	1
PM06	A01	Background	N-Source,Background,,,,,-,-,-,-,-,-,-,-,-,-,-,-	16592	20927	18148	16403	19468	20078	20216.5	0.342923	0.848587	0.491296	0.23927	0.806646	0.955462	1
PM06	A02	L-Glutamine	N-Source,amino acid,amino acid,Gln,AA,,TCA,oxologlutarate,glutamate,Gln,-,-,-,-,-,-,-,-	45395.5	49987	43303	36696	44067	36165	45998	0.675043	0.0935842	0.213433	0.0255847	0.424163	0.0278982	1
PM06	A03	Ala-Ala	N-Source,amino acid,dipeptide,Ala,Ala,,TCA,oxaloacetate,Pyruvate,Ala,-,-,TCA,oxaloglutarate,Pyruvat	16818	37020.5	30673	25166	30670	27944	33218	0.0328969	0.0745523	0.177935	0.0270877	0.19542	0.0403909	1
PM06	A04	Ala-Arg	N-Source,amino acid,dipeptide,Ala,Arg,,TCA,oxaloacetate,Pyruvate,Ala,-,-,TCA,oxaloglutarate,glutama	30171	38838	32553	24012	27845.5	27708	33440.5	0.106372	0.0152259	0.314033	0.00581753	0.0146413	0.0398112	1
PM06	A05	Ala-Asn	N-Source,amino acid,dipeptide,Ala,Asn,,TCA,oxaloacetate,Pyruvate,Ala,-,-,TCA,oxaloacetate,Asp,Asn,-	19071.5	41107.5	33925	28209	34449.5	30197	35794	0.087067	0.143307	0.508786	0.100961	0.636268	0.144144	1
PM06	A06	Ala-Glu	N-Source,amino acid,dipeptide,Ala,Glu,,TCA,oxaloacetate,Pyruvate,Ala,-,-,TCA,oxaloglutarate,Glu,-,-	14772	43084	35041	27509	35751.5	34241	39024.5	0.0314965	0.21502	0.298408	0.0384448	0.362784	0.191258	1
PM06	A07	Ala-Gly	N-Source,amino acid,dipeptide,Ala,Gly,,TCA,oxaloacetate,Pyruvate,Ala,-,-,TCA,oxaloacetate,Pyruvate,	16233	40263.5	32433.5	26599	32229.5	29125.5	34509.5	0.00774299	0.0524061	0.193389	0.00682358	0.0961634	0.0623839	1
PM06	A08	Ala-His	N-Source,amino acid,dipeptide,Ala,His,,TCA,oxaloacetate,Pyruvate,Ala,-,-,TCA,oxaloglutarate,glutama	28096.5	44167	31992.5	25203	30369.5	30076	37254.5	0.19093	0.021114	0.104184	0.0842206	0.0425946	0.0403148	1
PM06	A09	Ala-Leu	N-Source,amino acid,dipeptide,Ala,Leu,,TCA,oxaloacetate,Pyruvate,Ala,-,-,TCA,Citrate,acetyl CoA,Leu	17016.5	35651.5	28643	24485.5	29914.5	27292	31941.5	0.0274733	0.0994548	0.134143	0.024626	0.336909	0.0108596	1
PM06	A10	Ala-Lys	N-Source,amino acid,dipeptide,Ala,Lys,,TCA,oxaloacetate,Pyruvate,Ala,-,-,TCA,Citrate,acetyl CoA,Lys	17539	33825.5	27437.5	22108.5	26090	25312	28332	0.0630211	0.144557	0.79164	0.112397	0.439832	0.33364	1
PM06	A11	Ala-Phe	N-Source,amino acid,dipeptide,Ala,Phe,,TCA,oxaloacetate,Pyruvate,Ala,-,-,TCA,Citrate,acetyl CoA,Phe	26275.5	38100	31062	27919.5	31882.5	29206	31816.5	0.285287	0.00855742	0.626881	0.112486	0.972	0.0461442	1
PM06	A12	Ala-Pro	N-Source,amino acid,dipeptide,Ala,Pro,,TCA,oxaloacetate,Pyruvate,Ala,-,-,TCA,oxaloglutarate,glutama	20179.5	42346.5	34614	32776	36334	37251	47125.5	0.0116124	0.0438512	0.0524387	0.0164711	0.0397479	0.00642254	1
PM06	B01	Ala-Ser	N-Source,amino acid,dipeptide,Ala,Ser,,TCA,oxaloacetate,Pyruvate,Ala,-,-,TCA,oxaloacetate,Pyruvate,	17503	39848.5	33368	28135.5	34698.5	32010.5	38130.5	0.000862136	0.201401	0.00297031	0.0135069	0.0216675	0.0164811	1
PM06	B02	Ala-Thr	N-Source,amino acid,dipeptide,Ala,Thr,,TCA,oxaloacetate,Pyruvate,Ala,-,-,TCA,oxaloacetate,Pyruvate,	11101	33849	26859	20174	28549.5	26579.5	31258.5	0.00206138	0.319501	0.0407716	0.0279058	0.145337	0.124989	1
PM06	B03	Ala-Trp	N-Source,amino acid,dipeptide,Ala,Trp,,TCA,oxaloacetate,Pyruvate,Ala,-,-,TCA,Citrate,acetyl CoA,Trp	13008	32029	23727.5	15034.5	23961.5	21096	30828.5	0.0016147	0.262376	0.0115312	0.0014008	0.0128173	0.00959793	1
PM06	B04	Ala-Tyr	N-Source,amino acid,dipeptide,Ala,Tyr,,TCA,oxaloacetate,Pyruvate,-,-,-,TCA,succinate,Tyr,-,-,-	16790	30135	21601.5	16014.5	21383.5	21775.5	27081	0.0148496	0.0199287	0.00321387	0.00598409	0.022402	0.0821347	1
PM06	B05	Arg-Ala	N-Source,amino acid,dipeptide,Arg,Ala,,TCA,oxologlutarate,glutamate,Arg,-,-,TCA,oxaloglutarate,Pyru	25488	45052	33953.5	26182	33473.5	30067.5	40330.5	0.0121588	0.104067	0.0703012	0.0205633	0.0572966	0.0271339	1
PM06	B06	Arg-Arg	N-Source,amino acid,dipeptide,Arg,Arg,,TCA,oxologlutarate,glutamate,Arg,-,-,TCA,oxaloglutarate,glut	28015.5	34802.5	25043.5	17591	24175	25685	26662.5	0.405672	0.0478723	0.415398	0.0222126	0.292772	0.607647	1
PM06	B07	Arg-Asp	N-Source,amino acid,dipeptide,Arg,Asp,,TCA,oxologlutarate,glutamate,Arg,-,-,TCA,oxaloacetate,Asp,-,	17916	44108	29929	22555.5	29869	29243	38451.5	0.0033378	0.0218213	0.0147438	0.00319744	0.00219929	0.000807195	1
PM06	B08	Arg-Gln	N-Source,amino acid,dipeptide,Arg,Gln,,TCA,oxologlutarate,glutamate,Arg,-,-,TCA,oxaloglutarate,glut	29147.5	48854.5	32883.5	25753.5	35260	31853	44936	0.0460128	0.268671	0.00403333	0.00277326	0.0276171	0.0105654	1
PM06	B09	Arg-Glu	N-Source,amino acid,dipeptide,Arg,Glu,,TCA,oxologlutarate,glutamate,Arg,-,-,TCA,oxaloglutarate,Glu,	18494.5	49261.5	34479.5	26457	36195	33849	43710	0.00083787	0.0223111	0.00839268	0.00112005	0.0201324	0.00518607	1
PM06	B10	Arg-Ile	N-Source,amino acid,dipeptide,Arg,Ile,,TCA,oxologlutarate,glutamate,Arg,-,-,TCA,succinyl CoA,Propio	23443.5	42595	30865.5	23457	31761	30250	37121.5	0.00445042	0.0229675	0.022011	0.00280546	0.0169822	0.0109658	1
PM06	B11	Arg-Leu	N-Source,amino acid,dipeptide,Arg,Leu,,TCA,oxologlutarate,glutamate,Arg,-,-,TCA,Citrate,acetyl CoA,	24850.5	47020	34314.5	29985	35384	32183.5	40301	0.0106661	0.142501	0.0724993	0.000942568	0.124795	0.167165	1
PM06	B12	Arg-Lys	N-Source,amino acid,dipeptide,Arg,Lys,,TCA,oxologlutarate,glutamate,Arg,-,-,TCA,Citrate,acetyl CoA,	22553.5	34291	27426	21443.5	26887.5	28314	32767	0.013162	0.383404	0.0645923	0.0155673	0.0489881	0.0713793	1
PM06	C01	Arg-Met	N-Source,amino acid,dipeptide,Arg,Met,,TCA,oxologlutarate,glutamate,Arg,-,-,TCA,succinyl CoA,propan	29897.5	40654.5	31683.5	28528	34744.5	35674	45594.5	0.00254831	0.110482	0.000730923	0.000591133	0.00753387	0.018051	1
PM06	C02	Arg-Phe	N-Source,amino acid,dipeptide,Arg,Phe,,TCA,oxologlutarate,glutamate,Arg,-,-,TCA,Citrate,acetyl CoA,	23946	36688	25525.5	21797.5	28322.5	23603.5	31678	0.124752	0.0261773	0.00141516	0.0070225	0.0323939	0.00238326	1
PM06	C03	Arg-Ser	N-Source,amino acid,dipeptide,Arg,Ser,,TCA,oxologlutarate,glutamate,Arg,-,-,TCA,oxaloacetate,Pyruva	25891.5	42406.5	30150.5	22216	31903.5	27888.5	38300.5	0.0346171	0.138369	0.0059473	0.00431067	0.0250463	0.0120687	1
PM06	C04	Arg-Trp	N-Source,amino acid,dipeptide,Arg,Trp,,TCA,oxologlutarate,glutamate,Arg,-,-,TCA,Citrate,acetyl CoA,	21943.5	50947.5	31392.5	20779	35426.5	28411	41105	0.00913274	5.89601e-05	0.0154023	0.000283375	0.00518557	0.00617855	1
PM06	C05	Arg-Tyr	N-Source,amino acid,dipeptide,Arg,Tyr,,TCA,oxologlutarate,Glu,-,-,-,TCA,succinate,Tyr,-,-,-	23680.5	40799	28853.5	17414.5	26995.5	25901	33811	0.043685	0.0262885	0.0636616	0.00759975	0.0328324	0.0268742	1
PM06	C06	Arg-Val	N-Source,amino acid,dipeptide,Arg,Val,,TCA,oxologlutarate,glutamate,Arg,-,-,TCA,succinyl CoA,Val,-,	23092	37228.5	24382.5	17045	25707	23080	32282.5	0.00564828	0.0260623	0.0015476	0.0100333	0.037864	0.0120847	1
PM06	C07	Asn-Glu	N-Source,amino acid,dipeptide,Asn,Glu,,TCA,oxaloacetate,Asp,Asn,-,-,TCA,oxaloglutarate,Glu,-,-,-	9937	51868.5	37142	29101	36764	35359.5	44360.5	0.000543454	0.0231209	0.00749551	0.00172075	0.00890231	0.00504637	1
PM06	C08	Asn-Val	N-Source,amino acid,dipeptide,Asn,Val,,TCA,oxaloacetate,Asp,Asn,-,-,TCA,succinyl CoA,Val,-,-,-	14953	35022	26616	20081	27841	25985	32330	0.00682256	0.310369	0.0927562	0.0225961	0.0994421	0.0962872	1
PM06	C09	Asp-Asp	N-Source,amino acid,dipeptide,Asp,Asp,,TCA,oxaloacetate,Asp,-,-,-,TCA,oxaloacetate,Asp,-,-,-	10022.5	41941	28465	18872	29367.5	28289.5	34534.5	0.00179552	0.0841014	0.0755612	0.00854287	0.130572	0.10371	1
PM06	C10	Asp-Glu	N-Source,amino acid,dipeptide,Asp,Glu,,TCA,oxaloacetate,Asp,-,-,-,TCA,oxaloglutarate,Glu,-,-,-	11946	39854.5	27011	15864	26550	23746.5	34973.5	0.00512811	0.0350925	0.0395097	0.000748396	0.000281695	0.00685433	1
PM06	C11	Asp-Leu	N-Source,amino acid,dipeptide,Asp,Leu,,TCA,oxaloacetate,Asp,-,-,-,TCA,Citrate,acetyl CoA,Leu,-,-	14107	38608	29684	27039.5	32488	28067.5	34197.5	6.10512e-05	0.115142	0.0938351	0.170382	0.284501	0.142987	1
PM06	C12	Asp-Lys	N-Source,amino acid,dipeptide,Asp,Lys,,TCA,oxaloacetate,Asp,-,-,-,TCA,Citrate,acetyl CoA,Lys,-,-	17805.5	27862.5	22643.5	18675	21975.5	24232.5	26931.5	0.0199269	0.650645	0.0632202	0.0341088	0.0674816	0.455383	1
PM06	D01	Asp-Phe	N-Source,amino acid,dipeptide,Asp,Phe,,TCA,oxaloacetate,Asp,-,-,-,TCA,Citrate,acetyl CoA,Phe,-,-	15675	31923.5	24994.5	22455	26018	24482	30964.5	0.000309526	0.364335	0.00465025	0.00654861	0.00936314	0.00340145	1
PM06	D02	Asp-Trp	N-Source,amino acid,dipeptide,Asp,Trp,,TCA,oxaloacetate,Asp,-,-,-,TCA,Citrate,acetyl CoA,Trp,-,-	11655	29414	20163	15182	19697	20347.5	30090	0.000503073	0.0013322	2.68394e-05	0.0145342	0.00195813	0.0218634	1
PM06	D03	Asp-Val	N-Source,amino acid,dipeptide,Asp,Val,,TCA,oxaloacetate,Asp,-,-,-,TCA,succinyl CoA,Val,-,-,-	9784	30122	20809	16271	22363.5	20869.5	27302.5	0.00406297	0.120237	0.0322154	0.0158143	0.0613632	0.0797269	1
PM06	D04	Cys-Gly	N-Source,amino acid,dipeptide,Cys,Gly,,TCA,oxaloacetate,Pyruvate,gly ser thr metablolism,Cys,-,TCA,	9516.5	40789	32658	24292.5	21941.5	27359.5	35148	0.0040117	0.0616804	0.252471	0.0407064	0.0114739	0.0332759	1
PM06	D05	Gln-Gln	N-Source,amino acid,dipeptide,Gln,Gln,,TCA,oxologlutarate,glutamate,Gln,-,-,TCA,oxaloglutarate,glut	21525.5	50675	38298.5	28819	40848	33760.5	42563.5	0.00647307	0.0492692	0.10128	0.0118828	0.364343	0.0332979	1
PM06	D06	Gln-Gly	N-Source,amino acid,dipeptide,Gln,Gly,,TCA,oxologlutarate,glutamate,Gln,-,-,TCA,oxaloacetate,Pyruva	16424	46739	37240	23628	38866	32111.5	40264	0.00207948	0.0661551	0.175662	0.0326334	0.306526	0.0222085	1
PM06	D07	Glu-Asp	N-Source,amino acid,dipeptide,Glu,Asp,,TCA,oxologlutarate,Glu,,,,TCA,oxaloacetate,Asp,,,	9086	44282.5	29639.5	20254	30900.5	29174.5	38523.5	0.00146678	0.133783	0.0114101	0.00376287	0.0313366	0.0526839	1
PM06	D08	Glu-Glu	N-Source,amino acid,dipeptide,Glu,Glu,,TCA,oxologlutarate,Glu,-,-,-,TCA,oxaloglutarate,Glu,-,-,-	10488	45938.5	32603.5	23275.5	34567	31137	40081	0.000403454	0.161418	0.0267471	0.0114778	0.0313134	0.0234903	1
PM06	D09	Glu-Gly	N-Source,amino acid,dipeptide,Glu,Gly,,TCA,oxologlutarate,Glu,-,-,-,TCA,oxaloacetate,Pyruvate,Gly,-	10220.5	43808	29584.5	21385	31901.5	28277	39300.5	0.00533942	0.258369	0.0431832	0.0141627	0.100891	0.0757661	1
PM06	D10	Glu-Ser	N-Source,amino acid,dipeptide,Glu,Ser,,TCA,oxologlutarate,Glu,-,-,-,TCA,oxaloacetate,Pyruvate,Ser,-	12428	40426.5	30377.5	25010	31752	28362	36783.5	0.00300803	0.232362	0.0304817	0.0107597	0.0372709	0.0805999	1
PM06	D11	Glu-Trp	N-Source,amino acid,dipeptide,Glu,Trp,,TCA,oxologlutarate,Glu,-,-,-,TCA,Citrate,acetyl CoA,Trp,-,-	15760	34840	25649.5	19348	26162.5	26182.5	32990	0.00497298	0.259436	0.0408424	0.0397378	0.0329941	0.102966	1
PM06	D12	Glu-Tyr	N-Source,amino acid,dipeptide,Glu,Tyr,,TCA,oxologlutarate,Glu,-,-,-,TCA,succinate,Tyr,-,-,-	27184	34965.5	29618.5	25888	29507	28599.5	32476	0.222315	0.33708	0.0978114	0.0252761	0.167083	0.188323	1
PM06	E01	Glu-Val	N-Source,amino acid,dipeptide,Glu,Val,,TCA,oxologlutarate,Glu,-,-,-,TCA,succinyl CoA,Val,-,-,-	17047	28404	25210	22242	25865	24081	20405.5	0.798443	0.559977	0.718435	0.888824	0.683231	0.780372	1
PM06	E02	Gly-Ala	N-Source,amino acid,dipeptide,Gly,Ala,,TCA,oxaloacetate,Pyruvate,Gly,-,-,TCA,oxaloglutarate,Pyruvat	15431	34699.5	26016.5	22207	26442.5	22749.5	22731	0.450822	0.269662	0.717015	0.954586	0.685026	0.998337	1
PM06	E03	Gly-Arg	N-Source,amino acid,dipeptide,Gly,Arg,,TCA,oxaloacetate,Pyruvate,Gly,-,-,TCA,oxaloglutarate,glutama	12158	20640	15769	13736.5	15533.5	15856.5	16074	0.292467	0.202515	0.92397	0.436152	0.866079	0.945094	1
PM06	E04	Gly-Cys	N-Source,amino acid,dipeptide,Gly,Cys,,TCA,oxaloacetate,Pyruvate,Gly,-,-,TCA,oxaloacetate,Pyruvate,	18762	26785	22557	20757	18168.5	20694	19186	0.960819	0.377815	0.671721	0.840985	0.89424	0.844208	1
PM06	E05	Gly-Gly	N-Source,amino acid,dipeptide,Gly-6,Gly,,TCA,oxaloacetate,Pyruvate,Gly,-,-,TCA,oxaloacetate,Pyruvat	12137	30103	21363.5	14366	20146.5	18649	20320	0.332836	0.272448	0.886438	0.463874	0.981447	0.820292	1
PM06	E06	Gly-His	N-Source,amino acid,dipeptide,Gly,His,,TCA,oxaloacetate,Pyruvate,Gly,-,-,TCA,oxaloglutarate,glutama	14147	38792.5	25862.5	16753.5	23544	21497.5	33354.5	0.00557133	0.173558	0.131382	0.0895557	0.0415046	0.016936	1
PM06	E07	Gly-Leu	N-Source,amino acid,dipeptide,Gly,Leu,,TCA,oxaloacetate,Pyruvate,Gly,-,-,TCA,Citrate,acetyl CoA,Leu	11909.5	32237.5	23847	18625	24963.5	23484.5	24869.5	0.102866	0.252809	0.842541	0.296198	0.985502	0.793107	1
PM06	E08	Gly-Lys	N-Source,amino acid,dipeptide,Gly,Lys,,TCA,oxaloacetate,Pyruvate,Gly,-,-,TCA,Citrate,acetyl CoA,Lys	10659.5	19547	13811.5	11245.5	14782	16230	16410	0.163012	0.297579	0.350894	0.169244	0.568978	0.96395	1
PM06	E09	Gly-Met	N-Source,amino acid,dipeptide,Gly,Met,,TCA,oxaloacetate,Pyruvate,Gly,-,-,TCA,succinyl CoA,propanoat	12360.5	31169.5	22080.5	16159	23850.5	21172	26914.5	0.0228747	0.189767	0.167428	0.0642285	0.302073	0.135967	1
PM06	E10	Gly-Phe	N-Source,amino acid,dipeptide,Gly,Phe,,TCA,oxaloacetate,Pyruvate,Gly,-,-,TCA,Citrate,acetyl CoA,Phe	16786	34401	27895	19436	27521	23514.5	27274.5	0.0792957	0.175855	0.852642	0.134084	0.946551	0.423775	1
PM06	E11	Gly-Pro	N-Source,amino acid,dipeptide,Gly,Pro,,TCA,oxaloacetate,Pyruvate,Gly,-,-,TCA,oxaloglutarate,glutama	9828.5	35205	26578	19045.5	28693	23427	29234	0.0105477	0.248971	0.414125	0.110254	0.841881	0.117973	1
PM06	E12	Gly-Ser	N-Source,amino acid,dipeptide,Gly,Ser,,TCA,oxaloacetate,Pyruvate,Gly,-,-,TCA,oxaloacetate,Pyruvate,	20358.5	38931	31106	24594.5	32575.5	29497.5	38856	0.00135837	0.944309	0.00733296	0.00204789	0.0113422	0.00986353	1
PM06	F01	Gly-Thr	N-Source,amino acid,dipeptide,Gly,Thr,,TCA,oxaloacetate,Pyruvate,Gly,-,-,TCA,oxaloacetate,Pyruvate,	15921	34213.5	27642.5	25726	28995.5	28503.5	32281.5	0.00539171	0.353831	0.0985323	0.183084	0.0911134	0.0455583	1
PM06	F02	Gly-Trp	N-Source,amino acid,dipeptide,Gly,Trp,,TCA,oxaloacetate,Pyruvate,Gly,-,-,TCA,Citrate,acetyl CoA,Trp	11624.5	27651.5	21724	18047	20978.5	21495	27856.5	0.0265655	0.913786	0.0269436	0.0645739	0.0416447	0.0605753	1
PM06	F03	Gly-Tyr	N-Source,amino acid,dipeptide,Gly,Tyr,,TCA,oxaloacetate,Pyruvate,Gly,-,-,TCA,succinate,Tyr,-,-,-	11924	25098.5	19905	15186.5	17330.5	16381	23009	0.040223	0.449102	0.293136	0.0776791	0.100885	0.073292	1
PM06	F04	Gly-Val	N-Source,amino acid,dipeptide,Gly,Val,,TCA,oxaloacetate,Pyruvate,Gly,-,-,TCA,succinyl CoA,Val,-,-,-	11599	25598	20426.5	16750	20766	19571	24830.5	0.013575	0.695118	0.0421112	0.0411306	0.102344	0.0685886	1
PM06	F05	His-Asp	N-Source,amino acid,dipeptide,His,Asp,,TCA,oxologlutarate,glutamate,His,-,-,TCA,oxaloacetate,Asp,-,	13339	42908.5	27851.5	15373.5	27744	26870.5	37774.5	0.0182719	0.248251	0.0445264	0.0137092	0.0466216	0.0600606	1
PM06	F06	His-Gly	N-Source,amino acid,dipeptide,His,Gly,,TCA,oxologlutarate,glutamate,His,-,-,TCA,oxaloacetate,Pyruva	9766	38788	24226.5	15437	24992	22458.5	34786.5	0.008843	0.297286	0.0236201	0.0184667	0.109234	0.0226364	1
PM06	F07	His-Leu	N-Source,amino acid,dipeptide,His,Leu,,TCA,oxologlutarate,glutamate,His,-,-,TCA,Citrate,acetyl CoA,	14405.5	35300.5	23469	13296.5	21364.5	20451	29990	0.0281676	0.190445	0.261579	0.0221691	0.0628301	0.139215	1
PM06	F08	His-Lys	N-Source,amino acid,dipeptide,His,Lys,,TCA,oxologlutarate,glutamate,His,-,-,TCA,Citrate,acetyl CoA,	12660	23746	17300	13444	15324	21705.5	22143	0.106049	0.678007	0.190383	0.153464	0.123966	0.916806	1
PM06	F09	His-Met	N-Source,amino acid,dipeptide,His,Met,,TCA,oxologlutarate,glutamate,His,-,-,TCA,succinyl CoA,propan	12937.5	26209	18543.5	10178	15801	17046.5	23973.5	0.0546034	0.498013	0.0899155	0.0184207	0.13781	0.180924	1
PM06	F10	His-Pro	N-Source,amino acid,dipeptide,His,Pro,,TCA,oxologlutarate,glutamate,His,-,-,TCA,oxaloglutarate,glut	13909.5	40180	31461	24835.5	29074	27363.5	35948	0.00655438	0.207783	0.160041	0.0138175	0.0509994	0.116672	1
PM06	F11	His-Ser	N-Source,amino acid,dipeptide,His,Ser,,TCA,oxologlutarate,glutamate,His,-,-,TCA,oxaloacetate,Pyruva	20842.5	43655	28788.5	20286	30833.5	26866	37121	0.0167268	0.0160243	0.00696336	0.00189774	0.0541568	0.0205771	1
PM06	F12	His-Trp	N-Source,amino acid,dipeptide,His,Trp,,TCA,oxologlutarate,glutamate,His,-,-,TCA,Citrate,acetyl CoA,	23351.5	37668	24161.5	24928	26736.5	33154	38755	0.0107908	0.560935	0.124064	0.0950838	0.0442312	0.180593	1
PM06	G01	His-Tyr	N-Source,amino acid,dipeptide,His,Tyr,,TCA,oxologlutarate,glutamate,His,-,-,TCA,succinate,Tyr,-,-,-	18257	29324	24115	17498.5	24929	23059.5	29747.5	0.032358	0.776396	0.23395	0.0343582	0.0834558	0.0271824	1
PM06	G02	His-Val	N-Source,amino acid,dipeptide,His,Val,,TCA,oxologlutarate,glutamate,His,-,-,TCA,succinyl CoA,Val,-,	14209	26397.5	18545	14853	15789	16587	23106.5	0.045254	0.209752	0.250201	0.123857	0.0717332	0.0483279	1
PM06	G03	Ile-Ala	N-Source,amino acid,dipeptide,Ile,Ala,,TCA,succinyl CoA,Propionyl CoA,Ile,-,-,TCA,oxaloglutarate,Py	11637.5	39886.5	29385	21328	31858.5	25672	33453	0.030201	0.16914	0.234038	0.0813563	0.684325	0.153195	1
PM06	G04	Ile-Arg	N-Source,amino acid,dipeptide,Ile,Arg,,TCA,succinyl CoA,Propionyl CoA,Ile,-,-,TCA,oxaloglutarate,gl	14596.5	21871	20717	14984	16984.5	17538	17631	0.370485	0.256133	0.412847	0.483598	0.831373	0.975735	1
PM06	G05	Ile-Gln	N-Source,amino acid,dipeptide,Ile,Gln,,TCA,succinyl CoA,Propionyl CoA,Ile,-,-,TCA,oxaloglutarate,gl	11328.5	40241	32314	22035.5	34285	28621	34492	0.0279272	0.291103	0.50111	0.112577	0.95622	0.292277	1
PM06	G06	Ile-Gly	N-Source,amino acid,dipeptide,Ile,Gly,,TCA,succinyl CoA,Propionyl CoA,Ile,-,-,TCA,oxaloacetate,Pyru	8208	29800.5	21285.5	15598.5	20990.5	20556.5	26892	0.0404825	0.462934	0.170572	0.173355	0.26267	0.248424	1
PM06	G07	Ile-His	N-Source,amino acid,dipeptide,Ile,His,,TCA,succinyl CoA,Propionyl CoA,Ile,-,-,TCA,oxaloglutarate,gl	11130.5	30427	25018	15589	20941	18463	23534	0.0397025	0.0826885	0.70203	0.0166117	0.693773	0.29698	1
PM06	G08	Ile-Ile	N-Source,amino acid,dipeptide,Ile,Ile,,TCA,succinyl CoA,Propionyl CoA,Ile,-,-,TCA,succinyl CoA,Prop	10801.5	23281.5	14699	12437	17059	16130.5	20536.5	0.0640063	0.320253	0.090066	0.142952	0.276497	0.263691	1
PM06	G09	Ile-Met	N-Source,amino acid,dipeptide,Ile,Met,,TCA,succinyl CoA,Propionyl CoA,Ile,-,-,TCA,succinyl CoA,prop	10906	22946	15014.5	11042.5	17283.5	15589.5	18831	0.104775	0.208389	0.226688	0.104484	0.613727	0.318847	1
PM06	G10	Ile-Phe	N-Source,amino acid,dipeptide,Ile,Phe,,TCA,succinyl CoA,Propionyl CoA,Ile,-,-,TCA,Citrate,acetyl Co	13638.5	26313.5	18076	15019	19682.5	18591.5	23867	0.0962294	0.233054	0.0662724	0.0816085	0.124805	0.173078	1
PM06	G11	Ile-Pro	N-Source,amino acid,dipeptide,Ile,Pro,,TCA,succinyl CoA,Propionyl CoA,Ile,-,-,TCA,oxaloglutarate,gl	11705.5	33929	27231	21084.5	27051.5	23811.5	30402.5	0.0208792	0.244565	0.418003	0.115484	0.271519	0.138257	1
PM06	G12	Ile-Ser	N-Source,amino acid,dipeptide,Ile,Ser,,TCA,succinyl CoA,Propionyl CoA,Ile,-,-,TCA,oxaloacetate,Pyru	15637	38734	30891	24527.5	31439	29902	38270.5	0.0081134	0.652014	0.035795	0.0167539	0.044701	0.0596917	1
PM06	H01	Ile-Trp	N-Source,amino acid,dipeptide,Ile,Trp,,TCA,succinyl CoA,Propionyl CoA,Ile,-,-,TCA,Citrate,acetyl Co	20276	39592.5	24789.5	19921	26884	25713.5	35456.5	0.0696946	0.480489	0.125845	0.102839	0.185534	0.170302	1
PM06	H02	Ile-Tyr	N-Source,amino acid,dipeptide,Ile,Tyr,,TCA,succinyl CoA,Propionyl CoA,Ile,-,-,TCA,succinate,Tyr,-,-	14640.5	24656.5	18771.5	17134	18807.5	16725	20719.5	0.283473	0.470406	0.647367	0.490437	0.693677	0.412817	1
PM06	H03	Ile-Val	N-Source,amino acid,dipeptide,Ile,Val,,TCA,succinyl CoA,Propionyl CoA,Ile,-,-,TCA,succinyl CoA,Val,	10765	21082	13621	11825.5	15099.5	14694.5	19575.5	0.235108	0.774258	0.324064	0.269745	0.441536	0.411769	1
PM06	H04	Leu-Ala	N-Source,amino acid,dipeptide,Leu,Ala,,TCA,Citrate,acetyl CoA,Leu,-,-,TCA,oxaloglutarate,Pyruvate,A	13668	34223.5	27660	22255	28123	25402.5	30977.5	0.100464	0.591264	0.508445	0.250403	0.601876	0.381689	1
PM06	H05	Leu-Arg	N-Source,amino acid,dipeptide,Leu,Arg,,TCA,Citrate,acetyl CoA,Leu,-,-,TCA,oxaloglutarate,glutamate,	14330	20610	18723	14117.5	17101	18285.5	16954	0.698195	0.615081	0.793699	0.686204	0.981848	0.84042	1
PM06	H06	Leu-Asp	N-Source,amino acid,dipeptide,Leu,Asp,,TCA,Citrate,acetyl CoA,Leu,-,-,TCA,oxaloacetate,Asp,-,-,-	10391.5	34543.5	27264.5	19359	28375	26135	31956	0.0806439	0.710353	0.502865	0.2421	0.634515	0.529176	1
PM06	H07	Leu-Glu	N-Source,amino acid,dipeptide,Leu,Glu,,TCA,Citrate,acetyl CoA,Leu,-,-,TCA,oxaloglutarate,Glu,-,-,-	11458	34321.5	29284.5	22309.5	30185	27300.5	34707.5	0.0399678	0.939749	0.264995	0.0937635	0.4276	0.28097	1
PM06	H08	Leu-Gly	N-Source,amino acid,dipeptide,Leu,Gly,,TCA,Citrate,acetyl CoA,Leu,-,-,TCA,oxaloacetate,Pyruvate,Gly	10937	29301.5	24166.5	18969	24434	22264.5	28373	0.0731046	0.851801	0.458291	0.24502	0.516415	0.392087	1
PM06	H09	Leu-Ile	N-Source,amino acid,dipeptide,Leu,Ile,,TCA,Citrate,acetyl CoA,Leu,-,-,TCA,succinyl CoA,Propionyl Co	12479	24525	15286.5	12390	18250	16990	23287.5	0.120957	0.755428	0.157729	0.151833	0.327083	0.285193	1
PM06	H10	Leu-Leu	N-Source,amino acid,dipeptide,Leu,Leu,,TCA,Citrate,acetyl CoA,Leu,-,-,TCA,Citrate,acetyl CoA,Leu,-,	13696.5	24937	17545	13477	20841	18174.5	22712	0.240083	0.683535	0.397376	0.21995	0.728788	0.486342	1
PM06	H11	Leu-Met	N-Source,amino acid,dipeptide,Leu,Met,,TCA,Citrate,acetyl CoA,Leu,-,-,TCA,succinyl CoA,propanoate m	14554.5	24790	17711	15974.5	19797	19877.5	23830.5	0.142787	0.793064	0.235125	0.208832	0.374953	0.487497	1
PM06	H12	Leu-Phe	N-Source,amino acid,dipeptide,Leu,Phe,,TCA,Citrate,acetyl CoA,Leu,-,-,TCA,Citrate,acetyl CoA,Phe,-,	19561.5	27939.5	21707.5	19748	23930.5	24045.5	28236	0.148607	0.898667	0.0814734	0.135157	0.230391	0.288356	1
PM07	A01	Background	N-Source,Background,,,,,-,-,-,-,-,-,-,-,-,-,-,-	16302.5	19313	19549	16020.5	19955	19586	20315.5	0.19657	0.807177	0.770926	0.183419	0.908871	0.805923	1
PM07	A02	L-Glutamine	N-Source,amino acid,amino acid,Gln,AA,,TCA,oxologlutarate,glutamate,Gln,-,-,-,-,-,-,-,-	45697	47532	42280.5	36937.5	43018.5	37174	46171.5	0.812859	0.536756	0.111412	0.0226333	0.180335	0.0731319	1
PM07	A03	Leu-Ser	N-Source,amino acid,dipeptide,Leu,Ser,,TCA,Citrate,acetyl CoA,Leu,-,-,TCA,oxaloacetate,Pyruvate,Ser	11825.5	29736	26475.5	21511.5	26264.5	22878	30427	0.0146438	0.835819	0.226311	0.0471277	0.185864	0.0804063	1
PM07	A04	Leu-Trp	N-Source,amino acid,dipeptide,Leu,Trp,,TCA,Citrate,acetyl CoA,Leu,-,-,TCA,Citrate,acetyl CoA,Trp,-,	13106.5	33272	22738	13414	20942.5	21466	34405.5	0.0032257	0.642665	0.0136129	0.00298151	0.00974071	0.0469247	1
PM07	A05	Leu-Val	N-Source,amino acid,dipeptide,Leu,Val,,TCA,Citrate,acetyl CoA,Leu,-,-,TCA,succinyl CoA,Val,-,-,-	10684.5	19529.5	14874.5	10686.5	15032	13850	18823	0.067107	0.863411	0.308956	0.08669	0.318141	0.247867	1
PM07	A06	Lys-Ala	N-Source,amino acid,dipeptide,Lys,Ala,,TCA,Citrate,acetyl CoA,Lys,-,-,TCA,oxaloglutarate,Pyruvate,A	16987	33935.5	30079	22124	28333	24635	32977.5	0.0250813	0.79862	0.383227	0.03706	0.244658	0.132253	1
PM07	A07	Lys-Arg	N-Source,amino acid,dipeptide,Lys,Arg,,TCA,Citrate,acetyl CoA,Lys,-,-,TCA,oxaloglutarate,glutamate,	39293	37657	29328.5	23773.5	35387	28815.5	31856.5	0.154496	0.0062045	0.0420314	0.0118844	0.0976005	0.0214054	1
PM07	A08	Lys-Glu	N-Source,amino acid,dipeptide,Lys,Glu,,TCA,Citrate,acetyl CoA,Lys,-,-,TCA,oxaloglutarate,Glu,-,-,-	12395.5	35336	28676.5	23107	28974	25998	34713.5	0.00238599	0.787439	0.0457929	0.00484702	0.0472954	0.0364542	1
PM07	A09	Lys-Ile	N-Source,amino acid,dipeptide,Lys,Ile,,TCA,Citrate,acetyl CoA,Lys,-,-,TCA,succinyl CoA,Propionyl Co	15558	25747.5	22080	15482	20913	19016.5	23758.5	0.00837211	0.594728	0.31421	0.0148826	0.289371	0.0640694	1
PM07	A10	Lys-Leu	N-Source,amino acid,dipeptide,Lys,Leu,,TCA,Citrate,acetyl CoA,Lys,-,-,TCA,Citrate,acetyl CoA,Leu,-,	13139	25116	21541	13759.5	21633.5	18350	23157.5	0.0664972	0.677778	0.610569	0.0638283	0.672314	0.289024	1
PM07	A11	Lys-Lys	N-Source,amino acid,dipeptide,Lys,Lys,,TCA,Citrate,acetyl CoA,Lys,-,-,TCA,Citrate,acetyl CoA,Lys,-,	15798.5	22484.5	22288	15669	21790	18450.5	19515.5	0.0533404	0.530124	0.290322	0.0508398	0.427965	0.574004	1
PM07	A12	Lys-Phe	N-Source,amino acid,dipeptide,Lys,Phe,,TCA,Citrate,acetyl CoA,Lys,-,-,TCA,Citrate,acetyl CoA,Phe,-,	18306	24594	22825.5	18036	22345	20491	22404.5	0.0155168	0.64159	0.874445	0.0305534	0.985841	0.144036	1
PM07	B01	Lys-Pro	N-Source,amino acid,dipeptide,Lys,Pro,,TCA,Citrate,acetyl CoA,Lys,-,-,TCA,oxaloglutarate,glutamate,	10034.5	34506.5	27809.5	21546	28310	27570.5	36929.5	0.0312899	0.116752	0.0153386	0.03948	0.0140817	0.00937991	1
PM07	B02	Lys-Ser	N-Source,amino acid,dipeptide,Lys,Ser,,TCA,Citrate,acetyl CoA,Lys,-,-,TCA,oxaloacetate,Pyruvate,Ser	11437.5	29295.5	21422	18521.5	22084	20448.5	28282	0.000748884	0.365666	0.00784326	0.0117478	0.00723575	0.00715328	1
PM07	B03	Lys-Thr	N-Source,amino acid,dipeptide,Lys,Thr,,TCA,Citrate,acetyl CoA,Lys,-,-,TCA,oxaloacetate,Pyruvate,Thr	11720.5	25731.5	19052.5	17323.5	18859.5	18846.5	25308	0.00183965	0.523586	0.0158846	0.053635	0.0103278	0.00802053	1
PM07	B04	Lys-Trp	N-Source,amino acid,dipeptide,Lys,Trp,,TCA,Citrate,acetyl CoA,Lys,-,-,TCA,Citrate,acetyl CoA,Trp,-,	13591.5	28783.5	21026	13179	19275.5	18405.5	25789.5	0.00330256	0.101694	0.0192796	0.00278488	0.0242647	0.0175172	1
PM07	B05	Lys-Tyr	N-Source,amino acid,dipeptide,Lys,Tyr,,TCA,Citrate,acetyl CoA,Lys,-,-,TCA,succinate,Tyr,-,-,-	10771.5	16685	14200	9074.5	12861	12039	15315.5	0.145044	0.690732	0.67309	0.107157	0.406082	0.397377	1
PM07	B06	Lys-Val	N-Source,amino acid,dipeptide,Lys,Val,,TCA,Citrate,acetyl CoA,Lys,-,-,TCA,succinyl CoA,Val,-,-,-	10859.5	17734.5	15540.5	9173.5	14505.5	13497	17157	0.100062	0.888946	0.567027	0.0403526	0.393243	0.385631	1
PM07	B07	Met-Arg	N-Source,amino acid,dipeptide,Met,Arg,,TCA,succinyl CoA,propanoate metabolism,gly ser thr metabloli	22011.5	34935	27176.5	17569.5	22813	23793	33657.5	0.0248065	0.441827	0.0238744	0.00446286	0.00314561	0.0193541	1
PM07	B08	Met-Asp	N-Source,amino acid,dipeptide,Met,Asp,,TCA,succinyl CoA,propanoate metabolism,gly ser thr metabloli	10033.5	33619.5	25167.5	17963.5	24195	22970	31096	0.00500104	0.186808	0.0813809	0.0271107	0.0599024	0.0244541	1
PM07	B09	Met-Gln	N-Source,amino acid,dipeptide,Met,Gln,,TCA,succinyl CoA,propanoate metabolism,gly ser thr metabloli	21220.5	40186	30096.5	23607	30599	28820	40252	0.00247967	0.8642	0.00256688	0.00618103	0.00183327	0.00107141	1
PM07	B10	Met-Glu	N-Source,amino acid,dipeptide,Met,Glu,,TCA,succinyl CoA,propanoate metabolism,gly ser thr metabloli	13576.5	34957	25223.5	21774	26210	25756	34365	0.00300079	0.478052	6.09664e-05	0.020742	0.000994334	0.000680006	1
PM07	B11	Met-Gly	N-Source,amino acid,dipeptide,Met,Gly,,TCA,succinyl CoA,propanoate metabolism,gly ser thr metabloli	14854	30523.5	25080.5	19502.5	25112	22748	29118.5	0.0231864	0.632827	0.248805	0.085233	0.284011	0.104552	1
PM07	B12	Met-His	N-Source,amino acid,dipeptide,Met,His,,TCA,succinyl CoA,propanoate metabolism,gly ser thr metabloli	19068.5	30262.5	23138	17860.5	21899.5	25563.5	32654.5	0.0355856	0.24164	0.023467	0.0136479	0.0230281	0.0526222	1
PM07	C01	Met-Ile	N-Source,amino acid,dipeptide,Met,Ile,,TCA,succinyl CoA,propanoate metabolism,gly ser thr metabloli	13335	20587.5	16772.5	13027.5	15516	17298.5	19320	0.0468762	0.536775	0.278361	0.0378809	0.0923189	0.247673	1
PM07	C02	Met-Leu	N-Source,amino acid,dipeptide,Met,Leu,,TCA,succinyl CoA,propanoate metabolism,gly ser thr metabloli	8605.5	18738.5	12927.5	8937	13307	13215.5	17735	0.00303535	0.430201	0.0707198	0.00478841	0.009694	0.0479598	1
PM07	C03	Met-Lys	N-Source,amino acid,dipeptide,Met,Lys,,TCA,succinyl CoA,propanoate metabolism,gly ser thr metabloli	7964.5	14289.5	11039	7761	11142.5	10715	14549.5	0.0102524	0.814101	0.0294585	0.00724905	0.035587	0.0436459	1
PM07	C04	Met-Met	N-Source,amino acid,dipeptide,Met,Met,,TCA,succinyl CoA,propanoate metabolism,gly ser thr metabloli	7505	14163	11160	6924	10393.5	10172	13628	0.0362585	0.824192	0.311097	0.027795	0.105135	0.169185	1
PM07	C05	Met-Phe	N-Source,amino acid,dipeptide,Met,Phe,,TCA,succinyl CoA,propanoate metabolism,gly ser thr metabloli	8706	15024.5	12624.5	7322.5	11675	11096.5	14398	0.0650678	0.797632	0.2897	0.0340206	0.168487	0.244326	1
PM07	C06	Met-Pro	N-Source,amino acid,dipeptide,Met,Pro,,TCA,succinyl CoA,propanoate metabolism,gly ser thr metabloli	7569	29399.5	20911	10449	21840	16340	23711.5	0.000345025	0.0132799	0.0193631	0.00176548	0.0168687	0.00690109	1
PM07	C07	Met-Trp	N-Source,amino acid,dipeptide,Met,Trp,,TCA,succinyl CoA,propanoate metabolism,gly ser thr metabloli	9820.5	25329	17758	10888.5	16601	17672.5	26283	0.00371993	0.611827	0.0291998	0.00425973	0.0113502	0.0172245	1
PM07	C08	Met-Val	N-Source,amino acid,dipeptide,Met,Val,,TCA,succinyl CoA,propanoate metabolism,gly ser thr metabloli	11029.5	19118	15967	10673	15355	14564	19046.5	0.0263366	0.93887	0.182049	0.0399285	0.141774	0.0654257	1
PM07	C09	Phe-Ala	N-Source,amino acid,dipeptide,Phe,Ala,,TCA,Citrate,acetyl CoA,Phe,-,-,TCA,oxaloglutarate,Pyruvate,A	13021.5	31504	25409.5	19503.5	24332	22970	30499.5	0.00470508	0.46684	0.113298	0.0306064	0.0827461	0.0117647	1
PM07	C10	Phe-Gly	N-Source,amino acid,dipeptide,Phe,Gly,,TCA,Citrate,acetyl CoA,Phe,-,-,TCA,oxaloacetate,Pyruvate,Gly	10260.5	28068.5	22682.5	17467.5	21857	20852.5	25557.5	0.000679059	0.116443	0.0107349	0.0327125	0.00198595	0.0019221	1
PM07	C11	Phe-Ile	N-Source,amino acid,dipeptide,Phe,Ile,,TCA,Citrate,acetyl CoA,Phe,-,-,TCA,succinyl CoA,Propionyl Co	12705	23667	19472.5	12583.5	17656	16542.5	21495	0.00851062	0.0847693	0.178512	0.026948	0.0459952	0.0435404	1
PM07	C12	Phe-Phe	N-Source,amino acid,dipeptide,Phe,Phe,,TCA,Citrate,acetyl CoA,Phe,-,-,TCA,Citrate,acetyl CoA,Phe,-,	16633.5	22836.5	19111.5	16665.5	19005	18784.5	22036	0.201892	0.747661	0.386924	0.190974	0.314782	0.340011	1
PM07	D01	Phe-Pro	N-Source,amino acid,dipeptide,Phe,Pro,,TCA,Citrate,acetyl CoA,Phe,-,-,TCA,oxaloglutarate,glutamate,	11560	28869.5	24809.5	19105.5	24379	23103.5	29025.5	0.00901087	0.947887	0.129843	0.0287202	0.169068	0.0819252	1
PM07	D02	Phe-Ser	N-Source,amino acid,dipeptide,Phe,Ser,,TCA,Citrate,acetyl CoA,Phe,-,-,TCA,oxaloacetate,Pyruvate,Ser	7917.5	25587.5	18718.5	17199	19418.5	18981	24151.5	0.00100971	0.0900036	0.0301336	0.00568701	0.0195113	0.0365967	1
PM07	D03	Phe-Trp	N-Source,amino acid,dipeptide,Phe,Trp,,TCA,Citrate,acetyl CoA,Phe,-,-,TCA,Citrate,acetyl CoA,Trp,-,	9324.5	23970	15748.5	8442	15598.5	13898	23531.5	0.00166958	0.460111	0.0163911	0.00378169	0.0209221	0.00108645	1
PM07	D04	Pro-Ala	N-Source,amino acid,dipeptide,Pro,Ala,,TCA,oxologlutarate,glutamate,Pro,-,-,TCA,oxaloglutarate,Pyru	10248.5	39192.5	30948.5	20543	31901	29479.5	39036.5	0.00164842	0.933365	0.0169214	0.00342538	0.178278	0.0101064	1
PM07	D05	Pro-Asp	N-Source,amino acid,dipeptide,Pro,Asp,,TCA,oxologlutarate,glutamate,Pro,-,-,TCA,oxaloacetate,Asp,-,	6958	30268.5	21906.5	17188	19975.5	18922	26407.5	0.00200198	0.0348744	0.032713	0.177204	0.0252206	0.0261986	1
PM07	D06	Pro-Gln	N-Source,amino acid,dipeptide,Pro,Gln,,TCA,oxologlutarate,glutamate,Pro,-,-,TCA,oxaloglutarate,glut	12373.5	39481	29327	20278.5	29257.5	26799	36989.5	0.000230327	0.290558	0.0386334	0.000221959	0.0412904	0.000559081	1
PM07	D07	Pro-Gly	N-Source,amino acid,dipeptide,Pro,Gly,,TCA,oxologlutarate,glutamate,Pro,-,-,TCA,oxaloacetate,Pyruva	8124.5	32059	23424.5	15350	20932.5	19648	27135.5	0.00423088	0.0745987	0.223892	0.00855489	0.108195	0.00664078	1
PM07	D08	Pro-Hyp	N-Source,amino acid,dipeptide,Pro,Hyp,,TCA,oxologlutarate,glutamate,Pro,-,-,-,-,-,-,-,-	8203.5	15665	12732.5	8612	12508	11995.5	15966	0.00758072	0.804108	0.0547792	0.0137054	0.0511799	0.0318354	1
PM07	D09	Pro-Leu	N-Source,amino acid,dipeptide,Pro,Leu,,TCA,oxologlutarate,glutamate,Pro,-,-,TCA,Citrate,acetyl CoA,	13477	39080	29776.5	22157.5	32565	29155.5	38238.5	0.0065896	0.782548	0.0610733	0.0245788	0.252862	0.0415753	1
PM07	D10	Pro-Phe	N-Source,amino acid,dipeptide,Pro,Phe,,TCA,oxologlutarate,glutamate,Pro,-,-,TCA,Citrate,acetyl CoA,	12793.5	38582	28971	25462	30644.5	27903	36719	0.00504013	0.502125	0.0688463	0.0302666	0.105712	0.0544292	1
PM07	D11	Pro-Pro	N-Source,amino acid,dipeptide,Pro,Pro,,TCA,oxologlutarate,glutamate,Pro,-,-,TCA,oxaloglutarate,glut	11472.5	31088	27360.5	18758.5	28078	22237	28655.5	0.00192486	0.124254	0.124206	0.016775	0.839368	0.00379233	1
PM07	D12	Pro-Tyr	N-Source,amino acid,dipeptide,Pro,Tyr,,TCA,oxologlutarate,glutamate,Pro,-,-,TCA,succinate,Tyr,-,-,-	19035	33260.5	27382	22048	24629	26851	31699	0.0349999	0.440579	0.145874	0.232443	0.0930184	0.110032	1
PM07	E01	Ser-Ala	N-Source,amino acid,dipeptide,Ser,Ala,,TCA,oxaloacetate,Pyruvate,Ser,-,-,TCA,oxaloglutarate,Pyruvat	18507	36012.5	31899.5	26737	31865	17630	36158	0.000681439	0.832497	0.0333212	0.0271262	0.0821895	0.253996	1
PM07	E02	Ser-Gly	N-Source,amino acid,dipeptide,Ser,Gly,,TCA,oxaloacetate,Pyruvate,Ser,-,-,TCA,oxaloacetate,Pyruvate,	8151.5	33195	23565	16854	22652	19387.5	28857	0.00201459	0.108325	0.0638898	0.00822913	0.0532754	0.0154514	1
PM07	E03	Ser-His	N-Source,amino acid,dipeptide,Ser,His,,TCA,oxaloacetate,Pyruvate,Ser,-,-,TCA,oxaloglutarate,glutama	21513	38493	24018.5	16851.5	22489	23603.5	35996	0.00421618	0.293726	0.0124103	0.00239663	0.0143376	0.00442789	1
PM07	E04	Ser-Leu	N-Source,amino acid,dipeptide,Ser,Leu,,TCA,oxaloacetate,Pyruvate,Ser,-,-,TCA,Citrate,acetyl CoA,Leu	12026	30664	25152	19637	24993	21559.5	30686.5	0.00437254	0.985028	0.0379368	0.0140234	0.0530701	0.00537353	1
PM07	E05	Ser-Met	N-Source,amino acid,dipeptide,Ser,Met,,TCA,oxaloacetate,Pyruvate,Ser,-,-,TCA,succinyl CoA,propanoat	11852	28865	20647.5	14219.5	20853.5	19961.5	28245	0.00333246	0.736528	0.050228	0.0162173	0.0322132	0.00891555	1
PM07	E06	Ser-Phe	N-Source,amino acid,dipeptide,Ser,Phe,,TCA,oxaloacetate,Pyruvate,Ser,-,-,TCA,Citrate,acetyl CoA,Phe	17028.5	32931.5	22156.5	17324	22447.5	21886	31356	0.00952817	0.262688	0.0243884	0.0167069	0.0216461	0.00784039	1
PM07	E07	Ser-Pro	N-Source,amino acid,dipeptide,Ser,Pro,,TCA,oxaloacetate,Pyruvate,Ser,-,-,TCA,oxaloglutarate,glutama	8481	39368.5	30127	22653.5	31201.5	26506.5	38923.5	0.00186392	0.863541	0.0639177	0.00314285	0.151629	0.00623342	1
PM07	E08	Ser-Ser	N-Source,amino acid,dipeptide,Ser,Ser,,TCA,oxaloacetate,Pyruvate,Ser,-,-,TCA,oxaloacetate,Pyruvate,	12928	35112	28925.5	17688.5	26991	20840.5	31403.5	0.00661594	0.253213	0.393341	0.00910908	0.220144	0.0203167	1
PM07	E09	Ser-Tyr	N-Source,amino acid,dipeptide,Ser,Tyr,,TCA,oxaloacetate,Pyruvate,Ser,-,-,TCA,succinate,Tyr,-,-,-	18189.5	28238.5	22256.5	15489.5	21154.5	21072.5	28566.5	0.00430447	0.563455	0.0197825	4.46996e-05	0.040092	0.000682749	1
PM07	E10	Ser-Val	N-Source,amino acid,dipeptide,Ser,Val,,TCA,oxaloacetate,Pyruvate,Ser,-,-,TCA,succinyl CoA,Val,-,-,-	16491	29633.5	25347.5	19344	24526	22673.5	29564.5	0.0214963	0.968179	0.284684	0.0619207	0.172527	0.0434649	1
PM07	E11	Thr-Ala	N-Source,amino acid,dipeptide,Thr,Ala,,TCA,oxaloacetate,Pyruvate,Thr,-,-,TCA,oxaloglutarate,Pyruvat	15071	37555.5	33050	24663	32628	29501	34693	0.00300147	0.133415	0.525998	0.101258	0.459163	0.0679462	1
PM07	E12	Thr-Arg	N-Source,amino acid,dipeptide,Thr,Arg,,TCA,oxaloacetate,Pyruvate,Thr,-,-,TCA,oxaloglutarate,glutama	22088.5	43151	39785	25353.5	33514.5	32767.5	37531.5	0.000198772	0.00068429	0.360489	0.00922853	0.167741	0.00308181	1
PM07	F01	Thr-Glu	N-Source,amino acid,dipeptide,Thr,Glu,,TCA,oxaloacetate,Pyruvate,Thr,-,-,TCA,oxaloglutarate,Glu,-,-	13179.5	39322.5	32568.5	25840	33465	34141.5	40592.5	0.000958324	0.456451	0.0478008	0.0177068	0.0500767	0.0120605	1
PM07	F02	Thr-Gly	N-Source,amino acid,dipeptide,Thr,Gly,,TCA,oxaloacetate,Pyruvate,Thr,-,-,TCA,oxaloacetate,Pyruvate,	9022.5	30054.5	24668	18944	24925.5	22433.5	27397	0.0052483	0.131001	0.0352523	0.0441198	0.099831	0.0208708	1
PM07	F03	Thr-Leu	N-Source,amino acid,dipeptide,Thr,Leu,,TCA,oxaloacetate,Pyruvate,Thr,-,-,TCA,Citrate,acetyl CoA,Leu	8751	29761	22781.5	13142.5	22886.5	20535.5	28183	0.00819639	0.562089	0.110032	0.0163413	0.0807466	0.0274013	1
PM07	F04	Thr-Met	N-Source,amino acid,dipeptide,Thr,Met,,TCA,oxaloacetate,Pyruvate,Thr,-,-,TCA,succinyl CoA,propanoat	9850.5	27108.5	20689.5	13576	21908.5	21117	28632	0.00286711	0.350608	0.0183112	0.00454599	0.0364142	0.0106308	1
PM07	F05	Thr-Pro	N-Source,amino acid,dipeptide,Thr,Pro,,TCA,oxaloacetate,Pyruvate,Thr,-,-,TCA,oxaloglutarate,glutama	7505	37231	27519	18798.5	30288	26019	35349.5	0.00431851	0.625303	0.130917	0.036803	0.186487	0.0257535	1
PM07	F06	Trp-Ala	N-Source,amino acid,dipeptide,Trp,Ala,,TCA,Citrate,acetyl CoA,Trp,-,-,TCA,oxaloglutarate,Pyruvate,A	10366.5	28218	20467	15209	18976	20853.5	28871	0.0254071	0.789693	0.125881	0.0785124	0.0823372	0.0615151	1
PM07	F07	Trp-Arg	N-Source,amino acid,dipeptide,Trp,Arg,,TCA,Citrate,acetyl CoA,Trp,-,-,TCA,oxaloglutarate,glutamate,	13728	27387	21038.5	13766.5	19451.5	18235	25151.5	0.0513401	0.447495	0.500361	0.132233	0.253692	0.10526	1
PM07	F08	Trp-Asp	N-Source,amino acid,dipeptide,Trp,Asp,,TCA,Citrate,acetyl CoA,Trp,-,-,TCA,oxaloacetate,Asp,-,-,-	10530	32386	23911.5	15044	22437	23134.5	32303	0.00804307	0.968964	0.128896	0.03127	0.0869219	0.0308096	1
PM07	F09	Trp-Glu	N-Source,amino acid,dipeptide,Trp,Glu,,TCA,Citrate,acetyl CoA,Trp,-,-,TCA,oxaloglutarate,Glu,-,-,-	10564.5	31894	25593	16232	24958	23755	31400.5	0.00164302	0.750562	0.173441	0.0171036	0.150126	0.00811087	1
PM07	F10	Trp-Gly	N-Source,amino acid,dipeptide,Trp,Gly,,TCA,Citrate,acetyl CoA,Trp,-,-,TCA,oxaloacetate,Pyruvate,Gly	13125	28131.5	24250	17199.5	20497	23521	31200	0.00945885	0.17033	0.0638339	0.0287917	0.0383533	0.0086154	1
PM07	F11	Trp-Leu	N-Source,amino acid,dipeptide,Trp,Leu,,TCA,Citrate,acetyl CoA,Trp,-,-,TCA,Citrate,acetyl CoA,Leu,-,	13677	30830.5	24773.5	16304.5	20960.5	22603	31432	0.0183428	0.67105	0.083276	0.0236575	0.0289621	0.0364669	1
PM07	F12	Trp-Lys	N-Source,amino acid,dipeptide,Trp,Lys,,TCA,Citrate,acetyl CoA,Trp,-,-,TCA,Citrate,acetyl CoA,Lys,-,	17641	23327	20667.5	17506.5	20301	22160	24961.5	0.0166929	0.157093	0.00932051	0.0232828	0.0161825	0.0334837	1
PM07	G01	Trp-Phe	N-Source,amino acid,dipeptide,Trp,Phe,,TCA,Citrate,acetyl CoA,Trp,-,-,TCA,Citrate,acetyl CoA,Phe,-,	15690	26453	19926.5	15575.5	20175.5	21111.5	26765.5	0.0533875	0.906709	0.109396	0.0452666	0.121066	0.130064	1
PM07	G02	Trp-Ser	N-Source,amino acid,dipeptide,Trp,Ser,,TCA,Citrate,acetyl CoA,Trp,-,-,TCA,oxaloacetate,Pyruvate,Ser	9883	26176.5	19683.5	16769	18923	19483	25854.5	0.0210132	0.884023	0.0707806	0.0681907	0.107802	0.0338881	1
PM07	G03	Trp-Trp	N-Source,amino acid,dipeptide,Trp,Trp,,TCA,Citrate,acetyl CoA,Trp,-,-,TCA,Citrate,acetyl CoA,Trp,-,	13612.5	20858	15292.5	19898	16471.5	18976.5	27210.5	0.197114	0.251617	0.0919608	0.239725	0.117215	0.094997	1
PM07	G04	Trp-Tyr	N-Source,amino acid,dipeptide,Trp,Tyr,,TCA,Citrate,acetyl CoA,Trp,-,-,TCA,succinate,Tyr,-,-,-	11068	19770.5	14021	13013	14369.5	15079	20356	0.0994261	0.831336	0.143921	0.118908	0.163606	0.106072	1
PM07	G05	Tyr-Ala	N-Source,amino acid,dipeptide,Tyr,Ala,,TCA,succinate,Tyr,-,-,-,TCA,oxaloglutarate,Pyruvate,Ala,-,-	13510.5	26661.5	20573.5	16080.5	17871.5	18241.5	25291.5	0.0868618	0.758652	0.434661	0.0659174	0.25277	0.159957	1
PM07	G06	Tyr-Gln	N-Source,amino acid,dipeptide,Tyr,Gln,,TCA,succinate,Tyr,-,-,-,TCA,oxaloglutarate,glutamate,Gln,-,-	17927.5	29001.5	22474	17293.5	20061.5	19540.5	27267	0.127753	0.693967	0.370303	0.0483232	0.245119	0.108028	1
PM07	G07	Tyr-Glu	N-Source,amino acid,dipeptide,Tyr,Glu,,TCA,succinate,Tyr,-,-,-,TCA,oxaloglutarate,Glu,-,-,-	10583	31097.5	23928	16151	22014	21694	27527.5	0.0152835	0.309248	0.393616	0.0345827	0.213435	0.0418009	1
PM07	G08	Tyr-Gly	N-Source,amino acid,dipeptide,Tyr,Gly,,TCA,succinate,Tyr,-,-,-,TCA,oxaloacetate,Pyruvate,Gly,-,-	9028.5	25208	19761.5	13674	16930	19414	27013	0.0215024	0.528654	0.131522	0.0845906	0.0815649	0.104906	1
PM07	G09	Tyr-His	N-Source,amino acid,dipeptide,Tyr,His,,TCA,succinate,Tyr,-,-,-,TCA,oxaloglutarate,Glu,His,-,-	13927.5	29196	20273	17612	17779.5	17812	26583	0.0379251	0.442657	0.0730715	0.0274113	0.139788	0.0663239	1
PM07	G10	Tyr-Leu	N-Source,amino acid,dipeptide,Tyr,Leu,,TCA,succinate,Tyr,-,-,-,TCA,Citrate,acetyl CoA,Leu,-,-	13572	22314	17064.5	11822	16304	15977.5	21574	0.0511652	0.669696	0.117735	0.0436269	0.132454	0.0306725	1
PM07	G11	Tyr-Lys	N-Source,amino acid,dipeptide,Tyr,Lys,,TCA,succinate,Tyr,-,-,-,TCA,Citrate,acetyl CoA,Lys,-,-	12946	20314.5	16805.5	13651.5	15471.5	15942	18630.5	0.0890773	0.440363	0.583803	0.191969	0.32459	0.198732	1
PM07	G12	Tyr-Phe	N-Source,amino acid,dipeptide,Tyr,Phe,,TCA,succinate,Tyr,-,-,-,TCA,Citrate,acetyl CoA,Phe,-,-	15998	20424.5	18206.5	14993.5	17439.5	19029	20683	0.00471378	0.809668	0.294437	0.027132	0.153809	0.00344338	1
PM07	H01	Tyr-Trp	N-Source,amino acid,dipeptide,Tyr,Trp,,TCA,succinate,Tyr,-,-,-,TCA,Citrate,acetyl CoA,Trp,-,-	14683.5	20578.5	16517	17186.5	16944.5	20396	23777	0.167117	0.495453	0.243417	0.231226	0.211358	0.496994	1
PM07	H02	Tyr-Tyr	N-Source,amino acid,dipeptide,Tyr,Tyr,,TCA,succinate,Tyr,-,-,-,TCA,succinate,Tyr,-,-,-	11588.5	16364.5	15508	12402	14451	15105	15210	0.483621	0.805567	0.954439	0.485135	0.85437	0.982427	1
PM07	H03	Val-Arg	N-Source,amino acid,dipeptide,Val,Arg,,TCA,succinyl CoA,Val,-,-,-,TCA,oxaloglutarate,glutamate,Arg,	19136	28487	22370	16787	20139.5	20663.5	27548.5	0.182948	0.88303	0.491307	0.135211	0.285298	0.261729	1
PM07	H04	Val-Asn	N-Source,amino acid,dipeptide,Val,Asn,,TCA,Succinyl CoA,Val,-,-,-,TCA,oxaloacetate,Asp,Asn,-,-	14126	34137.5	29725	25045.5	30206.5	26618.5	32962.5	0.058032	0.811554	0.581667	0.219143	0.632224	0.301231	1
PM07	H05	Val-Asp	N-Source,amino acid,dipeptide,Val,Asp,,TCA,succinyl CoA,Val,-,-,-,TCA,oxaloacetate,Asp,-,-,-	9141	30867.5	26246.5	22138	27136	23031	30530.5	0.0534021	0.952438	0.516081	0.230095	0.582652	0.217574	1
PM07	H06	Val-Gly	N-Source,amino acid,dipeptide,Val,Gly,,TCA,succinyl CoA,Val,-,-,-,TCA,oxaloacetate,Pyruvate,Gly,-,-	9365	25370.5	22640	16763.5	21670.5	20238.5	26797	0.103082	0.83205	0.596493	0.327846	0.493611	0.354367	1
PM07	H07	Val-His	N-Source,amino acid,dipeptide,Val,His,,TCA,succinyl CoA,Val,-,-,-,TCA,oxaloglutarate,glutamate,His,	13835	25897	19330	13931.5	15372	20909	26930.5	0.10302	0.836587	0.260963	0.0796973	0.127547	0.280921	1
PM07	H08	Val-Ile	N-Source,amino acid,dipeptide,Val,Ile,,TCA,succinyl CoA,Val,-,-,-,TCA,succinyl CoA,Propionyl CoA,Il	13781	22024.5	15971	13631	15600	18195	23355.5	0.191645	0.785686	0.293694	0.226476	0.255616	0.359588	1
PM07	H09	Val-Leu	N-Source,amino acid,dipeptide,Val,Leu,,TCA,succinyl CoA,Val,-,-,-,TCA,Citrate,acetyl CoA,Leu,-,-	12196.5	20868	14732	12670	14881.5	16323	21611.5	0.121634	0.854856	0.255137	0.181188	0.243606	0.250015	1
PM07	H10	Val-Tyr	N-Source,amino acid,dipeptide,Val,Tyr,,TCA,succinyl Co A,Val,,,,TCA,succinate,Tyr,,,	12657	19288.5	16718.5	13263	15726.5	16965	19217.5	0.336695	0.990284	0.705145	0.371599	0.565623	0.703716	1
PM07	H11	Val-Val	N-Source,amino acid,dipeptide,Val,Val,,TCA,succinyl CoA,Val,-,-,-,TCA,succinyl CoA,Val,-,-,-	16291	21843	17898	15560	18008.5	19343	22433	0.259108	0.880594	0.40414	0.267489	0.368786	0.46599	1
PM07	H12	g-Glu-Gly	N-Source,amino acid,dipeptide,Glu-g,Gly,,TCA,oxologlutarate,Glu,-,-,-,TCA,oxaloacetate,Pyruvate,Gly	30593.5	36221	30427.5	25715.5	28562.5	31879.5	42814	0.0267514	0.237257	0.0731831	0.0275086	0.0492952	0.0773446	1
PM08	A01	Background	N-Source,Background,,,,,-,-,-,-,-,-,-,-,-,-,-,-	15598	18964.5	17665.5	16042.5	18523	17232.5	18826	0.228211	0.95353	0.660671	0.334715	0.890829	0.549794	1
PM08	A02	L-Glutamine	N-Source,amino acid,amino acid,Gln,AA,,TCA,oxologlutarate,glutamate,Gln,-,-,-,-,-,-,-,-	45920	47340	42572	37902	43451.5	35673	45474.5	0.774642	0.651251	0.262972	0.0499634	0.381072	0.0688584	1
PM08	A03	Ala-Asp	N-Source,amino acid,dipeptide,Ala,Asp,,TCA,oxaloacetate,Pyruvate,Ala,-,-,TCA,oxaloacetate,Asp,-,-,-	12884.5	36793	30249	27177.5	30784	28850	36394.5	0.00650472	0.902471	0.0478859	0.0125307	0.0187997	0.0385859	1
PM08	A04	Ala-Gln	N-Source,amino acid,dipeptide,Ala,Gln,,TCA,oxaloacetate,Pyruvate,Ala,-,-,TCA,oxaloglutarate,glutama	17471.5	39263	34121	29645	35565	30320.5	39783	0.0117385	0.880324	0.0208662	0.0059432	0.0189825	0.0277662	1
PM08	A05	Ala-Ile	N-Source,amino acid,dipeptide,Ala,Ile,,TCA,oxaloacetate,Pyruvate,Ala,-,-,TCA,succinyl CoA,Propionyl	12722.5	30693.5	24414.5	19213	25245	21998	29257.5	0.0265376	0.467799	0.256295	0.0397743	0.192505	0.0895366	1
PM08	A06	Ala-Met	N-Source,amino acid,dipeptide,Ala,Met,,TCA,oxaloacetate,Pyruvate,Ala,-,-,TCA,succinyl CoA,propanoat	14485	28492.5	22267.5	17422	23831.5	20437.5	27151.5	0.0742933	0.592915	0.299902	0.0733731	0.363188	0.170957	1
PM08	A07	Ala-Val	N-Source,amino acid,dipeptide,Ala,Val,,TCA,oxaloacetate,Pyruvate,Ala,-,-,TCA,succinyl CoA,Val,-,-,-	15815.5	28443.5	24593	21517.5	25147.5	21772.5	28220	0.00158939	0.887711	0.000643993	0.0102463	0.0779672	0.0010209	1
PM08	A08	Asp-Ala	N-Source,amino acid,dipeptide,Asp,Ala,,TCA,oxaloacetate,Asp,-,-,-,TCA,oxaloglutarate,Pyruvate,Ala,-	15550	38343	30280	26330.5	31358.5	27062.5	38052.5	0.00836036	0.936542	0.0602661	0.0320272	0.0382472	0.0472642	1
PM08	A09	Asp-Gln	N-Source,amino acid,dipeptide,Asp,Gln,,TCA,oxaloacetate,Asp,-,-,-,TCA,oxaloglutarate,glutamate,Gln,	17434	45408.5	36744.5	29373	38760.5	31947	44281	0.00295704	0.810986	0.0334404	0.00562034	0.0425746	0.0239757	1
PM08	A10	Asp-Gly	N-Source,amino acid,dipeptide,Asp,Gly,,TCA,oxaloacetate,Asp,-,-,-,TCA,oxaloacetate,Pyruvate,Gly,-,-	12433.5	37104	28693.5	26029	29705	27664.5	38816.5	0.00552559	0.601463	0.0598393	0.0229457	0.0325636	0.0346913	1
PM08	A11	Glu-Ala	N-Source,amino acid,dipeptide,Glu,Ala,,TCA,oxologlutarate,Glu,-,-,-,TCA,oxaloglutarate,Pyruvate,Ala	19536.5	41248	35079.5	34225.5	36465.5	33921	43650.5	0.00230538	0.379824	0.014617	0.0209217	0.00773575	0.0122805	1
PM08	A12	Gly-Asn	N-Source,amino acid,dipeptide,Gly-3,Asn,,TCA,oxaloacetate,Pyruvate,Gly,-,-,TCA,oxaloacetate,Asp,Asn	24011	39711.5	34709	32199.5	34201.5	35096.5	45232.5	0.00444215	0.0779111	0.0217339	0.0279923	0.0143825	0.0365365	1
PM08	B01	Gly-Asp	N-Source,amino acid,dipeptide,Gly,Asp,,TCA,oxaloacetate,Pyruvate,Gly,-,-,TCA,oxaloacetate,Asp,-,-,-	12486.5	35813	28192	26161.5	28250.5	28743.5	38979	0.00485155	0.311222	0.000230662	0.000553075	0.000836037	0.00236313	1
PM08	B02	Gly-Ile	N-Source,amino acid,dipeptide,Gly,Ile,,TCA,oxaloacetate,Pyruvate,Gly,-,-,TCA,succinyl CoA,Propionyl	10391.5	26627.5	20995	16817	22310	19182.5	25723.5	0.000190546	0.747308	0.00177205	0.0072823	0.0091021	0.000922242	1
PM08	B03	His-Ala	N-Source,amino acid,dipeptide,His,Ala,,TCA,oxologlutarate,glutamate,His,-,-,TCA,oxaloglutarate,Pyru	17185	33476	21848	17911.5	23397.5	19943	31378.5	0.00556645	0.671487	0.00225809	0.0451005	0.0112902	0.0031912	1
PM08	B04	His-Glu	N-Source,amino acid,dipeptide,His,Glu,,TCA,oxologlutarate,glutamate,His,-,-,TCA,oxaloglutarate,Glu,	11076	38747	26872	18659.5	27340.5	26234.5	37976	0.000243922	0.892531	0.00145766	0.00048462	0.028944	0.00182906	1
PM08	B05	His-His	N-Source,amino acid,dipeptide,His,His,,TCA,oxologlutarate,glutamate,His,-,-,TCA,oxaloglutarate,glut	12340.5	24924.5	20001.5	10551.5	14613.5	17258.5	21474.5	0.0364407	0.222175	0.565316	0.0742836	0.0915781	0.2658	1
PM08	B06	Ile-Asn	N-Source,amino acid,dipeptide,Ile,Asn,,TCA,succinyl CoA,Propionyl CoA,Ile,-,-,TCA,oxaloacetate,Asp,	10166.5	36429.5	29575.5	19696.5	30908.5	25514	33937.5	0.0151423	0.521515	0.271338	0.0298033	0.357207	0.104302	1
PM08	B07	Ile-Leu	N-Source,amino acid,dipeptide,Ile,Leu,,TCA,succinyl CoA,Propionyl CoA,Ile,-,-,TCA,Citrate,acetyl Co	8985	22701.5	15586	9860.5	17729	14260	21214.5	0.00987317	0.28815	0.0456444	0.0173068	0.066327	0.0484198	1
PM08	B08	Leu-Asn	N-Source,amino acid,dipeptide,Leu,Asn,,TCA,Citrate,acetyl CoA,Leu,-,-,TCA,oxaloacetate,Asp,Asn,-,-	14746.5	35732.5	28797	23790	30282.5	25720.5	34310	9.9788e-06	0.728784	0.0194301	0.0122993	0.136175	0.0022946	1
PM08	B09	Leu-His	N-Source,amino acid,dipeptide,Leu,His,,TCA,Citrate,acetyl CoA,Leu,-,-,TCA,oxaloglutarate,glutamate,	12858	29106.5	19116	12793.5	17572.5	16106.5	26221	0.0110089	0.372397	0.0359646	0.0139218	0.0233227	0.014358	1
PM08	B10	Leu-Pro	N-Source,amino acid,dipeptide,Leu,Pro,,TCA,Citrate,acetyl CoA,Leu,-,-,TCA,oxaloglutarate,glutamate,	9698.5	26460.5	18961	12699	20225	16127.5	23415	0.00277278	0.181181	0.0229413	0.0105165	0.064327	0.0161896	1
PM08	B11	Leu-Tyr	N-Source,amino acid,dipeptide,Leu,Tyr,,TCA,Citrate,acetyl CoA,Leu,-,-,TCA,succinate,Tyr,-,-,-	12447	21435.5	17469	14850.5	17718	16500	19216	0.174734	0.598674	0.625608	0.260506	0.709451	0.458063	1
PM08	B12	Lys-Asp	N-Source,amino acid,dipeptide,Lys,Asp,,TCA,Citrate,acetyl CoA,Lys,-,-,TCA,oxaloacetate,Asp,-,-,-	15782	34165	26836	24750.5	27374.5	29194.5	37591.5	0.0011298	0.296732	0.00400514	0.00315025	0.0168079	0.00644023	1
PM08	C01	Lys-Gly	N-Source,amino acid,dipeptide,Lys,Gly,,TCA,Citrate,acetyl CoA,Lys,-,-,TCA,oxaloacetate,Pyruvate,Gly	12919.5	27387.5	22050	20357	21576.5	21946.5	27359.5	0.000858819	0.947744	0.0220048	0.00842361	0.0106435	0.0273983	1
PM08	C02	Lys-Met	N-Source,amino acid,dipeptide,Lys,Met,,TCA,Citrate,acetyl CoA,Lys,-,-,TCA,succinyl CoA,propanoate m	8664.5	15134	10778	8105	12844	10218	13209.5	0.0834419	0.265009	0.196877	0.0630568	0.785727	0.260325	1
PM08	C03	Met-Thr	N-Source,amino acid,dipeptide,Met,Thr,,TCA,succinyl CoA,propanoate metabolism,gly ser thr metabloli	9020	23176	17293.5	11458	19525	16572	23619	0.000333436	0.81329	0.00282219	0.013642	0.0261512	0.020141	1
PM08	C04	Met-Tyr	N-Source,amino acid,dipeptide,Met,Tyr,,TCA,succinyl CoA,propanoate metabolism,gly ser thr metabloli	7225	16544	10045.5	8352.5	10716.5	10548.5	15947	0.00611493	0.49649	0.0153292	0.0236691	0.0225993	0.065297	1
PM08	C05	Phe-Asp	N-Source,amino acid,dipeptide,Phe,Asp,,TCA,Citrate,acetyl CoA,Phe,-,-,TCA,oxaloacetate,Asp,-,-,-	8048.5	30042.5	21260	17523.5	27193	22528	31156.5	0.00108444	0.738395	0.00926204	0.00420973	0.408269	0.0261665	1
PM08	C06	Phe-Glu	N-Source,amino acid,dipeptide,Phe,Glu,,TCA,Citrate,acetyl CoA,Phe,-,-,TCA,oxaloglutarate,Glu,-,-,-	7667.5	28939	22855	18730.5	25810	22402	29332.5	0.000197266	0.922732	0.00190771	0.0303438	0.00660209	0.0241558	1
PM08	C07	Gln-Glu	N-Source,amino acid,dipeptide,Gln,Glu,,TCA,oxologlutarate,glutamate,Gln,-,-,TCA,oxaloglutarate,Glu,	18161	39056	29029.5	18456.5	29660.5	26057	35799.5	0.00465495	0.251711	0.000660235	0.000540697	0.0272797	0.0104083	1
PM08	C08	Phe-Met	N-Source,amino acid,dipeptide,Phe,Met,,TCA,Citrate,acetyl CoA,Phe,-,-,TCA,succinyl CoA,propanoate m	10147	19038	13249.5	10081.5	15598.5	14056.5	18310.5	0.0776998	0.786118	0.0793649	0.0324004	0.363827	0.099565	1
PM08	C09	Phe-Tyr	N-Source,amino acid,dipeptide,Phe,Tyr,,TCA,Citrate,acetyl CoA,Phe,-,-,TCA,succinate,Tyr,-,-,-	9715.5	17852.5	12401	9960.5	13766.5	13233	17262	0.0576604	0.797243	0.0429977	0.0616306	0.17805	0.0471494	1
PM08	C10	Phe-Val	N-Source,amino acid,dipeptide,Phe,Val,,TCA,Citrate,acetyl CoA,Phe,-,-,TCA,succinyl CoA,Val,-,-,-	11391	19540	15157.5	10756.5	16652.5	13885.5	18123	0.00668806	0.173198	0.0358224	0.00930246	0.117655	0.0348676	1
PM08	C11	Pro-Arg	N-Source,amino acid,dipeptide,Pro,Arg,,TCA,oxologlutarate,glutamate,Pro,-,-,TCA,oxaloglutarate,glut	19435	26588.5	24844.5	17649	22773	20144.5	22979	0.109154	0.397912	0.421305	0.0504492	0.949882	0.150165	1
PM08	C12	Pro-Asn	N-Source,amino acid,dipeptide,Pro,Asn,,TCA,oxologlutarate,glutamate,Pro,-,-,TCA,oxaloacetate,Asp,As	17322.5	42703.5	36360.5	34330.5	38199	36518	44720	0.00601758	0.766145	0.0459367	0.0794574	0.115618	0.0259307	1
PM08	D01	Pro-Glu	N-Source,amino acid,dipeptide,Pro,Glu,,TCA,oxologlutarate,glutamate,Pro,-,-,TCA,oxaloglutarate,Glu,	12607	36015	27592	25403	31297.5	27710	38166	0.00734268	0.669313	0.0443928	0.0438497	0.101454	0.0464778	1
PM08	D02	Pro-lle	N-Source,amino acid,dipeptide,Pro,Ile,,TCA,oxologlutarate,glutamate,Pro,-,-,TCA,succinyl CoA,Propio	9595	33453.5	26533.5	23308	30599.5	26930	33214.5	0.000185399	0.95064	0.0665704	0.0141803	0.0998909	0.0125985	1
PM08	D03	Pro-Lys	N-Source,amino acid,dipeptide,Pro,Lys,,TCA,oxologlutarate,glutamate,Pro,-,-,TCA,Citrate,acetyl CoA,	9588	15102.5	12686	8327.5	12766.5	11841	13959	0.0616219	0.650034	0.352309	0.0498858	0.543682	0.0631427	1
PM08	D04	Pro-Ser	N-Source,amino acid,dipeptide,Pro,Ser,,TCA,oxologlutarate,glutamate,Pro,-,-,TCA,oxaloacetate,Pyruva	8139.5	34794	23498.5	16902	27292.5	22966	33973	0.00100727	0.900725	0.035497	0.0241044	0.0632603	0.00480947	1
PM08	D05	Pro-Trp	N-Source,amino acid,dipeptide,Pro,Trp,,TCA,oxologlutarate,glutamate,Pro,-,-,TCA,Citrate,acetyl CoA,	44677	66744.5	53034.5	48204	60119.5	63802.5	71401	0.157364	0.117809	0.0804809	0.0351191	0.0232764	0.0691156	1
PM08	D06	Pro-Val	N-Source,amino acid,dipeptide,Pro,Val,,TCA,oxologlutarate,glutamate,Pro,-,-,TCA,succinyl CoA,Val,-,	10231.5	29954	19358.5	18643.5	24580.5	22896.5	29490.5	0.00187196	0.891703	0.0421009	0.081746	0.013414	0.0208767	1
PM08	D07	Ser-Asn	N-Source,amino acid,dipeptide,Ser,Asn,,TCA,oxaloacetate,Pyruvate,Ser,-,-,TCA,oxaloacetate,Asp,Asn,-	21775.5	40412	34923.5	27318.5	35688.5	29073	41177.5	0.00360359	0.900986	0.104082	0.0139044	0.0651562	0.0142224	1
PM08	D08	Ser-Asp	N-Source,amino acid,dipeptide,Ser,Asp,,TCA,oxaloacetate,Pyruvate,Ser,-,-,TCA,oxaloacetate,Asp,-,-,-	8293	38278.5	26274	20076	29483.5	26056.5	38022	0.00143174	0.965032	0.025607	0.00531481	0.0397817	0.0106763	1
PM08	D09	Ser-Gln	N-Source,amino acid,dipeptide,Ser,Gln,,TCA,oxaloacetate,Pyruvate,Ser,-,-,TCA,oxaloglutarate,glutama	17007	44426.5	32974	27922.5	37589.5	31781.5	46205.5	0.00755901	0.819695	0.0861702	0.0302525	0.0788788	0.0341138	1
PM08	D10	Ser-Glu	N-Source,amino acid,dipeptide,Ser,Glu,,TCA,oxaloacetate,Pyruvate,Ser,-,-,TCA,oxaloglutarate,Glu,-,-	12082.5	39216.5	29257.5	27427	32809.5	30705.5	40731.5	0.00656395	0.834264	0.0688929	0.0357348	0.078936	0.0606341	1
PM08	D11	Thr-Asp	N-Source,amino acid,dipeptide,Thr,Asp,,TCA,oxaloacetate,Pyruvate,Thr,-,-,TCA,oxaloacetate,Asp,-,-,-	9563.5	36284	26209.5	22231.5	28557.5	26182.5	36144	0.00238203	0.98026	0.0221391	0.00986016	0.0288637	0.0177733	1
PM08	D12	Thr-Gln	N-Source,amino acid,dipeptide,Thr,Gln,,TCA,oxaloacetate,Pyruvate,Thr,-,-,TCA,oxaloglutarate,glutama	20355	42790.5	36432	32279	39469.5	35863.5	43743	0.00566979	0.872946	0.117466	0.0631852	0.164322	0.0797605	1
PM08	E01	Thr-Phe	N-Source,amino acid,dipeptide,Thr,Phe,,TCA,oxaloacetate,Pyruvate,Thr,-,-,TCA,Citrate,acetyl CoA,Phe	14803	18272.5	23148	20539.5	25496.5	23609.5	27904.5	0.00623941	0.405883	0.057203	0.0240117	0.15908	0.0807783	1
PM08	E02	Thr-Ser	N-Source,amino acid,dipeptide,Thr,Ser,,TCA,oxaloacetate,Pyruvate,Thr,-,-,TCA,oxaloacetate,Pyruvate,	11550.5	31024	27166	19977	28670.5	24697	29371.5	0.00112772	0.753762	0.154586	0.0734675	0.481486	0.0783902	1
PM08	E03	Trp-Val	N-Source,amino acid,dipeptide,Trp,Val,,TCA,Citrate,acetyl CoA,Trp,-,-,TCA,succinyl CoA,Val,-,-,-	8152	18660.5	12854	9028.5	13749.5	13304.5	19719.5	0.0278474	0.587109	0.037879	0.0224493	0.0718745	0.038722	1
PM08	E04	Tyr-Ile	N-Source,amino acid,dipeptide,Tyr,Ile,,TCA,succinate,Tyr,-,-,-,TCA,succinyl CoA,Propionyl CoA,Ile,-	9423.5	18842	12158	9590	12570.5	12331	18111.5	0.00513374	0.383899	0.0106858	0.0335788	0.0132765	0.00107118	1
PM08	E05	Tyr-Val	N-Source,amino acid,dipeptide,Tyr,Val,,TCA,succinate,Tyr,-,-,-,TCA,succinyl CoA,Val,-,-,-	8624.5	15770	10662.5	6957.5	11767	10458.5	15916	0.055379	0.93644	0.0211224	0.0305183	0.0471653	0.0259501	1
PM08	E06	Val-Ala	N-Source,amino acid,dipeptide,Val,Ala,,TCA,succinyl CoA,Val,-,-,-,TCA,oxaloglutarate,Pyruvate,Ala,-	9113	26618.5	19667	16135	20860.5	18318.5	25339	0.00268068	0.621925	0.00768144	0.0292263	0.0296185	0.00364784	1
PM08	E07	Val-Gln	N-Source,amino acid,dipeptide,Val,Gln,,TCA,succinyl CoA,Val,-,-,-,TCA,oxaloglutarate,glutamate,Gln,	10485.5	31154	25770	18920.5	29196.5	23762	29532	0.0229868	0.728484	0.257511	0.0720565	0.90442	0.139766	1
PM08	E08	Val-Glu	N-Source,amino acid,dipeptide,Val,Glu,,TCA,succinyl CoA,Val,-,-,-,TCA,oxaloglutarate,Glu,-,-,-	7791	31295.5	27749	21467.5	29944.5	25359.5	31502.5	0.00454786	0.963881	0.111489	0.0375043	0.376647	0.0735488	1
PM08	E09	Val-Lys	N-Source,amino acid,dipeptide,Val,Lys,,TCA,succinyl CoA,Val,-,-,-,TCA,Citrate,acetyl CoA,Lys,-,-	10176.5	16376	12751.5	10531	13740.5	12377	15852.5	0.041306	0.698762	0.062908	0.0639029	0.165144	0.0548958	1
PM08	E10	Val-Met	N-Source,amino acid,dipeptide,Val,Met,,TCA,succinyl CoA,Val,-,-,-,TCA,succinyl CoA,propanoate metab	11024	18141	13066	9973.5	15028	13162.5	16916	0.169552	0.69572	0.215386	0.107036	0.515264	0.268269	1
PM08	E11	Val-Phe	N-Source,amino acid,dipeptide,Val,Phe,,TCA,succinyl CoA,Val,-,-,-,TCA,Citrate,acetyl CoA,Phe,-,-	10446.5	17262.5	12144.5	9733	13564.5	12627	15577	0.125163	0.515799	0.18232	0.0571448	0.358086	0.186794	1
PM08	E12	Val-Pro	N-Source,amino acid,dipeptide,Val,Pro,,TCA,succinyl CoA,Val,-,-,-,TCA,oxaloglutarate,glutamate,Pro,	14006.5	30872.5	24879.5	21154	26307.5	24043.5	32792	0.00025008	0.310149	0.00675904	0.0318891	0.00348467	0.00155439	1
PM08	F01	Val-Ser	N-Source,amino acid,dipeptide,Val,Ser,,TCA,succinyl CoA,Val,-,-,-,TCA,oxaloacetate,Pyruvate,Ser,-,-	13163	27806	25088.5	21863	26472.5	24292.5	29774	0.00520955	0.277932	0.058253	0.0196717	0.143126	0.0295956	1
PM08	F02	b-Ala-Ala	N-Source,amino acid,dipeptide,Ala-b,Ala,,TCA,oxaloacetate,Pyruvate,Ala,-,-,TCA,oxaloglutarate,Pyruv	8948	20597.5	16793	13689	18643.5	15498	19039.5	0.014391	0.466626	0.0786296	0.0386549	0.643108	0.0352806	1
PM08	F03	b-Ala-Gly	N-Source,amino acid,dipeptide,Ala-b,Gly,,TCA,oxaloacetate,Pyruvate,Ala,-,-,TCA,oxaloacetate,Pyruvat	7132.5	11929.5	8991	7294.5	10733.5	10161.5	12117.5	0.200693	0.951835	0.235736	0.16907	0.501793	0.443633	1
PM08	F04	b-Ala-His	N-Source,amino acid,dipeptide,Ala-b,His,,TCA,oxaloacetate,Pyruvate,Ala,-,-,TCA,oxaloglutarate,gluta	10646.5	17156.5	11440.5	7115.5	12383	11731.5	16761	0.0682133	0.875035	0.0368947	0.0201934	0.156982	0.0664174	1
PM08	F05	Met-b-Ala	N-Source,amino acid,dipeptide,Met,Ala-b,,TCA,succinyl CoA,propanoate metabolism,gly ser thr metablo	6601	16329.5	11548.5	7745	14201	12043.5	15557	0.0739278	0.806909	0.214618	0.0877473	0.67758	0.242368	1
PM08	F06	b-Ala-Phe	N-Source,amino acid,dipeptide,Ala-b,Phe,,TCA,oxaloacetate,Pyruvate,Ala,-,-,TCA,Citrate,acetyl CoA,P	7488.5	17073	14538.5	9087	14869.5	14672	17213.5	0.0485162	0.942952	0.310804	0.0567793	0.145899	0.24071	1
PM08	F07	D-Ala-D-Ala	N-Source,amino acid,dipeptide,Ala-D,Ala-D,,TCA,oxaloacetate,Pyruvate,Ala,-,-,TCA,oxaloglutarate,Pyr	10535.5	17196.5	11718	8774.5	12962	12762.5	16471	0.168018	0.83878	0.203984	0.0979502	0.420127	0.285668	1
PM08	F08	D-Ala-Gly	N-Source,amino acid,dipeptide,Ala-D,Gly,,TCA,oxaloacetate,Pyruvate,Ala,-,-,TCA,oxaloacetate,Pyruvat	13426.5	26506	16422.5	12011.5	17422.5	16953	23822.5	0.0760325	0.613437	0.108497	0.0604519	0.168587	0.122791	1
PM08	F09	D-Ala-Leu	N-Source,amino acid,dipeptide,Tyr,Leu,,TCA,,,,-,-,TCA,Citrate,acetyl CoA,Leu,-,-	11514	27200	19245	11565	20912.5	15240	22335.5	0.0327468	0.343738	0.292758	0.0565978	0.62662	0.0763086	1
PM08	F10	D-Leu-D-Leu	N-Source,amino acid,dipeptide,Leu-D,Leu-D,,TCA,Citrate,acetyl CoA,Leu,,,TCA,Citrate,acetyl CoA,Leu,	10453.5	14264	12144.5	9961	13413	12151	14167.5	0.307962	0.973361	0.513999	0.198635	0.813127	0.504815	1
PM08	F11	D-Leu-Gly	N-Source,amino acid,dipeptide,Leu-D,Gly,,TCA,Citrate,acetyl CoA,Leu,-,-,TCA,oxaloacetate,Pyruvate,G	12571.5	20578.5	15605	11702	15362.5	14713	18821.5	0.0604191	0.518573	0.164758	0.0389183	0.205379	0.0959229	1
PM08	F12	D-Leu-Tyr	N-Source,amino acid,dipeptide,Leu-D,Tyr,,TCA,Citrate,acetyl CoA,Leu,,,TCA,succinate,Tyr,,,	17496.5	18077.5	16005	14657.5	17161.5	16199.5	17535.5	0.989874	0.364997	0.0542812	0.0131774	0.619154	0.0736064	1
PM08	G01	g-Glu-Gly	N-Source,amino acid,dipeptide,Glu-g,Gly,,TCA,oxologlutarate,Glu,-,-,-,TCA,oxaloacetate,Pyruvate,Gly	23990.5	29149.5	25350.5	21575	27567	25133.5	32204.5	0.0124324	0.418031	0.032787	0.0441604	0.119686	0.031024	1
PM08	G02	g-D-Glu-Gly	N-Source,amino acid,dipeptide,Glu-g-D,Gly,,TCA,oxologlutarate,Glu,-,-,-,TCA,oxaloacetate,Pyruvate,G	15813.5	25358	21258	14976	21702	17677.5	23332.5	0.0280205	0.543101	0.142089	0.050132	0.484407	0.0542517	1
PM08	G03	Gly-D-Ala	N-Source,amino acid,dipeptide,Gly,Ala-D,,TCA,oxaloacetate,Pyruvate,Gly,-,-,TCA,oxaloglutarate,Pyruv	8216	15456	10713	8619	12814.5	11630.5	15231	0.177718	0.966797	0.27672	0.20013	0.561673	0.380457	1
PM08	G04	Gly-D-Asp	N-Source,amino acid,dipeptide,Gly,Asp-D,,TCA,oxaloacetate,Pyruvate,Gly,-,-,TCA,oxaloacetate,Asp,-,-	8260	11132	9689.5	7684	11203	10258	11018	0.424719	0.971051	0.625453	0.363272	0.953054	0.815686	1
PM08	G05	Gly-D-Ser	N-Source,amino acid,dipeptide,Gly,Ser-D,,TCA,oxaloacetate,Pyruvate,Gly,-,-,TCA,oxaloacetate,Pyruvat	8443.5	12766.5	10203.5	7991.5	12387	10275	12363	0.46775	0.932638	0.61985	0.39381	0.995973	0.648276	1
PM08	G06	Gly-D-Thr	N-Source,amino acid,dipeptide,Gly,Thr-D,,TCA,oxaloacetate,Pyruvate,Gly,-,-,TCA,oxaloacetate,Pyruvat	7050.5	10568.5	8069.5	6498.5	9889.5	8377	10229	0.520246	0.931801	0.575088	0.402311	0.932741	0.647557	1
PM08	G07	Gly-D-Val	N-Source,amino acid,dipeptide,Gly,Val-D,,TCA,oxaloacetate,Pyruvate,Gly,-,-,TCA,succinyl CoA,Val,-,-	7006.5	10091.5	8071.5	6628.5	9912.5	8273	9853.5	0.447701	0.931302	0.504137	0.350595	0.982879	0.585348	1
PM08	G08	Leu-b-Ala	N-Source,amino acid,dipeptide,Leu,Ala-b,,TCA,Citrate,acetyl CoA,Leu,-,-,TCA,oxaloglutarate,Pyruvate	7993	15217.5	10108	7942.5	12379	10371.5	13763	0.177384	0.600358	0.213475	0.121967	0.674146	0.256195	1
PM08	G09	Leu-D-Leu	N-Source,amino acid,dipeptide,Leu,Leu-D,,TCA,Citrate,acetyl CoA,Leu,-,-,TCA,Citrate,acetyl CoA,Leu,	9162.5	13160	10475	8475.5	12119.5	11059.5	12789.5	0.360337	0.91997	0.475082	0.258352	0.841582	0.58995	1
PM08	G10	Phe-b-Ala	N-Source,amino acid,dipeptide,Phe,Ala-b,,TCA,Citrate,acetyl CoA,Phe,-,-,TCA,oxaloglutarate,Pyruvate	9857	17424.5	12896.5	10287	15172	13527	16433.5	0.154476	0.785263	0.224987	0.126444	0.728853	0.428846	1
PM08	G11	Ala-Ala-Ala	N-Source,amino acid,tripeptide,Ala,Tripeptide,,TCA,oxaloacetate,Pyruvate,Ala,-,-,TCA,oxaloglutarate	31788	35388.5	33301	28077	35208.5	29785.5	33861	0.392594	0.785536	0.820556	0.186915	0.693636	0.23578	1
PM08	G12	D-Ala-Gly-Gly	N-Source,amino acid,tripeptide,Ala-D,Gly,,TCA,oxaloacetate,Pyruvate,Ala,-,-,TCA,oxaloacetate,Pyruva	19585	17399	15718	13973	17007	16601	17876	0.474482	0.82454	0.24633	0.151167	0.658158	0.509567	1
PM08	H01	Gly-Gly-Ala	N-Source,amino acid,tripeptide,Gly,Ala,,TCA,oxaloacetate,Pyruvate,Gly,-,-,TCA,oxaloglutarate,Pyruva	30334.5	30129	25185.5	25179.5	26525.5	28672.5	34491.5	0.406896	0.58708	0.177947	0.163445	0.166285	0.307939	1
PM08	H02	Gly-Gly-D-Leu	N-Source,amino acid,tripeptide,Gly,Leu-D,,TCA,oxaloacetate,Pyruvate,Gly,-,-,TCA,Citrate,acetyl CoA,	14315.5	15600	14369	11432	15348	14775.5	15035.5	0.862964	0.918877	0.862215	0.465217	0.931479	0.949001	1
PM08	H03	Gly-Gly-Gly	N-Source,amino acid,tripeptide,Gly,Tripeptide,,TCA,oxaloacetate,Pyruvate,Gly,-,-,TCA,oxaloacetate,P	20585.5	22838.5	17819.5	11686	17869	18417	23160	0.683667	0.967308	0.371436	0.155525	0.375471	0.444307	1
PM08	H04	Gly-Gly-Ile	N-Source,amino acid,tripeptide,Gly,Ile,,TCA,oxaloacetate,Pyruvate,Gly,-,-,TCA,succinyl CoA,Propiony	24128.5	27041	24721.5	19839.5	24913.5	23220.5	26395	0.710851	0.927576	0.782775	0.380044	0.789312	0.625545	1
PM08	H05	Gly-Gly-Leu	N-Source,amino acid,tripeptide,Gly,Leu,,TCA,oxaloacetate,Pyruvate,Gly,-,-,TCA,Citrate,acetyl CoA,Le	23192	27167.5	22105.5	15815.5	21221	20137.5	23737	0.943343	0.693174	0.804353	0.327791	0.68275	0.587903	1
PM08	H06	Gly-Gly-Phe	N-Source,amino acid,tripeptide,Gly,Phe,,TCA,oxaloacetate,Pyruvate,Gly,-,-,TCA,Citrate,acetyl CoA,Ph	20058.5	23264	20030	17188.5	18307	18319	21193	0.901619	0.823643	0.88765	0.636088	0.721483	0.687567	1
PM08	H07	Val-Tyr-Val	N-Source,amino acid,tripeptide,Val,Val,,TCA,succinyl CoA,Val,-,-,-,TCA,succinyl CoA,Val,-,-,-	13958	19044	14073	10633	15878.5	14281.5	17444	0.550312	0.792308	0.521103	0.28146	0.741727	0.558825	1
PM08	H08	Gly-Phe-Phe	N-Source,amino acid,tripeptide,Gly,Phe,,TCA,oxaloacetate,Pyruvate,Gly,-,-,TCA,Citrate,acetyl CoA,Ph	24364.5	23972.5	18455	18794.5	19978.5	20979	30041	0.576643	0.552961	0.227474	0.166691	0.281051	0.292679	1
PM08	H09	Leu-Gly-Gly	N-Source,amino acid,tripeptide,Leu,Gly,,TCA,Citrate,acetyl CoA,Leu,-,-,TCA,oxaloacetate,Pyruvate,Gl	23078.5	27830.5	21641	12953.5	20127	19323	22987	0.986546	0.477127	0.79656	0.179027	0.614287	0.533124	1
PM08	H10	Leu-Leu-Leu	N-Source,amino acid,tripeptide,Leu,Tripeptide,,TCA,Citrate,acetyl CoA,Leu,-,-,TCA,Citrate,acetyl Co	13601	19896	13962	10873.5	16545	15278	19553.5	0.477732	0.963273	0.43465	0.276861	0.663441	0.542067	1
PM08	H11	Phe-Gly-Gly	N-Source,amino acid,tripeptide,Phe,Gly,,TCA,Citrate,acetyl CoA,Phe,-,-,TCA,oxaloacetate,Pyruvate,Gl	26238	28722.5	23207	20914.5	23115	23222.5	25804	0.93986	0.697481	0.676897	0.447335	0.666398	0.674883	1
PM08	H12	Tyr-Gly-Gly	N-Source,amino acid,tripeptide,Tyr,Gly,,TCA,succinate,Tyr,-,-,-,TCA,oxaloacetate,Pyruvate,Gly,-,-	22950	26626.5	23788.5	22834.5	24558	26487.5	29189.5	0.226273	0.514672	0.233093	0.24571	0.292225	0.552719	1
PM09	A01	1% NaCl	osmotic sensitivity, NaCl	91265	94739	97766.5	92867.5	94903	97740.5	99127.5	0.00259	0.05432	0.0301942	0.00221796	0.12788	0.0584921	1
PM09	A02	2% NaCl	osmotic sensitivity, NaCl	83301	94622	93093	89285.5	95722.5	95912	93251.5	0.160028	0.771105	0.972784	0.421859	0.593002	0.58361	1
PM09	A03	3% NaCl	osmotic sensitivity, NaCl	80868	92316	92093	84847.5	89439.5	90765	93873	0.096403	0.768447	0.689466	0.134586	0.416651	0.482278	1
PM09	A04	4% NaCl	osmotic sensitivity, NaCl	84895	96962	93339	85787.5	91875	89467.5	99678.5	0.0252386	0.288846	0.0475675	0.0437634	0.0206354	0.0166038	1
PM09	A05	5% NaCl	osmotic sensitivity, NaCl	84564	96592	91806	86880.5	90782	93141.5	97378.5	0.0084474	0.72307	0.209708	0.0333169	0.153191	0.0246058	1
PM09	A06	5.5% NaCl	osmotic sensitivity, NaCl	82539	93603	91099.5	79142	84645	85659.5	94795	0.0236126	0.537746	0.543554	0.0167663	0.0274567	0.0464756	1
PM09	A07	6% NaCl	osmotic sensitivity, NaCl	85153.5	94673.5	93236	81793	86353	87768.5	95710.5	0.123596	0.742028	0.376151	0.158411	0.0500025	0.104308	1
PM09	A08	6.5% NaCl	osmotic sensitivity, NaCl	78238	88245	91115.5	83246	85865.5	88609	89712	0.0770252	0.796322	0.712159	0.178641	0.369179	0.807377	1
PM09	A09	7% NaCl	osmotic sensitivity, NaCl	80989	78072	85680.5	77029	84241.5	81972	88031.5	0.365097	0.253636	0.801431	0.216879	0.594271	0.419576	1
PM09	A10	8% NaCl	osmotic sensitivity, NaCl	72243.5	86643	84067.5	69407	77238	75772	89400	0.0855224	0.505551	0.306535	0.0846856	0.151431	0.101866	1
PM09	A11	9% NaCl	osmotic sensitivity, NaCl	75230	84970	82693.5	76591	74463	82835	89303.5	0.161042	0.0214625	0.00215047	0.00270916	0.010932	0.273841	1
PM09	A12	10% NaCl	osmotic sensitivity, NaCl	73320.5	83367	79024.5	61097	58892.5	72762.5	90268.5	0.00921169	0.0499894	0.00187233	0.0259254	0.14246	0.0234328	1
PM09	B01	6% NaCl	osmotic sensitivity, NaCl control	82146.5	91957.5	89961.5	84100	84850	89333.5	91217	0.0594151	0.818965	0.588235	0.0857966	0.172364	0.460954	1
PM09	B02	6% NaCl + Betaine	osmolyte, betaine	80175	92594	91050.5	78961	88020	87024	89618.5	0.117322	0.468721	0.708294	0.160072	0.729702	0.678811	1
PM09	B03	6% NaCl + N-N Dimethyl glycine	osmolyte, dimethylglycine	77785	90618.5	88740	81529	84995	88602.5	90358	0.0685898	0.894071	0.310287	0.0211609	0.167632	0.65867	1
PM09	B04	6% NaCl + Sarcosine	osmolyte, sarcosine	76443	90146.5	87829.5	85467.5	86746	88593	91961	0.0160325	0.586101	0.231786	0.075241	0.198228	0.421767	1
PM09	B05	6% NaCl + Dimethyl sulphonyl propionate	osmolyte, dimethyl sulphonyl propionate	79784.5	94337	91661.5	81896.5	85486.5	89551	92564	0.0216837	0.342715	0.655942	0.0109586	0.260964	0.460396	1
PM09	B06	6% NaCl + MOPS	osmolyte, MOPS	76319	92032.5	87814.5	85768	87416	88618.5	91984	0.0398384	0.912651	0.0182598	0.00471572	0.0472742	0.0133433	1
PM09	B07	6% NaCl + Ectoine	osmolyte, ectoine	80709.5	91236.5	89835.5	83184	86035	86772	91057.5	0.0519241	0.925085	0.538245	0.0815806	0.154001	0.123908	1
PM09	B08	6% NaCl + Choline	osmolyte, choline	75647	91255	90313.5	85979	87698	90403	90238	0.148514	0.739325	0.974329	0.278039	0.539261	0.959353	1
PM09	B09	6% NaCl + Phosphorylcholine	osmolyte, phosphorylcholine	77138	88202	87790.5	83851	85571	86983	89851.5	0.0103026	0.414435	0.362896	0.0464562	0.132882	0.3986	1
PM09	B10	6% NaCl + Creatine	osmolyte, creatine	78118	86650.5	86204	82178.5	83882	86905	87404	0.00488072	0.232623	0.188076	0.0666092	0.352358	0.816422	1
PM09	B11	6% NaCl + Creatinine	osmolyte, creatinine	72988	84945	84391.5	80863.5	81421	84882.5	87391	0.0398409	0.635652	0.489176	0.25526	0.361914	0.685769	1
PM09	B12	6% NaCl + L-Carnitine	osmolyte, carnitine	82797.5	91503.5	90807.5	85870	84002.5	90392	91541	0.0897216	0.989394	0.717804	0.127125	0.11839	0.808531	1
PM09	C01	6% NaCl + KCl	osmolyte, KCl	83205	91876.5	90951.5	85120	88130.5	86343.5	91783	0.0597498	0.941035	0.551683	0.0323035	0.325425	0.256894	1
PM09	C02	6% NaCl + L-Proline	osmolyte, proline	77189	82168.5	84443.5	79028	82271.5	85820	87666.5	0.109823	0.189325	0.221171	0.173002	0.251339	0.639207	1
PM09	C03	6% NaCl + N-Acetyl-L-glutamine	osmolyte, acetyl glutamine	76420.5	88366	87094.5	81021.5	82902	83550.5	87961.5	0.0531373	0.863937	0.704918	0.122964	0.268805	0.317187	1
PM09	C04	6% NaCl + ?-Glutamic acid	osmolyte, b-glutamate	76603.5	86299.5	89118.5	82915.5	79461.5	85486	84207	0.113456	0.667918	0.0958585	0.705969	0.549856	0.549975	1
PM09	C05	6% NaCl + Amino-N-butyric acid	osmolyte, g-amino butyric acid	76390.5	89593	88213	81694.5	84638.5	86392	88906.5	0.0237711	0.461292	0.382511	0.0340041	0.228191	0.0503113	1
PM09	C06	6% NaCl + Glutathione	osmolyte, glutathione	80534	91454.5	90101.5	85782.5	87138	90324.5	86217.5	0.084964	0.110452	0.150421	0.870431	0.719445	0.298142	1
PM09	C07	6% NaCl + Glycerol	osmolyte, glycerol	75198.5	83243.5	88610	81845	80969	90212	85957	0.153094	0.617326	0.626883	0.483874	0.466431	0.474673	1
PM09	C08	6% NaCl + Trehalose	osmolyte, trehalose	75313	87559	89933	81271.5	81238	90448.5	85558.5	0.105981	0.620312	0.235536	0.43251	0.542456	0.235549	1
PM09	C09	6% NaCl + Trimethylamine-N-oxide	osmolyte, trimethylamine-N-oxide	76896	85719	86958	82687.5	84076.5	88383.5	86300.5	0.120046	0.858902	0.847949	0.286919	0.447987	0.661664	1
PM09	C10	6% NaCl + Trimethylamine	osmolyte, trimethylamine	75464.5	81321.5	85033	80084.5	80481.5	84512.5	86311.5	0.0741737	0.250667	0.540931	0.135327	0.156557	0.564648	1
PM09	C11	6% NaCl + Octopine	osmolyte, octopine	70570.5	84019	83509	77514.5	79713.5	84234	84486.5	0.0676346	0.93652	0.867034	0.40946	0.435523	0.972658	1
PM09	C12	6% NaCl + Trigonelline	osmolyte, trigonelline	81010	91697.5	89245	83954.5	83397.5	90739	90206.5	0.0799883	0.39703	0.398915	0.0205832	0.151427	0.822665	1
PM09	D01	3% Potassium Chloride	osmotic sensitivity, KCl	85344	99222	95736.5	87278.5	96620.5	98027.5	96412	0.106165	0.46471	0.850358	0.270453	0.955995	0.654197	1
PM09	D02	4% Potassium Chloride	osmotic sensitivity, KCl	77924.5	93809	93419.5	83429	90562.5	90789.5	91550.5	0.0206193	0.0563776	0.0584159	0.0742701	0.688289	0.345732	1
PM09	D03	5% Potassium Chloride	osmotic sensitivity, KCl	73032.5	86376	91443.5	78793.5	87011.5	85482	91843.5	0.0507832	0.0812885	0.85641	0.101568	0.287893	0.29433	1
PM09	D04	6% Potassium Chloride	osmotic sensitivity, KCl	77295	93242.5	87820.5	81215	82638.5	89741.5	91484	0.046883	0.271502	0.0617447	0.0385977	0.00887249	0.503396	1
PM09	D05	2% Sodium Sulfate	osmotic sensitivity, Na2SO4	57462	92494.5	94332	89525	91092.5	92623.5	91348	0.00126878	0.457954	0.262955	0.266613	0.946338	0.400873	1
PM09	D06	3% Sodium Sulfate	osmotic sensitivity, Na2SO4	62680	95922	96592	90018	93326	95111	96934.5	0.00400807	0.695583	0.8898	0.266767	0.337734	0.51941	1
PM09	D07	4% Sodium Sulfate	osmotic sensitivity, Na2SO4	72270	97062.5	96172.5	85217	92440	92227.5	92027.5	0.154571	0.177121	0.304464	0.160291	0.879153	0.954044	1
PM09	D08	5% Sodium Sulfate	osmotic sensitivity, Na2SO4	74388	92935	94611.5	82390	90000	90843	93805.5	0.0893211	0.647906	0.436482	0.0214279	0.291225	0.338671	1
PM09	D09	5% Ethylene Glycol	osmotic sensitivity, ethylene glycol	57529	97076	97313	91371	92890.5	94876.5	94766.5	0.00114985	0.23761	0.278242	0.213347	0.263573	0.972241	1
PM09	D10	10% Ethylene Glycol	osmotic sensitivity, ethylene glycol	56465	91700.5	92961	86625	91229	93602	96271.5	0.00681522	0.0831134	0.211276	0.0669974	0.141191	0.312989	1
PM09	D11	15% Ethylene Glycol	osmotic sensitivity, ethylene glycol	73316	94343.5	93087	84305	91423.5	91499	94578.5	0.00244156	0.8884	0.0274393	0.00148667	0.0509383	0.0224305	1
PM09	D12	20% Ethylene Glycol	osmotic sensitivity, ethylene glycol	83350	95923.5	97068.5	87178.5	93065	89761.5	91591.5	0.0783189	0.0643408	0.0360206	0.0563689	0.278236	0.203574	1
PM09	E01	1% Sodium Formate	osmotic sensitivity, sodium formate	86361	100396	98064	94524	93725.5	96250	98953	0.342954	0.438078	0.645135	0.104515	0.205701	0.232746	1
PM09	E02	2% Sodium Formate	osmotic sensitivity, sodium formate	73442	92118.5	91284.5	81626	88005	89789.5	90464	0.00171623	0.502786	0.810878	0.146225	0.152474	0.542944	1
PM09	E03	3% Sodium Formate	osmotic sensitivity, sodium formate	73075	90168.5	88481	75309.5	81492.5	92189.5	89126.5	0.0153472	0.715911	0.775857	0.032084	0.190413	0.263327	1
PM09	E04	4% Sodium Formate	osmotic sensitivity, sodium formate	79148.5	85928	87249.5	70925.5	76915	87175.5	87278	0.347138	0.227406	0.989034	0.0104115	9.43887e-05	0.976115	1
PM09	E05	5% Sodium Formate	osmotic sensitivity, sodium formate	79085	85341.5	84447	65147.5	78585	80973.5	84850.5	0.216449	0.589711	0.607257	0.00080086	0.0240102	0.0510941	1
PM09	E06	6% Sodium Formate	osmotic sensitivity, sodium formate	71184	83875.5	82385.5	61829.5	68671	83434	86673	0.212386	0.589545	0.44222	0.0563463	0.0523918	0.533067	1
PM09	E07	2% Urea	osmotic sensitivity, urea	66286.5	95637	96607	82688	93664.5	96697	97049	0.0180488	0.209071	0.679514	0.0134161	0.0194549	0.428229	1
PM09	E08	3% Urea	osmotic sensitivity, urea	74102.5	92104.5	90986	79540.5	88929	93047	94060.5	0.000659734	0.13607	0.0123963	0.00488248	0.0526889	0.65031	1
PM09	E09	4% Urea	osmotic sensitivity, urea	76184.5	91450.5	90519	70986.5	87946	89738	92035	0.0126396	0.795687	0.326017	0.0135722	0.0837435	0.140994	1
PM09	E10	5% Urea	osmotic sensitivity, urea	73967	87633	86265	54081.5	84378	81557.5	90720	0.0140654	0.310904	0.0799318	0.00902862	0.0323925	0.0158845	1
PM09	E11	6% Urea	osmotic sensitivity, urea	64927	85738.5	80841.5	34404	78592	72561.5	83157	0.0360634	0.485971	0.478886	0.00794043	0.223296	0.0559911	1
PM09	E12	7% Urea	osmotic sensitivity, urea	48817	74286.5	70538.5	20724.5	68970.5	60130.5	77024.5	0.0038534	0.012774	0.00280804	0.000233213	0.000317091	0.00840037	1
PM09	F01	1% Sodium Lactate	osmotic sensitivity, sodium lactate	74018.5	98598.5	98815	92800.5	94885.5	95722	98136.5	0.00175547	0.844114	0.693844	0.0543584	0.216563	0.494837	1
PM09	F02	2% Sodium Lactate	osmotic sensitivity, sodium lactate	60811	95333	94241.5	83881	94264	90592.5	92681	0.0248593	0.629792	0.75855	0.135714	0.741061	0.759779	1
PM09	F03	3% Sodium Lactate	osmotic sensitivity, sodium lactate	13516	70270	64930.5	30506.5	47246	44300.5	41187	0.337769	0.324764	0.395129	0.689898	0.80963	0.900898	1
PM09	F04	4% Sodium Lactate	osmotic sensitivity, sodium lactate	35057.5	94199.5	95437	37352.5	69455	63296	56151.5	0.430411	0.00148854	0.00140208	0.084347	0.0305049	0.285802	1
PM09	F05	5% Sodium Lactate	osmotic sensitivity, sodium lactate	14977.5	74348.5	68009	23523	50794.5	39730.5	26312	0.376205	0.0567806	0.0528176	0.827809	0.137494	0.305727	1
PM09	F06	6% Sodium Lactate	osmotic sensitivity, sodium lactate	11654.5	69500.5	62972	19088	46081.5	34319.5	14739.5	0.0812775	0.0113848	0.00162368	0.452751	0.00260589	0.0018774	1
PM09	F07	7% Sodium Lactate	osmotic sensitivity, sodium lactate	12489	44277	55668.5	13417.5	24377	26032	15410	0.235992	0.0385943	0.000924978	0.618934	0.288758	0.0501464	1
PM09	F08	8% Sodium Lactate	osmotic sensitivity, sodium lactate	12453	53951.5	57644.5	16475	43527	39784.5	14689.5	0.338221	0.0038801	0.0109172	0.720462	0.00285909	0.0300938	1
PM09	F09	9% Sodium Lactate	osmotic sensitivity, sodium lactate	12595.5	66760.5	61152.5	19251.5	47230	41756.5	14845	0.267895	0.00501988	0.00104622	0.435727	0.00260774	0.011464	1
PM09	F10	10% Sodium Lactate	osmotic sensitivity, sodium lactate	15070	68401.5	63559.5	23464.5	54842.5	47669	39098.5	0.4013	0.343554	0.39456	0.563947	0.569219	0.749918	1
PM09	F11	11% Sodium Lactate	osmotic sensitivity, sodium lactate	15686.5	70278	63680	24563	51047.5	47610	17626	0.0285983	0.020369	0.00985607	0.00143353	0.000437292	0.0127814	1
PM09	F12	12% Sodium Lactate	osmotic sensitivity, sodium lactate	18937.5	64096.5	60018.5	22735	31018	45180.5	30593.5	0.288325	0.0553797	0.0696121	0.433796	0.975192	0.211516	1
PM09	G01	20mM Sodium Phosphate pH 7	toxicity, phosphate	78596	97817	96705.5	94323.5	96617.5	97794	95371	0.0120277	0.506499	0.700946	0.672561	0.735788	0.344153	1
PM09	G02	50mM Sodium Phosphate pH 7	toxicity, phosphate	73475.5	98858.5	98658	94635.5	96778	94961	98750.5	0.0221874	0.959314	0.972754	0.14912	0.339658	0.158236	1
PM09	G03	100mM Sodium Phosphate pH 7	toxicity, phosphate	71472	100267	99064	95887	98719	99397	98244.5	0.0139963	0.535898	0.790504	0.487926	0.899103	0.724794	1
PM09	G04	200mM Sodium Phosphate pH 7	toxicity, phosphate	79852	101778	100538	92695.5	99090.5	95621	100654	0.131147	0.801501	0.979378	0.199993	0.732404	0.349832	1
PM09	G05	20mM Sodium Benzoate pH 5.2	toxicity, benzoate	76086.5	89719	93002.5	77753.5	84379.5	86075.5	86449.5	0.0251772	0.191702	0.118379	0.193664	0.553028	0.90016	1
PM09	G06	50mM Sodium Benzoate pH 5.2	toxicity, benzoate	52982	76066	77796.5	47528.5	70567	60655.5	60214	0.232316	0.00725469	0.0156379	0.148717	0.027443	0.874684	1
PM09	G07	100mM Sodium Benzoate pH 5.2	toxicity, benzoate	23798	56639	58775.5	19503	48629	31051	17419.5	0.452568	0.00054239	0.000487964	0.346812	0.000949631	0.00656833	1
PM09	G08	200mM Sodium Benzoate pH 5.2	toxicity, benzoate	23568	55172	55643	18784	49081.5	21053	20488	0.634714	0.00954941	0.00506435	0.61352	0.00606815	0.873181	1
PM09	G09	10mM Ammonium Sulfate pH 8	toxicity, ammonia	64278.5	95159.5	97242	89205.5	94382.5	93767.5	95289.5	0.0196162	0.930523	0.282327	0.00399085	0.195962	0.631989	1
PM09	G10	20mM Ammonium Sulfate pH 8	toxicity, ammonia	70230.5	93699	97048	87257	93659.5	93297	92720.5	0.0342478	0.733946	0.242224	0.126649	0.705747	0.853163	1
PM09	G11	50mM Ammonium Sulfate pH 8	toxicity, ammonia	75692	92431	94920	87429	92905.5	92278.5	93274.5	0.0629751	0.877791	0.752233	0.30416	0.937315	0.840159	1
PM09	G12	100mM Ammonium Sulfate pH 8	toxicity, ammonia	82115.5	94338	95745	86825.5	92727	94843.5	96557.5	0.053471	0.620355	0.84831	0.128408	0.353584	0.67384	1
PM09	H01	10mM Sodium Nitrate	toxicity, nitrate	90376	91893.5	83189.5	88775.5	92046.5	98933.5	93748.5	0.162591	0.530648	0.326436	0.116892	0.380576	0.28943	1
PM09	H02	20mM Sodium Nitrate	toxicity, nitrate	90816	93229.5	89824.5	86281.5	88407.5	94913.5	95871	0.236254	0.38129	0.219443	0.0520311	0.102644	0.86913	1
PM09	H03	40mM Sodium Nitrate	toxicity, nitrate	91605.5	93872	88527.5	81985.5	87852.5	96824.5	96165	0.161663	0.220862	0.0373662	0.0135756	0.157392	0.734458	1
PM09	H04	60mM Sodium Nitrate	toxicity, nitrate	91503	94368	92349	86507	89434	97509.5	95302.5	0.323818	0.413791	0.0831641	0.0353062	0.205055	0.243766	1
PM09	H05	80mM Sodium Nitrate	toxicity, nitrate	88932	93621	90843.5	81610	89744.5	95793.5	94283.5	0.20583	0.73759	0.186539	0.0938835	0.350338	0.456728	1
PM09	H06	100mM Sodium Nitrate	toxicity, nitrate	87581	93545.5	91516.5	83750	90141.5	92012	91554.5	0.565838	0.303273	0.983932	0.0991598	0.735908	0.737715	1
PM09	H07	10mM Sodium Nitrite	toxicity, nitrite	76609	95962	94081	89012	93330	96500	95877.5	0.127352	0.912024	0.182195	0.00828942	0.230375	0.352828	1
PM09	H08	20mM Sodium Nitrite	toxicity, nitrite	82473	94541	93271.5	88227.5	91180.5	95314.5	93288	0.205568	0.369005	0.989375	0.086298	0.353328	0.27238	1
PM09	H09	40mM Sodium Nitrite	toxicity, nitrite	70260	86288.5	88771	76614.5	84316	87957.5	87791.5	0.01333	0.516762	0.599493	0.0566393	0.144656	0.948166	1
PM09	H10	60mM Sodium Nitrite	toxicity, nitrite	63646.5	80940.5	82115	61161.5	74205	81861	82673.5	0.0276001	0.634	0.790549	0.041709	0.0190202	0.79334	1
PM09	H11	80mM Sodium Nitrite	toxicity, nitrite	63979.5	82696.5	80762.5	64083.5	72756.5	81588	80842	0.0896264	0.536346	0.978137	0.0224367	0.113597	0.881735	1
PM09	H12	100mM Sodium Nitrite	toxicity, nitrite	60428.5	84211	80606	61892	61064.5	78091.5	80593	0.0233854	0.0877961	0.99259	0.00448505	0.0111802	0.644376	1
PM10	A01	pH 3.5	pH, growth at 3.5	18412	19361	20125	19003	21167.5	19800.5	18821	0.914062	0.863376	0.729252	0.951978	0.590728	0.786121	1
PM10	A02	pH 4	pH, growth at 4	14282.5	15485	16548	14272	15812.5	17008	15219.5	0.795604	0.942556	0.76067	0.819321	0.882318	0.636553	1
PM10	A03	pH 4.5	pH, growth at 4.5	14299.5	65822.5	60234.5	16154.5	17289.5	56034	48554.5	0.134595	0.345921	0.495665	0.147213	0.156674	0.761451	1
PM10	A04	pH 5	pH, growth at 5	83011	98439	102159	91077	98841	100154	98853.5	0.0165316	0.850466	0.135549	0.042851	0.996752	0.612032	1
PM10	A05	pH 5.5	pH, growth at 5.5	72695.5	99305.5	103148	93926.5	100193	101064	98661	0.0148602	0.875032	0.294734	0.311969	0.764283	0.550281	1
PM10	A06	pH 6	pH, growth at 6	69881.5	100710	103742	94628	101518	101168	101779	0.00438663	0.326285	0.0565375	0.00917819	0.911396	0.791392	1
PM10	A07	pH 7	pH, growth at 7	68242.5	101832	104350	98036.5	101554	102352	101430	0.00241453	0.914615	0.329888	0.33497	0.97603	0.792243	1
PM10	A08	pH 8	pH, growth at 8	75196.5	97988	103071	94688.5	100899	99354.5	98668.5	0.018277	0.755306	0.00297957	0.00998312	0.435027	0.642224	1
PM10	A09	pH 8.5	pH, growth at 8.5	76814.5	94613	99357.5	90562	95261	95731	95723.5	0.0035216	0.396216	0.150687	0.044439	0.81863	0.995818	1
PM10	A10	pH 9	pH, growth at 9	86535.5	97061.5	100236	91693.5	95502.5	96988	97745	0.120319	0.777268	0.473624	0.0793795	0.37076	0.733469	1
PM10	A11	pH 9.5	pH, growth at 9.5	91767.5	97427.5	100289	93039.5	96569	96580.5	99044.5	0.179775	0.625011	0.509158	0.101464	0.621252	0.497036	1
PM10	A12	pH 10	pH, growth at 10	90639.5	98851.5	98097.5	94483.5	95883.5	97280	98701.5	0.0430124	0.959385	0.799412	0.11124	0.476566	0.726567	1
PM10	B01	pH 4.5	pH, decarboxylase control	16714	27808.5	25703	17534.5	18979	18434	17607	0.613368	0.430244	0.0589798	0.975315	0.481755	0.708383	1
PM10	B02	pH 4.5 + L-Alanine	pH, decarboxylase	35481	54909	77472.5	12079	30972.5	30440.5	26154	0.7343	0.303186	0.0027041	0.0386973	0.36156	0.724766	1
PM10	B03	pH 4.5 + L-Arginine	pH, decarboxylase	21166.5	64901	86981	10302.5	58420.5	62166.5	52903.5	0.00811833	0.00176463	0.00102265	0.000713408	0.073545	0.0161054	1
PM10	B04	pH 4.5 + L-Asparagine	pH, decarboxylase	32869	74731.5	84065.5	27485	66594	73021	73857	0.126786	0.850382	0.0258157	0.00497564	0.054781	0.669558	1
PM10	B05	pH 4.5 + L-Aspartic Acid	pH, decarboxylase	10556	13481	92676.5	12894.5	92083	53381	35387.5	0.35608	0.403448	0.11025	0.393167	0.112606	0.563308	1
PM10	B06	pH 4.5 + L-Glutamic Acid	pH, decarboxylase	11898	60176	94462.5	14577	81418.5	62588	50166	0.00285718	0.0388391	0.000657902	0.00384628	0.00396004	0.171817	1
PM10	B07	pH 4.5 + L-Glutamine	pH, decarboxylase	36482.5	62730	60551.5	34662	16574.5	66344.5	62970	0.0694567	0.945789	0.749838	0.0863862	0.00341335	0.698151	1
PM10	B08	pH 4.5 + Glycine	pH, decarboxylase	13875.5	39006.5	88222.5	25622.5	80285	59680	59259	0.000888724	0.469292	0.00207961	0.00155593	0.00426919	0.967498	1
PM10	B09	pH 4.5 + L-Histidine	pH, decarboxylase	15323.5	35478	65001	17454	35783.5	46754.5	33225	0.374072	0.934406	0.181392	0.423575	0.926542	0.588426	1
PM10	B10	pH 4.5 + L-Isoleucine	pH, decarboxylase	19023.5	21726.5	18095	16210.5	19534	18348.5	21519.5	0.563999	0.963333	0.446745	0.324389	0.638491	0.51936	1
PM10	B11	pH 4.5 + L-Leucine	pH, decarboxylase	16660.5	18590.5	18978	18504	19899	18501	19413	0.199326	0.81226	0.741365	0.241427	0.889659	0.683099	1
PM10	B12	pH 4.5 + L-Lysine	pH, decarboxylase	19351.5	39739	49731.5	21164.5	21305	46325	20977	0.261889	0.407902	0.000300457	0.948646	0.812845	0.031449	1
PM10	C01	pH 4.5 + L-Methionine	pH, decarboxylase	21102.5	30903	42234.5	16337	21386.5	25193.5	17509	0.017963	0.468872	0.309498	0.460305	0.185643	0.259869	1
PM10	C02	pH 4.5 + L-Phenylalanine	pH, decarboxylase	38994.5	64031.5	70510	14670.5	45603	62494.5	46804	0.772274	0.413743	0.014542	0.0031932	0.907338	0.0203152	1
PM10	C03	pH 4.5 + L-Proline	pH, decarboxylase	28327.5	76857	86375.5	28042.5	55296	74323	31681.5	0.892636	0.130119	0.084206	0.881969	0.307636	0.128834	1
PM10	C04	pH 4.5 + L-Serine	pH, decarboxylase	10951	52695	62656	11488.5	52982.5	46753	14031	0.407623	0.00579625	0.0131587	0.520133	0.0302603	0.0114435	1
PM10	C05	pH 4.5 + L-Threonine	pH, decarboxylase	12696.5	71325.5	73535.5	15403	37466	73951.5	44896	0.147722	0.199324	0.180264	0.169529	0.803885	0.174391	1
PM10	C06	pH 4.5 + L-Tryptophan	pH, decarboxylase	13698.5	23522	29988	14582.5	18102	30755.5	15701	0.0513184	0.367728	0.0578194	0.210653	0.0365405	0.00104125	1
PM10	C07	pH 4.5 + L-Tyrosine	pH, decarboxylase	33280.5	62608.5	76231	18482.5	57427.5	71735.5	58540	0.022171	0.538168	0.0300298	0.00459177	0.894707	0.0354635	1
PM10	C08	pH 4.5 + L-Valine	pH, decarboxylase	47184.5	62406.5	73359.5	32701	59497.5	74141.5	61011	0.175757	0.840493	0.161579	0.09843	0.814911	0.153063	1
PM10	C09	pH 4.5 + Hydroxy-L-Proline	pH, decarboxylase	48537	67293.5	76862	36383.5	57109.5	74799.5	61910	0.0316589	0.0959153	0.015671	0.00451179	0.386525	0.013751	1
PM10	C10	pH 4.5 + L-Ornithine	pH, decarboxylase	22981	64832	62627	22148.5	39153.5	66749.5	55890.5	0.00717221	0.192546	0.136081	0.0188286	0.537916	0.044258	1
PM10	C11	pH 4.5 + L-Homoarginine	pH, decarboxylase	26329	67924	64293.5	15612	32121	68159.5	63890.5	0.0155627	0.43154	0.942032	0.00722702	0.0752749	0.57426	1
PM10	C12	pH 4.5 + L-Homoserine	pH, decarboxylase	21181.5	36365	48918	20078.5	21112.5	39429.5	34803	0.45729	0.942688	0.514148	0.427135	0.455748	0.785053	1
PM10	D01	pH 4.5 + Anthranilic acid	pH, decarboxylase	23584	24106	24951.5	23595	25244	24074	24301	0.59314	0.80557	0.436374	0.344573	0.295523	0.744812	1
PM10	D02	pH 4.5 + L-Norleucine	pH, decarboxylase	11706.5	24475.5	15811	11976	13570	14072.5	22496	0.35341	0.910315	0.546916	0.36441	0.428441	0.448829	1
PM10	D03	pH 4.5 + L-Norvaline	pH, decarboxylase	53044	75503	77755	44937.5	67407.5	70840.5	70789	0.0981981	0.114325	0.0401453	0.00283476	0.13358	0.992661	1
PM10	D04	pH 4.5 + a- Amino-N-butyric acid	pH, decarboxylase	24911	64473	69113.5	27865	64444.5	59568.5	60753.5	0.0877145	0.0201857	0.394347	0.00081823	0.345325	0.648625	1
PM10	D05	pH 4.5 + a-Amino Malonate	pH, decarboxylase	18302	21846.5	43359	19219.5	22093.5	36346.5	20368	0.390355	0.466004	0.0248304	0.709022	0.277385	0.0171381	1
PM10	D06	pH 4.5 + b-Hydroxy Glutamate	pH, decarboxylase	57369	79436.5	94307.5	54166.5	88945	77114	73823.5	0.0340428	0.225053	0.0019935	0.0210072	0.0142824	0.0241108	1
PM10	D07	pH 4.5 + g-Hydroxy Glutamate	pH, decarboxylase	44353	70540.5	77576.5	45301.5	73372.5	72364	67480.5	0.0058772	0.0459554	0.00773913	0.0125899	0.218232	0.0537598	1
PM10	D08	pH 4.5 + 5-HydroxyLysine	pH, decarboxylase	56726	72640	89879	39782	78207.5	79624	71564.5	0.0207842	0.869179	0.00526181	0.00180346	0.0430611	0.0304549	1
PM10	D09	pH 4.5 + 5-HydroxyTryptophan	pH, decarboxylase	34653.5	38597	41410.5	35541	40845.5	39270.5	37414	0.185415	0.755274	0.102054	0.372842	0.204971	0.289287	1
PM10	D10	pH 4.5 + D,L Diamino-Pimelic acid	pH, decarboxylase	29128	67580.5	67470.5	26001	64506	64943.5	17509.5	0.440007	0.00491035	0.00168939	0.296316	0.00268778	0.0280986	1
PM10	D11	pH 4.5 + Trimethylamine-N-oxide	pH, decarboxylase	17816.5	40170.5	53875.5	17400	52839	59678.5	55715.5	0.0050389	0.541263	0.885954	0.00570272	0.501788	0.284842	1
PM10	D12	pH 4.5 + Urea	pH, decarboxylase	69065.5	90989.5	83094	57342.5	68603	86913.5	88722.5	0.0137862	0.368411	0.167007	0.0867006	0.0203478	0.720416	1
PM10	E01	pH 9.5	pH, deaminase control	86911.5	95491	95585	88374	91772	94493.5	95142	0.397452	0.863535	0.857873	0.0576959	0.258396	0.740773	1
PM10	E02	pH 9.5 + L-Alanine	pH, deaminase	58549	92746.5	96120.5	87055	89367	94255	94735	0.0425956	0.555038	0.650286	0.015421	0.0355393	0.682213	1
PM10	E03	pH 9.5 + L-Arginine	pH, deaminase	68683.5	95476	95605	87674.5	91077	94415	93808.5	0.00403754	0.064193	0.110726	0.0129766	0.289457	0.423583	1
PM10	E04	pH 9.5 + L-Asparagine	pH, deaminase	72766.5	96608.5	97559	87867	92503.5	95675	94909	0.00648584	0.0234092	0.0532607	0.013227	0.309733	0.393567	1
PM10	E05	pH 9.5 + L-Aspartic Acid	pH, deaminase	75804.5	96761.5	100119	88271	94627	96784	95585.5	0.0364092	0.281929	0.164969	0.0439026	0.757671	0.231538	1
PM10	E06	pH 9.5 + L-Glutamic Acid	pH, deaminase	71828.5	99565.5	100300	91476.5	95579.5	99474.5	98214	0.0139489	0.0280315	0.126247	0.0166082	0.275885	0.0173584	1
PM10	E07	pH 9.5 + L-Glutamine	pH, deaminase	86498.5	96490	100334	92212.5	95385.5	98044	96919	0.0160544	0.839433	0.0586528	0.124109	0.685703	0.451956	1
PM10	E08	pH 9.5 + Glycine	pH, deaminase	66601	99644	98089	93605	94907	99176.5	98962	0.00170494	0.574506	0.585359	0.0662005	0.316628	0.911807	1
PM10	E09	pH 9.5 + L-Histidine	pH, deaminase	87932.5	98257	98525	89709	92103.5	97075.5	97523.5	0.001994	0.518426	0.448917	0.00525226	0.112779	0.50201	1
PM10	E10	pH 9.5 + L-Isoleucine	pH, deaminase	86362.5	92901	93375	85091	91897.5	92246.5	91253.5	0.0251163	0.393235	0.117205	0.00439877	0.655508	0.450605	1
PM10	E11	pH 9.5 + L-Leucine	pH, deaminase	83377.5	93401	95274.5	83697	89490	93283	91145.5	0.00969461	0.214585	0.151702	0.0595089	0.502306	0.0680235	1
PM10	E12	pH 9.5 + L-Lysine	pH, deaminase	96803.5	99719.5	99921	97720	98666	99172	99628	0.109343	0.950155	0.774458	0.048144	0.299168	0.815373	1
PM10	F01	pH 9.5 + L-Methionine	pH, deaminase	90853	96577.5	97149.5	91084.5	92798.5	97231.5	97382	0.0822628	0.720721	0.919789	0.0859306	0.157304	0.950337	1
PM10	F02	pH 9.5 + L-Phenylalanine	pH, deaminase	90493.5	94024.5	96122.5	88453.5	91936	93063	93000	0.653768	0.86461	0.642488	0.463177	0.844192	0.990691	1
PM10	F03	pH 9.5 + L-Proline	pH, deaminase	83302.5	108189	106608	101802	104062	105929	106934	0.00352481	0.498349	0.880022	0.0716767	0.196218	0.648774	1
PM10	F04	pH 9.5 + L-Serine	pH, deaminase	88771.5	99370	100276	88953.5	95570	97808	97862	0.0151026	0.197024	0.169303	0.00957767	0.319769	0.95133	1
PM10	F05	pH 9.5 + L-Threonine	pH, deaminase	68028.5	96633	97082	90422.5	91264.5	96813.5	96704.5	0.000959718	0.90879	0.568873	0.0191952	0.115662	0.928689	1
PM10	F06	pH 9.5 + L-Tryptophan	pH, deaminase	93402	101682	101783	89979	97862	99870.5	100966	0.0185606	0.543969	0.559563	0.00560434	0.267967	0.392552	1
PM10	F07	pH 9.5 + L-Tyrosine	pH, deaminase	92603	101945	105422	93852.5	98539.5	99707.5	99332	0.0615602	0.35031	0.0679924	0.113434	0.728825	0.852088	1
PM10	F08	pH 9.5 + L-Valine	pH, deaminase	79625	93833.5	98072	90659	95603	94428.5	95037.5	0.201329	0.394232	0.103837	0.0860916	0.746427	0.633504	1
PM10	F09	pH 9.5 + Hydroxy-L-Proline	pH, deaminase	80085.5	94303	96804.5	88009.5	94078	92743.5	91435	0.0577225	0.178825	0.0196071	0.264695	0.312029	0.114442	1
PM10	F10	pH 9.5 + L-Ornithine	pH, deaminase	79648	93760.5	95324.5	87200	91520.5	92076.5	93107	0.0545318	0.872687	0.642081	0.269861	0.662622	0.803924	1
PM10	F11	pH 9.5 + L-Homoarginine	pH, deaminase	71287	93304	92814	86486	90049	91505.5	93037.5	0.0574185	0.97176	0.977797	0.432484	0.662986	0.843551	1
PM10	F12	pH 9.5 + L-Homoserine	pH, deaminase	76107.5	95973.5	98339.5	91964	95195.5	96352.5	96539.5	0.0857468	0.494554	0.388336	0.00485043	0.156737	0.929557	1
PM10	G01	pH 9.5 + Anthranilic acid	pH, deaminase	92503	99583.5	95806.5	90455	95084	97814.5	98490.5	0.241769	0.8235	0.547578	0.163988	0.456343	0.88572	1
PM10	G02	pH 9.5 + L-Norleucine	pH, deaminase	89026	95203	93924.5	83180.5	90512	94635.5	94727	0.0918537	0.865235	0.731097	0.0435494	0.18496	0.965457	1
PM10	G03	pH 9.5 + L-Norvaline	pH, deaminase	83975.5	95966.5	96137	89523	93900.5	95604	93557	0.28526	0.138764	0.0039446	0.0779832	0.874749	0.00389224	1
PM10	G04	pH 9.5 + Agmatine	pH, deaminase	81465.5	98780	92621.5	85611	91613	97511.5	98227.5	0.136187	0.124755	0.0146231	0.0146624	0.0529481	0.0393069	1
PM10	G05	pH 9.5 + Cadaverine	pH, deaminase	63909.5	101732	65212	62719.5	77364.5	67621	64959.5	0.771978	0.000588117	0.610126	0.447024	0.0100833	0.801603	1
PM10	G06	pH 9.5 + Putrescine	pH, deaminase	89693	103894	102591	94259.5	97795	101741	102903	0.0743194	0.592076	0.837139	0.0658877	0.147684	0.747954	1
PM10	G07	pH 9.5 + Histamine	pH, deaminase	90149	90236	90006.5	90039	86474	90118	91001	0.508412	0.674274	0.340064	0.637702	0.249684	0.632756	1
PM10	G08	pH 9.5 + Phenylethylamine	pH, deaminase	49561.5	52526	58431	51932	51118	56929.5	51089	0.65559	0.675524	0.187929	0.800858	0.992701	0.193411	1
PM10	G09	pH 9.5 + Tyramine	pH, deaminase	51206.5	74322	53321.5	47058.5	57901	51622.5	58854	0.523224	0.500186	0.57496	0.288348	0.918957	0.468516	1
PM10	G10	pH 9.5 + Tryptamine	pH, deaminase	85629	93083	94379	86300.5	93035	93287.5	91091	0.121696	0.524198	0.33531	0.104757	0.396878	0.306394	1
PM10	G11	pH 9.5 + Trimethylamine-N-oxide	pH, deaminase	92014.5	94698	94693	86432	91894	93268	94196	0.329998	0.871607	0.868604	0.0526554	0.254197	0.655755	1
PM10	G12	pH 9.5 + Urea	pH, deaminase	83157	97486.5	96980.5	89913	93179	94534.5	96689.5	0.0552509	0.828761	0.948737	0.17552	0.321271	0.580556	1
PM10	H01	X-Caprylate	caprylate esterase	75834.5	98350	98514	96145	92504.5	101038	98701.5	0.0733413	0.781329	0.840152	0.102189	0.164629	0.15161	1
PM10	H02	X-alpha-D-Glucoside	alpha-D-glucosidase	61436	63639.5	69015	71639.5	67373.5	63452	67135	0.166464	0.0939833	0.0487713	0.130026	0.951492	0.0734102	1
PM10	H03	X-beta-D-Glucoside	beta-D-glucosidase	56668.5	64493.5	71934	63470	65906	64314.5	63519.5	0.0772811	0.556619	0.101069	0.982592	0.363994	0.773772	1
PM10	H04	X-alpha-D-Galactoside	alpha-D-galactosidase	93736.5	103343	105754	99323.5	102988	103572	102369	0.105059	0.63553	0.192525	0.367592	0.81531	0.538117	1
PM10	H05	X-beta-D-Galactoside	beta-D-galactosidase	86409	104638	106080	99831	102213	103750	103528	0.0840693	0.624986	0.374399	0.421217	0.752781	0.916396	1
PM10	H06	X-alpha-D-Glucuronide	alpha-D-glucuronidase	87482	104418	105542	100216	102831	104086	102510	0.116792	0.486155	0.275371	0.524724	0.931139	0.455763	1
PM10	H07	X-beta-D-Glucuronide	beta-D-glucuronidase	88850.5	101410	103410	98917.5	100649	100344	100807	0.00664067	0.35671	0.0161216	0.213214	0.929583	0.755888	1
PM10	H08	X-beta-D-Glucosaminide	beta-D-glucosaminidase	93432	102444	103735	98154.5	100775	103099	102034	0.349587	0.747807	0.10014	0.1464	0.512074	0.288863	1
PM10	H09	X-beta-D-Galactosaminide	beta-D-galactosaminidase	86276.5	102270	103796	97715.5	100974	101778	101862	0.00892202	0.658254	0.138719	0.152136	0.641969	0.928082	1
PM10	H10	X-alpha-D-Mannoside	alpha-D-mannosidase	93096.5	100632	102338	97977	99942	100697	100457	0.20251	0.965264	0.602251	0.585546	0.910879	0.947636	1
PM10	H11	X-PO4	aryl phosphatase	63371	88502.5	97834	80874	86801	89558	83057.5	0.0941031	0.550121	0.136667	0.822681	0.608454	0.504698	1
PM10	H12	X-SO4	aryl sulfatase	95495.5	98965.5	100040	96229	98082.5	97183.5	98273	0.246829	0.726289	0.404632	0.455049	0.920728	0.684387	1
PM11	A01	Amikacin	protein synthesis; 30S ribosomal subunit; aminoglycoside	331277	365670	352452	336804	344237	364703	368926	0.0308426	0.500044	0.089864	0.076924	0.0509408	0.41569	1
PM11	A02	Amikacin	protein synthesis; 30S ribosomal subunit; aminoglycoside	331277	365670	352452	336804	344237	364703	368926	0.0308426	0.500044	0.089864	0.076924	0.0509408	0.41569	1
PM11	A03	Amikacin	protein synthesis; 30S ribosomal subunit; aminoglycoside	331277	365670	352452	336804	344237	364703	368926	0.0308426	0.500044	0.089864	0.076924	0.0509408	0.41569	1
PM11	A04	Amikacin	protein synthesis; 30S ribosomal subunit; aminoglycoside	331277	365670	352452	336804	344237	364703	368926	0.0308426	0.500044	0.089864	0.076924	0.0509408	0.41569	1
PM11	A05	Chlortetracycline	protein synthesis; 30S ribosomal subunit; tetracycline	156434	222324	229150	145990	181462	205640	221786	0.0124944	0.984582	0.557617	0.0393935	0.0355864	0.195676	1
PM11	A06	Chlortetracycline	protein synthesis; 30S ribosomal subunit; tetracycline	156434	222324	229150	145990	181462	205640	221786	0.0124944	0.984582	0.557617	0.0393935	0.0355864	0.195676	1
PM11	A07	Chlortetracycline	protein synthesis; 30S ribosomal subunit; tetracycline	156434	222324	229150	145990	181462	205640	221786	0.0124944	0.984582	0.557617	0.0393935	0.0355864	0.195676	1
PM11	A08	Chlortetracycline	protein synthesis; 30S ribosomal subunit; tetracycline	156434	222324	229150	145990	181462	205640	221786	0.0124944	0.984582	0.557617	0.0393935	0.0355864	0.195676	1
PM11	A09	Lincomycin	protein synthesis; lincosamide	180342	155474	142676	134384	139000	151600	150760	0.257337	0.647437	0.615236	0.202773	0.453789	0.94172	1
PM11	A10	Lincomycin	protein synthesis; lincosamide	180342	155474	142676	134384	139000	151600	150760	0.257337	0.647437	0.615236	0.202773	0.453789	0.94172	1
PM11	A11	Lincomycin	protein synthesis; lincosamide	180342	155474	142676	134384	139000	151600	150760	0.257337	0.647437	0.615236	0.202773	0.453789	0.94172	1
PM11	A12	Lincomycin	protein synthesis; lincosamide	180342	155474	142676	134384	139000	151600	150760	0.257337	0.647437	0.615236	0.202773	0.453789	0.94172	1
PM11	B01	Amoxicillin	wall; lactam	252052	317373	327736	216867	313345	308838	341774	0.00116095	0.150777	0.522584	0.0206959	0.186012	0.113679	1
PM11	B02	Amoxicillin	wall; lactam	252052	317373	327736	216867	313345	308838	341774	0.00116095	0.150777	0.522584	0.0206959	0.186012	0.113679	1
PM11	B03	Amoxicillin	wall; lactam	252052	317373	327736	216867	313345	308838	341774	0.00116095	0.150777	0.522584	0.0206959	0.186012	0.113679	1
PM11	B04	Amoxicillin	wall; lactam	252052	317373	327736	216867	313345	308838	341774	0.00116095	0.150777	0.522584	0.0206959	0.186012	0.113679	1
PM11	B05	Cloxacillin	wall; lactam	55175	66981	64486	49088	61236.5	63077	61973	0.387621	0.513919	0.754928	0.114464	0.919965	0.834598	1
PM11	B06	Cloxacillin	wall; lactam	55175	66981	64486	49088	61236.5	63077	61973	0.387621	0.513919	0.754928	0.114464	0.919965	0.834598	1
PM11	B07	Cloxacillin	wall; lactam	55175	66981	64486	49088	61236.5	63077	61973	0.387621	0.513919	0.754928	0.114464	0.919965	0.834598	1
PM11	B08	Cloxacillin	wall; lactam	55175	66981	64486	49088	61236.5	63077	61973	0.387621	0.513919	0.754928	0.114464	0.919965	0.834598	1
PM11	B09	Lomefloxacin	DNA unwinding; gyrase (GN); topoisomerase (GP); fluoroquinolone	307014	359038	350187	316208	343842	352830	359306	0.0674583	0.98844	0.582389	0.131719	0.4421	0.750848	1
PM11	B10	Lomefloxacin	DNA unwinding; gyrase (GN); topoisomerase (GP); fluoroquinolone	307014	359038	350187	316208	343842	352830	359306	0.0674583	0.98844	0.582389	0.131719	0.4421	0.750848	1
PM11	B11	Lomefloxacin	DNA unwinding; gyrase (GN); topoisomerase (GP); fluoroquinolone	307014	359038	350187	316208	343842	352830	359306	0.0674583	0.98844	0.582389	0.131719	0.4421	0.750848	1
PM11	B12	Lomefloxacin	DNA unwinding; gyrase (GN); topoisomerase (GP); fluoroquinolone	307014	359038	350187	316208	343842	352830	359306	0.0674583	0.98844	0.582389	0.131719	0.4421	0.750848	1
PM11	C01	Bleomycin	DNA synthesis; polymerase inhibitor	306082	360754	354366	321292	340886	358028	367018	0.018081	0.654764	0.340875	0.0572285	0.161631	0.464401	1
PM11	C02	Bleomycin	DNA synthesis; polymerase inhibitor	306082	360754	354366	321292	340886	358028	367018	0.018081	0.654764	0.340875	0.0572285	0.161631	0.464401	1
PM11	C03	Bleomycin	DNA synthesis; polymerase inhibitor	306082	360754	354366	321292	340886	358028	367018	0.018081	0.654764	0.340875	0.0572285	0.161631	0.464401	1
PM11	C04	Bleomycin	DNA synthesis; polymerase inhibitor	306082	360754	354366	321292	340886	358028	367018	0.018081	0.654764	0.340875	0.0572285	0.161631	0.464401	1
PM11	C05	Colistin	membrane; transport	313938	373498	370032	330190	354392	369488	375038	0.0154523	0.869942	0.585555	0.0363685	0.19551	0.598559	1
PM11	C06	Colistin	membrane; transport	313938	373498	370032	330190	354392	369488	375038	0.0154523	0.869942	0.585555	0.0363685	0.19551	0.598559	1
PM11	C07	Colistin	membrane; transport	313938	373498	370032	330190	354392	369488	375038	0.0154523	0.869942	0.585555	0.0363685	0.19551	0.598559	1
PM11	C08	Colistin	membrane; transport	313938	373498	370032	330190	354392	369488	375038	0.0154523	0.869942	0.585555	0.0363685	0.19551	0.598559	1
PM11	C09	Minocycline	protein synthesis; 30S ribosomal subunit; tetracycline	136130	157054	185688	121150	131100	161373	167883	0.0251722	0.620125	0.682915	0.0192441	0.14707	0.568484	1
PM11	C10	Minocycline	protein synthesis; 30S ribosomal subunit; tetracycline	136130	157054	185688	121150	131100	161373	167883	0.0251722	0.620125	0.682915	0.0192441	0.14707	0.568484	1
PM11	C11	Minocycline	protein synthesis; 30S ribosomal subunit; tetracycline	136130	157054	185688	121150	131100	161373	167883	0.0251722	0.620125	0.682915	0.0192441	0.14707	0.568484	1
PM11	C12	Minocycline	protein synthesis; 30S ribosomal subunit; tetracycline	136130	157054	185688	121150	131100	161373	167883	0.0251722	0.620125	0.682915	0.0192441	0.14707	0.568484	1
PM11	D01	Capreomycin	protein synthesis	319101	359693	352600	318392	342898	356052	364237	0.0508366	0.661903	0.17554	0.0451064	0.124374	0.417984	1
PM11	D02	Capreomycin	protein synthesis	319101	359693	352600	318392	342898	356052	364237	0.0508366	0.661903	0.17554	0.0451064	0.124374	0.417984	1
PM11	D03	Capreomycin	protein synthesis	319101	359693	352600	318392	342898	356052	364237	0.0508366	0.661903	0.17554	0.0451064	0.124374	0.417984	1
PM11	D04	Capreomycin	protein synthesis	319101	359693	352600	318392	342898	356052	364237	0.0508366	0.661903	0.17554	0.0451064	0.124374	0.417984	1
PM11	D05	Demeclocyline	protein synthesis; 30S ribosomal subunit; tetracycline	160902	210652	217516	135794	177102	199458	215449	0.000525022	0.70011	0.90816	0.0113584	0.0255265	0.245355	1
PM11	D06	Demeclocyline	protein synthesis; 30S ribosomal subunit; tetracycline	160902	210652	217516	135794	177102	199458	215449	0.000525022	0.70011	0.90816	0.0113584	0.0255265	0.245355	1
PM11	D07	Demeclocyline	protein synthesis; 30S ribosomal subunit; tetracycline	160902	210652	217516	135794	177102	199458	215449	0.000525022	0.70011	0.90816	0.0113584	0.0255265	0.245355	1
PM11	D08	Demeclocyline	protein synthesis; 30S ribosomal subunit; tetracycline	160902	210652	217516	135794	177102	199458	215449	0.000525022	0.70011	0.90816	0.0113584	0.0255265	0.245355	1
PM11	D09	Nafcillin	wall; lactam	68336	77130.5	73886.5	60096.5	70885	71554	73432.5	0.57092	0.692971	0.953799	0.297021	0.762639	0.872684	1
PM11	D10	Nafcillin	wall; lactam	68336	77130.5	73886.5	60096.5	70885	71554	73432.5	0.57092	0.692971	0.953799	0.297021	0.762639	0.872684	1
PM11	D11	Nafcillin	wall; lactam	68336	77130.5	73886.5	60096.5	70885	71554	73432.5	0.57092	0.692971	0.953799	0.297021	0.762639	0.872684	1
PM11	D12	Nafcillin	wall; lactam	68336	77130.5	73886.5	60096.5	70885	71554	73432.5	0.57092	0.692971	0.953799	0.297021	0.762639	0.872684	1
PM11	E01	Cefazolin	wall; cephalosporin first generation	214691	174064	204626	182655	123474	266835	208675	0.878434	0.480855	0.960464	0.0288872	0.00431799	0.00711186	1
PM11	E02	Cefazolin	wall; cephalosporin first generation	214691	174064	204626	182655	123474	266835	208675	0.878434	0.480855	0.960464	0.0288872	0.00431799	0.00711186	1
PM11	E03	Cefazolin	wall; cephalosporin first generation	214691	174064	204626	182655	123474	266835	208675	0.878434	0.480855	0.960464	0.0288872	0.00431799	0.00711186	1
PM11	E04	Cefazolin	wall; cephalosporin first generation	214691	174064	204626	182655	123474	266835	208675	0.878434	0.480855	0.960464	0.0288872	0.00431799	0.00711186	1
PM11	E05	Enoxacin	DNA unwinding; gyrase (GN); topoisomerase (GP); fluoroquinolone	301316	359737	348147	289327	340714	350216	356968	0.00630114	0.438754	0.179536	0.00247453	0.201372	0.14763	1
PM11	E06	Enoxacin	DNA unwinding; gyrase (GN); topoisomerase (GP); fluoroquinolone	301316	359737	348147	289327	340714	350216	356968	0.00630114	0.438754	0.179536	0.00247453	0.201372	0.14763	1
PM11	E07	Enoxacin	DNA unwinding; gyrase (GN); topoisomerase (GP); fluoroquinolone	301316	359737	348147	289327	340714	350216	356968	0.00630114	0.438754	0.179536	0.00247453	0.201372	0.14763	1
PM11	E08	Enoxacin	DNA unwinding; gyrase (GN); topoisomerase (GP); fluoroquinolone	301316	359737	348147	289327	340714	350216	356968	0.00630114	0.438754	0.179536	0.00247453	0.201372	0.14763	1
PM11	E09	Nalidixic acid	DNA unwinding; gyrase (GN); topoisomerase (GP); quinolone	273160	347302	331192	248459	328278	334996	341294	0.0241471	0.423862	0.0920168	0.0186519	0.219444	0.3653	1
PM11	E10	Nalidixic acid	DNA unwinding; gyrase (GN); topoisomerase (GP); quinolone	273160	347302	331192	248459	328278	334996	341294	0.0241471	0.423862	0.0920168	0.0186519	0.219444	0.3653	1
PM11	E11	Nalidixic acid	DNA unwinding; gyrase (GN); topoisomerase (GP); quinolone	273160	347302	331192	248459	328278	334996	341294	0.0241471	0.423862	0.0920168	0.0186519	0.219444	0.3653	1
PM11	E12	Nalidixic acid	DNA unwinding; gyrase (GN); topoisomerase (GP); quinolone	273160	347302	331192	248459	328278	334996	341294	0.0241471	0.423862	0.0920168	0.0186519	0.219444	0.3653	1
PM11	F01	Chloramphenicol	protein synthesis	233875	280900	277276	243120	266586	278065	278893	0.0282465	0.822394	0.86114	0.0540965	0.274715	0.928955	1
PM11	F02	Chloramphenicol	protein synthesis	233875	280900	277276	243120	266586	278065	278893	0.0282465	0.822394	0.86114	0.0540965	0.274715	0.928955	1
PM11	F03	Chloramphenicol	protein synthesis	233875	280900	277276	243120	266586	278065	278893	0.0282465	0.822394	0.86114	0.0540965	0.274715	0.928955	1
PM11	F04	Chloramphenicol	protein synthesis	233875	280900	277276	243120	266586	278065	278893	0.0282465	0.822394	0.86114	0.0540965	0.274715	0.928955	1
PM11	F05	Erythromycin	protein synthesis; 50S ribosomal subunit; macrolide	56825	71208	64228	54328	61315.5	68338	65501	0.498272	0.693376	0.889339	0.412054	0.679499	0.792056	1
PM11	F06	Erythromycin	protein synthesis; 50S ribosomal subunit; macrolide	56825	71208	64228	54328	61315.5	68338	65501	0.498272	0.693376	0.889339	0.412054	0.679499	0.792056	1
PM11	F07	Erythromycin	protein synthesis; 50S ribosomal subunit; macrolide	56825	71208	64228	54328	61315.5	68338	65501	0.498272	0.693376	0.889339	0.412054	0.679499	0.792056	1
PM11	F08	Erythromycin	protein synthesis; 50S ribosomal subunit; macrolide	56825	71208	64228	54328	61315.5	68338	65501	0.498272	0.693376	0.889339	0.412054	0.679499	0.792056	1
PM11	F09	Neomycin	protein synthesis; 30S ribosomal subunit; aminoglycoside	291606	349812	329864	238925	329431	342988	343193	0.000310474	0.146284	0.37122	0.0200119	0.0137633	0.984352	1
PM11	F10	Neomycin	protein synthesis; 30S ribosomal subunit; aminoglycoside	291606	349812	329864	238925	329431	342988	343193	0.000310474	0.146284	0.37122	0.0200119	0.0137633	0.984352	1
PM11	F11	Neomycin	protein synthesis; 30S ribosomal subunit; aminoglycoside	291606	349812	329864	238925	329431	342988	343193	0.000310474	0.146284	0.37122	0.0200119	0.0137633	0.984352	1
PM11	F12	Neomycin	protein synthesis; 30S ribosomal subunit; aminoglycoside	291606	349812	329864	238925	329431	342988	343193	0.000310474	0.146284	0.37122	0.0200119	0.0137633	0.984352	1
PM11	G01	Ceftriaxone	wall; cephalosporin third generation	310282	363894	352016	310950	292578	364252	369740	0.00331088	0.136361	0.02583	0.050898	0.255292	0.278402	1
PM11	G02	Ceftriaxone	wall; cephalosporin third generation	310282	363894	352016	310950	292578	364252	369740	0.00331088	0.136361	0.02583	0.050898	0.255292	0.278402	1
PM11	G03	Ceftriaxone	wall; cephalosporin third generation	310282	363894	352016	310950	292578	364252	369740	0.00331088	0.136361	0.02583	0.050898	0.255292	0.278402	1
PM11	G04	Ceftriaxone	wall; cephalosporin third generation	310282	363894	352016	310950	292578	364252	369740	0.00331088	0.136361	0.02583	0.050898	0.255292	0.278402	1
PM11	G05	Gentamicin	protein synthesis; 30S ribosomal subunit; aminoglycoside	320142	374810	366912	330989	356292	372414	377920	0.0106479	0.629477	0.128719	0.0295846	0.168176	0.310965	1
PM11	G06	Gentamicin	protein synthesis; 30S ribosomal subunit; aminoglycoside	320142	374810	366912	330989	356292	372414	377920	0.0106479	0.629477	0.128719	0.0295846	0.168176	0.310965	1
PM11	G07	Gentamicin	protein synthesis; 30S ribosomal subunit; aminoglycoside	320142	374810	366912	330989	356292	372414	377920	0.0106479	0.629477	0.128719	0.0295846	0.168176	0.310965	1
PM11	G08	Gentamicin	protein synthesis; 30S ribosomal subunit; aminoglycoside	320142	374810	366912	330989	356292	372414	377920	0.0106479	0.629477	0.128719	0.0295846	0.168176	0.310965	1
PM11	G09	Potassium tellurite	toxic anion	320400	365490	351854	328429	340422	360210	364824	0.0254818	0.616228	0.0338354	0.0315365	0.0276634	0.0617345	1
PM11	G10	Potassium tellurite	toxic anion	320400	365490	351854	328429	340422	360210	364824	0.0254818	0.616228	0.0338354	0.0315365	0.0276634	0.0617345	1
PM11	G11	Potassium tellurite	toxic anion	320400	365490	351854	328429	340422	360210	364824	0.0254818	0.616228	0.0338354	0.0315365	0.0276634	0.0617345	1
PM11	G12	Potassium tellurite	toxic anion	320400	365490	351854	328429	340422	360210	364824	0.0254818	0.616228	0.0338354	0.0315365	0.0276634	0.0617345	1
PM11	H01	Cephalothin	wall; cephalosporin first generation	126141	99278.5	130173	81558	66709.5	136662	106541	0.548481	0.897182	0.692091	0.372624	0.269768	0.328736	1
PM11	H02	Cephalothin	wall; cephalosporin first generation	126141	99278.5	130173	81558	66709.5	136662	106541	0.548481	0.897182	0.692091	0.372624	0.269768	0.328736	1
PM11	H03	Cephalothin	wall; cephalosporin first generation	126141	99278.5	130173	81558	66709.5	136662	106541	0.548481	0.897182	0.692091	0.372624	0.269768	0.328736	1
PM11	H04	Cephalothin	wall; cephalosporin first generation	126141	99278.5	130173	81558	66709.5	136662	106541	0.548481	0.897182	0.692091	0.372624	0.269768	0.328736	1
PM11	H05	Kanamycin	protein synthesis; 30S ribosomal subunit; aminoglycoside	333389	368181	361901	328470	341070	365379	361042	0.228403	0.565869	0.951876	0.406559	0.436724	0.783727	1
PM11	H06	Kanamycin	protein synthesis; 30S ribosomal subunit; aminoglycoside	333389	368181	361901	328470	341070	365379	361042	0.228403	0.565869	0.951876	0.406559	0.436724	0.783727	1
PM11	H07	Kanamycin	protein synthesis; 30S ribosomal subunit; aminoglycoside	333389	368181	361901	328470	341070	365379	361042	0.228403	0.565869	0.951876	0.406559	0.436724	0.783727	1
PM11	H08	Kanamycin	protein synthesis; 30S ribosomal subunit; aminoglycoside	333389	368181	361901	328470	341070	365379	361042	0.228403	0.565869	0.951876	0.406559	0.436724	0.783727	1
PM11	H09	Ofloxacin	DNA unwinding; gyrase (GN); topoisomerase (GP); fluoroquinolone	333982	360127	354327	338068	339032	363512	361926	0.1448	0.898266	0.615034	0.378427	0.448758	0.881514	1
PM11	H10	Ofloxacin	DNA unwinding; gyrase (GN); topoisomerase (GP); fluoroquinolone	333982	360127	354327	338068	339032	363512	361926	0.1448	0.898266	0.615034	0.378427	0.448758	0.881514	1
PM11	H11	Ofloxacin	DNA unwinding; gyrase (GN); topoisomerase (GP); fluoroquinolone	333982	360127	354327	338068	339032	363512	361926	0.1448	0.898266	0.615034	0.378427	0.448758	0.881514	1
PM11	H12	Ofloxacin	DNA unwinding; gyrase (GN); topoisomerase (GP); fluoroquinolone	333982	360127	354327	338068	339032	363512	361926	0.1448	0.898266	0.615034	0.378427	0.448758	0.881514	1
PM12	A01	Penicillin G	wall, lactam	227481	234691	173694	152346	203655	251230	302792	0.00698977	0.282421	0.0102275	0.00162907	0.0226941	0.0211908	1
PM12	A02	Penicillin G	wall, lactam	227481	234691	173694	152346	203655	251230	302792	0.00698977	0.282421	0.0102275	0.00162907	0.0226941	0.0211908	1
PM12	A03	Penicillin G	wall, lactam	227481	234691	173694	152346	203655	251230	302792	0.00698977	0.282421	0.0102275	0.00162907	0.0226941	0.0211908	1
PM12	A04	Penicillin G	wall, lactam	227481	234691	173694	152346	203655	251230	302792	0.00698977	0.282421	0.0102275	0.00162907	0.0226941	0.0211908	1
PM12	A05	Tetracycline	protein synthesis, 30S ribosomal subunit, tetracycline	269911	293774	240688	262618	218244	287548	339092	0.0335379	0.165791	0.0600338	0.0276271	0.0131439	0.0755089	1
PM12	A06	Tetracycline	protein synthesis, 30S ribosomal subunit, tetracycline	269911	293774	240688	262618	218244	287548	339092	0.0335379	0.165791	0.0600338	0.0276271	0.0131439	0.0755089	1
PM12	A07	Tetracycline	protein synthesis, 30S ribosomal subunit, tetracycline	269911	293774	240688	262618	218244	287548	339092	0.0335379	0.165791	0.0600338	0.0276271	0.0131439	0.0755089	1
PM12	A08	Tetracycline	protein synthesis, 30S ribosomal subunit, tetracycline	269911	293774	240688	262618	218244	287548	339092	0.0335379	0.165791	0.0600338	0.0276271	0.0131439	0.0755089	1
PM12	A09	Carbenicillin	wall, lactam	258920	258042	222031	218477	247508	284864	312254	0.030156	0.318965	0.0175919	0.00869036	0.0177591	0.0976441	1
PM12	A10	Carbenicillin	wall, lactam	258920	258042	222031	218477	247508	284864	312254	0.030156	0.318965	0.0175919	0.00869036	0.0177591	0.0976441	1
PM12	A11	Carbenicillin	wall, lactam	258920	258042	222031	218477	247508	284864	312254	0.030156	0.318965	0.0175919	0.00869036	0.0177591	0.0976441	1
PM12	A12	Carbenicillin	wall, lactam	258920	258042	222031	218477	247508	284864	312254	0.030156	0.318965	0.0175919	0.00869036	0.0177591	0.0976441	1
PM12	B01	Oxacillin	wall, lactam	55885.5	63581	61728	52777.5	60012.5	63587	68644	0.0802935	0.331185	0.187059	0.0499924	0.150827	0.375015	1
PM12	B02	Oxacillin	wall, lactam	55885.5	63581	61728	52777.5	60012.5	63587	68644	0.0802935	0.331185	0.187059	0.0499924	0.150827	0.375015	1
PM12	B03	Oxacillin	wall, lactam	55885.5	63581	61728	52777.5	60012.5	63587	68644	0.0802935	0.331185	0.187059	0.0499924	0.150827	0.375015	1
PM12	B04	Oxacillin	wall, lactam	55885.5	63581	61728	52777.5	60012.5	63587	68644	0.0802935	0.331185	0.187059	0.0499924	0.150827	0.375015	1
PM12	B05	Penimepicycline	protein synthesis, 30S ribosomal subunit, tetracycline	184200	206122	163860	136148	138946	179979	224056	0.0225777	0.294046	0.0570829	0.0091479	0.0118241	0.0271818	1
PM12	B06	Penimepicycline	protein synthesis, 30S ribosomal subunit, tetracycline	184200	206122	163860	136148	138946	179979	224056	0.0225777	0.294046	0.0570829	0.0091479	0.0118241	0.0271818	1
PM12	B07	Penimepicycline	protein synthesis, 30S ribosomal subunit, tetracycline	184200	206122	163860	136148	138946	179979	224056	0.0225777	0.294046	0.0570829	0.0091479	0.0118241	0.0271818	1
PM12	B08	Penimepicycline	protein synthesis, 30S ribosomal subunit, tetracycline	184200	206122	163860	136148	138946	179979	224056	0.0225777	0.294046	0.0570829	0.0091479	0.0118241	0.0271818	1
PM12	B09	Polymyxin B	membrane, disorganize structure	316221	367340	358742	328830	345690	358552	372178	0.0255404	0.770707	0.360514	0.0434356	0.152623	0.442511	1
PM12	B10	Polymyxin B	membrane, disorganize structure	316221	367340	358742	328830	345690	358552	372178	0.0255404	0.770707	0.360514	0.0434356	0.152623	0.442511	1
PM12	B11	Polymyxin B	membrane, disorganize structure	316221	367340	358742	328830	345690	358552	372178	0.0255404	0.770707	0.360514	0.0434356	0.152623	0.442511	1
PM12	B12	Polymyxin B	membrane, disorganize structure	316221	367340	358742	328830	345690	358552	372178	0.0255404	0.770707	0.360514	0.0434356	0.152623	0.442511	1
PM12	C01	Paromomycin	protein synthesis, 30S ribosomal subunit, aminoglycoside	299260	351893	339435	268913	337365	343024	331758	0.222501	0.419739	0.713933	0.0798217	0.796504	0.601718	1
PM12	C02	Paromomycin	protein synthesis, 30S ribosomal subunit, aminoglycoside	299260	351893	339435	268913	337365	343024	331758	0.222501	0.419739	0.713933	0.0798217	0.796504	0.601718	1
PM12	C03	Paromomycin	protein synthesis, 30S ribosomal subunit, aminoglycoside	299260	351893	339435	268913	337365	343024	331758	0.222501	0.419739	0.713933	0.0798217	0.796504	0.601718	1
PM12	C04	Paromomycin	protein synthesis, 30S ribosomal subunit, aminoglycoside	299260	351893	339435	268913	337365	343024	331758	0.222501	0.419739	0.713933	0.0798217	0.796504	0.601718	1
PM12	C05	Vancomycin	wall	52314	60634.5	58559.5	49137.5	55402.5	59988.5	69676.5	0.000209196	0.189452	0.000908063	0.00963629	0.000626436	0.0258614	1
PM12	C06	Vancomycin	wall	52314	60634.5	58559.5	49137.5	55402.5	59988.5	69676.5	0.000209196	0.189452	0.000908063	0.00963629	0.000626436	0.0258614	1
PM12	C07	Vancomycin	wall	52314	60634.5	58559.5	49137.5	55402.5	59988.5	69676.5	0.000209196	0.189452	0.000908063	0.00963629	0.000626436	0.0258614	1
PM12	C08	Vancomycin	wall	52314	60634.5	58559.5	49137.5	55402.5	59988.5	69676.5	0.000209196	0.189452	0.000908063	0.00963629	0.000626436	0.0258614	1
PM12	C09	D,L-Serine hydroxamate	tRNA synthetase	302739	355422	351278	319336	341438	351628	359567	0.0439716	0.793103	0.599225	0.0913554	0.364519	0.630601	1
PM12	C10	D,L-Serine hydroxamate	tRNA synthetase	302739	355422	351278	319336	341438	351628	359567	0.0439716	0.793103	0.599225	0.0913554	0.364519	0.630601	1
PM12	C11	D,L-Serine hydroxamate	tRNA synthetase	302739	355422	351278	319336	341438	351628	359567	0.0439716	0.793103	0.599225	0.0913554	0.364519	0.630601	1
PM12	C12	D,L-Serine hydroxamate	tRNA synthetase	302739	355422	351278	319336	341438	351628	359567	0.0439716	0.793103	0.599225	0.0913554	0.364519	0.630601	1
PM12	D01	Sisomicin	protein synthesis, 30S ribosomal subunit, aminoglycoside	297979	331604	299310	263850	321397	337156	349297	0.0017356	0.457101	0.0175234	0.0353755	0.0510529	0.266999	1
PM12	D02	Sisomicin	protein synthesis, 30S ribosomal subunit, aminoglycoside	297979	331604	299310	263850	321397	337156	349297	0.0017356	0.457101	0.0175234	0.0353755	0.0510529	0.266999	1
PM12	D03	Sisomicin	protein synthesis, 30S ribosomal subunit, aminoglycoside	297979	331604	299310	263850	321397	337156	349297	0.0017356	0.457101	0.0175234	0.0353755	0.0510529	0.266999	1
PM12	D04	Sisomicin	protein synthesis, 30S ribosomal subunit, aminoglycoside	297979	331604	299310	263850	321397	337156	349297	0.0017356	0.457101	0.0175234	0.0353755	0.0510529	0.266999	1
PM12	D05	Sulfamethazine	folate synthesis, PABA analog	312269	365963	356302	302093	348734	357028	374850	0.00424231	0.330937	0.0256483	0.045924	0.0703296	0.175667	1
PM12	D06	Sulfamethazine	folate synthesis, PABA analog	312269	365963	356302	302093	348734	357028	374850	0.00424231	0.330937	0.0256483	0.045924	0.0703296	0.175667	1
PM12	D07	Sulfamethazine	folate synthesis, PABA analog	312269	365963	356302	302093	348734	357028	374850	0.00424231	0.330937	0.0256483	0.045924	0.0703296	0.175667	1
PM12	D08	Sulfamethazine	folate synthesis, PABA analog	312269	365963	356302	302093	348734	357028	374850	0.00424231	0.330937	0.0256483	0.045924	0.0703296	0.175667	1
PM12	D09	Novobiocin	DNA unwinding, gyrase (GN), topoisomerase (GP), quinolone	80555	86880.5	84953	77617.5	81603.5	88503	93796	0.183432	0.601939	0.337565	0.151554	0.151894	0.640795	1
PM12	D10	Novobiocin	DNA unwinding, gyrase (GN), topoisomerase (GP), quinolone	80555	86880.5	84953	77617.5	81603.5	88503	93796	0.183432	0.601939	0.337565	0.151554	0.151894	0.640795	1
PM12	D11	Novobiocin	DNA unwinding, gyrase (GN), topoisomerase (GP), quinolone	80555	86880.5	84953	77617.5	81603.5	88503	93796	0.183432	0.601939	0.337565	0.151554	0.151894	0.640795	1
PM12	D12	Novobiocin	DNA unwinding, gyrase (GN), topoisomerase (GP), quinolone	80555	86880.5	84953	77617.5	81603.5	88503	93796	0.183432	0.601939	0.337565	0.151554	0.151894	0.640795	1
PM12	E01	2,4-Diamino-6,7-diisopropylpteridine	dihydrofolate reductase inhibitor	302380	341031	343466	281857	335621	352036	348670	0.0429574	0.605098	0.676184	0.033368	0.289659	0.75095	1
PM12	E02	2,4-Diamino-6,7-diisopropylpteridine	dihydrofolate reductase inhibitor	302380	341031	343466	281857	335621	352036	348670	0.0429574	0.605098	0.676184	0.033368	0.289659	0.75095	1
PM12	E03	2,4-Diamino-6,7-diisopropylpteridine	dihydrofolate reductase inhibitor	302380	341031	343466	281857	335621	352036	348670	0.0429574	0.605098	0.676184	0.033368	0.289659	0.75095	1
PM12	E04	2,4-Diamino-6,7-diisopropylpteridine	dihydrofolate reductase inhibitor	302380	341031	343466	281857	335621	352036	348670	0.0429574	0.605098	0.676184	0.033368	0.289659	0.75095	1
PM12	E05	Sulfadiazine	folate synthesis, PABA analog	305870	360315	348600	272694	343140	351498	370154	0.00222759	0.153528	0.0258546	0.0296766	0.0289327	0.041718	1
PM12	E06	Sulfadiazine	folate synthesis, PABA analog	305870	360315	348600	272694	343140	351498	370154	0.00222759	0.153528	0.0258546	0.0296766	0.0289327	0.041718	1
PM12	E07	Sulfadiazine	folate synthesis, PABA analog	305870	360315	348600	272694	343140	351498	370154	0.00222759	0.153528	0.0258546	0.0296766	0.0289327	0.041718	1
PM12	E08	Sulfadiazine	folate synthesis, PABA analog	305870	360315	348600	272694	343140	351498	370154	0.00222759	0.153528	0.0258546	0.0296766	0.0289327	0.041718	1
PM12	E09	Benzethonium chloride	membrane, detergent, cationic	67192	76107.5	76638.5	66446	73404	74468.5	86437.5	0.0427267	0.290519	0.0904748	0.0637151	0.038613	0.186986	1
PM12	E10	Benzethonium chloride	membrane, detergent, cationic	67192	76107.5	76638.5	66446	73404	74468.5	86437.5	0.0427267	0.290519	0.0904748	0.0637151	0.038613	0.186986	1
PM12	E11	Benzethonium chloride	membrane, detergent, cationic	67192	76107.5	76638.5	66446	73404	74468.5	86437.5	0.0427267	0.290519	0.0904748	0.0637151	0.038613	0.186986	1
PM12	E12	Benzethonium chloride	membrane, detergent, cationic	67192	76107.5	76638.5	66446	73404	74468.5	86437.5	0.0427267	0.290519	0.0904748	0.0637151	0.038613	0.186986	1
PM12	F01	Tobramycin	protein synthesis, 30S ribosomal subunit, aminoglycoside	284984	335690	304786	244249	319518	334224	350464	0.00236622	0.288816	0.0198084	0.002114	0.0186492	0.0802766	1
PM12	F02	Tobramycin	protein synthesis, 30S ribosomal subunit, aminoglycoside	284984	335690	304786	244249	319518	334224	350464	0.00236622	0.288816	0.0198084	0.002114	0.0186492	0.0802766	1
PM12	F03	Tobramycin	protein synthesis, 30S ribosomal subunit, aminoglycoside	284984	335690	304786	244249	319518	334224	350464	0.00236622	0.288816	0.0198084	0.002114	0.0186492	0.0802766	1
PM12	F04	Tobramycin	protein synthesis, 30S ribosomal subunit, aminoglycoside	284984	335690	304786	244249	319518	334224	350464	0.00236622	0.288816	0.0198084	0.002114	0.0186492	0.0802766	1
PM12	F05	Sulfathiazole	folate synthesis, PABA analog	310441	354889	342678	274202	334210	347296	364299	0.0126783	0.376343	0.00761588	0.0766919	0.0423634	0.0788305	1
PM12	F06	Sulfathiazole	folate synthesis, PABA analog	310441	354889	342678	274202	334210	347296	364299	0.0126783	0.376343	0.00761588	0.0766919	0.0423634	0.0788305	1
PM12	F07	Sulfathiazole	folate synthesis, PABA analog	310441	354889	342678	274202	334210	347296	364299	0.0126783	0.376343	0.00761588	0.0766919	0.0423634	0.0788305	1
PM12	F08	Sulfathiazole	folate synthesis, PABA analog	310441	354889	342678	274202	334210	347296	364299	0.0126783	0.376343	0.00761588	0.0766919	0.0423634	0.0788305	1
PM12	F09	5-Fluoroorotic acid	nucleic acid analog, pyrimidine	306649	352526	346906	317506	336742	349891	357644	0.0227661	0.606171	0.379009	0.0422884	0.108548	0.464419	1
PM12	F10	5-Fluoroorotic acid	nucleic acid analog, pyrimidine	306649	352526	346906	317506	336742	349891	357644	0.0227661	0.606171	0.379009	0.0422884	0.108548	0.464419	1
PM12	F11	5-Fluoroorotic acid	nucleic acid analog, pyrimidine	306649	352526	346906	317506	336742	349891	357644	0.0227661	0.606171	0.379009	0.0422884	0.108548	0.464419	1
PM12	F12	5-Fluoroorotic acid	nucleic acid analog, pyrimidine	306649	352526	346906	317506	336742	349891	357644	0.0227661	0.606171	0.379009	0.0422884	0.108548	0.464419	1
PM12	G01	Spectinomycin	protein synthesis, ribosome, aminoglycoside	319232	360828	352944	332452	348762	360570	369993	0.00796415	0.151037	0.075275	0.0142619	0.0346862	0.159532	1
PM12	G02	Spectinomycin	protein synthesis, ribosome, aminoglycoside	319232	360828	352944	332452	348762	360570	369993	0.00796415	0.151037	0.075275	0.0142619	0.0346862	0.159532	1
PM12	G03	Spectinomycin	protein synthesis, ribosome, aminoglycoside	319232	360828	352944	332452	348762	360570	369993	0.00796415	0.151037	0.075275	0.0142619	0.0346862	0.159532	1
PM12	G04	Spectinomycin	protein synthesis, ribosome, aminoglycoside	319232	360828	352944	332452	348762	360570	369993	0.00796415	0.151037	0.075275	0.0142619	0.0346862	0.159532	1
PM12	G05	Sulfamethoxazole	folate synthesis, PABA analog	310165	363163	352094	285160	348696	353247	372000	0.0180543	0.257578	0.0183689	0.0295784	0.103862	0.0464329	1
PM12	G06	Sulfamethoxazole	folate synthesis, PABA analog	310165	363163	352094	285160	348696	353247	372000	0.0180543	0.257578	0.0183689	0.0295784	0.103862	0.0464329	1
PM12	G07	Sulfamethoxazole	folate synthesis, PABA analog	310165	363163	352094	285160	348696	353247	372000	0.0180543	0.257578	0.0183689	0.0295784	0.103862	0.0464329	1
PM12	G08	Sulfamethoxazole	folate synthesis, PABA analog	310165	363163	352094	285160	348696	353247	372000	0.0180543	0.257578	0.0183689	0.0295784	0.103862	0.0464329	1
PM12	G09	L-Aspartic-b-hydroxamate	tRNA synthetase	271254	327178	318918	245636	310200	325985	328976	0.0132534	0.814932	0.313521	0.0630932	0.121505	0.69868	1
PM12	G10	L-Aspartic-b-hydroxamate	tRNA synthetase	271254	327178	318918	245636	310200	325985	328976	0.0132534	0.814932	0.313521	0.0630932	0.121505	0.69868	1
PM12	G11	L-Aspartic-b-hydroxamate	tRNA synthetase	271254	327178	318918	245636	310200	325985	328976	0.0132534	0.814932	0.313521	0.0630932	0.121505	0.69868	1
PM12	G12	L-Aspartic-b-hydroxamate	tRNA synthetase	271254	327178	318918	245636	310200	325985	328976	0.0132534	0.814932	0.313521	0.0630932	0.121505	0.69868	1
PM12	H01	Spiramycin	protein synthesis, 50S ribosomal subunit, macrolide	64050.5	77290	70120	61503.5	74695.5	70876	74889.5	0.613926	0.915023	0.795339	0.548529	0.992071	0.851072	1
PM12	H02	Spiramycin	protein synthesis, 50S ribosomal subunit, macrolide	64050.5	77290	70120	61503.5	74695.5	70876	74889.5	0.613926	0.915023	0.795339	0.548529	0.992071	0.851072	1
PM12	H03	Spiramycin	protein synthesis, 50S ribosomal subunit, macrolide	64050.5	77290	70120	61503.5	74695.5	70876	74889.5	0.613926	0.915023	0.795339	0.548529	0.992071	0.851072	1
PM12	H04	Spiramycin	protein synthesis, 50S ribosomal subunit, macrolide	64050.5	77290	70120	61503.5	74695.5	70876	74889.5	0.613926	0.915023	0.795339	0.548529	0.992071	0.851072	1
PM12	H05	Rifampicin	RNA polymerase	67849.5	116841	75064.5	63798.5	116242	74442.5	114560	0.206909	0.972329	0.238191	0.191022	0.949025	0.271957	1
PM12	H06	Rifampicin	RNA polymerase	67849.5	116841	75064.5	63798.5	116242	74442.5	114560	0.206909	0.972329	0.238191	0.191022	0.949025	0.271957	1
PM12	H07	Rifampicin	RNA polymerase	67849.5	116841	75064.5	63798.5	116242	74442.5	114560	0.206909	0.972329	0.238191	0.191022	0.949025	0.271957	1
PM12	H08	Rifampicin	RNA polymerase	67849.5	116841	75064.5	63798.5	116242	74442.5	114560	0.206909	0.972329	0.238191	0.191022	0.949025	0.271957	1
PM12	H09	Dodecyltrimethyl ammonium bromide	membrane, detergent, cationic	158712	223404	219056	138072	192557	216318	228518	0.0586473	0.776149	0.51986	0.0238816	0.0972	0.46402	1
PM12	H10	Dodecyltrimethyl ammonium bromide	membrane, detergent, cationic	158712	223404	219056	138072	192557	216318	228518	0.0586473	0.776149	0.51986	0.0238816	0.0972	0.46402	1
PM12	H11	Dodecyltrimethyl ammonium bromide	membrane, detergent, cationic	158712	223404	219056	138072	192557	216318	228518	0.0586473	0.776149	0.51986	0.0238816	0.0972	0.46402	1
PM12	H12	Dodecyltrimethyl ammonium bromide	membrane, detergent, cationic	158712	223404	219056	138072	192557	216318	228518	0.0586473	0.776149	0.51986	0.0238816	0.0972	0.46402	1
PM13	A01	Ampicillin	wall, lactam	339530	373328	366092	327323	369024	373468	382476	0.0128511	0.278567	0.0538487	0.0201976	0.229762	0.100545	1
PM13	A02	Ampicillin	wall, lactam	339530	373328	366092	327323	369024	373468	382476	0.0128511	0.278567	0.0538487	0.0201976	0.229762	0.100545	1
PM13	A03	Ampicillin	wall, lactam	339530	373328	366092	327323	369024	373468	382476	0.0128511	0.278567	0.0538487	0.0201976	0.229762	0.100545	1
PM13	A04	Ampicillin	wall, lactam	339530	373328	366092	327323	369024	373468	382476	0.0128511	0.278567	0.0538487	0.0201976	0.229762	0.100545	1
PM13	A05	Dequalinium	ion channal inhibitor, K+ (m)	333552	379336	369241	338698	365665	386248	389334	0.0252452	0.366203	0.00165644	0.00532705	0.12922	0.66697	1
PM13	A06	Dequalinium	ion channal inhibitor, K+ (m)	333552	379336	369241	338698	365665	386248	389334	0.0252452	0.366203	0.00165644	0.00532705	0.12922	0.66697	1
PM13	A07	Dequalinium	ion channal inhibitor, K+ (m)	333552	379336	369241	338698	365665	386248	389334	0.0252452	0.366203	0.00165644	0.00532705	0.12922	0.66697	1
PM13	A08	Dequalinium	ion channal inhibitor, K+ (m)	333552	379336	369241	338698	365665	386248	389334	0.0252452	0.366203	0.00165644	0.00532705	0.12922	0.66697	1
PM13	A09	Nickel chloride	toxic cation	329616	348604	334388	286208	327074	338108	347961	0.0225367	0.840489	0.135163	0.00342232	0.035839	0.0875427	1
PM13	A10	Nickel chloride	toxic cation	329616	348604	334388	286208	327074	338108	347961	0.0225367	0.840489	0.135163	0.00342232	0.035839	0.0875427	1
PM13	A11	Nickel chloride	toxic cation	329616	348604	334388	286208	327074	338108	347961	0.0225367	0.840489	0.135163	0.00342232	0.035839	0.0875427	1
PM13	A12	Nickel chloride	toxic cation	329616	348604	334388	286208	327074	338108	347961	0.0225367	0.840489	0.135163	0.00342232	0.035839	0.0875427	1
PM13	B01	Azlocillin	wall, lactam	300520	324652	342076	251863	347119	346736	358375	0.0228438	0.271584	0.0293031	0.0119667	0.432911	0.238884	1
PM13	B02	Azlocillin	wall, lactam	300520	324652	342076	251863	347119	346736	358375	0.0228438	0.271584	0.0293031	0.0119667	0.432911	0.238884	1
PM13	B03	Azlocillin	wall, lactam	300520	324652	342076	251863	347119	346736	358375	0.0228438	0.271584	0.0293031	0.0119667	0.432911	0.238884	1
PM13	B04	Azlocillin	wall, lactam	300520	324652	342076	251863	347119	346736	358375	0.0228438	0.271584	0.0293031	0.0119667	0.432911	0.238884	1
PM13	B05	2,2`-Dipyridyl	chelator, Fe++	133404	216731	228607	146215	229741	206278	198691	0.0877711	0.59838	0.286723	0.133109	0.272808	0.756067	1
PM13	B06	2,2`-Dipyridyl	chelator, Fe++	133404	216731	228607	146215	229741	206278	198691	0.0877711	0.59838	0.286723	0.133109	0.272808	0.756067	1
PM13	B07	2,2`-Dipyridyl	chelator, Fe++	133404	216731	228607	146215	229741	206278	198691	0.0877711	0.59838	0.286723	0.133109	0.272808	0.756067	1
PM13	B08	2,2`-Dipyridyl	chelator, Fe++	133404	216731	228607	146215	229741	206278	198691	0.0877711	0.59838	0.286723	0.133109	0.272808	0.756067	1
PM13	B09	Oxolinic acid	DNA unwinding, gyrase (GN), topoisomerase (GP), quinolone	251535	339480	331612	272228	332311	332382	358673	0.00556509	0.236683	0.0543383	0.00884241	0.242675	0.162124	1
PM13	B10	Oxolinic acid	DNA unwinding, gyrase (GN), topoisomerase (GP), quinolone	251535	339480	331612	272228	332311	332382	358673	0.00556509	0.236683	0.0543383	0.00884241	0.242675	0.162124	1
PM13	B11	Oxolinic acid	DNA unwinding, gyrase (GN), topoisomerase (GP), quinolone	251535	339480	331612	272228	332311	332382	358673	0.00556509	0.236683	0.0543383	0.00884241	0.242675	0.162124	1
PM13	B12	Oxolinic acid	DNA unwinding, gyrase (GN), topoisomerase (GP), quinolone	251535	339480	331612	272228	332311	332382	358673	0.00556509	0.236683	0.0543383	0.00884241	0.242675	0.162124	1
PM13	C01	6-Mercaptopurine	nucleic acid analog, purine	306908	364266	364119	303450	357644	357940	362108	0.0104668	0.647181	0.662302	0.00796449	0.748729	0.592501	1
PM13	C02	6-Mercaptopurine	nucleic acid analog, purine	306908	364266	364119	303450	357644	357940	362108	0.0104668	0.647181	0.662302	0.00796449	0.748729	0.592501	1
PM13	C03	6-Mercaptopurine	nucleic acid analog, purine	306908	364266	364119	303450	357644	357940	362108	0.0104668	0.647181	0.662302	0.00796449	0.748729	0.592501	1
PM13	C04	6-Mercaptopurine	nucleic acid analog, purine	306908	364266	364119	303450	357644	357940	362108	0.0104668	0.647181	0.662302	0.00796449	0.748729	0.592501	1
PM13	C05	Doxycycline	protein synthesis, tetracycline	125542	192062	160392	91357	139466	172949	200528	0.0257948	0.808692	0.0679925	0.0145077	0.0307357	0.128849	1
PM13	C06	Doxycycline	protein synthesis, tetracycline	125542	192062	160392	91357	139466	172949	200528	0.0257948	0.808692	0.0679925	0.0145077	0.0307357	0.128849	1
PM13	C07	Doxycycline	protein synthesis, tetracycline	125542	192062	160392	91357	139466	172949	200528	0.0257948	0.808692	0.0679925	0.0145077	0.0307357	0.128849	1
PM13	C08	Doxycycline	protein synthesis, tetracycline	125542	192062	160392	91357	139466	172949	200528	0.0257948	0.808692	0.0679925	0.0145077	0.0307357	0.128849	1
PM13	C09	Potassium chromate	toxic anion	200997	265460	259652	200043	215468	254513	271832	0.00863896	0.514956	0.124438	0.00564128	0.0164065	0.0648183	1
PM13	C10	Potassium chromate	toxic anion	200997	265460	259652	200043	215468	254513	271832	0.00863896	0.514956	0.124438	0.00564128	0.0164065	0.0648183	1
PM13	C11	Potassium chromate	toxic anion	200997	265460	259652	200043	215468	254513	271832	0.00863896	0.514956	0.124438	0.00564128	0.0164065	0.0648183	1
PM13	C12	Potassium chromate	toxic anion	200997	265460	259652	200043	215468	254513	271832	0.00863896	0.514956	0.124438	0.00564128	0.0164065	0.0648183	1
PM13	D01	Cefuroxime	wall, cephalosporin second generation	223938	235190	236824	179098	218328	230772	237996	0.361246	0.878876	0.906741	0.00748952	0.024964	0.0566022	1
PM13	D02	Cefuroxime	wall, cephalosporin second generation	223938	235190	236824	179098	218328	230772	237996	0.361246	0.878876	0.906741	0.00748952	0.024964	0.0566022	1
PM13	D03	Cefuroxime	wall, cephalosporin second generation	223938	235190	236824	179098	218328	230772	237996	0.361246	0.878876	0.906741	0.00748952	0.024964	0.0566022	1
PM13	D04	Cefuroxime	wall, cephalosporin second generation	223938	235190	236824	179098	218328	230772	237996	0.361246	0.878876	0.906741	0.00748952	0.024964	0.0566022	1
PM13	D05	5-Fluorouracil	nucleic acid analog, pyrimidine	307206	382091	374852	330423	361748	373484	385088	0.00945859	0.609387	0.0785497	0.00290074	0.130498	0.154912	1
PM13	D06	5-Fluorouracil	nucleic acid analog, pyrimidine	307206	382091	374852	330423	361748	373484	385088	0.00945859	0.609387	0.0785497	0.00290074	0.130498	0.154912	1
PM13	D07	5-Fluorouracil	nucleic acid analog, pyrimidine	307206	382091	374852	330423	361748	373484	385088	0.00945859	0.609387	0.0785497	0.00290074	0.130498	0.154912	1
PM13	D08	5-Fluorouracil	nucleic acid analog, pyrimidine	307206	382091	374852	330423	361748	373484	385088	0.00945859	0.609387	0.0785497	0.00290074	0.130498	0.154912	1
PM13	D09	Rolitetracycline	protein synthesis, 30S ribosomal subunit, tetracycline	198793	242222	231488	199335	216750	232084	248300	0.00416929	0.684232	0.0601357	0.0307376	0.061423	0.112038	1
PM13	D10	Rolitetracycline	protein synthesis, 30S ribosomal subunit, tetracycline	198793	242222	231488	199335	216750	232084	248300	0.00416929	0.684232	0.0601357	0.0307376	0.061423	0.112038	1
PM13	D11	Rolitetracycline	protein synthesis, 30S ribosomal subunit, tetracycline	198793	242222	231488	199335	216750	232084	248300	0.00416929	0.684232	0.0601357	0.0307376	0.061423	0.112038	1
PM13	D12	Rolitetracycline	protein synthesis, 30S ribosomal subunit, tetracycline	198793	242222	231488	199335	216750	232084	248300	0.00416929	0.684232	0.0601357	0.0307376	0.061423	0.112038	1
PM13	E01	Cytosine arabinoside	nucleic acid analog, pyrimidine	314010	368181	361704	328400	353052	364855	366758	0.013554	0.871938	0.576036	0.0394709	0.166689	0.788241	1
PM13	E02	Cytosine arabinoside	nucleic acid analog, pyrimidine	314010	368181	361704	328400	353052	364855	366758	0.013554	0.871938	0.576036	0.0394709	0.166689	0.788241	1
PM13	E03	Cytosine arabinoside	nucleic acid analog, pyrimidine	314010	368181	361704	328400	353052	364855	366758	0.013554	0.871938	0.576036	0.0394709	0.166689	0.788241	1
PM13	E04	Cytosine arabinoside	nucleic acid analog, pyrimidine	314010	368181	361704	328400	353052	364855	366758	0.013554	0.871938	0.576036	0.0394709	0.166689	0.788241	1
PM13	E05	Geneticin (G418)	protein synthesis, aminoglycoside	315762	383108	373318	335060	361216	372332	385057	0.004112	0.589295	0.00911754	0.000654685	0.0467451	0.118464	1
PM13	E06	Geneticin (G418)	protein synthesis, aminoglycoside	315762	383108	373318	335060	361216	372332	385057	0.004112	0.589295	0.00911754	0.000654685	0.0467451	0.118464	1
PM13	E07	Geneticin (G418)	protein synthesis, aminoglycoside	315762	383108	373318	335060	361216	372332	385057	0.004112	0.589295	0.00911754	0.000654685	0.0467451	0.118464	1
PM13	E08	Geneticin (G418)	protein synthesis, aminoglycoside	315762	383108	373318	335060	361216	372332	385057	0.004112	0.589295	0.00911754	0.000654685	0.0467451	0.118464	1
PM13	E09	Ruthenium red	respiration, mitochondrial Ca++ porter	339090	373120	366272	339969	357968	368461	378082	0.0456688	0.634928	0.301849	0.0501921	0.152296	0.377643	1
PM13	E10	Ruthenium red	respiration, mitochondrial Ca++ porter	339090	373120	366272	339969	357968	368461	378082	0.0456688	0.634928	0.301849	0.0501921	0.152296	0.377643	1
PM13	E11	Ruthenium red	respiration, mitochondrial Ca++ porter	339090	373120	366272	339969	357968	368461	378082	0.0456688	0.634928	0.301849	0.0501921	0.152296	0.377643	1
PM13	E12	Ruthenium red	respiration, mitochondrial Ca++ porter	339090	373120	366272	339969	357968	368461	378082	0.0456688	0.634928	0.301849	0.0501921	0.152296	0.377643	1
PM13	F01	Cesium chloride	toxic cation	331039	376602	369644	343794	365346	375758	380320	0.041204	0.755665	0.438826	0.0860666	0.283594	0.72424	1
PM13	F02	Cesium chloride	toxic cation	331039	376602	369644	343794	365346	375758	380320	0.041204	0.755665	0.438826	0.0860666	0.283594	0.72424	1
PM13	F03	Cesium chloride	toxic cation	331039	376602	369644	343794	365346	375758	380320	0.041204	0.755665	0.438826	0.0860666	0.283594	0.72424	1
PM13	F04	Cesium chloride	toxic cation	331039	376602	369644	343794	365346	375758	380320	0.041204	0.755665	0.438826	0.0860666	0.283594	0.72424	1
PM13	F05	Glycine	wall	327416	384306	375930	331185	363294	372478	380868	0.00885567	0.680893	0.126217	0.000522468	0.102708	0.0137641	1
PM13	F06	Glycine	wall	327416	384306	375930	331185	363294	372478	380868	0.00885567	0.680893	0.126217	0.000522468	0.102708	0.0137641	1
PM13	F07	Glycine	wall	327416	384306	375930	331185	363294	372478	380868	0.00885567	0.680893	0.126217	0.000522468	0.102708	0.0137641	1
PM13	F08	Glycine	wall	327416	384306	375930	331185	363294	372478	380868	0.00885567	0.680893	0.126217	0.000522468	0.102708	0.0137641	1
PM13	F09	Thallium (I) acetate	toxic cation	293096	319358	310231	281958	311647	309781	317406	0.0878948	0.87077	0.467527	0.0637839	0.571035	0.503785	1
PM13	F10	Thallium (I) acetate	toxic cation	293096	319358	310231	281958	311647	309781	317406	0.0878948	0.87077	0.467527	0.0637839	0.571035	0.503785	1
PM13	F11	Thallium (I) acetate	toxic cation	293096	319358	310231	281958	311647	309781	317406	0.0878948	0.87077	0.467527	0.0637839	0.571035	0.503785	1
PM13	F12	Thallium (I) acetate	toxic cation	293096	319358	310231	281958	311647	309781	317406	0.0878948	0.87077	0.467527	0.0637839	0.571035	0.503785	1
PM13	G01	Cobalt chloride	toxic cation	249481	293058	293840	242753	285290	301696	290211	0.129665	0.871377	0.765904	0.0673328	0.689117	0.4044	1
PM13	G02	Cobalt chloride	toxic cation	249481	293058	293840	242753	285290	301696	290211	0.129665	0.871377	0.765904	0.0673328	0.689117	0.4044	1
PM13	G03	Cobalt chloride	toxic cation	249481	293058	293840	242753	285290	301696	290211	0.129665	0.871377	0.765904	0.0673328	0.689117	0.4044	1
PM13	G04	Cobalt chloride	toxic cation	249481	293058	293840	242753	285290	301696	290211	0.129665	0.871377	0.765904	0.0673328	0.689117	0.4044	1
PM13	G05	Manganese (II) chloride	toxic cation	289580	372246	344359	306751	352732	344112	363188	0.00980813	0.268423	0.0511345	0.00589127	0.243301	0.0370416	1
PM13	G06	Manganese (II) chloride	toxic cation	289580	372246	344359	306751	352732	344112	363188	0.00980813	0.268423	0.0511345	0.00589127	0.243301	0.0370416	1
PM13	G07	Manganese (II) chloride	toxic cation	289580	372246	344359	306751	352732	344112	363188	0.00980813	0.268423	0.0511345	0.00589127	0.243301	0.0370416	1
PM13	G08	Manganese (II) chloride	toxic cation	289580	372246	344359	306751	352732	344112	363188	0.00980813	0.268423	0.0511345	0.00589127	0.243301	0.0370416	1
PM13	G09	Trifluoperazine	cell cycle modulation, DNA synthesis, Ca(2+)/calmodulin dependent protein phosphorylation and lipid	206388	239244	232726	185206	218879	231483	241984	0.0686958	0.543094	0.0119959	0.000181337	0.00261859	0.0240469	1
PM13	G10	Trifluoperazine	cell cycle modulation, DNA synthesis, Ca(2+)/calmodulin dependent protein phosphorylation and lipid	206388	239244	232726	185206	218879	231483	241984	0.0686958	0.543094	0.0119959	0.000181337	0.00261859	0.0240469	1
PM13	G11	Trifluoperazine	cell cycle modulation, DNA synthesis, Ca(2+)/calmodulin dependent protein phosphorylation and lipid	206388	239244	232726	185206	218879	231483	241984	0.0686958	0.543094	0.0119959	0.000181337	0.00261859	0.0240469	1
PM13	G12	Trifluoperazine	cell cycle modulation, DNA synthesis, Ca(2+)/calmodulin dependent protein phosphorylation and lipid	206388	239244	232726	185206	218879	231483	241984	0.0686958	0.543094	0.0119959	0.000181337	0.00261859	0.0240469	1
PM13	H01	Cupric chloride	toxic cation	233372	267740	246658	215108	239701	257438	271302	0.155778	0.734406	0.0711534	0.0327153	0.0798366	0.404342	1
PM13	H02	Cupric chloride	toxic cation	233372	267740	246658	215108	239701	257438	271302	0.155778	0.734406	0.0711534	0.0327153	0.0798366	0.404342	1
PM13	H03	Cupric chloride	toxic cation	233372	267740	246658	215108	239701	257438	271302	0.155778	0.734406	0.0711534	0.0327153	0.0798366	0.404342	1
PM13	H04	Cupric chloride	toxic cation	233372	267740	246658	215108	239701	257438	271302	0.155778	0.734406	0.0711534	0.0327153	0.0798366	0.404342	1
PM13	H05	Moxalactam	wall, lactam	348462	385250	375332	349173	371358	377440	388242	0.0711658	0.674483	0.110983	0.0478563	0.300348	0.270304	1
PM13	H06	Moxalactam	wall, lactam	348462	385250	375332	349173	371358	377440	388242	0.0711658	0.674483	0.110983	0.0478563	0.300348	0.270304	1
PM13	H07	Moxalactam	wall, lactam	348462	385250	375332	349173	371358	377440	388242	0.0711658	0.674483	0.110983	0.0478563	0.300348	0.270304	1
PM13	H08	Moxalactam	wall, lactam	348462	385250	375332	349173	371358	377440	388242	0.0711658	0.674483	0.110983	0.0478563	0.300348	0.270304	1
PM13	H09	Tylosin	protein synthesis, 50S ribosomal subunit, macrolide	73332.5	85118.5	80659.5	67972	74010	78591	82585.5	0.619592	0.892021	0.904085	0.416441	0.618058	0.800939	1
PM13	H10	Tylosin	protein synthesis, 50S ribosomal subunit, macrolide	73332.5	85118.5	80659.5	67972	74010	78591	82585.5	0.619592	0.892021	0.904085	0.416441	0.618058	0.800939	1
PM13	H11	Tylosin	protein synthesis, 50S ribosomal subunit, macrolide	73332.5	85118.5	80659.5	67972	74010	78591	82585.5	0.619592	0.892021	0.904085	0.416441	0.618058	0.800939	1
PM13	H12	Tylosin	protein synthesis, 50S ribosomal subunit, macrolide	73332.5	85118.5	80659.5	67972	74010	78591	82585.5	0.619592	0.892021	0.904085	0.416441	0.618058	0.800939	1
PM14	A01	Acriflavine	DNA intercalator	155964	175156	172417	128524	167232	168446	178898	0.0754186	0.644358	0.513465	0.038915	0.228215	0.237348	1
PM14	A02	Acriflavine	DNA intercalator	155964	175156	172417	128524	167232	168446	178898	0.0754186	0.644358	0.513465	0.038915	0.228215	0.237348	1
PM14	A03	Acriflavine	DNA intercalator	155964	175156	172417	128524	167232	168446	178898	0.0754186	0.644358	0.513465	0.038915	0.228215	0.237348	1
PM14	A04	Acriflavine	DNA intercalator	155964	175156	172417	128524	167232	168446	178898	0.0754186	0.644358	0.513465	0.038915	0.228215	0.237348	1
PM14	A05	Furaltadone	DNA damage, multiple sites, nitrofuran analog	288308	298393	295452	238361	290946	300690	333188	0.345156	0.307356	0.275636	0.0679175	0.242553	0.33683	1
PM14	A06	Furaltadone	DNA damage, multiple sites, nitrofuran analog	288308	298393	295452	238361	290946	300690	333188	0.345156	0.307356	0.275636	0.0679175	0.242553	0.33683	1
PM14	A07	Furaltadone	DNA damage, multiple sites, nitrofuran analog	288308	298393	295452	238361	290946	300690	333188	0.345156	0.307356	0.275636	0.0679175	0.242553	0.33683	1
PM14	A08	Furaltadone	DNA damage, multiple sites, nitrofuran analog	288308	298393	295452	238361	290946	300690	333188	0.345156	0.307356	0.275636	0.0679175	0.242553	0.33683	1
PM14	A09	Sanguinarine	ATPase, Na+/K+ and Mg++	205764	159448	154841	129912	153096	211430	148146	0.454672	0.206835	0.185815	0.036483	0.439066	0.45237	1
PM14	A10	Sanguinarine	ATPase, Na+/K+ and Mg++	205764	159448	154841	129912	153096	211430	148146	0.454672	0.206835	0.185815	0.036483	0.439066	0.45237	1
PM14	A11	Sanguinarine	ATPase, Na+/K+ and Mg++	205764	159448	154841	129912	153096	211430	148146	0.454672	0.206835	0.185815	0.036483	0.439066	0.45237	1
PM14	A12	Sanguinarine	ATPase, Na+/K+ and Mg++	205764	159448	154841	129912	153096	211430	148146	0.454672	0.206835	0.185815	0.036483	0.439066	0.45237	1
PM14	B01	9-Aminoacridine	DNA intercalator	287004	332615	325734	242348	321360	294690	326180	0.110756	0.398905	0.949292	0.00553143	0.725475	0.47868	1
PM14	B02	9-Aminoacridine	DNA intercalator	287004	332615	325734	242348	321360	294690	326180	0.110756	0.398905	0.949292	0.00553143	0.725475	0.47868	1
PM14	B03	9-Aminoacridine	DNA intercalator	287004	332615	325734	242348	321360	294690	326180	0.110756	0.398905	0.949292	0.00553143	0.725475	0.47868	1
PM14	B04	9-Aminoacridine	DNA intercalator	287004	332615	325734	242348	321360	294690	326180	0.110756	0.398905	0.949292	0.00553143	0.725475	0.47868	1
PM14	B05	Fusaric acid	chelator, Fe, lipophilic, deplete Fe in yeast	212426	298024	292774	201760	266992	281972	293996	0.000500366	0.207269	0.762627	0.00395323	0.0704107	0.260342	1
PM14	B06	Fusaric acid	chelator, Fe, lipophilic, deplete Fe in yeast	212426	298024	292774	201760	266992	281972	293996	0.000500366	0.207269	0.762627	0.00395323	0.0704107	0.260342	1
PM14	B07	Fusaric acid	chelator, Fe, lipophilic, deplete Fe in yeast	212426	298024	292774	201760	266992	281972	293996	0.000500366	0.207269	0.762627	0.00395323	0.0704107	0.260342	1
PM14	B08	Fusaric acid	chelator, Fe, lipophilic, deplete Fe in yeast	212426	298024	292774	201760	266992	281972	293996	0.000500366	0.207269	0.762627	0.00395323	0.0704107	0.260342	1
PM14	B09	Sodium arsenate	toxic anion, PO4 analog	314268	357092	352099	321108	343644	354757	359119	0.0668315	0.872537	0.570077	0.135946	0.427076	0.800955	1
PM14	B10	Sodium arsenate	toxic anion, PO4 analog	314268	357092	352099	321108	343644	354757	359119	0.0668315	0.872537	0.570077	0.135946	0.427076	0.800955	1
PM14	B11	Sodium arsenate	toxic anion, PO4 analog	314268	357092	352099	321108	343644	354757	359119	0.0668315	0.872537	0.570077	0.135946	0.427076	0.800955	1
PM14	B12	Sodium arsenate	toxic anion, PO4 analog	314268	357092	352099	321108	343644	354757	359119	0.0668315	0.872537	0.570077	0.135946	0.427076	0.800955	1
PM14	C01	Boric Acid	toxic anion	244612	276838	270192	233857	271168	269595	272858	0.144191	0.626234	0.733771	0.0362226	0.885979	0.712127	1
PM14	C02	Boric Acid	toxic anion	244612	276838	270192	233857	271168	269595	272858	0.144191	0.626234	0.733771	0.0362226	0.885979	0.712127	1
PM14	C03	Boric Acid	toxic anion	244612	276838	270192	233857	271168	269595	272858	0.144191	0.626234	0.733771	0.0362226	0.885979	0.712127	1
PM14	C04	Boric Acid	toxic anion	244612	276838	270192	233857	271168	269595	272858	0.144191	0.626234	0.733771	0.0362226	0.885979	0.712127	1
PM14	C05	1-Hydroxy- pyridine-2-thione	Membrane, interferes permeability (Ionophores)	280516	326600	336999	264146	323368	300654	310199	0.0333675	0.232259	0.0479949	0.0356737	0.314828	0.333642	1
PM14	C06	1-Hydroxy- pyridine-2-thione	Membrane, interferes permeability (Ionophores)	280516	326600	336999	264146	323368	300654	310199	0.0333675	0.232259	0.0479949	0.0356737	0.314828	0.333642	1
PM14	C07	1-Hydroxy- pyridine-2-thione	Membrane, interferes permeability (Ionophores)	280516	326600	336999	264146	323368	300654	310199	0.0333675	0.232259	0.0479949	0.0356737	0.314828	0.333642	1
PM14	C08	1-Hydroxy- pyridine-2-thione	Membrane, interferes permeability (Ionophores)	280516	326600	336999	264146	323368	300654	310199	0.0333675	0.232259	0.0479949	0.0356737	0.314828	0.333642	1
PM14	C09	Sodium cyanate	toxic anion	276016	288073	280266	260976	276820	296564	299860	0.248868	0.598277	0.191384	0.112968	0.298877	0.776882	1
PM14	C10	Sodium cyanate	toxic anion	276016	288073	280266	260976	276820	296564	299860	0.248868	0.598277	0.191384	0.112968	0.298877	0.776882	1
PM14	C11	Sodium cyanate	toxic anion	276016	288073	280266	260976	276820	296564	299860	0.248868	0.598277	0.191384	0.112968	0.298877	0.776882	1
PM14	C12	Sodium cyanate	toxic anion	276016	288073	280266	260976	276820	296564	299860	0.248868	0.598277	0.191384	0.112968	0.298877	0.776882	1
PM14	D01	Cadmium chloride	toxic cation	71946.5	89484	83260	55654	71680.5	80033.5	86162	0.114759	0.737465	0.823586	0.0243221	0.233977	0.322002	1
PM14	D02	Cadmium chloride	toxic cation	71946.5	89484	83260	55654	71680.5	80033.5	86162	0.114759	0.737465	0.823586	0.0243221	0.233977	0.322002	1
PM14	D03	Cadmium chloride	toxic cation	71946.5	89484	83260	55654	71680.5	80033.5	86162	0.114759	0.737465	0.823586	0.0243221	0.233977	0.322002	1
PM14	D04	Cadmium chloride	toxic cation	71946.5	89484	83260	55654	71680.5	80033.5	86162	0.114759	0.737465	0.823586	0.0243221	0.233977	0.322002	1
PM14	D05	Iodoacetate	oxidation, sulfhydryl	215558	255194	247627	218994	196068	257886	272600	0.032496	0.360196	0.0183958	0.00474748	0.0103857	0.0445112	1
PM14	D06	Iodoacetate	oxidation, sulfhydryl	215558	255194	247627	218994	196068	257886	272600	0.032496	0.360196	0.0183958	0.00474748	0.0103857	0.0445112	1
PM14	D07	Iodoacetate	oxidation, sulfhydryl	215558	255194	247627	218994	196068	257886	272600	0.032496	0.360196	0.0183958	0.00474748	0.0103857	0.0445112	1
PM14	D08	Iodoacetate	oxidation, sulfhydryl	215558	255194	247627	218994	196068	257886	272600	0.032496	0.360196	0.0183958	0.00474748	0.0103857	0.0445112	1
PM14	D09	Sodium dichromate	toxic anion, SO4 analog	261694	315118	303692	266223	269517	309496	320931	0.0399025	0.574053	0.0915415	0.0485666	0.0702339	0.178995	1
PM14	D10	Sodium dichromate	toxic anion, SO4 analog	261694	315118	303692	266223	269517	309496	320931	0.0399025	0.574053	0.0915415	0.0485666	0.0702339	0.178995	1
PM14	D11	Sodium dichromate	toxic anion, SO4 analog	261694	315118	303692	266223	269517	309496	320931	0.0399025	0.574053	0.0915415	0.0485666	0.0702339	0.178995	1
PM14	D12	Sodium dichromate	toxic anion, SO4 analog	261694	315118	303692	266223	269517	309496	320931	0.0399025	0.574053	0.0915415	0.0485666	0.0702339	0.178995	1
PM14	E01	Cefoxitin	wall, cephalosporin second generation	184112	208767	188226	152220	177764	222497	216804	0.267625	0.528846	0.0100897	0.0573259	0.00490906	0.0785759	1
PM14	E02	Cefoxitin	wall, cephalosporin second generation	184112	208767	188226	152220	177764	222497	216804	0.267625	0.528846	0.0100897	0.0573259	0.00490906	0.0785759	1
PM14	E03	Cefoxitin	wall, cephalosporin second generation	184112	208767	188226	152220	177764	222497	216804	0.267625	0.528846	0.0100897	0.0573259	0.00490906	0.0785759	1
PM14	E04	Cefoxitin	wall, cephalosporin second generation	184112	208767	188226	152220	177764	222497	216804	0.267625	0.528846	0.0100897	0.0573259	0.00490906	0.0785759	1
PM14	E05	Nitrofurantoin	DNA damage, multiple sites, nitrofuran analog	308336	371567	363548	324198	355812	367268	376246	0.00654729	0.184874	0.0699002	0.0212453	0.120808	0.164689	1
PM14	E06	Nitrofurantoin	DNA damage, multiple sites, nitrofuran analog	308336	371567	363548	324198	355812	367268	376246	0.00654729	0.184874	0.0699002	0.0212453	0.120808	0.164689	1
PM14	E07	Nitrofurantoin	DNA damage, multiple sites, nitrofuran analog	308336	371567	363548	324198	355812	367268	376246	0.00654729	0.184874	0.0699002	0.0212453	0.120808	0.164689	1
PM14	E08	Nitrofurantoin	DNA damage, multiple sites, nitrofuran analog	308336	371567	363548	324198	355812	367268	376246	0.00654729	0.184874	0.0699002	0.0212453	0.120808	0.164689	1
PM14	E09	Sodium metaborate	toxic anion	276406	285614	282023	242895	277404	282912	292837	0.538812	0.0746009	0.176021	0.0188865	0.238072	0.0605319	1
PM14	E10	Sodium metaborate	toxic anion	276406	285614	282023	242895	277404	282912	292837	0.538812	0.0746009	0.176021	0.0188865	0.238072	0.0605319	1
PM14	E11	Sodium metaborate	toxic anion	276406	285614	282023	242895	277404	282912	292837	0.538812	0.0746009	0.176021	0.0188865	0.238072	0.0605319	1
PM14	E12	Sodium metaborate	toxic anion	276406	285614	282023	242895	277404	282912	292837	0.538812	0.0746009	0.176021	0.0188865	0.238072	0.0605319	1
PM14	F01	Chloramphenicol	protein synthesis	287838	356373	351319	309356	344036	349467	360026	0.0146257	0.782294	0.456926	0.0309634	0.214323	0.441182	1
PM14	F02	Chloramphenicol	protein synthesis	287838	356373	351319	309356	344036	349467	360026	0.0146257	0.782294	0.456926	0.0309634	0.214323	0.441182	1
PM14	F03	Chloramphenicol	protein synthesis	287838	356373	351319	309356	344036	349467	360026	0.0146257	0.782294	0.456926	0.0309634	0.214323	0.441182	1
PM14	F04	Chloramphenicol	protein synthesis	287838	356373	351319	309356	344036	349467	360026	0.0146257	0.782294	0.456926	0.0309634	0.214323	0.441182	1
PM14	F05	Piperacillin	wall, lactam	307731	371142	364822	325082	354946	363882	375246	0.013108	0.279061	0.028913	0.0195501	0.162003	0.0163144	1
PM14	F06	Piperacillin	wall, lactam	307731	371142	364822	325082	354946	363882	375246	0.013108	0.279061	0.028913	0.0195501	0.162003	0.0163144	1
PM14	F07	Piperacillin	wall, lactam	307731	371142	364822	325082	354946	363882	375246	0.013108	0.279061	0.028913	0.0195501	0.162003	0.0163144	1
PM14	F08	Piperacillin	wall, lactam	307731	371142	364822	325082	354946	363882	375246	0.013108	0.279061	0.028913	0.0195501	0.162003	0.0163144	1
PM14	F09	Sodium metavanadate	toxic anion, PO4 analog	66805	71769	73546.5	63244.5	70537.5	74009	73648.5	0.458521	0.733294	0.984669	0.365834	0.739127	0.954563	1
PM14	F10	Sodium metavanadate	toxic anion, PO4 analog	66805	71769	73546.5	63244.5	70537.5	74009	73648.5	0.458521	0.733294	0.984669	0.365834	0.739127	0.954563	1
PM14	F11	Sodium metavanadate	toxic anion, PO4 analog	66805	71769	73546.5	63244.5	70537.5	74009	73648.5	0.458521	0.733294	0.984669	0.365834	0.739127	0.954563	1
PM14	F12	Sodium metavanadate	toxic anion, PO4 analog	66805	71769	73546.5	63244.5	70537.5	74009	73648.5	0.458521	0.733294	0.984669	0.365834	0.739127	0.954563	1
PM14	G01	Chelerythrine	protein kinase C inhibitor	180057	197524	179808	140236	187428	178422	213004	0.0599427	0.168935	0.0332875	0.00113907	0.143514	0.0050606	1
PM14	G02	Chelerythrine	protein kinase C inhibitor	180057	197524	179808	140236	187428	178422	213004	0.0599427	0.168935	0.0332875	0.00113907	0.143514	0.0050606	1
PM14	G03	Chelerythrine	protein kinase C inhibitor	180057	197524	179808	140236	187428	178422	213004	0.0599427	0.168935	0.0332875	0.00113907	0.143514	0.0050606	1
PM14	G04	Chelerythrine	protein kinase C inhibitor	180057	197524	179808	140236	187428	178422	213004	0.0599427	0.168935	0.0332875	0.00113907	0.143514	0.0050606	1
PM14	G05	Carbenicillin	wall, lactam	104397	169738	172916	68123	197766	163128	165766	0.0376202	0.726991	0.801097	0.0318521	0.0931527	0.82403	1
PM14	G06	Carbenicillin	wall, lactam	104397	169738	172916	68123	197766	163128	165766	0.0376202	0.726991	0.801097	0.0318521	0.0931527	0.82403	1
PM14	G07	Carbenicillin	wall, lactam	104397	169738	172916	68123	197766	163128	165766	0.0376202	0.726991	0.801097	0.0318521	0.0931527	0.82403	1
PM14	G08	Carbenicillin	wall, lactam	104397	169738	172916	68123	197766	163128	165766	0.0376202	0.726991	0.801097	0.0318521	0.0931527	0.82403	1
PM14	G09	Nitrite	toxic anion	224176	263880	258943	220988	238217	269910	262690	0.0486713	0.885526	0.360821	0.0700855	0.130252	0.176844	1
PM14	G10	Nitrite	toxic anion	224176	263880	258943	220988	238217	269910	262690	0.0486713	0.885526	0.360821	0.0700855	0.130252	0.176844	1
PM14	G11	Nitrite	toxic anion	224176	263880	258943	220988	238217	269910	262690	0.0486713	0.885526	0.360821	0.0700855	0.130252	0.176844	1
PM14	G12	Nitrite	toxic anion	224176	263880	258943	220988	238217	269910	262690	0.0486713	0.885526	0.360821	0.0700855	0.130252	0.176844	1
PM14	H01	EGTA	chelator, Ca++	339787	361076	335096	329975	339968	357492	363394	0.138838	0.823343	0.125624	0.0263308	0.075769	0.422626	1
PM14	H02	EGTA	chelator, Ca++	339787	361076	335096	329975	339968	357492	363394	0.138838	0.823343	0.125624	0.0263308	0.075769	0.422626	1
PM14	H03	EGTA	chelator, Ca++	339787	361076	335096	329975	339968	357492	363394	0.138838	0.823343	0.125624	0.0263308	0.075769	0.422626	1
PM14	H04	EGTA	chelator, Ca++	339787	361076	335096	329975	339968	357492	363394	0.138838	0.823343	0.125624	0.0263308	0.075769	0.422626	1
PM14	H05	Promethazine	cyclic nucleotide phosphodiesterase	217862	259808	235298	211328	245208	237100	260762	0.163831	0.949556	0.238763	0.141811	0.530158	0.160744	1
PM14	H06	Promethazine	cyclic nucleotide phosphodiesterase	217862	259808	235298	211328	245208	237100	260762	0.163831	0.949556	0.238763	0.141811	0.530158	0.160744	1
PM14	H07	Promethazine	cyclic nucleotide phosphodiesterase	217862	259808	235298	211328	245208	237100	260762	0.163831	0.949556	0.238763	0.141811	0.530158	0.160744	1
PM14	H08	Promethazine	cyclic nucleotide phosphodiesterase	217862	259808	235298	211328	245208	237100	260762	0.163831	0.949556	0.238763	0.141811	0.530158	0.160744	1
PM14	H09	Sodium orthovanadate	toxic anion, PO4 analog	107948	191468	247798	67304	229473	118274	119859	0.64011	0.361591	0.0109197	0.120163	0.0272951	0.929605	1
PM14	H10	Sodium orthovanadate	toxic anion, PO4 analog	107948	191468	247798	67304	229473	118274	119859	0.64011	0.361591	0.0109197	0.120163	0.0272951	0.929605	1
PM14	H11	Sodium orthovanadate	toxic anion, PO4 analog	107948	191468	247798	67304	229473	118274	119859	0.64011	0.361591	0.0109197	0.120163	0.0272951	0.929605	1
PM14	H12	Sodium orthovanadate	toxic anion, PO4 analog	107948	191468	247798	67304	229473	118274	119859	0.64011	0.361591	0.0109197	0.120163	0.0272951	0.929605	1
PM15	A01	Procaine	ion channal inhibitor, Na+ (m)	340190	355858	337484	333834	347884	355547	368688	0.0653641	0.189994	0.0492937	0.0412697	0.153818	0.177295	1
PM15	A02	Procaine	ion channal inhibitor, Na+ (m)	340190	355858	337484	333834	347884	355547	368688	0.0653641	0.189994	0.0492937	0.0412697	0.153818	0.177295	1
PM15	A03	Procaine	ion channal inhibitor, Na+ (m)	340190	355858	337484	333834	347884	355547	368688	0.0653641	0.189994	0.0492937	0.0412697	0.153818	0.177295	1
PM15	A04	Procaine	ion channal inhibitor, Na+ (m)	340190	355858	337484	333834	347884	355547	368688	0.0653641	0.189994	0.0492937	0.0412697	0.153818	0.177295	1
PM15	A05	Guanidine hydrochloride	membrane, chaotropic agent	245398	270646	278516	231686	269954	244696	282183	0.125141	0.56548	0.828426	0.117393	0.518344	0.328857	1
PM15	A06	Guanidine hydrochloride	membrane, chaotropic agent	245398	270646	278516	231686	269954	244696	282183	0.125141	0.56548	0.828426	0.117393	0.518344	0.328857	1
PM15	A07	Guanidine hydrochloride	membrane, chaotropic agent	245398	270646	278516	231686	269954	244696	282183	0.125141	0.56548	0.828426	0.117393	0.518344	0.328857	1
PM15	A08	Guanidine hydrochloride	membrane, chaotropic agent	245398	270646	278516	231686	269954	244696	282183	0.125141	0.56548	0.828426	0.117393	0.518344	0.328857	1
PM15	A09	Cefmetazole	wall, cephalosporin second generation	231974	264990	250377	180078	218792	209993	273609	0.518512	0.882215	0.728784	0.196421	0.371199	0.314421	1
PM15	A10	Cefmetazole	wall, cephalosporin second generation	231974	264990	250377	180078	218792	209993	273609	0.518512	0.882215	0.728784	0.196421	0.371199	0.314421	1
PM15	A11	Cefmetazole	wall, cephalosporin second generation	231974	264990	250377	180078	218792	209993	273609	0.518512	0.882215	0.728784	0.196421	0.371199	0.314421	1
PM15	A12	Cefmetazole	wall, cephalosporin second generation	231974	264990	250377	180078	218792	209993	273609	0.518512	0.882215	0.728784	0.196421	0.371199	0.314421	1
PM15	B01	D-Cycloserine	wall, sphingolipid synthesis	318464	366134	355260	325282	347020	364096	379430	0.00547771	0.141972	0.021093	0.0340231	0.0852538	0.102417	1
PM15	B02	D-Cycloserine	wall, sphingolipid synthesis	318464	366134	355260	325282	347020	364096	379430	0.00547771	0.141972	0.021093	0.0340231	0.0852538	0.102417	1
PM15	B03	D-Cycloserine	wall, sphingolipid synthesis	318464	366134	355260	325282	347020	364096	379430	0.00547771	0.141972	0.021093	0.0340231	0.0852538	0.102417	1
PM15	B04	D-Cycloserine	wall, sphingolipid synthesis	318464	366134	355260	325282	347020	364096	379430	0.00547771	0.141972	0.021093	0.0340231	0.0852538	0.102417	1
PM15	B05	EDTA	chelator, hydrophilic	203356	295314	290480	251563	294024	288947	318950	0.0185284	0.286501	0.216252	0.0553971	0.316297	0.213031	1
PM15	B06	EDTA	chelator, hydrophilic	203356	295314	290480	251563	294024	288947	318950	0.0185284	0.286501	0.216252	0.0553971	0.316297	0.213031	1
PM15	B07	EDTA	chelator, hydrophilic	203356	295314	290480	251563	294024	288947	318950	0.0185284	0.286501	0.216252	0.0553971	0.316297	0.213031	1
PM15	B08	EDTA	chelator, hydrophilic	203356	295314	290480	251563	294024	288947	318950	0.0185284	0.286501	0.216252	0.0553971	0.316297	0.213031	1
PM15	B09	5,7-Dichloro-8-hydroxy-quinaldine	chelator, lipophilic	299683	275280	256406	186659	265131	319829	315937	0.443627	0.34572	0.21474	0.0050388	0.359936	0.921551	1
PM15	B10	5,7-Dichloro-8-hydroxy-quinaldine	chelator, lipophilic	299683	275280	256406	186659	265131	319829	315937	0.443627	0.34572	0.21474	0.0050388	0.359936	0.921551	1
PM15	B11	5,7-Dichloro-8-hydroxy-quinaldine	chelator, lipophilic	299683	275280	256406	186659	265131	319829	315937	0.443627	0.34572	0.21474	0.0050388	0.359936	0.921551	1
PM15	B12	5,7-Dichloro-8-hydroxy-quinaldine	chelator, lipophilic	299683	275280	256406	186659	265131	319829	315937	0.443627	0.34572	0.21474	0.0050388	0.359936	0.921551	1
PM15	C01	5,7-Dichloro-8-hydroxyquinoline	chelator, lipophilic	290508	367228	360930	307030	346182	363646	373528	0.0060527	0.21982	0.210576	0.0351278	0.171812	0.305198	1
PM15	C02	5,7-Dichloro-8-hydroxyquinoline	chelator, lipophilic	290508	367228	360930	307030	346182	363646	373528	0.0060527	0.21982	0.210576	0.0351278	0.171812	0.305198	1
PM15	C03	5,7-Dichloro-8-hydroxyquinoline	chelator, lipophilic	290508	367228	360930	307030	346182	363646	373528	0.0060527	0.21982	0.210576	0.0351278	0.171812	0.305198	1
PM15	C04	5,7-Dichloro-8-hydroxyquinoline	chelator, lipophilic	290508	367228	360930	307030	346182	363646	373528	0.0060527	0.21982	0.210576	0.0351278	0.171812	0.305198	1
PM15	C05	Fusidic acid	protein synthesis, elongation factor	54345.5	63511	61384.5	53591	66519	64438.5	85426	0.194778	0.30917	0.276304	0.18925	0.362495	0.324655	1
PM15	C06	Fusidic acid	protein synthesis, elongation factor	54345.5	63511	61384.5	53591	66519	64438.5	85426	0.194778	0.30917	0.276304	0.18925	0.362495	0.324655	1
PM15	C07	Fusidic acid	protein synthesis, elongation factor	54345.5	63511	61384.5	53591	66519	64438.5	85426	0.194778	0.30917	0.276304	0.18925	0.362495	0.324655	1
PM15	C08	Fusidic acid	protein synthesis, elongation factor	54345.5	63511	61384.5	53591	66519	64438.5	85426	0.194778	0.30917	0.276304	0.18925	0.362495	0.324655	1
PM15	C09	1,10-Phenanthroline	chelator, Fe++, Zn++, divalent metal ions	194007	257042	267356	225156	243981	248470	269606	0.0542564	0.604339	0.911634	0.296224	0.326398	0.359976	1
PM15	C10	1,10-Phenanthroline	chelator, Fe++, Zn++, divalent metal ions	194007	257042	267356	225156	243981	248470	269606	0.0542564	0.604339	0.911634	0.296224	0.326398	0.359976	1
PM15	C11	1,10-Phenanthroline	chelator, Fe++, Zn++, divalent metal ions	194007	257042	267356	225156	243981	248470	269606	0.0542564	0.604339	0.911634	0.296224	0.326398	0.359976	1
PM15	C12	1,10-Phenanthroline	chelator, Fe++, Zn++, divalent metal ions	194007	257042	267356	225156	243981	248470	269606	0.0542564	0.604339	0.911634	0.296224	0.326398	0.359976	1
PM15	D01	Phleomycin	DNA damage, oxidative, ionizing ratiation	218881	308633	277225	140000	330250	247841	300880	0.138159	0.84536	0.575103	0.0414153	0.485862	0.262769	1
PM15	D02	Phleomycin	DNA damage, oxidative, ionizing ratiation	218881	308633	277225	140000	330250	247841	300880	0.138159	0.84536	0.575103	0.0414153	0.485862	0.262769	1
PM15	D03	Phleomycin	DNA damage, oxidative, ionizing ratiation	218881	308633	277225	140000	330250	247841	300880	0.138159	0.84536	0.575103	0.0414153	0.485862	0.262769	1
PM15	D04	Phleomycin	DNA damage, oxidative, ionizing ratiation	218881	308633	277225	140000	330250	247841	300880	0.138159	0.84536	0.575103	0.0414153	0.485862	0.262769	1
PM15	D05	Domiphen bromide	membrane, detergent, cationic, fungiside	130170	172588	131901	74942.5	191496	126866	209546	0.0655363	0.452329	0.00297418	0.0139586	0.053663	0.00361971	1
PM15	D06	Domiphen bromide	membrane, detergent, cationic, fungiside	130170	172588	131901	74942.5	191496	126866	209546	0.0655363	0.452329	0.00297418	0.0139586	0.053663	0.00361971	1
PM15	D07	Domiphen bromide	membrane, detergent, cationic, fungiside	130170	172588	131901	74942.5	191496	126866	209546	0.0655363	0.452329	0.00297418	0.0139586	0.053663	0.00361971	1
PM15	D08	Domiphen bromide	membrane, detergent, cationic, fungiside	130170	172588	131901	74942.5	191496	126866	209546	0.0655363	0.452329	0.00297418	0.0139586	0.053663	0.00361971	1
PM15	D09	Nordihydroguaiaretic acid	lipoxygenase, fungicide	301084	371156	374632	351003	361798	375754	381034	0.00367064	0.230577	0.515964	0.0767257	0.249306	0.195206	1
PM15	D10	Nordihydroguaiaretic acid	lipoxygenase, fungicide	301084	371156	374632	351003	361798	375754	381034	0.00367064	0.230577	0.515964	0.0767257	0.249306	0.195206	1
PM15	D11	Nordihydroguaiaretic acid	lipoxygenase, fungicide	301084	371156	374632	351003	361798	375754	381034	0.00367064	0.230577	0.515964	0.0767257	0.249306	0.195206	1
PM15	D12	Nordihydroguaiaretic acid	lipoxygenase, fungicide	301084	371156	374632	351003	361798	375754	381034	0.00367064	0.230577	0.515964	0.0767257	0.249306	0.195206	1
PM15	E01	Alexidine	membrane, biguanide, electron transport	305473	323452	332423	173417	262330	299837	317778	0.827995	0.91976	0.796528	0.102936	0.384096	0.791229	1
PM15	E02	Alexidine	membrane, biguanide, electron transport	305473	323452	332423	173417	262330	299837	317778	0.827995	0.91976	0.796528	0.102936	0.384096	0.791229	1
PM15	E03	Alexidine	membrane, biguanide, electron transport	305473	323452	332423	173417	262330	299837	317778	0.827995	0.91976	0.796528	0.102936	0.384096	0.791229	1
PM15	E04	Alexidine	membrane, biguanide, electron transport	305473	323452	332423	173417	262330	299837	317778	0.827995	0.91976	0.796528	0.102936	0.384096	0.791229	1
PM15	E05	Nitrofurazone	DNA damage, multiple sites, nitrofuran analog	298286	365889	354991	254162	346108	310740	374030	0.0167655	0.49564	0.192806	0.00720862	0.149151	0.14451	1
PM15	E06	Nitrofurazone	DNA damage, multiple sites, nitrofuran analog	298286	365889	354991	254162	346108	310740	374030	0.0167655	0.49564	0.192806	0.00720862	0.149151	0.14451	1
PM15	E07	Nitrofurazone	DNA damage, multiple sites, nitrofuran analog	298286	365889	354991	254162	346108	310740	374030	0.0167655	0.49564	0.192806	0.00720862	0.149151	0.14451	1
PM15	E08	Nitrofurazone	DNA damage, multiple sites, nitrofuran analog	298286	365889	354991	254162	346108	310740	374030	0.0167655	0.49564	0.192806	0.00720862	0.149151	0.14451	1
PM15	E09	Methyl viologen	oxidizing agent	289817	344810	349660	297749	328819	334852	342533	0.0115427	0.825799	0.375645	0.0181168	0.313503	0.410348	1
PM15	E10	Methyl viologen	oxidizing agent	289817	344810	349660	297749	328819	334852	342533	0.0115427	0.825799	0.375645	0.0181168	0.313503	0.410348	1
PM15	E11	Methyl viologen	oxidizing agent	289817	344810	349660	297749	328819	334852	342533	0.0115427	0.825799	0.375645	0.0181168	0.313503	0.410348	1
PM15	E12	Methyl viologen	oxidizing agent	289817	344810	349660	297749	328819	334852	342533	0.0115427	0.825799	0.375645	0.0181168	0.313503	0.410348	1
PM15	F01	3, 4-Dimethoxybenzyl alcohol	oxidizing agent, free radical-peroxidase substrate	317463	361782	342820	313449	337435	357008	375038	0.0413303	0.386525	0.12684	0.0373246	0.107831	0.272489	1
PM15	F02	3, 4-Dimethoxybenzyl alcohol	oxidizing agent, free radical-peroxidase substrate	317463	361782	342820	313449	337435	357008	375038	0.0413303	0.386525	0.12684	0.0373246	0.107831	0.272489	1
PM15	F03	3, 4-Dimethoxybenzyl alcohol	oxidizing agent, free radical-peroxidase substrate	317463	361782	342820	313449	337435	357008	375038	0.0413303	0.386525	0.12684	0.0373246	0.107831	0.272489	1
PM15	F04	3, 4-Dimethoxybenzyl alcohol	oxidizing agent, free radical-peroxidase substrate	317463	361782	342820	313449	337435	357008	375038	0.0413303	0.386525	0.12684	0.0373246	0.107831	0.272489	1
PM15	F05	Oleandomycin	protein synthesis, 50S ribosomal subunit, macrolide	54245	81063.5	66755.5	63989	78057	64935.5	131618	0.207912	0.369195	0.266423	0.259645	0.33318	0.25369	1
PM15	F06	Oleandomycin	protein synthesis, 50S ribosomal subunit, macrolide	54245	81063.5	66755.5	63989	78057	64935.5	131618	0.207912	0.369195	0.266423	0.259645	0.33318	0.25369	1
PM15	F07	Oleandomycin	protein synthesis, 50S ribosomal subunit, macrolide	54245	81063.5	66755.5	63989	78057	64935.5	131618	0.207912	0.369195	0.266423	0.259645	0.33318	0.25369	1
PM15	F08	Oleandomycin	protein synthesis, 50S ribosomal subunit, macrolide	54245	81063.5	66755.5	63989	78057	64935.5	131618	0.207912	0.369195	0.266423	0.259645	0.33318	0.25369	1
PM15	F09	Puromycin	protein synthesis, 30S ribosomal subunit, premature chanin termination	190767	228060	200750	129511	230869	197880	226514	0.162436	0.939908	0.275372	0.033906	0.867872	0.224934	1
PM15	F10	Puromycin	protein synthesis, 30S ribosomal subunit, premature chanin termination	190767	228060	200750	129511	230869	197880	226514	0.162436	0.939908	0.275372	0.033906	0.867872	0.224934	1
PM15	F11	Puromycin	protein synthesis, 30S ribosomal subunit, premature chanin termination	190767	228060	200750	129511	230869	197880	226514	0.162436	0.939908	0.275372	0.033906	0.867872	0.224934	1
PM15	F12	Puromycin	protein synthesis, 30S ribosomal subunit, premature chanin termination	190767	228060	200750	129511	230869	197880	226514	0.162436	0.939908	0.275372	0.033906	0.867872	0.224934	1
PM15	G01	CCCP	respiration, ionophore, H+	160717	139776	105731	150588	102382	168712	172634	0.406278	0.493428	0.0369586	0.280089	0.0311357	0.77963	1
PM15	G02	CCCP	respiration, ionophore, H+	160717	139776	105731	150588	102382	168712	172634	0.406278	0.493428	0.0369586	0.280089	0.0311357	0.77963	1
PM15	G03	CCCP	respiration, ionophore, H+	160717	139776	105731	150588	102382	168712	172634	0.406278	0.493428	0.0369586	0.280089	0.0311357	0.77963	1
PM15	G04	CCCP	respiration, ionophore, H+	160717	139776	105731	150588	102382	168712	172634	0.406278	0.493428	0.0369586	0.280089	0.0311357	0.77963	1
PM15	G05	Sodium azide	respiration, uncoupler	158460	219751	211884	137448	208555	197299	250858	0.10767	0.428563	0.334499	0.070312	0.318058	0.217193	1
PM15	G06	Sodium azide	respiration, uncoupler	158460	219751	211884	137448	208555	197299	250858	0.10767	0.428563	0.334499	0.070312	0.318058	0.217193	1
PM15	G07	Sodium azide	respiration, uncoupler	158460	219751	211884	137448	208555	197299	250858	0.10767	0.428563	0.334499	0.070312	0.318058	0.217193	1
PM15	G08	Sodium azide	respiration, uncoupler	158460	219751	211884	137448	208555	197299	250858	0.10767	0.428563	0.334499	0.070312	0.318058	0.217193	1
PM15	G09	Menadione	respiration, uncoupler	228976	260557	249085	150320	253038	237464	275550	0.272573	0.693781	0.483214	0.0761492	0.547353	0.35227	1
PM15	G10	Menadione	respiration, uncoupler	228976	260557	249085	150320	253038	237464	275550	0.272573	0.693781	0.483214	0.0761492	0.547353	0.35227	1
PM15	G11	Menadione	respiration, uncoupler	228976	260557	249085	150320	253038	237464	275550	0.272573	0.693781	0.483214	0.0761492	0.547353	0.35227	1
PM15	G12	Menadione	respiration, uncoupler	228976	260557	249085	150320	253038	237464	275550	0.272573	0.693781	0.483214	0.0761492	0.547353	0.35227	1
PM15	H01	2-Nitroimidazole	ribonucleotide DP reductase	224977	309398	271787	233675	267281	279716	298095	0.154707	0.675647	0.0657187	0.0337736	0.18117	0.101128	1
PM15	H02	2-Nitroimidazole	ribonucleotide DP reductase	224977	309398	271787	233675	267281	279716	298095	0.154707	0.675647	0.0657187	0.0337736	0.18117	0.101128	1
PM15	H03	2-Nitroimidazole	ribonucleotide DP reductase	224977	309398	271787	233675	267281	279716	298095	0.154707	0.675647	0.0657187	0.0337736	0.18117	0.101128	1
PM15	H04	2-Nitroimidazole	ribonucleotide DP reductase	224977	309398	271787	233675	267281	279716	298095	0.154707	0.675647	0.0657187	0.0337736	0.18117	0.101128	1
PM15	H05	Hydroxyurea	ribonucleotide DP reductase, antifolate (inhibits thymine and methionine synthesis)	280870	296608	285226	242338	285138	268118	306444	0.409692	0.438836	0.225738	0.0813099	0.273591	0.132291	1
PM15	H06	Hydroxyurea	ribonucleotide DP reductase, antifolate (inhibits thymine and methionine synthesis)	280870	296608	285226	242338	285138	268118	306444	0.409692	0.438836	0.225738	0.0813099	0.273591	0.132291	1
PM15	H07	Hydroxyurea	ribonucleotide DP reductase, antifolate (inhibits thymine and methionine synthesis)	280870	296608	285226	242338	285138	268118	306444	0.409692	0.438836	0.225738	0.0813099	0.273591	0.132291	1
PM15	H08	Hydroxyurea	ribonucleotide DP reductase, antifolate (inhibits thymine and methionine synthesis)	280870	296608	285226	242338	285138	268118	306444	0.409692	0.438836	0.225738	0.0813099	0.273591	0.132291	1
PM15	H09	Zinc chloride	toxic cation	294032	341494	340040	315478	306382	339508	351984	0.0317047	0.501323	0.294202	0.13224	0.167376	0.422382	1
PM15	H10	Zinc chloride	toxic cation	294032	341494	340040	315478	306382	339508	351984	0.0317047	0.501323	0.294202	0.13224	0.167376	0.422382	1
PM15	H11	Zinc chloride	toxic cation	294032	341494	340040	315478	306382	339508	351984	0.0317047	0.501323	0.294202	0.13224	0.167376	0.422382	1
PM15	H12	Zinc chloride	toxic cation	294032	341494	340040	315478	306382	339508	351984	0.0317047	0.501323	0.294202	0.13224	0.167376	0.422382	1
PM16	A01	Cefotaxime	wall, cephalosporin third generation	335771	320916	261210	285034	224841	361666	373920	0.0100162	0.416833	0.00461497	0.0949098	0.00463734	0.141024	1
PM16	A02	Cefotaxime	wall, cephalosporin third generation	335771	320916	261210	285034	224841	361666	373920	0.0100162	0.416833	0.00461497	0.0949098	0.00463734	0.141024	1
PM16	A03	Cefotaxime	wall, cephalosporin third generation	335771	320916	261210	285034	224841	361666	373920	0.0100162	0.416833	0.00461497	0.0949098	0.00463734	0.141024	1
PM16	A04	Cefotaxime	wall, cephalosporin third generation	335771	320916	261210	285034	224841	361666	373920	0.0100162	0.416833	0.00461497	0.0949098	0.00463734	0.141024	1
PM16	A05	Phosphomycin	wall	338004	381466	381314	337734	374176	381783	387394	0.0121528	0.483306	0.436604	0.0692856	0.255305	0.360359	1
PM16	A06	Phosphomycin	wall	338004	381466	381314	337734	374176	381783	387394	0.0121528	0.483306	0.436604	0.0692856	0.255305	0.360359	1
PM16	A07	Phosphomycin	wall	338004	381466	381314	337734	374176	381783	387394	0.0121528	0.483306	0.436604	0.0692856	0.255305	0.360359	1
PM16	A08	Phosphomycin	wall	338004	381466	381314	337734	374176	381783	387394	0.0121528	0.483306	0.436604	0.0692856	0.255305	0.360359	1
PM16	A09	5-Chloro-7-iodo-8-hydroxyquinoline	chelator, lipophilic	334184	378429	381366	280684	380184	377058	384547	0.0160919	0.146557	0.467853	0.00816402	0.444422	0.21268	1
PM16	A10	5-Chloro-7-iodo-8-hydroxyquinoline	chelator, lipophilic	334184	378429	381366	280684	380184	377058	384547	0.0160919	0.146557	0.467853	0.00816402	0.444422	0.21268	1
PM16	A11	5-Chloro-7-iodo-8-hydroxyquinoline	chelator, lipophilic	334184	378429	381366	280684	380184	377058	384547	0.0160919	0.146557	0.467853	0.00816402	0.444422	0.21268	1
PM16	A12	5-Chloro-7-iodo-8-hydroxyquinoline	chelator, lipophilic	334184	378429	381366	280684	380184	377058	384547	0.0160919	0.146557	0.467853	0.00816402	0.444422	0.21268	1
PM16	B01	Norfloxacin	DNA unwinding, gyrase (GN), topoisomerase (GP), fluoroquinolone	326278	373308	369398	246486	364001	368486	377663	0.0294024	0.653247	0.36879	0.276562	0.364104	0.467597	1
PM16	B02	Norfloxacin	DNA unwinding, gyrase (GN), topoisomerase (GP), fluoroquinolone	326278	373308	369398	246486	364001	368486	377663	0.0294024	0.653247	0.36879	0.276562	0.364104	0.467597	1
PM16	B03	Norfloxacin	DNA unwinding, gyrase (GN), topoisomerase (GP), fluoroquinolone	326278	373308	369398	246486	364001	368486	377663	0.0294024	0.653247	0.36879	0.276562	0.364104	0.467597	1
PM16	B04	Norfloxacin	DNA unwinding, gyrase (GN), topoisomerase (GP), fluoroquinolone	326278	373308	369398	246486	364001	368486	377663	0.0294024	0.653247	0.36879	0.276562	0.364104	0.467597	1
PM16	B05	Sulfanilamide	folate synthesis, PABA analog	317108	366344	371576	201068	365977	347502	363424	0.0274786	0.702462	0.0448056	0.186567	0.771225	0.00185009	1
PM16	B06	Sulfanilamide	folate synthesis, PABA analog	317108	366344	371576	201068	365977	347502	363424	0.0274786	0.702462	0.0448056	0.186567	0.771225	0.00185009	1
PM16	B07	Sulfanilamide	folate synthesis, PABA analog	317108	366344	371576	201068	365977	347502	363424	0.0274786	0.702462	0.0448056	0.186567	0.771225	0.00185009	1
PM16	B08	Sulfanilamide	folate synthesis, PABA analog	317108	366344	371576	201068	365977	347502	363424	0.0274786	0.702462	0.0448056	0.186567	0.771225	0.00185009	1
PM16	B09	Trimethoprim	folate synthesis, dihyldrofolate reductase inhibitor	268032	258189	235256	246334	243885	291260	298654	0.307245	0.444725	0.0123725	0.0494121	0.242911	0.215769	1
PM16	B10	Trimethoprim	folate synthesis, dihyldrofolate reductase inhibitor	268032	258189	235256	246334	243885	291260	298654	0.307245	0.444725	0.0123725	0.0494121	0.242911	0.215769	1
PM16	B11	Trimethoprim	folate synthesis, dihyldrofolate reductase inhibitor	268032	258189	235256	246334	243885	291260	298654	0.307245	0.444725	0.0123725	0.0494121	0.242911	0.215769	1
PM16	B12	Trimethoprim	folate synthesis, dihyldrofolate reductase inhibitor	268032	258189	235256	246334	243885	291260	298654	0.307245	0.444725	0.0123725	0.0494121	0.242911	0.215769	1
PM16	C01	Dichlofluanid	fungicide, phenylsulphamide	221515	208478	313414	54270	274202	172640	219111	0.982842	0.925854	0.380158	0.159386	0.540667	0.748598	1
PM16	C02	Dichlofluanid	fungicide, phenylsulphamide	221515	208478	313414	54270	274202	172640	219111	0.982842	0.925854	0.380158	0.159386	0.540667	0.748598	1
PM16	C03	Dichlofluanid	fungicide, phenylsulphamide	221515	208478	313414	54270	274202	172640	219111	0.982842	0.925854	0.380158	0.159386	0.540667	0.748598	1
PM16	C04	Dichlofluanid	fungicide, phenylsulphamide	221515	208478	313414	54270	274202	172640	219111	0.982842	0.925854	0.380158	0.159386	0.540667	0.748598	1
PM16	C05	Protamine sulfate	membrane, nonspecific binding	253628	265404	341675	90604	300374	203274	194545	0.322767	0.35602	0.125255	0.22754	0.147073	0.876931	1
PM16	C06	Protamine sulfate	membrane, nonspecific binding	253628	265404	341675	90604	300374	203274	194545	0.322767	0.35602	0.125255	0.22754	0.147073	0.876931	1
PM16	C07	Protamine sulfate	membrane, nonspecific binding	253628	265404	341675	90604	300374	203274	194545	0.322767	0.35602	0.125255	0.22754	0.147073	0.876931	1
PM16	C08	Protamine sulfate	membrane, nonspecific binding	253628	265404	341675	90604	300374	203274	194545	0.322767	0.35602	0.125255	0.22754	0.147073	0.876931	1
PM16	C09	Cetylpyridinium chloride	membrane, detergent, cationic	304463	291803	318152	194826	286249	332616	321522	0.508624	0.321765	0.915254	0.0289957	0.315838	0.632682	1
PM16	C10	Cetylpyridinium chloride	membrane, detergent, cationic	304463	291803	318152	194826	286249	332616	321522	0.508624	0.321765	0.915254	0.0289957	0.315838	0.632682	1
PM16	C11	Cetylpyridinium chloride	membrane, detergent, cationic	304463	291803	318152	194826	286249	332616	321522	0.508624	0.321765	0.915254	0.0289957	0.315838	0.632682	1
PM16	C12	Cetylpyridinium chloride	membrane, detergent, cationic	304463	291803	318152	194826	286249	332616	321522	0.508624	0.321765	0.915254	0.0289957	0.315838	0.632682	1
PM16	D01	1-Chloro-2,4-dinitrobenzene	oxidation, glutathione	269406	237312	243322	123630	269072	266808	242482	0.24152	0.671319	0.947835	0.0720133	0.567425	0.631462	1
PM16	D02	1-Chloro-2,4-dinitrobenzene	oxidation, glutathione	269406	237312	243322	123630	269072	266808	242482	0.24152	0.671319	0.947835	0.0720133	0.567425	0.631462	1
PM16	D03	1-Chloro-2,4-dinitrobenzene	oxidation, glutathione	269406	237312	243322	123630	269072	266808	242482	0.24152	0.671319	0.947835	0.0720133	0.567425	0.631462	1
PM16	D04	1-Chloro-2,4-dinitrobenzene	oxidation, glutathione	269406	237312	243322	123630	269072	266808	242482	0.24152	0.671319	0.947835	0.0720133	0.567425	0.631462	1
PM16	D05	Diamide	oxidation, glutathione	318658	368858	356533	236433	356512	355147	376282	0.0407159	0.622933	0.28512	0.0546886	0.359865	0.219376	1
PM16	D06	Diamide	oxidation, glutathione	318658	368858	356533	236433	356512	355147	376282	0.0407159	0.622933	0.28512	0.0546886	0.359865	0.219376	1
PM16	D07	Diamide	oxidation, glutathione	318658	368858	356533	236433	356512	355147	376282	0.0407159	0.622933	0.28512	0.0546886	0.359865	0.219376	1
PM16	D08	Diamide	oxidation, glutathione	318658	368858	356533	236433	356512	355147	376282	0.0407159	0.622933	0.28512	0.0546886	0.359865	0.219376	1
PM16	D09	Cinoxacin	DNA unwinding, gyrase (GN), topoisomerase (GP), quinolone	251848	339390	299132	243654	305584	304011	344112	0.0297221	0.783498	0.0737573	0.0181404	0.440039	0.121408	1
PM16	D10	Cinoxacin	DNA unwinding, gyrase (GN), topoisomerase (GP), quinolone	251848	339390	299132	243654	305584	304011	344112	0.0297221	0.783498	0.0737573	0.0181404	0.440039	0.121408	1
PM16	D11	Cinoxacin	DNA unwinding, gyrase (GN), topoisomerase (GP), quinolone	251848	339390	299132	243654	305584	304011	344112	0.0297221	0.783498	0.0737573	0.0181404	0.440039	0.121408	1
PM16	D12	Cinoxacin	DNA unwinding, gyrase (GN), topoisomerase (GP), quinolone	251848	339390	299132	243654	305584	304011	344112	0.0297221	0.783498	0.0737573	0.0181404	0.440039	0.121408	1
PM16	E01	Streptomycin	protein synthesis, 30S ribosomal subunit, aminoglycoside	328406	366476	357394	231873	359951	366002	373097	0.0164178	0.380858	0.440675	0.0360508	0.172389	0.382526	1
PM16	E02	Streptomycin	protein synthesis, 30S ribosomal subunit, aminoglycoside	328406	366476	357394	231873	359951	366002	373097	0.0164178	0.380858	0.440675	0.0360508	0.172389	0.382526	1
PM16	E03	Streptomycin	protein synthesis, 30S ribosomal subunit, aminoglycoside	328406	366476	357394	231873	359951	366002	373097	0.0164178	0.380858	0.440675	0.0360508	0.172389	0.382526	1
PM16	E04	Streptomycin	protein synthesis, 30S ribosomal subunit, aminoglycoside	328406	366476	357394	231873	359951	366002	373097	0.0164178	0.380858	0.440675	0.0360508	0.172389	0.382526	1
PM16	E05	5-Azacytidine	DNA methylation, methyltransferase inhibitor	323983	381652	372670	325474	366462	376682	383514	0.0108614	0.734357	0.13539	0.0364156	0.192323	0.169422	1
PM16	E06	5-Azacytidine	DNA methylation, methyltransferase inhibitor	323983	381652	372670	325474	366462	376682	383514	0.0108614	0.734357	0.13539	0.0364156	0.192323	0.169422	1
PM16	E07	5-Azacytidine	DNA methylation, methyltransferase inhibitor	323983	381652	372670	325474	366462	376682	383514	0.0108614	0.734357	0.13539	0.0364156	0.192323	0.169422	1
PM16	E08	5-Azacytidine	DNA methylation, methyltransferase inhibitor	323983	381652	372670	325474	366462	376682	383514	0.0108614	0.734357	0.13539	0.0364156	0.192323	0.169422	1
PM16	E09	Rifamycin SV	RNA polymerase	149984	169368	162932	149854	169403	187745	166207	0.121212	0.590876	0.704951	0.221354	0.609204	0.535683	1
PM16	E10	Rifamycin SV	RNA polymerase	149984	169368	162932	149854	169403	187745	166207	0.121212	0.590876	0.704951	0.221354	0.609204	0.535683	1
PM16	E11	Rifamycin SV	RNA polymerase	149984	169368	162932	149854	169403	187745	166207	0.121212	0.590876	0.704951	0.221354	0.609204	0.535683	1
PM16	E12	Rifamycin SV	RNA polymerase	149984	169368	162932	149854	169403	187745	166207	0.121212	0.590876	0.704951	0.221354	0.609204	0.535683	1
PM16	F01	Potassium tellurite	toxic anion	323292	371390	369684	312022	344634	370044	376378	0.0158355	0.287635	0.53662	0.0875373	0.00731579	0.21781	1
PM16	F02	Potassium tellurite	toxic anion	323292	371390	369684	312022	344634	370044	376378	0.0158355	0.287635	0.53662	0.0875373	0.00731579	0.21781	1
PM16	F03	Potassium tellurite	toxic anion	323292	371390	369684	312022	344634	370044	376378	0.0158355	0.287635	0.53662	0.0875373	0.00731579	0.21781	1
PM16	F04	Potassium tellurite	toxic anion	323292	371390	369684	312022	344634	370044	376378	0.0158355	0.287635	0.53662	0.0875373	0.00731579	0.21781	1
PM16	F05	Sodium selenite	toxic anion	184718	285492	245798	101310	272286	319362	327877	0.110692	0.563609	0.155142	0.0268928	0.457638	0.835666	1
PM16	F06	Sodium selenite	toxic anion	184718	285492	245798	101310	272286	319362	327877	0.110692	0.563609	0.155142	0.0268928	0.457638	0.835666	1
PM16	F07	Sodium selenite	toxic anion	184718	285492	245798	101310	272286	319362	327877	0.110692	0.563609	0.155142	0.0268928	0.457638	0.835666	1
PM16	F08	Sodium selenite	toxic anion	184718	285492	245798	101310	272286	319362	327877	0.110692	0.563609	0.155142	0.0268928	0.457638	0.835666	1
PM16	F09	Aluminum sulfate	toxic cation	312158	360745	350185	320608	345534	357344	362891	0.0227689	0.797837	0.431378	0.0221636	0.111853	0.645218	1
PM16	F10	Aluminum sulfate	toxic cation	312158	360745	350185	320608	345534	357344	362891	0.0227689	0.797837	0.431378	0.0221636	0.111853	0.645218	1
PM16	F11	Aluminum sulfate	toxic cation	312158	360745	350185	320608	345534	357344	362891	0.0227689	0.797837	0.431378	0.0221636	0.111853	0.645218	1
PM16	F12	Aluminum sulfate	toxic cation	312158	360745	350185	320608	345534	357344	362891	0.0227689	0.797837	0.431378	0.0221636	0.111853	0.645218	1
PM16	G01	Chromium chloride	toxic cation	329148	370660	367082	334938	348854	369838	374566	8.68991e-05	0.00520347	0.302751	0.0278936	0.120455	0.138239	1
PM16	G02	Chromium chloride	toxic cation	329148	370660	367082	334938	348854	369838	374566	8.68991e-05	0.00520347	0.302751	0.0278936	0.120455	0.138239	1
PM16	G03	Chromium chloride	toxic cation	329148	370660	367082	334938	348854	369838	374566	8.68991e-05	0.00520347	0.302751	0.0278936	0.120455	0.138239	1
PM16	G04	Chromium chloride	toxic cation	329148	370660	367082	334938	348854	369838	374566	8.68991e-05	0.00520347	0.302751	0.0278936	0.120455	0.138239	1
PM16	G05	Ferric chloride	toxic cation	359025	365874	349683	297389	355776	397550	396316	0.130866	0.40699	0.0127517	0.0132934	0.215311	0.810554	1
PM16	G06	Ferric chloride	toxic cation	359025	365874	349683	297389	355776	397550	396316	0.130866	0.40699	0.0127517	0.0132934	0.215311	0.810554	1
PM16	G07	Ferric chloride	toxic cation	359025	365874	349683	297389	355776	397550	396316	0.130866	0.40699	0.0127517	0.0132934	0.215311	0.810554	1
PM16	G08	Ferric chloride	toxic cation	359025	365874	349683	297389	355776	397550	396316	0.130866	0.40699	0.0127517	0.0132934	0.215311	0.810554	1
PM16	G09	L-Glutamic acid g-hydroxamate	tRNA synthetase	312350	365563	352558	321114	353300	356274	368532	0.000584068	0.15081	0.176471	0.00109124	0.109401	0.0633273	1
PM16	G10	L-Glutamic acid g-hydroxamate	tRNA synthetase	312350	365563	352558	321114	353300	356274	368532	0.000584068	0.15081	0.176471	0.00109124	0.109401	0.0633273	1
PM16	G11	L-Glutamic acid g-hydroxamate	tRNA synthetase	312350	365563	352558	321114	353300	356274	368532	0.000584068	0.15081	0.176471	0.00109124	0.109401	0.0633273	1
PM16	G12	L-Glutamic acid g-hydroxamate	tRNA synthetase	312350	365563	352558	321114	353300	356274	368532	0.000584068	0.15081	0.176471	0.00109124	0.109401	0.0633273	1
PM16	H01	Glycine hydroxamate	tRNA synthetase	309576	348272	329759	265304	339564	335551	349478	0.0316148	0.76617	0.0594862	0.00372118	0.136942	0.0943157	1
PM16	H02	Glycine hydroxamate	tRNA synthetase	309576	348272	329759	265304	339564	335551	349478	0.0316148	0.76617	0.0594862	0.00372118	0.136942	0.0943157	1
PM16	H03	Glycine hydroxamate	tRNA synthetase	309576	348272	329759	265304	339564	335551	349478	0.0316148	0.76617	0.0594862	0.00372118	0.136942	0.0943157	1
PM16	H04	Glycine hydroxamate	tRNA synthetase	309576	348272	329759	265304	339564	335551	349478	0.0316148	0.76617	0.0594862	0.00372118	0.136942	0.0943157	1
PM16	H05	Chloroxylenol	fungicide	271206	259922	262272	212621	290350	363595	312334	0.715405	0.596571	0.59324	0.361734	0.864042	0.58033	1
PM16	H06	Chloroxylenol	fungicide	271206	259922	262272	212621	290350	363595	312334	0.715405	0.596571	0.59324	0.361734	0.864042	0.58033	1
PM16	H07	Chloroxylenol	fungicide	271206	259922	262272	212621	290350	363595	312334	0.715405	0.596571	0.59324	0.361734	0.864042	0.58033	1
PM16	H08	Chloroxylenol	fungicide	271206	259922	262272	212621	290350	363595	312334	0.715405	0.596571	0.59324	0.361734	0.864042	0.58033	1
PM16	H09	Sorbic Acid	respiration, ionophore, H+	325979	364207	352704	325507	361308	357396	368997	0.0516207	0.619034	0.0937101	0.0252143	0.59468	0.143186	1
PM16	H10	Sorbic Acid	respiration, ionophore, H+	325979	364207	352704	325507	361308	357396	368997	0.0516207	0.619034	0.0937101	0.0252143	0.59468	0.143186	1
PM16	H11	Sorbic Acid	respiration, ionophore, H+	325979	364207	352704	325507	361308	357396	368997	0.0516207	0.619034	0.0937101	0.0252143	0.59468	0.143186	1
PM16	H12	Sorbic Acid	respiration, ionophore, H+	325979	364207	352704	325507	361308	357396	368997	0.0516207	0.619034	0.0937101	0.0252143	0.59468	0.143186	1
PM17	A01	D-Serine	inhibits 3PGA dehydrogenase (L-serine and pantothenate synthesis)	154300	197419	180566	113786	200446	171842	187364	0.0586212	0.543142	0.54083	0.0135227	0.36079	0.415542	1
PM17	A02	D-Serine	inhibits 3PGA dehydrogenase (L-serine and pantothenate synthesis)	154300	197419	180566	113786	200446	171842	187364	0.0586212	0.543142	0.54083	0.0135227	0.36079	0.415542	1
PM17	A03	D-Serine	inhibits 3PGA dehydrogenase (L-serine and pantothenate synthesis)	154300	197419	180566	113786	200446	171842	187364	0.0586212	0.543142	0.54083	0.0135227	0.36079	0.415542	1
PM17	A04	D-Serine	inhibits 3PGA dehydrogenase (L-serine and pantothenate synthesis)	154300	197419	180566	113786	200446	171842	187364	0.0586212	0.543142	0.54083	0.0135227	0.36079	0.415542	1
PM17	A05	b-Chloro-L-alanine	aa analog, alanine, aminotransferase inhibitor	269444	280756	267721	220068	255934	270052	287360	0.145036	0.764346	0.248747	0.0377476	0.0544172	0.207291	1
PM17	A06	b-Chloro-L-alanine	aa analog, alanine, aminotransferase inhibitor	269444	280756	267721	220068	255934	270052	287360	0.145036	0.764346	0.248747	0.0377476	0.0544172	0.207291	1
PM17	A07	b-Chloro-L-alanine	aa analog, alanine, aminotransferase inhibitor	269444	280756	267721	220068	255934	270052	287360	0.145036	0.764346	0.248747	0.0377476	0.0544172	0.207291	1
PM17	A08	b-Chloro-L-alanine	aa analog, alanine, aminotransferase inhibitor	269444	280756	267721	220068	255934	270052	287360	0.145036	0.764346	0.248747	0.0377476	0.0544172	0.207291	1
PM17	A09	Thiosalicylate	anti-capsule	343000	378164	371687	347036	366988	375889	379006	0.00975091	0.927719	0.180927	0.0584029	0.0154733	0.145958	1
PM17	A10	Thiosalicylate	anti-capsule	343000	378164	371687	347036	366988	375889	379006	0.00975091	0.927719	0.180927	0.0584029	0.0154733	0.145958	1
PM17	A11	Thiosalicylate	anti-capsule	343000	378164	371687	347036	366988	375889	379006	0.00975091	0.927719	0.180927	0.0584029	0.0154733	0.145958	1
PM17	A12	Thiosalicylate	anti-capsule	343000	378164	371687	347036	366988	375889	379006	0.00975091	0.927719	0.180927	0.0584029	0.0154733	0.145958	1
PM17	B01	2-Hydroxybenzoic acid	anti-capsule, biofilm inhibition, mar inducer	201500	261025	261092	184136	236959	256386	266390	0.0045776	0.688119	0.490848	0.000595534	0.0110722	0.0212957	1
PM17	B02	2-Hydroxybenzoic acid	anti-capsule, biofilm inhibition, mar inducer	201500	261025	261092	184136	236959	256386	266390	0.0045776	0.688119	0.490848	0.000595534	0.0110722	0.0212957	1
PM17	B03	2-Hydroxybenzoic acid	anti-capsule, biofilm inhibition, mar inducer	201500	261025	261092	184136	236959	256386	266390	0.0045776	0.688119	0.490848	0.000595534	0.0110722	0.0212957	1
PM17	B04	2-Hydroxybenzoic acid	anti-capsule, biofilm inhibition, mar inducer	201500	261025	261092	184136	236959	256386	266390	0.0045776	0.688119	0.490848	0.000595534	0.0110722	0.0212957	1
PM17	B05	Hygromycin B	protein synthesis, aminoglycoside	318102	374904	373037	335766	362009	372124	378793	0.00106521	0.568633	0.343655	0.0446105	0.172011	0.174746	1
PM17	B06	Hygromycin B	protein synthesis, aminoglycoside	318102	374904	373037	335766	362009	372124	378793	0.00106521	0.568633	0.343655	0.0446105	0.172011	0.174746	1
PM17	B07	Hygromycin B	protein synthesis, aminoglycoside	318102	374904	373037	335766	362009	372124	378793	0.00106521	0.568633	0.343655	0.0446105	0.172011	0.174746	1
PM17	B08	Hygromycin B	protein synthesis, aminoglycoside	318102	374904	373037	335766	362009	372124	378793	0.00106521	0.568633	0.343655	0.0446105	0.172011	0.174746	1
PM17	B09	Ethionamide	anti-tuberculostic	327288	371383	359423	328309	353380	360676	366666	0.061835	0.807284	0.663053	0.115175	0.381304	0.618709	1
PM17	B10	Ethionamide	anti-tuberculostic	327288	371383	359423	328309	353380	360676	366666	0.061835	0.807284	0.663053	0.115175	0.381304	0.618709	1
PM17	B11	Ethionamide	anti-tuberculostic	327288	371383	359423	328309	353380	360676	366666	0.061835	0.807284	0.663053	0.115175	0.381304	0.618709	1
PM17	B12	Ethionamide	anti-tuberculostic	327288	371383	359423	328309	353380	360676	366666	0.061835	0.807284	0.663053	0.115175	0.381304	0.618709	1
PM17	C01	4-Aminopyridine	channel blocker, K+	314294	356559	351755	327444	343436	348058	360682	0.042526	0.748509	0.393401	0.132721	0.330087	0.261187	1
PM17	C02	4-Aminopyridine	channel blocker, K+	314294	356559	351755	327444	343436	348058	360682	0.042526	0.748509	0.393401	0.132721	0.330087	0.261187	1
PM17	C03	4-Aminopyridine	channel blocker, K+	314294	356559	351755	327444	343436	348058	360682	0.042526	0.748509	0.393401	0.132721	0.330087	0.261187	1
PM17	C04	4-Aminopyridine	channel blocker, K+	314294	356559	351755	327444	343436	348058	360682	0.042526	0.748509	0.393401	0.132721	0.330087	0.261187	1
PM17	C05	Sulfachloropyridazine	folate synthesis, PABA analog	314563	366860	359550	300998	354790	350528	375579	0.000784734	0.414308	0.0410072	0.0310735	0.0640198	0.0220826	1
PM17	C06	Sulfachloropyridazine	folate synthesis, PABA analog	314563	366860	359550	300998	354790	350528	375579	0.000784734	0.414308	0.0410072	0.0310735	0.0640198	0.0220826	1
PM17	C07	Sulfachloropyridazine	folate synthesis, PABA analog	314563	366860	359550	300998	354790	350528	375579	0.000784734	0.414308	0.0410072	0.0310735	0.0640198	0.0220826	1
PM17	C08	Sulfachloropyridazine	folate synthesis, PABA analog	314563	366860	359550	300998	354790	350528	375579	0.000784734	0.414308	0.0410072	0.0310735	0.0640198	0.0220826	1
PM17	C09	Sulfamonomethoxine	folate antagonist	303337	351255	340765	287026	338058	338742	358508	0.0203807	0.686371	0.298759	0.0387205	0.27348	0.220699	1
PM17	C10	Sulfamonomethoxine	folate antagonist	303337	351255	340765	287026	338058	338742	358508	0.0203807	0.686371	0.298759	0.0387205	0.27348	0.220699	1
PM17	C11	Sulfamonomethoxine	folate antagonist	303337	351255	340765	287026	338058	338742	358508	0.0203807	0.686371	0.298759	0.0387205	0.27348	0.220699	1
PM17	C12	Sulfamonomethoxine	folate antagonist	303337	351255	340765	287026	338058	338742	358508	0.0203807	0.686371	0.298759	0.0387205	0.27348	0.220699	1
PM17	D01	Oxycarboxin	respiratory enzymes, carboxamide, fungicide	221012	248466	269519	214318	247876	232972	242800	0.0090483	0.179144	0.0448548	0.000511823	0.5721	0.314808	1
PM17	D02	Oxycarboxin	respiratory enzymes, carboxamide, fungicide	221012	248466	269519	214318	247876	232972	242800	0.0090483	0.179144	0.0448548	0.000511823	0.5721	0.314808	1
PM17	D03	Oxycarboxin	respiratory enzymes, carboxamide, fungicide	221012	248466	269519	214318	247876	232972	242800	0.0090483	0.179144	0.0448548	0.000511823	0.5721	0.314808	1
PM17	D04	Oxycarboxin	respiratory enzymes, carboxamide, fungicide	221012	248466	269519	214318	247876	232972	242800	0.0090483	0.179144	0.0448548	0.000511823	0.5721	0.314808	1
PM17	D05	Aminotriazole	aa analog, histidine, amino acid starvation, Gcn4p (yst), catalase inhibitor (gn)	316893	360352	354146	315808	348620	355108	368869	0.00192456	0.161036	0.0968708	0.012202	0.15627	0.114552	1
PM17	D06	Aminotriazole	aa analog, histidine, amino acid starvation, Gcn4p (yst), catalase inhibitor (gn)	316893	360352	354146	315808	348620	355108	368869	0.00192456	0.161036	0.0968708	0.012202	0.15627	0.114552	1
PM17	D07	Aminotriazole	aa analog, histidine, amino acid starvation, Gcn4p (yst), catalase inhibitor (gn)	316893	360352	354146	315808	348620	355108	368869	0.00192456	0.161036	0.0968708	0.012202	0.15627	0.114552	1
PM17	D08	Aminotriazole	aa analog, histidine, amino acid starvation, Gcn4p (yst), catalase inhibitor (gn)	316893	360352	354146	315808	348620	355108	368869	0.00192456	0.161036	0.0968708	0.012202	0.15627	0.114552	1
PM17	D09	Chlorpromazine	cell cycle modulation, calmodulin dependent cyclic nucleotide phosphodiesterase (m)	192993	227898	226243	202311	213044	221830	229132	0.0539652	0.83559	0.77915	0.018622	0.24744	0.458659	1
PM17	D10	Chlorpromazine	cell cycle modulation, calmodulin dependent cyclic nucleotide phosphodiesterase (m)	192993	227898	226243	202311	213044	221830	229132	0.0539652	0.83559	0.77915	0.018622	0.24744	0.458659	1
PM17	D11	Chlorpromazine	cell cycle modulation, calmodulin dependent cyclic nucleotide phosphodiesterase (m)	192993	227898	226243	202311	213044	221830	229132	0.0539652	0.83559	0.77915	0.018622	0.24744	0.458659	1
PM17	D12	Chlorpromazine	cell cycle modulation, calmodulin dependent cyclic nucleotide phosphodiesterase (m)	192993	227898	226243	202311	213044	221830	229132	0.0539652	0.83559	0.77915	0.018622	0.24744	0.458659	1
PM17	E01	Niaproof	membrane, detergent, anionic	125076	134170	130458	148970	128112	166838	138144	0.115434	0.396842	0.189426	0.7987	0.161607	0.489387	1
PM17	E02	Niaproof	membrane, detergent, anionic	125076	134170	130458	148970	128112	166838	138144	0.115434	0.396842	0.189426	0.7987	0.161607	0.489387	1
PM17	E03	Niaproof	membrane, detergent, anionic	125076	134170	130458	148970	128112	166838	138144	0.115434	0.396842	0.189426	0.7987	0.161607	0.489387	1
PM17	E04	Niaproof	membrane, detergent, anionic	125076	134170	130458	148970	128112	166838	138144	0.115434	0.396842	0.189426	0.7987	0.161607	0.489387	1
PM17	E05	Compound 48/80	cell cycle modulation, Calmodulin inhibitor (gn) phospholipase C, ADP ribosylation	246474	287870	252368	186956	275402	230214	263075	0.715995	0.590745	0.844209	0.191434	0.78857	0.513951	1
PM17	E06	Compound 48/80	cell cycle modulation, Calmodulin inhibitor (gn) phospholipase C, ADP ribosylation	246474	287870	252368	186956	275402	230214	263075	0.715995	0.590745	0.844209	0.191434	0.78857	0.513951	1
PM17	E07	Compound 48/80	cell cycle modulation, Calmodulin inhibitor (gn) phospholipase C, ADP ribosylation	246474	287870	252368	186956	275402	230214	263075	0.715995	0.590745	0.844209	0.191434	0.78857	0.513951	1
PM17	E08	Compound 48/80	cell cycle modulation, Calmodulin inhibitor (gn) phospholipase C, ADP ribosylation	246474	287870	252368	186956	275402	230214	263075	0.715995	0.590745	0.844209	0.191434	0.78857	0.513951	1
PM17	E09	Sodium tungstate	toxic anion, molybdate analog	293548	350819	345305	307668	338505	337276	347164	0.00647468	0.572201	0.699638	0.010434	0.218088	0.136345	1
PM17	E10	Sodium tungstate	toxic anion, molybdate analog	293548	350819	345305	307668	338505	337276	347164	0.00647468	0.572201	0.699638	0.010434	0.218088	0.136345	1
PM17	E11	Sodium tungstate	toxic anion, molybdate analog	293548	350819	345305	307668	338505	337276	347164	0.00647468	0.572201	0.699638	0.010434	0.218088	0.136345	1
PM17	E12	Sodium tungstate	toxic anion, molybdate analog	293548	350819	345305	307668	338505	337276	347164	0.00647468	0.572201	0.699638	0.010434	0.218088	0.136345	1
PM17	F01	Lithium chloride	toxic cation	304806	347966	353713	324278	346514	350316	357545	0.0417331	0.543697	0.771973	0.13278	0.501728	0.59859	1
PM17	F02	Lithium chloride	toxic cation	304806	347966	353713	324278	346514	350316	357545	0.0417331	0.543697	0.771973	0.13278	0.501728	0.59859	1
PM17	F03	Lithium chloride	toxic cation	304806	347966	353713	324278	346514	350316	357545	0.0417331	0.543697	0.771973	0.13278	0.501728	0.59859	1
PM17	F04	Lithium chloride	toxic cation	304806	347966	353713	324278	346514	350316	357545	0.0417331	0.543697	0.771973	0.13278	0.501728	0.59859	1
PM17	F05	D,L-Methionine hydroxamate	tRNA synthetase	272842	333874	323424	263021	330823	336157	349494	0.00170628	0.282657	0.391906	0.0235704	0.116197	0.362292	1
PM17	F06	D,L-Methionine hydroxamate	tRNA synthetase	272842	333874	323424	263021	330823	336157	349494	0.00170628	0.282657	0.391906	0.0235704	0.116197	0.362292	1
PM17	F07	D,L-Methionine hydroxamate	tRNA synthetase	272842	333874	323424	263021	330823	336157	349494	0.00170628	0.282657	0.391906	0.0235704	0.116197	0.362292	1
PM17	F08	D,L-Methionine hydroxamate	tRNA synthetase	272842	333874	323424	263021	330823	336157	349494	0.00170628	0.282657	0.391906	0.0235704	0.116197	0.362292	1
PM17	F09	Tannic acid	antimicrobial, from plants	382527	404822	391644	395741	388446	413796	419281	0.081397	0.317791	0.134543	0.215884	0.0795764	0.709487	1
PM17	F10	Tannic acid	antimicrobial, from plants	382527	404822	391644	395741	388446	413796	419281	0.081397	0.317791	0.134543	0.215884	0.0795764	0.709487	1
PM17	F11	Tannic acid	antimicrobial, from plants	382527	404822	391644	395741	388446	413796	419281	0.081397	0.317791	0.134543	0.215884	0.0795764	0.709487	1
PM17	F12	Tannic acid	antimicrobial, from plants	382527	404822	391644	395741	388446	413796	419281	0.081397	0.317791	0.134543	0.215884	0.0795764	0.709487	1
PM17	G01	Chlorambucil	N/A	308042	348176	341650	309350	335186	343438	352800	0.00980429	0.252672	0.0365138	0.0211482	0.0476318	0.430997	1
PM17	G02	Chlorambucil	N/A	308042	348176	341650	309350	335186	343438	352800	0.00980429	0.252672	0.0365138	0.0211482	0.0476318	0.430997	1
PM17	G03	Chlorambucil	N/A	308042	348176	341650	309350	335186	343438	352800	0.00980429	0.252672	0.0365138	0.0211482	0.0476318	0.430997	1
PM17	G04	Chlorambucil	N/A	308042	348176	341650	309350	335186	343438	352800	0.00980429	0.252672	0.0365138	0.0211482	0.0476318	0.430997	1
PM17	G05	Cefamandole	wall, cephalosporin second generation	216236	231756	279920	302800	278442	316497	332002	0.132165	0.178086	0.426244	0.685255	0.370431	0.852186	1
PM17	G06	Cefamandole	wall, cephalosporin second generation	216236	231756	279920	302800	278442	316497	332002	0.132165	0.178086	0.426244	0.685255	0.370431	0.852186	1
PM17	G07	Cefamandole	wall, cephalosporin second generation	216236	231756	279920	302800	278442	316497	332002	0.132165	0.178086	0.426244	0.685255	0.370431	0.852186	1
PM17	G08	Cefamandole	wall, cephalosporin second generation	216236	231756	279920	302800	278442	316497	332002	0.132165	0.178086	0.426244	0.685255	0.370431	0.852186	1
PM17	G09	Cefoperazone	wall, cephalosporin third generation	177612	203185	241449	210128	214249	251828	247006	0.139365	0.307755	0.862732	0.452496	0.366616	0.934559	1
PM17	G10	Cefoperazone	wall, cephalosporin third generation	177612	203185	241449	210128	214249	251828	247006	0.139365	0.307755	0.862732	0.452496	0.366616	0.934559	1
PM17	G11	Cefoperazone	wall, cephalosporin third generation	177612	203185	241449	210128	214249	251828	247006	0.139365	0.307755	0.862732	0.452496	0.366616	0.934559	1
PM17	G12	Cefoperazone	wall, cephalosporin third generation	177612	203185	241449	210128	214249	251828	247006	0.139365	0.307755	0.862732	0.452496	0.366616	0.934559	1
PM17	H01	Cefsulodin	wall, cephalosporin	331947	329950	288113	338384	280108	363634	375315	0.0344864	0.440973	0.0313262	0.115033	0.0116761	0.487492	1
PM17	H02	Cefsulodin	wall, cephalosporin	331947	329950	288113	338384	280108	363634	375315	0.0344864	0.440973	0.0313262	0.115033	0.0116761	0.487492	1
PM17	H03	Cefsulodin	wall, cephalosporin	331947	329950	288113	338384	280108	363634	375315	0.0344864	0.440973	0.0313262	0.115033	0.0116761	0.487492	1
PM17	H04	Cefsulodin	wall, cephalosporin	331947	329950	288113	338384	280108	363634	375315	0.0344864	0.440973	0.0313262	0.115033	0.0116761	0.487492	1
PM17	H05	Caffeine	cyclic AMP phosphodiesterase	328416	368287	353794	284720	355228	356688	364280	0.118513	0.75684	0.487947	0.0287356	0.563842	0.42553	1
PM17	H06	Caffeine	cyclic AMP phosphodiesterase	328416	368287	353794	284720	355228	356688	364280	0.118513	0.75684	0.487947	0.0287356	0.563842	0.42553	1
PM17	H07	Caffeine	cyclic AMP phosphodiesterase	328416	368287	353794	284720	355228	356688	364280	0.118513	0.75684	0.487947	0.0287356	0.563842	0.42553	1
PM17	H08	Caffeine	cyclic AMP phosphodiesterase	328416	368287	353794	284720	355228	356688	364280	0.118513	0.75684	0.487947	0.0287356	0.563842	0.42553	1
PM17	H09	Phenylarsine oxide	tyrosine phosphatase inhibitor	207400	188482	188393	204266	188242	252607	243818	0.127553	0.365951	0.373155	0.689009	0.134239	0.886535	1
PM17	H10	Phenylarsine oxide	tyrosine phosphatase inhibitor	207400	188482	188393	204266	188242	252607	243818	0.127553	0.365951	0.373155	0.689009	0.134239	0.886535	1
PM17	H11	Phenylarsine oxide	tyrosine phosphatase inhibitor	207400	188482	188393	204266	188242	252607	243818	0.127553	0.365951	0.373155	0.689009	0.134239	0.886535	1
PM17	H12	Phenylarsine oxide	tyrosine phosphatase inhibitor	207400	188482	188393	204266	188242	252607	243818	0.127553	0.365951	0.373155	0.689009	0.134239	0.886535	1
PM18	A01	Ketoprofen	anti-capsule	197202	227001	228354	187822	196020	214406	205154	0.509182	0.05332	0.0640272	0.0887289	0.470186	0.569553	1
PM18	A02	Ketoprofen	anti-capsule	197202	227001	228354	187822	196020	214406	205154	0.509182	0.05332	0.0640272	0.0887289	0.470186	0.569553	1
PM18	A03	Ketoprofen	anti-capsule	197202	227001	228354	187822	196020	214406	205154	0.509182	0.05332	0.0640272	0.0887289	0.470186	0.569553	1
PM18	A04	Ketoprofen	anti-capsule	197202	227001	228354	187822	196020	214406	205154	0.509182	0.05332	0.0640272	0.0887289	0.470186	0.569553	1
PM18	A05	Sodium pyrophosphate decahydrate	chelating agent	337967	391778	390226	357100	388348	379714	387628	0.0255167	0.631055	0.762976	0.060383	0.967215	0.39966	1
PM18	A06	Sodium pyrophosphate decahydrate	chelating agent	337967	391778	390226	357100	388348	379714	387628	0.0255167	0.631055	0.762976	0.060383	0.967215	0.39966	1
PM18	A07	Sodium pyrophosphate decahydrate	chelating agent	337967	391778	390226	357100	388348	379714	387628	0.0255167	0.631055	0.762976	0.060383	0.967215	0.39966	1
PM18	A08	Sodium pyrophosphate decahydrate	chelating agent	337967	391778	390226	357100	388348	379714	387628	0.0255167	0.631055	0.762976	0.060383	0.967215	0.39966	1
PM18	A09	Thiamphenicol	protein synthesis	275316	373324	346100	295318	375781	322027	360690	0.00975147	0.126915	0.679998	0.0435802	0.19384	0.142514	1
PM18	A10	Thiamphenicol	protein synthesis	275316	373324	346100	295318	375781	322027	360690	0.00975147	0.126915	0.679998	0.0435802	0.19384	0.142514	1
PM18	A11	Thiamphenicol	protein synthesis	275316	373324	346100	295318	375781	322027	360690	0.00975147	0.126915	0.679998	0.0435802	0.19384	0.142514	1
PM18	A12	Thiamphenicol	protein synthesis	275316	373324	346100	295318	375781	322027	360690	0.00975147	0.126915	0.679998	0.0435802	0.19384	0.142514	1
PM18	B01	Trifluorothymidine	thymidylate synthetase, DNA polymerase	309571	368478	358924	333150	344126	354200	373228	0.00363786	0.471351	0.182681	0.0463542	0.282585	0.0482334	1
PM18	B02	Trifluorothymidine	thymidylate synthetase, DNA polymerase	309571	368478	358924	333150	344126	354200	373228	0.00363786	0.471351	0.182681	0.0463542	0.282585	0.0482334	1
PM18	B03	Trifluorothymidine	thymidylate synthetase, DNA polymerase	309571	368478	358924	333150	344126	354200	373228	0.00363786	0.471351	0.182681	0.0463542	0.282585	0.0482334	1
PM18	B04	Trifluorothymidine	thymidylate synthetase, DNA polymerase	309571	368478	358924	333150	344126	354200	373228	0.00363786	0.471351	0.182681	0.0463542	0.282585	0.0482334	1
PM18	B05	Pipemidic Acid	DNA unwinding, gyrase (GN), topoisomerase (GP), quinolone	320131	388948	382818	348768	377037	378910	391288	0.011471	0.751207	0.351327	0.062926	0.336084	0.162252	1
PM18	B06	Pipemidic Acid	DNA unwinding, gyrase (GN), topoisomerase (GP), quinolone	320131	388948	382818	348768	377037	378910	391288	0.011471	0.751207	0.351327	0.062926	0.336084	0.162252	1
PM18	B07	Pipemidic Acid	DNA unwinding, gyrase (GN), topoisomerase (GP), quinolone	320131	388948	382818	348768	377037	378910	391288	0.011471	0.751207	0.351327	0.062926	0.336084	0.162252	1
PM18	B08	Pipemidic Acid	DNA unwinding, gyrase (GN), topoisomerase (GP), quinolone	320131	388948	382818	348768	377037	378910	391288	0.011471	0.751207	0.351327	0.062926	0.336084	0.162252	1
PM18	B09	Azathioprine	nucleic acid analog, purine	339546	379978	375466	345071	367846	370267	375516	0.0996107	0.750943	0.99732	0.249024	0.693915	0.717867	1
PM18	B10	Azathioprine	nucleic acid analog, purine	339546	379978	375466	345071	367846	370267	375516	0.0996107	0.750943	0.99732	0.249024	0.693915	0.717867	1
PM18	B11	Azathioprine	nucleic acid analog, purine	339546	379978	375466	345071	367846	370267	375516	0.0996107	0.750943	0.99732	0.249024	0.693915	0.717867	1
PM18	B12	Azathioprine	nucleic acid analog, purine	339546	379978	375466	345071	367846	370267	375516	0.0996107	0.750943	0.99732	0.249024	0.693915	0.717867	1
PM18	C01	Poly-L-lysine	membrane, detergent, cationic	294232	358560	352120	275141	345772	311797	212058	0.0564306	0.00338416	0.00144711	0.201566	0.00649332	0.0983569	1
PM18	C02	Poly-L-lysine	membrane, detergent, cationic	294232	358560	352120	275141	345772	311797	212058	0.0564306	0.00338416	0.00144711	0.201566	0.00649332	0.0983569	1
PM18	C03	Poly-L-lysine	membrane, detergent, cationic	294232	358560	352120	275141	345772	311797	212058	0.0564306	0.00338416	0.00144711	0.201566	0.00649332	0.0983569	1
PM18	C04	Poly-L-lysine	membrane, detergent, cationic	294232	358560	352120	275141	345772	311797	212058	0.0564306	0.00338416	0.00144711	0.201566	0.00649332	0.0983569	1
PM18	C05	Sulfisoxazole	folate synthesis, PABA analog	312788	357567	349507	228684	350973	339080	358913	0.0101958	0.874712	0.184764	0.0297605	0.521851	0.0502176	1
PM18	C06	Sulfisoxazole	folate synthesis, PABA analog	312788	357567	349507	228684	350973	339080	358913	0.0101958	0.874712	0.184764	0.0297605	0.521851	0.0502176	1
PM18	C07	Sulfisoxazole	folate synthesis, PABA analog	312788	357567	349507	228684	350973	339080	358913	0.0101958	0.874712	0.184764	0.0297605	0.521851	0.0502176	1
PM18	C08	Sulfisoxazole	folate synthesis, PABA analog	312788	357567	349507	228684	350973	339080	358913	0.0101958	0.874712	0.184764	0.0297605	0.521851	0.0502176	1
PM18	C09	Pentachlorophenol (PCP)	respiration, ionophore, H+	264848	254162	265504	259022	264288	295818	299665	0.119931	0.0877454	0.0985856	0.303922	0.155429	0.776835	1
PM18	C10	Pentachlorophenol (PCP)	respiration, ionophore, H+	264848	254162	265504	259022	264288	295818	299665	0.119931	0.0877454	0.0985856	0.303922	0.155429	0.776835	1
PM18	C11	Pentachlorophenol (PCP)	respiration, ionophore, H+	264848	254162	265504	259022	264288	295818	299665	0.119931	0.0877454	0.0985856	0.303922	0.155429	0.776835	1
PM18	C12	Pentachlorophenol (PCP)	respiration, ionophore, H+	264848	254162	265504	259022	264288	295818	299665	0.119931	0.0877454	0.0985856	0.303922	0.155429	0.776835	1
PM18	D01	Sodium m-arsenite	toxic anion	250416	294750	278089	256760	283134	278234	298222	0.015319	0.592694	0.0746811	0.013426	0.262991	0.0490076	1
PM18	D02	Sodium m-arsenite	toxic anion	250416	294750	278089	256760	283134	278234	298222	0.015319	0.592694	0.0746811	0.013426	0.262991	0.0490076	1
PM18	D03	Sodium m-arsenite	toxic anion	250416	294750	278089	256760	283134	278234	298222	0.015319	0.592694	0.0746811	0.013426	0.262991	0.0490076	1
PM18	D04	Sodium m-arsenite	toxic anion	250416	294750	278089	256760	283134	278234	298222	0.015319	0.592694	0.0746811	0.013426	0.262991	0.0490076	1
PM18	D05	Sodium bromate	toxic anion	259222	309874	302614	237684	286646	291798	306077	0.0120023	0.651825	0.619436	0.0127424	0.126253	0.110266	1
PM18	D06	Sodium bromate	toxic anion	259222	309874	302614	237684	286646	291798	306077	0.0120023	0.651825	0.619436	0.0127424	0.126253	0.110266	1
PM18	D07	Sodium bromate	toxic anion	259222	309874	302614	237684	286646	291798	306077	0.0120023	0.651825	0.619436	0.0127424	0.126253	0.110266	1
PM18	D08	Sodium bromate	toxic anion	259222	309874	302614	237684	286646	291798	306077	0.0120023	0.651825	0.619436	0.0127424	0.126253	0.110266	1
PM18	D09	Lidocaine	ion channal inhibitor, Na+	251834	322321	330394	280978	321325	300490	284626	0.171337	0.00396955	0.0541206	0.870009	0.106503	0.0899633	1
PM18	D10	Lidocaine	ion channal inhibitor, Na+	251834	322321	330394	280978	321325	300490	284626	0.171337	0.00396955	0.0541206	0.870009	0.106503	0.0899633	1
PM18	D11	Lidocaine	ion channal inhibitor, Na+	251834	322321	330394	280978	321325	300490	284626	0.171337	0.00396955	0.0541206	0.870009	0.106503	0.0899633	1
PM18	D12	Lidocaine	ion channal inhibitor, Na+	251834	322321	330394	280978	321325	300490	284626	0.171337	0.00396955	0.0541206	0.870009	0.106503	0.0899633	1
PM18	E01	Sodium metasilicate	toxic anion	316588	378574	376358	351894	375424	364022	377553	0.00909905	0.853714	0.791834	0.0190821	0.751522	0.350698	1
PM18	E02	Sodium metasilicate	toxic anion	316588	378574	376358	351894	375424	364022	377553	0.00909905	0.853714	0.791834	0.0190821	0.751522	0.350698	1
PM18	E03	Sodium metasilicate	toxic anion	316588	378574	376358	351894	375424	364022	377553	0.00909905	0.853714	0.791834	0.0190821	0.751522	0.350698	1
PM18	E04	Sodium metasilicate	toxic anion	316588	378574	376358	351894	375424	364022	377553	0.00909905	0.853714	0.791834	0.0190821	0.751522	0.350698	1
PM18	E05	Sodium periodate	toxic anion, oxidizing agent	172638	219818	224764	154829	211162	226017	249100	0.0763971	0.151856	0.194202	0.0195791	0.110584	0.293171	1
PM18	E06	Sodium periodate	toxic anion, oxidizing agent	172638	219818	224764	154829	211162	226017	249100	0.0763971	0.151856	0.194202	0.0195791	0.110584	0.293171	1
PM18	E07	Sodium periodate	toxic anion, oxidizing agent	172638	219818	224764	154829	211162	226017	249100	0.0763971	0.151856	0.194202	0.0195791	0.110584	0.293171	1
PM18	E08	Sodium periodate	toxic anion, oxidizing agent	172638	219818	224764	154829	211162	226017	249100	0.0763971	0.151856	0.194202	0.0195791	0.110584	0.293171	1
PM18	E09	Antimony (III) chloride	toxic cation	284284	344742	341401	296292	334216	324481	322943	0.0849166	0.0470768	0.00861032	0.134806	0.236029	0.748139	1
PM18	E10	Antimony (III) chloride	toxic cation	284284	344742	341401	296292	334216	324481	322943	0.0849166	0.0470768	0.00861032	0.134806	0.236029	0.748139	1
PM18	E11	Antimony (III) chloride	toxic cation	284284	344742	341401	296292	334216	324481	322943	0.0849166	0.0470768	0.00861032	0.134806	0.236029	0.748139	1
PM18	E12	Antimony (III) chloride	toxic cation	284284	344742	341401	296292	334216	324481	322943	0.0849166	0.0470768	0.00861032	0.134806	0.236029	0.748139	1
PM18	F01	Semicarbazide hydrochloride	carbonyl agent, semicarbazide-sensitive amine oxidase, DNA damage	286601	328170	322272	275770	322898	325233	345608	0.00424534	0.00577398	0.0484249	0.00205741	0.0115087	0.125922	1
PM18	F02	Semicarbazide hydrochloride	carbonyl agent, semicarbazide-sensitive amine oxidase, DNA damage	286601	328170	322272	275770	322898	325233	345608	0.00424534	0.00577398	0.0484249	0.00205741	0.0115087	0.125922	1
PM18	F03	Semicarbazide hydrochloride	carbonyl agent, semicarbazide-sensitive amine oxidase, DNA damage	286601	328170	322272	275770	322898	325233	345608	0.00424534	0.00577398	0.0484249	0.00205741	0.0115087	0.125922	1
PM18	F04	Semicarbazide hydrochloride	carbonyl agent, semicarbazide-sensitive amine oxidase, DNA damage	286601	328170	322272	275770	322898	325233	345608	0.00424534	0.00577398	0.0484249	0.00205741	0.0115087	0.125922	1
PM18	F05	Tinidazole	Mutagen, nitroimidazole (GP, GN)	117347	169343	135332	65516	125731	116205	149592	0.121005	0.0104833	0.712286	0.0171316	0.334113	0.239711	1
PM18	F06	Tinidazole	Mutagen, nitroimidazole (GP, GN)	117347	169343	135332	65516	125731	116205	149592	0.121005	0.0104833	0.712286	0.0171316	0.334113	0.239711	1
PM18	F07	Tinidazole	Mutagen, nitroimidazole (GP, GN)	117347	169343	135332	65516	125731	116205	149592	0.121005	0.0104833	0.712286	0.0171316	0.334113	0.239711	1
PM18	F08	Tinidazole	Mutagen, nitroimidazole (GP, GN)	117347	169343	135332	65516	125731	116205	149592	0.121005	0.0104833	0.712286	0.0171316	0.334113	0.239711	1
PM18	F09	Aztreonam	wall, lactam	310368	353326	363096	331272	337328	365567	375264	0.0179274	0.0440393	0.0996837	0.0470126	0.0207535	0.170466	1
PM18	F10	Aztreonam	wall, lactam	310368	353326	363096	331272	337328	365567	375264	0.0179274	0.0440393	0.0996837	0.0470126	0.0207535	0.170466	1
PM18	F11	Aztreonam	wall, lactam	310368	353326	363096	331272	337328	365567	375264	0.0179274	0.0440393	0.0996837	0.0470126	0.0207535	0.170466	1
PM18	F12	Aztreonam	wall, lactam	310368	353326	363096	331272	337328	365567	375264	0.0179274	0.0440393	0.0996837	0.0470126	0.0207535	0.170466	1
PM18	G01	Triclosan	bacterial fatty acid synthesis, enoyl-acyl carrier protein reductase	324114	378206	372394	344219	361228	362561	382969	0.00921138	0.510174	0.115578	0.0106905	0.0557678	0.309081	1
PM18	G02	Triclosan	bacterial fatty acid synthesis, enoyl-acyl carrier protein reductase	324114	378206	372394	344219	361228	362561	382969	0.00921138	0.510174	0.115578	0.0106905	0.0557678	0.309081	1
PM18	G03	Triclosan	bacterial fatty acid synthesis, enoyl-acyl carrier protein reductase	324114	378206	372394	344219	361228	362561	382969	0.00921138	0.510174	0.115578	0.0106905	0.0557678	0.309081	1
PM18	G04	Triclosan	bacterial fatty acid synthesis, enoyl-acyl carrier protein reductase	324114	378206	372394	344219	361228	362561	382969	0.00921138	0.510174	0.115578	0.0106905	0.0557678	0.309081	1
PM18	G05	3,5- Diamino-1,2,4-triazole (Guanazole)	ribonucleotide DP reductase	325038	386676	385346	353094	371811	384330	399354	0.00281525	0.0141414	0.162366	0.00110463	0.188724	0.127788	1
PM18	G06	3,5- Diamino-1,2,4-triazole (Guanazole)	ribonucleotide DP reductase	325038	386676	385346	353094	371811	384330	399354	0.00281525	0.0141414	0.162366	0.00110463	0.188724	0.127788	1
PM18	G07	3,5- Diamino-1,2,4-triazole (Guanazole)	ribonucleotide DP reductase	325038	386676	385346	353094	371811	384330	399354	0.00281525	0.0141414	0.162366	0.00110463	0.188724	0.127788	1
PM18	G08	3,5- Diamino-1,2,4-triazole (Guanazole)	ribonucleotide DP reductase	325038	386676	385346	353094	371811	384330	399354	0.00281525	0.0141414	0.162366	0.00110463	0.188724	0.127788	1
PM18	G09	Myricetin	DNA & RNA synthesis, polymerase inhibitor (e. coli)	326326	367356	387202	348461	359914	388831	399198	0.00614879	0.0288322	0.0446962	0.0181763	0.0250677	0.085618	1
PM18	G10	Myricetin	DNA & RNA synthesis, polymerase inhibitor (e. coli)	326326	367356	387202	348461	359914	388831	399198	0.00614879	0.0288322	0.0446962	0.0181763	0.0250677	0.085618	1
PM18	G11	Myricetin	DNA & RNA synthesis, polymerase inhibitor (e. coli)	326326	367356	387202	348461	359914	388831	399198	0.00614879	0.0288322	0.0446962	0.0181763	0.0250677	0.085618	1
PM18	G12	Myricetin	DNA & RNA synthesis, polymerase inhibitor (e. coli)	326326	367356	387202	348461	359914	388831	399198	0.00614879	0.0288322	0.0446962	0.0181763	0.0250677	0.085618	1
PM18	H01	5-Fluoro-5'-deoxyuridine	pyrimidine antimetabolite: inhibits nucleic acid replication	334816	367639	363688	354129	370908	348652	384163	0.00733383	0.0352021	0.0164329	0.00732098	0.305893	0.234376	1
PM18	H02	5-Fluoro-5'-deoxyuridine	pyrimidine antimetabolite: inhibits nucleic acid replication	334816	367639	363688	354129	370908	348652	384163	0.00733383	0.0352021	0.0164329	0.00732098	0.305893	0.234376	1
PM18	H03	5-Fluoro-5'-deoxyuridine	pyrimidine antimetabolite: inhibits nucleic acid replication	334816	367639	363688	354129	370908	348652	384163	0.00733383	0.0352021	0.0164329	0.00732098	0.305893	0.234376	1
PM18	H04	5-Fluoro-5'-deoxyuridine	pyrimidine antimetabolite: inhibits nucleic acid replication	334816	367639	363688	354129	370908	348652	384163	0.00733383	0.0352021	0.0164329	0.00732098	0.305893	0.234376	1
PM18	H05	2- Phenylphenol	DNA intercalator	315314	362003	354837	339474	352390	361114	388052	0.0051424	0.272383	0.0144106	0.032015	0.179289	0.191035	1
PM18	H06	2- Phenylphenol	DNA intercalator	315314	362003	354837	339474	352390	361114	388052	0.0051424	0.272383	0.0144106	0.032015	0.179289	0.191035	1
PM18	H07	2- Phenylphenol	DNA intercalator	315314	362003	354837	339474	352390	361114	388052	0.0051424	0.272383	0.0144106	0.032015	0.179289	0.191035	1
PM18	H08	2- Phenylphenol	DNA intercalator	315314	362003	354837	339474	352390	361114	388052	0.0051424	0.272383	0.0144106	0.032015	0.179289	0.191035	1
PM18	H09	Plumbagin	oxidizing agent	304274	296181	309898	289814	292014	342730	381638	0.0821082	0.0144107	0.00712441	0.200299	0.0504992	0.448899	1
PM18	H10	Plumbagin	oxidizing agent	304274	296181	309898	289814	292014	342730	381638	0.0821082	0.0144107	0.00712441	0.200299	0.0504992	0.448899	1
PM18	H11	Plumbagin	oxidizing agent	304274	296181	309898	289814	292014	342730	381638	0.0821082	0.0144107	0.00712441	0.200299	0.0504992	0.448899	1
PM18	H12	Plumbagin	oxidizing agent	304274	296181	309898	289814	292014	342730	381638	0.0821082	0.0144107	0.00712441	0.200299	0.0504992	0.448899	1
PM19	A01	Josamycin	protein synthesis, 50S ribosomal subunit, macrolide	73383.5	80443.5	73049.5	72664.5	77715.5	82182	83053	0.471629	0.804796	0.508082	0.40818	0.635969	0.952904	1
PM19	A02	Josamycin	protein synthesis, 50S ribosomal subunit, macrolide	73383.5	80443.5	73049.5	72664.5	77715.5	82182	83053	0.471629	0.804796	0.508082	0.40818	0.635969	0.952904	1
PM19	A03	Josamycin	protein synthesis, 50S ribosomal subunit, macrolide	73383.5	80443.5	73049.5	72664.5	77715.5	82182	83053	0.471629	0.804796	0.508082	0.40818	0.635969	0.952904	1
PM19	A04	Josamycin	protein synthesis, 50S ribosomal subunit, macrolide	73383.5	80443.5	73049.5	72664.5	77715.5	82182	83053	0.471629	0.804796	0.508082	0.40818	0.635969	0.952904	1
PM19	A05	Gallic acid	respiration, ionophore, H+	356806	423174	414726	334088	395858	399926	406112	0.154382	0.0576761	0.146606	0.00679838	0.13712	0.236983	1
PM19	A06	Gallic acid	respiration, ionophore, H+	356806	423174	414726	334088	395858	399926	406112	0.154382	0.0576761	0.146606	0.00679838	0.13712	0.236983	1
PM19	A07	Gallic acid	respiration, ionophore, H+	356806	423174	414726	334088	395858	399926	406112	0.154382	0.0576761	0.146606	0.00679838	0.13712	0.236983	1
PM19	A08	Gallic acid	respiration, ionophore, H+	356806	423174	414726	334088	395858	399926	406112	0.154382	0.0576761	0.146606	0.00679838	0.13712	0.236983	1
PM19	A09	Coumarin	DNA intercalator	331406	357570	313272	312344	301640	370446	379118	0.00468057	0.36369	0.000180989	0.00254751	0.0162956	0.135214	1
PM19	A10	Coumarin	DNA intercalator	331406	357570	313272	312344	301640	370446	379118	0.00468057	0.36369	0.000180989	0.00254751	0.0162956	0.135214	1
PM19	A11	Coumarin	DNA intercalator	331406	357570	313272	312344	301640	370446	379118	0.00468057	0.36369	0.000180989	0.00254751	0.0162956	0.135214	1
PM19	A12	Coumarin	DNA intercalator	331406	357570	313272	312344	301640	370446	379118	0.00468057	0.36369	0.000180989	0.00254751	0.0162956	0.135214	1
PM19	B01	Methyltrioctylammonium chloride	membrane, detergent, cationic	303090	312171	271091	250982	265365	321444	351115	0.0348389	0.455765	0.00476801	0.00393397	0.0181381	0.198922	1
PM19	B02	Methyltrioctylammonium chloride	membrane, detergent, cationic	303090	312171	271091	250982	265365	321444	351115	0.0348389	0.455765	0.00476801	0.00393397	0.0181381	0.198922	1
PM19	B03	Methyltrioctylammonium chloride	membrane, detergent, cationic	303090	312171	271091	250982	265365	321444	351115	0.0348389	0.455765	0.00476801	0.00393397	0.0181381	0.198922	1
PM19	B04	Methyltrioctylammonium chloride	membrane, detergent, cationic	303090	312171	271091	250982	265365	321444	351115	0.0348389	0.455765	0.00476801	0.00393397	0.0181381	0.198922	1
PM19	B05	Harmane	imidazoline binding sites, agonist	320191	356428	327482	325192	325820	354382	365970	0.0200082	0.613531	0.00215499	0.00432613	0.0222149	0.0240581	1
PM19	B06	Harmane	imidazoline binding sites, agonist	320191	356428	327482	325192	325820	354382	365970	0.0200082	0.613531	0.00215499	0.00432613	0.0222149	0.0240581	1
PM19	B07	Harmane	imidazoline binding sites, agonist	320191	356428	327482	325192	325820	354382	365970	0.0200082	0.613531	0.00215499	0.00432613	0.0222149	0.0240581	1
PM19	B08	Harmane	imidazoline binding sites, agonist	320191	356428	327482	325192	325820	354382	365970	0.0200082	0.613531	0.00215499	0.00432613	0.0222149	0.0240581	1
PM19	B09	2,4-Dinitrophenol	respiration, ionophore, H+	310973	351812	329443	317702	321780	343780	365636	0.0105115	0.419195	0.012956	0.0159716	0.0533695	0.0972057	1
PM19	B10	2,4-Dinitrophenol	respiration, ionophore, H+	310973	351812	329443	317702	321780	343780	365636	0.0105115	0.419195	0.012956	0.0159716	0.0533695	0.0972057	1
PM19	B11	2,4-Dinitrophenol	respiration, ionophore, H+	310973	351812	329443	317702	321780	343780	365636	0.0105115	0.419195	0.012956	0.0159716	0.0533695	0.0972057	1
PM19	B12	2,4-Dinitrophenol	respiration, ionophore, H+	310973	351812	329443	317702	321780	343780	365636	0.0105115	0.419195	0.012956	0.0159716	0.0533695	0.0972057	1
PM19	C01	Chlorhexidine	membrane, electron transport	322295	287293	199369	327300	197874	347974	370886	0.0455116	0.449055	0.00193995	0.041155	0.00328399	0.326483	1
PM19	C02	Chlorhexidine	membrane, electron transport	322295	287293	199369	327300	197874	347974	370886	0.0455116	0.449055	0.00193995	0.041155	0.00328399	0.326483	1
PM19	C03	Chlorhexidine	membrane, electron transport	322295	287293	199369	327300	197874	347974	370886	0.0455116	0.449055	0.00193995	0.041155	0.00328399	0.326483	1
PM19	C04	Chlorhexidine	membrane, electron transport	322295	287293	199369	327300	197874	347974	370886	0.0455116	0.449055	0.00193995	0.041155	0.00328399	0.326483	1
PM19	C05	Umbelliferone	DNA intercalator	346827	383560	359274	356401	353192	385192	389982	0.0334879	0.724435	0.0252477	0.0105227	0.0402267	0.319332	1
PM19	C06	Umbelliferone	DNA intercalator	346827	383560	359274	356401	353192	385192	389982	0.0334879	0.724435	0.0252477	0.0105227	0.0402267	0.319332	1
PM19	C07	Umbelliferone	DNA intercalator	346827	383560	359274	356401	353192	385192	389982	0.0334879	0.724435	0.0252477	0.0105227	0.0402267	0.319332	1
PM19	C08	Umbelliferone	DNA intercalator	346827	383560	359274	356401	353192	385192	389982	0.0334879	0.724435	0.0252477	0.0105227	0.0402267	0.319332	1
PM19	C09	Cinnamic acid	respiration, ionophore, H+	288480	322029	298810	277644	286932	328683	324491	0.0982662	0.929384	0.193681	0.0768643	0.158332	0.774256	1
PM19	C10	Cinnamic acid	respiration, ionophore, H+	288480	322029	298810	277644	286932	328683	324491	0.0982662	0.929384	0.193681	0.0768643	0.158332	0.774256	1
PM19	C11	Cinnamic acid	respiration, ionophore, H+	288480	322029	298810	277644	286932	328683	324491	0.0982662	0.929384	0.193681	0.0768643	0.158332	0.774256	1
PM19	C12	Cinnamic acid	respiration, ionophore, H+	288480	322029	298810	277644	286932	328683	324491	0.0982662	0.929384	0.193681	0.0768643	0.158332	0.774256	1
PM19	D01	Disulfiram	nucleic acid inhibitor, purine	316782	364734	352243	326874	346146	359674	366752	0.0195596	0.872766	0.159805	0.035559	0.248574	0.378602	1
PM19	D02	Disulfiram	nucleic acid inhibitor, purine	316782	364734	352243	326874	346146	359674	366752	0.0195596	0.872766	0.159805	0.035559	0.248574	0.378602	1
PM19	D03	Disulfiram	nucleic acid inhibitor, purine	316782	364734	352243	326874	346146	359674	366752	0.0195596	0.872766	0.159805	0.035559	0.248574	0.378602	1
PM19	D04	Disulfiram	nucleic acid inhibitor, purine	316782	364734	352243	326874	346146	359674	366752	0.0195596	0.872766	0.159805	0.035559	0.248574	0.378602	1
PM19	D05	Iodonitro tetrazolium violet	respiration	382082	342208	270494	398210	286309	390770	404680	0.108022	0.452176	0.00201891	0.052998	0.00221909	0.0226167	1
PM19	D06	Iodonitro tetrazolium violet	respiration	382082	342208	270494	398210	286309	390770	404680	0.108022	0.452176	0.00201891	0.052998	0.00221909	0.0226167	1
PM19	D07	Iodonitro tetrazolium violet	respiration	382082	342208	270494	398210	286309	390770	404680	0.108022	0.452176	0.00201891	0.052998	0.00221909	0.0226167	1
PM19	D08	Iodonitro tetrazolium violet	respiration	382082	342208	270494	398210	286309	390770	404680	0.108022	0.452176	0.00201891	0.052998	0.00221909	0.0226167	1
PM19	D09	Phenyl-methylsulfonyl-fluoride (PMSF)	protease inhibitor, serine	286280	344586	360768	321260	346278	361471	351452	0.00773646	0.751716	0.237166	0.14124	0.546292	0.302813	1
PM19	D10	Phenyl-methylsulfonyl-fluoride (PMSF)	protease inhibitor, serine	286280	344586	360768	321260	346278	361471	351452	0.00773646	0.751716	0.237166	0.14124	0.546292	0.302813	1
PM19	D11	Phenyl-methylsulfonyl-fluoride (PMSF)	protease inhibitor, serine	286280	344586	360768	321260	346278	361471	351452	0.00773646	0.751716	0.237166	0.14124	0.546292	0.302813	1
PM19	D12	Phenyl-methylsulfonyl-fluoride (PMSF)	protease inhibitor, serine	286280	344586	360768	321260	346278	361471	351452	0.00773646	0.751716	0.237166	0.14124	0.546292	0.302813	1
PM19	E01	FCCP	respiration, ionophore, H+	98692	109113	72694.5	131384	71330	130140	138720	0.163828	0.503598	0.0141145	0.640582	0.0144819	0.790641	1
PM19	E02	FCCP	respiration, ionophore, H+	98692	109113	72694.5	131384	71330	130140	138720	0.163828	0.503598	0.0141145	0.640582	0.0144819	0.790641	1
PM19	E03	FCCP	respiration, ionophore, H+	98692	109113	72694.5	131384	71330	130140	138720	0.163828	0.503598	0.0141145	0.640582	0.0144819	0.790641	1
PM19	E04	FCCP	respiration, ionophore, H+	98692	109113	72694.5	131384	71330	130140	138720	0.163828	0.503598	0.0141145	0.640582	0.0144819	0.790641	1
PM19	E05	D,L-Thioctic acid	oxidizing agent	273892	332556	330241	267762	304392	327615	324336	0.0711329	0.618749	0.761419	0.0549616	0.28606	0.838521	1
PM19	E06	D,L-Thioctic acid	oxidizing agent	273892	332556	330241	267762	304392	327615	324336	0.0711329	0.618749	0.761419	0.0549616	0.28606	0.838521	1
PM19	E07	D,L-Thioctic acid	oxidizing agent	273892	332556	330241	267762	304392	327615	324336	0.0711329	0.618749	0.761419	0.0549616	0.28606	0.838521	1
PM19	E08	D,L-Thioctic acid	oxidizing agent	273892	332556	330241	267762	304392	327615	324336	0.0711329	0.618749	0.761419	0.0549616	0.28606	0.838521	1
PM19	E09	Lawsone	oxidizing agent	303726	304433	300070	280080	306817	295635	305984	0.567182	0.689646	0.345915	0.00177693	0.902205	0.02726	1
PM19	E10	Lawsone	oxidizing agent	303726	304433	300070	280080	306817	295635	305984	0.567182	0.689646	0.345915	0.00177693	0.902205	0.02726	1
PM19	E11	Lawsone	oxidizing agent	303726	304433	300070	280080	306817	295635	305984	0.567182	0.689646	0.345915	0.00177693	0.902205	0.02726	1
PM19	E12	Lawsone	oxidizing agent	303726	304433	300070	280080	306817	295635	305984	0.567182	0.689646	0.345915	0.00177693	0.902205	0.02726	1
PM19	F01	Phenethicillin	wall, lactam	56691	59016.5	54348	53279	54400	60907	61332	0.347902	0.598138	0.0256414	0.0878093	0.182204	0.842858	1
PM19	F02	Phenethicillin	wall, lactam	56691	59016.5	54348	53279	54400	60907	61332	0.347902	0.598138	0.0256414	0.0878093	0.182204	0.842858	1
PM19	F03	Phenethicillin	wall, lactam	56691	59016.5	54348	53279	54400	60907	61332	0.347902	0.598138	0.0256414	0.0878093	0.182204	0.842858	1
PM19	F04	Phenethicillin	wall, lactam	56691	59016.5	54348	53279	54400	60907	61332	0.347902	0.598138	0.0256414	0.0878093	0.182204	0.842858	1
PM19	F05	Blasticidin S	protein synthesis	338082	382398	386116	362708	375294	397440	396106	0.00346338	0.144061	0.160793	0.0163717	0.119545	0.779851	1
PM19	F06	Blasticidin S	protein synthesis	338082	382398	386116	362708	375294	397440	396106	0.00346338	0.144061	0.160793	0.0163717	0.119545	0.779851	1
PM19	F07	Blasticidin S	protein synthesis	338082	382398	386116	362708	375294	397440	396106	0.00346338	0.144061	0.160793	0.0163717	0.119545	0.779851	1
PM19	F08	Blasticidin S	protein synthesis	338082	382398	386116	362708	375294	397440	396106	0.00346338	0.144061	0.160793	0.0163717	0.119545	0.779851	1
PM19	F09	Sodium caprylate	respiration, ionophore, H+	204400	234986	233317	204537	195501	262252	221808	0.196805	0.42201	0.343794	0.205669	0.106933	0.262467	1
PM19	F10	Sodium caprylate	respiration, ionophore, H+	204400	234986	233317	204537	195501	262252	221808	0.196805	0.42201	0.343794	0.205669	0.106933	0.262467	1
PM19	F11	Sodium caprylate	respiration, ionophore, H+	204400	234986	233317	204537	195501	262252	221808	0.196805	0.42201	0.343794	0.205669	0.106933	0.262467	1
PM19	F12	Sodium caprylate	respiration, ionophore, H+	204400	234986	233317	204537	195501	262252	221808	0.196805	0.42201	0.343794	0.205669	0.106933	0.262467	1
PM19	G01	Lauryl sulfobetaine	membrane, detergent, zwitterionic	305808	299933	267668	272859	256998	304112	307329	0.763313	0.472055	0.0146367	0.0192935	0.0174053	0.768354	1
PM19	G02	Lauryl sulfobetaine	membrane, detergent, zwitterionic	305808	299933	267668	272859	256998	304112	307329	0.763313	0.472055	0.0146367	0.0192935	0.0174053	0.768354	1
PM19	G03	Lauryl sulfobetaine	membrane, detergent, zwitterionic	305808	299933	267668	272859	256998	304112	307329	0.763313	0.472055	0.0146367	0.0192935	0.0174053	0.768354	1
PM19	G04	Lauryl sulfobetaine	membrane, detergent, zwitterionic	305808	299933	267668	272859	256998	304112	307329	0.763313	0.472055	0.0146367	0.0192935	0.0174053	0.768354	1
PM19	G05	Dihydrostreptomycin	protein synthesis, 30S ribosomal subunit, aminoglycoside	349686	390050	389150	360438	378512	389462	390462	0.017422	0.86758	0.617297	0.00459203	0.225052	0.828051	1
PM19	G06	Dihydrostreptomycin	protein synthesis, 30S ribosomal subunit, aminoglycoside	349686	390050	389150	360438	378512	389462	390462	0.017422	0.86758	0.617297	0.00459203	0.225052	0.828051	1
PM19	G07	Dihydrostreptomycin	protein synthesis, 30S ribosomal subunit, aminoglycoside	349686	390050	389150	360438	378512	389462	390462	0.017422	0.86758	0.617297	0.00459203	0.225052	0.828051	1
PM19	G08	Dihydrostreptomycin	protein synthesis, 30S ribosomal subunit, aminoglycoside	349686	390050	389150	360438	378512	389462	390462	0.017422	0.86758	0.617297	0.00459203	0.225052	0.828051	1
PM19	G09	Hydroxylamine	DNA damage, mutagen, antifolate (inhibits thymine and methionine synthesis)	340505	377924	374008	356890	365156	382692	378838	0.0352971	0.919516	0.641134	0.132957	0.208237	0.673086	1
PM19	G10	Hydroxylamine	DNA damage, mutagen, antifolate (inhibits thymine and methionine synthesis)	340505	377924	374008	356890	365156	382692	378838	0.0352971	0.919516	0.641134	0.132957	0.208237	0.673086	1
PM19	G11	Hydroxylamine	DNA damage, mutagen, antifolate (inhibits thymine and methionine synthesis)	340505	377924	374008	356890	365156	382692	378838	0.0352971	0.919516	0.641134	0.132957	0.208237	0.673086	1
PM19	G12	Hydroxylamine	DNA damage, mutagen, antifolate (inhibits thymine and methionine synthesis)	340505	377924	374008	356890	365156	382692	378838	0.0352971	0.919516	0.641134	0.132957	0.208237	0.673086	1
PM19	H01	Hexamminecobalt (III) Chloride	DNA synthesis	345865	344026	345107	303646	343742	351894	361862	0.160123	0.0862035	0.0985535	0.0279366	0.0564446	0.315732	1
PM19	H02	Hexamminecobalt (III) Chloride	DNA synthesis	345865	344026	345107	303646	343742	351894	361862	0.160123	0.0862035	0.0985535	0.0279366	0.0564446	0.315732	1
PM19	H03	Hexamminecobalt (III) Chloride	DNA synthesis	345865	344026	345107	303646	343742	351894	361862	0.160123	0.0862035	0.0985535	0.0279366	0.0564446	0.315732	1
PM19	H04	Hexamminecobalt (III) Chloride	DNA synthesis	345865	344026	345107	303646	343742	351894	361862	0.160123	0.0862035	0.0985535	0.0279366	0.0564446	0.315732	1
PM19	H05	Thioglycerol	reducing agent, thiol, adenosyl methionine antagonist	329324	342819	336434	353949	323970	355760	354338	0.119553	0.422369	0.0608978	0.958336	0.174229	0.761636	1
PM19	H06	Thioglycerol	reducing agent, thiol, adenosyl methionine antagonist	329324	342819	336434	353949	323970	355760	354338	0.119553	0.422369	0.0608978	0.958336	0.174229	0.761636	1
PM19	H07	Thioglycerol	reducing agent, thiol, adenosyl methionine antagonist	329324	342819	336434	353949	323970	355760	354338	0.119553	0.422369	0.0608978	0.958336	0.174229	0.761636	1
PM19	H08	Thioglycerol	reducing agent, thiol, adenosyl methionine antagonist	329324	342819	336434	353949	323970	355760	354338	0.119553	0.422369	0.0608978	0.958336	0.174229	0.761636	1
PM19	H09	Polymyxin B	membrane, disorganize structure	362636	386130	382007	374456	366708	384448	387540	0.114876	0.52852	0.403629	0.0316855	0.149861	0.662197	1
PM19	H10	Polymyxin B	membrane, disorganize structure	362636	386130	382007	374456	366708	384448	387540	0.114876	0.52852	0.403629	0.0316855	0.149861	0.662197	1
PM19	H11	Polymyxin B	membrane, disorganize structure	362636	386130	382007	374456	366708	384448	387540	0.114876	0.52852	0.403629	0.0316855	0.149861	0.662197	1
PM19	H12	Polymyxin B	membrane, disorganize structure	362636	386130	382007	374456	366708	384448	387540	0.114876	0.52852	0.403629	0.0316855	0.149861	0.662197	1
PM20	A01	Amitriptyline	membrane, transport	209537	269220	245090	203766	219579	236248	253381	0.057991	0.342715	0.518896	0.0469917	0.0881418	0.273725	1
PM20	A02	Amitriptyline	membrane, transport	209537	269220	245090	203766	219579	236248	253381	0.057991	0.342715	0.518896	0.0469917	0.0881418	0.273725	1
PM20	A03	Amitriptyline	membrane, transport	209537	269220	245090	203766	219579	236248	253381	0.057991	0.342715	0.518896	0.0469917	0.0881418	0.273725	1
PM20	A04	Amitriptyline	membrane, transport	209537	269220	245090	203766	219579	236248	253381	0.057991	0.342715	0.518896	0.0469917	0.0881418	0.273725	1
PM20	A05	Apramycin	protein synthesis, 30S ribosomal subunit, aminoglycoside	331005	377549	373183	343500	358046	380420	381798	0.0123368	0.735483	0.398167	0.0850686	0.161267	0.84623	1
PM20	A06	Apramycin	protein synthesis, 30S ribosomal subunit, aminoglycoside	331005	377549	373183	343500	358046	380420	381798	0.0123368	0.735483	0.398167	0.0850686	0.161267	0.84623	1
PM20	A07	Apramycin	protein synthesis, 30S ribosomal subunit, aminoglycoside	331005	377549	373183	343500	358046	380420	381798	0.0123368	0.735483	0.398167	0.0850686	0.161267	0.84623	1
PM20	A08	Apramycin	protein synthesis, 30S ribosomal subunit, aminoglycoside	331005	377549	373183	343500	358046	380420	381798	0.0123368	0.735483	0.398167	0.0850686	0.161267	0.84623	1
PM20	A09	Benserazide	amino acid metabolism, arromatic amino acid decarboxylase inhibitor (gp, gn, yst, m)	396929	430576	426926	405570	422365	431948	432141	0.0908155	0.916169	0.666976	0.164749	0.534955	0.986722	1
PM20	A10	Benserazide	amino acid metabolism, arromatic amino acid decarboxylase inhibitor (gp, gn, yst, m)	396929	430576	426926	405570	422365	431948	432141	0.0908155	0.916169	0.666976	0.164749	0.534955	0.986722	1
PM20	A11	Benserazide	amino acid metabolism, arromatic amino acid decarboxylase inhibitor (gp, gn, yst, m)	396929	430576	426926	405570	422365	431948	432141	0.0908155	0.916169	0.666976	0.164749	0.534955	0.986722	1
PM20	A12	Benserazide	amino acid metabolism, arromatic amino acid decarboxylase inhibitor (gp, gn, yst, m)	396929	430576	426926	405570	422365	431948	432141	0.0908155	0.916169	0.666976	0.164749	0.534955	0.986722	1
PM20	B01	Orphenadrine	cholinergic antagonist	176455	240285	204820	189762	208021	213247	226428	0.0657579	0.507653	0.247154	0.128059	0.33587	0.427682	1
PM20	B02	Orphenadrine	cholinergic antagonist	176455	240285	204820	189762	208021	213247	226428	0.0657579	0.507653	0.247154	0.128059	0.33587	0.427682	1
PM20	B03	Orphenadrine	cholinergic antagonist	176455	240285	204820	189762	208021	213247	226428	0.0657579	0.507653	0.247154	0.128059	0.33587	0.427682	1
PM20	B04	Orphenadrine	cholinergic antagonist	176455	240285	204820	189762	208021	213247	226428	0.0657579	0.507653	0.247154	0.128059	0.33587	0.427682	1
PM20	B05	D,L-Propranolol	beta-adrenergic blocker	249277	300281	288250	257778	286244	291375	297004	0.00137778	0.354228	0.173398	0.0212265	0.279893	0.0390711	1
PM20	B06	D,L-Propranolol	beta-adrenergic blocker	249277	300281	288250	257778	286244	291375	297004	0.00137778	0.354228	0.173398	0.0212265	0.279893	0.0390711	1
PM20	B07	D,L-Propranolol	beta-adrenergic blocker	249277	300281	288250	257778	286244	291375	297004	0.00137778	0.354228	0.173398	0.0212265	0.279893	0.0390711	1
PM20	B08	D,L-Propranolol	beta-adrenergic blocker	249277	300281	288250	257778	286244	291375	297004	0.00137778	0.354228	0.173398	0.0212265	0.279893	0.0390711	1
PM20	B09	Tetrazolium violet	respiration, uncoupler	120722	136804	126312	112420	132445	132278	138740	0.0779225	0.779797	0.169492	0.0479886	0.401878	0.365212	1
PM20	B10	Tetrazolium violet	respiration, uncoupler	120722	136804	126312	112420	132445	132278	138740	0.0779225	0.779797	0.169492	0.0479886	0.401878	0.365212	1
PM20	B11	Tetrazolium violet	respiration, uncoupler	120722	136804	126312	112420	132445	132278	138740	0.0779225	0.779797	0.169492	0.0479886	0.401878	0.365212	1
PM20	B12	Tetrazolium violet	respiration, uncoupler	120722	136804	126312	112420	132445	132278	138740	0.0779225	0.779797	0.169492	0.0479886	0.401878	0.365212	1
PM20	C01	Thioridazine	respiration, uncoupler	157396	168008	134826	133196	136528	171816	172202	0.466157	0.908767	0.152298	0.140768	0.160316	0.983892	1
PM20	C02	Thioridazine	respiration, uncoupler	157396	168008	134826	133196	136528	171816	172202	0.466157	0.908767	0.152298	0.140768	0.160316	0.983892	1
PM20	C03	Thioridazine	respiration, uncoupler	157396	168008	134826	133196	136528	171816	172202	0.466157	0.908767	0.152298	0.140768	0.160316	0.983892	1
PM20	C04	Thioridazine	respiration, uncoupler	157396	168008	134826	133196	136528	171816	172202	0.466157	0.908767	0.152298	0.140768	0.160316	0.983892	1
PM20	C05	Atropine	acetylcholine receptor, antagonist	257097	337020	306814	265433	324790	309609	325574	0.00255652	0.034623	0.00378974	0.0200146	0.926525	0.0183857	1
PM20	C06	Atropine	acetylcholine receptor, antagonist	257097	337020	306814	265433	324790	309609	325574	0.00255652	0.034623	0.00378974	0.0200146	0.926525	0.0183857	1
PM20	C07	Atropine	acetylcholine receptor, antagonist	257097	337020	306814	265433	324790	309609	325574	0.00255652	0.034623	0.00378974	0.0200146	0.926525	0.0183857	1
PM20	C08	Atropine	acetylcholine receptor, antagonist	257097	337020	306814	265433	324790	309609	325574	0.00255652	0.034623	0.00378974	0.0200146	0.926525	0.0183857	1
PM20	C09	Ornidazole	protein glycosolation	121928	144688	141875	61796	143876	136290	138962	0.291831	0.674043	0.825475	0.0331301	0.79085	0.840599	1
PM20	C10	Ornidazole	protein glycosolation	121928	144688	141875	61796	143876	136290	138962	0.291831	0.674043	0.825475	0.0331301	0.79085	0.840599	1
PM20	C11	Ornidazole	protein glycosolation	121928	144688	141875	61796	143876	136290	138962	0.291831	0.674043	0.825475	0.0331301	0.79085	0.840599	1
PM20	C12	Ornidazole	protein glycosolation	121928	144688	141875	61796	143876	136290	138962	0.291831	0.674043	0.825475	0.0331301	0.79085	0.840599	1
PM20	D01	Proflavine	flavone, antibacterial	250932	249620	241839	200610	248472	243579	272544	0.595556	0.455073	0.316005	0.106228	0.652735	0.3357	1
PM20	D02	Proflavine	flavone, antibacterial	250932	249620	241839	200610	248472	243579	272544	0.595556	0.455073	0.316005	0.106228	0.652735	0.3357	1
PM20	D03	Proflavine	flavone, antibacterial	250932	249620	241839	200610	248472	243579	272544	0.595556	0.455073	0.316005	0.106228	0.652735	0.3357	1
PM20	D04	Proflavine	flavone, antibacterial	250932	249620	241839	200610	248472	243579	272544	0.595556	0.455073	0.316005	0.106228	0.652735	0.3357	1
PM20	D05	Ciprofloxacin	DNA unwinding, gyrase (GN), topoisomerase (GP), fluoroquinolone	307478	380470	370414	328491	348352	369770	336298	0.48199	0.321216	0.417019	0.840315	0.791995	0.425892	1
PM20	D06	Ciprofloxacin	DNA unwinding, gyrase (GN), topoisomerase (GP), fluoroquinolone	307478	380470	370414	328491	348352	369770	336298	0.48199	0.321216	0.417019	0.840315	0.791995	0.425892	1
PM20	D07	Ciprofloxacin	DNA unwinding, gyrase (GN), topoisomerase (GP), fluoroquinolone	307478	380470	370414	328491	348352	369770	336298	0.48199	0.321216	0.417019	0.840315	0.791995	0.425892	1
PM20	D08	Ciprofloxacin	DNA unwinding, gyrase (GN), topoisomerase (GP), fluoroquinolone	307478	380470	370414	328491	348352	369770	336298	0.48199	0.321216	0.417019	0.840315	0.791995	0.425892	1
PM20	D09	18-Crown-6 ether	respiration, ionophore, H+	247839	326805	293292	267060	304910	285306	290914	0.00166126	0.0874987	0.0449261	0.140458	0.714087	0.0616343	1
PM20	D10	18-Crown-6 ether	respiration, ionophore, H+	247839	326805	293292	267060	304910	285306	290914	0.00166126	0.0874987	0.0449261	0.140458	0.714087	0.0616343	1
PM20	D11	18-Crown-6 ether	respiration, ionophore, H+	247839	326805	293292	267060	304910	285306	290914	0.00166126	0.0874987	0.0449261	0.140458	0.714087	0.0616343	1
PM20	D12	18-Crown-6 ether	respiration, ionophore, H+	247839	326805	293292	267060	304910	285306	290914	0.00166126	0.0874987	0.0449261	0.140458	0.714087	0.0616343	1
PM20	E01	Crystal Violet	respiration, uncoupler	206777	179858	197791	197528	214140	216444	200064	0.453716	0.421105	0.949244	0.600809	0.173634	0.531619	1
PM20	E02	Crystal Violet	respiration, uncoupler	206777	179858	197791	197528	214140	216444	200064	0.453716	0.421105	0.949244	0.600809	0.173634	0.531619	1
PM20	E03	Crystal Violet	respiration, uncoupler	206777	179858	197791	197528	214140	216444	200064	0.453716	0.421105	0.949244	0.600809	0.173634	0.531619	1
PM20	E04	Crystal Violet	respiration, uncoupler	206777	179858	197791	197528	214140	216444	200064	0.453716	0.421105	0.949244	0.600809	0.173634	0.531619	1
PM20	E05	Dodine	membrane permeability, guanidine, fungicide	181394	300292	285414	183916	278888	284320	218796	0.046972	0.0098869	0.0214701	0.08705	0.0180959	0.0170366	1
PM20	E06	Dodine	membrane permeability, guanidine, fungicide	181394	300292	285414	183916	278888	284320	218796	0.046972	0.0098869	0.0214701	0.08705	0.0180959	0.0170366	1
PM20	E07	Dodine	membrane permeability, guanidine, fungicide	181394	300292	285414	183916	278888	284320	218796	0.046972	0.0098869	0.0214701	0.08705	0.0180959	0.0170366	1
PM20	E08	Dodine	membrane permeability, guanidine, fungicide	181394	300292	285414	183916	278888	284320	218796	0.046972	0.0098869	0.0214701	0.08705	0.0180959	0.0170366	1
PM20	E09	Hexachlorophene	membrane, electron transport	100593	130232	130354	111426	87295.5	192184	95327	0.890737	0.216125	0.215433	0.498692	0.743651	0.038833	1
PM20	E10	Hexachlorophene	membrane, electron transport	100593	130232	130354	111426	87295.5	192184	95327	0.890737	0.216125	0.215433	0.498692	0.743651	0.038833	1
PM20	E11	Hexachlorophene	membrane, electron transport	100593	130232	130354	111426	87295.5	192184	95327	0.890737	0.216125	0.215433	0.498692	0.743651	0.038833	1
PM20	E12	Hexachlorophene	membrane, electron transport	100593	130232	130354	111426	87295.5	192184	95327	0.890737	0.216125	0.215433	0.498692	0.743651	0.038833	1
PM20	F01	4-Hydroxycoumarin	DNA intercalator	312396	364276	352384	317944	337524	357190	360570	0.00610938	0.595656	0.258132	0.00785096	0.03653	0.616808	1
PM20	F02	4-Hydroxycoumarin	DNA intercalator	312396	364276	352384	317944	337524	357190	360570	0.00610938	0.595656	0.258132	0.00785096	0.03653	0.616808	1
PM20	F03	4-Hydroxycoumarin	DNA intercalator	312396	364276	352384	317944	337524	357190	360570	0.00610938	0.595656	0.258132	0.00785096	0.03653	0.616808	1
PM20	F04	4-Hydroxycoumarin	DNA intercalator	312396	364276	352384	317944	337524	357190	360570	0.00610938	0.595656	0.258132	0.00785096	0.03653	0.616808	1
PM20	F05	Oxytetracycline	protein synthesis, 30S ribosomal subunit, tetracycline	291578	356195	319614	287941	301406	381112	345528	0.186902	0.778963	0.387897	0.145683	0.207063	0.273239	1
PM20	F06	Oxytetracycline	protein synthesis, 30S ribosomal subunit, tetracycline	291578	356195	319614	287941	301406	381112	345528	0.186902	0.778963	0.387897	0.145683	0.207063	0.273239	1
PM20	F07	Oxytetracycline	protein synthesis, 30S ribosomal subunit, tetracycline	291578	356195	319614	287941	301406	381112	345528	0.186902	0.778963	0.387897	0.145683	0.207063	0.273239	1
PM20	F08	Oxytetracycline	protein synthesis, 30S ribosomal subunit, tetracycline	291578	356195	319614	287941	301406	381112	345528	0.186902	0.778963	0.387897	0.145683	0.207063	0.273239	1
PM20	F09	Pridinol	cholinergic antagonist	178580	233559	223554	178160	247305	250320	213262	0.0626922	0.268819	0.437158	0.205549	0.424035	0.0990608	1
PM20	F10	Pridinol	cholinergic antagonist	178580	233559	223554	178160	247305	250320	213262	0.0626922	0.268819	0.437158	0.205549	0.424035	0.0990608	1
PM20	F11	Pridinol	cholinergic antagonist	178580	233559	223554	178160	247305	250320	213262	0.0626922	0.268819	0.437158	0.205549	0.424035	0.0990608	1
PM20	F12	Pridinol	cholinergic antagonist	178580	233559	223554	178160	247305	250320	213262	0.0626922	0.268819	0.437158	0.205549	0.424035	0.0990608	1
PM20	G01	Captan	multisite, carbamate, fungicide	237478	251018	240687	138066	198943	275662	279624	0.197992	0.629448	0.443564	0.0436879	0.0670843	0.944729	1
PM20	G02	Captan	multisite, carbamate, fungicide	237478	251018	240687	138066	198943	275662	279624	0.197992	0.629448	0.443564	0.0436879	0.0670843	0.944729	1
PM20	G03	Captan	multisite, carbamate, fungicide	237478	251018	240687	138066	198943	275662	279624	0.197992	0.629448	0.443564	0.0436879	0.0670843	0.944729	1
PM20	G04	Captan	multisite, carbamate, fungicide	237478	251018	240687	138066	198943	275662	279624	0.197992	0.629448	0.443564	0.0436879	0.0670843	0.944729	1
PM20	G05	3,5-Dinitrobenzene	respiration, ionophore, H+	267699	304850	330054	241162	282588	325628	295412	0.109496	0.518518	0.0832976	0.0405096	0.329193	0.0666797	1
PM20	G06	3,5-Dinitrobenzene	respiration, ionophore, H+	267699	304850	330054	241162	282588	325628	295412	0.109496	0.518518	0.0832976	0.0405096	0.329193	0.0666797	1
PM20	G07	3,5-Dinitrobenzene	respiration, ionophore, H+	267699	304850	330054	241162	282588	325628	295412	0.109496	0.518518	0.0832976	0.0405096	0.329193	0.0666797	1
PM20	G08	3,5-Dinitrobenzene	respiration, ionophore, H+	267699	304850	330054	241162	282588	325628	295412	0.109496	0.518518	0.0832976	0.0405096	0.329193	0.0666797	1
PM20	G09	8-Hydroxyquinoline	chelator, lipophilic, RNA synthesis	228856	236768	216610	163010	263635	208015	194985	0.387756	0.375505	0.536451	0.580115	0.415833	0.70272	1
PM20	G10	8-Hydroxyquinoline	chelator, lipophilic, RNA synthesis	228856	236768	216610	163010	263635	208015	194985	0.387756	0.375505	0.536451	0.580115	0.415833	0.70272	1
PM20	G11	8-Hydroxyquinoline	chelator, lipophilic, RNA synthesis	228856	236768	216610	163010	263635	208015	194985	0.387756	0.375505	0.536451	0.580115	0.415833	0.70272	1
PM20	G12	8-Hydroxyquinoline	chelator, lipophilic, RNA synthesis	228856	236768	216610	163010	263635	208015	194985	0.387756	0.375505	0.536451	0.580115	0.415833	0.70272	1
PM20	H01	Patulin	microtubulin polymerization inhibitor, antifungal	336912	353646	342347	315183	313394	360118	366308	0.142466	0.703011	0.0692426	0.0308804	0.123856	0.450353	1
PM20	H02	Patulin	microtubulin polymerization inhibitor, antifungal	336912	353646	342347	315183	313394	360118	366308	0.142466	0.703011	0.0692426	0.0308804	0.123856	0.450353	1
PM20	H03	Patulin	microtubulin polymerization inhibitor, antifungal	336912	353646	342347	315183	313394	360118	366308	0.142466	0.703011	0.0692426	0.0308804	0.123856	0.450353	1
PM20	H04	Patulin	microtubulin polymerization inhibitor, antifungal	336912	353646	342347	315183	313394	360118	366308	0.142466	0.703011	0.0692426	0.0308804	0.123856	0.450353	1
PM20	H05	Tolylfluanid	fungicide, phenylsulphamide	216804	329870	273490	59608.5	206396	360471	251417	0.646111	0.392351	0.809669	0.0697469	0.482555	0.168231	1
PM20	H06	Tolylfluanid	fungicide, phenylsulphamide	216804	329870	273490	59608.5	206396	360471	251417	0.646111	0.392351	0.809669	0.0697469	0.482555	0.168231	1
PM20	H07	Tolylfluanid	fungicide, phenylsulphamide	216804	329870	273490	59608.5	206396	360471	251417	0.646111	0.392351	0.809669	0.0697469	0.482555	0.168231	1
PM20	H08	Tolylfluanid	fungicide, phenylsulphamide	216804	329870	273490	59608.5	206396	360471	251417	0.646111	0.392351	0.809669	0.0697469	0.482555	0.168231	1
PM20	H09	Oleandomycin	protein synthesis, 50S ribosomal subunit, macrolide	67494	75164	71246.5	65603.5	74994.5	80234	73655.5	0.803209	0.955319	0.924118	0.764229	0.960686	0.792271	1
PM20	H10	Oleandomycin	protein synthesis, 50S ribosomal subunit, macrolide	67494	75164	71246.5	65603.5	74994.5	80234	73655.5	0.803209	0.955319	0.924118	0.764229	0.960686	0.792271	1
PM20	H11	Oleandomycin	protein synthesis, 50S ribosomal subunit, macrolide	67494	75164	71246.5	65603.5	74994.5	80234	73655.5	0.803209	0.955319	0.924118	0.764229	0.960686	0.792271	1
PM20	H12	Oleandomycin	protein synthesis, 50S ribosomal subunit, macrolide	67494	75164	71246.5	65603.5	74994.5	80234	73655.5	0.803209	0.955319	0.924118	0.764229	0.960686	0.792271	1

## Sheet: All 6 strains
Table S4: Growth data of 6 BG strains relative to BG 1942
				P-value						Fold Change (Query/1942)
plate	well	pheno	mode	1013-2	Detrick-1	Detrick-2	1013-1	Detrick-3	Dugway	1013-2	Detrick-1	Detrick-2	1013-1	Detrick-3	Dugway
PM05	D04	(-)Shikimic Acid	Nutritional suppliment,,,,,,,,,,,,,,,,,	0.0139253	0.0283524	0.471476	0.0516166	0.0174392	0.00776554	0.673955	1.09305	0.982664	0.671187	0.915056	0.737786
PM05	C09	(5) 4-Amino-Imidazole-4(5)-Carboxamide	Nutritional suppliment,Imidazole,-,-,,,Purine Metabolism,-,-,-,-,-,-,-,-,-,-,-	0.00165299	0.185988	0.788212	0.0136794	0.0525029	0.011765	0.678611	0.953438	1.01737	0.697604	0.93369	0.816144
PM09	A01	1% NaCl	osmotic sensitivity, NaCl	0.00259	0.05432	0.0301942	0.00221796	0.12788	0.0584921	0.920683	0.955729	0.98627	0.936849	0.957383	0.986008
PM09	E01	1% Sodium Formate	osmotic sensitivity, sodium formate	0.342954	0.438078	0.645135	0.104515	0.205701	0.232746	0.872748	1.01458	0.991016	0.955241	0.947172	0.972684
PM09	F01	1% Sodium Lactate	osmotic sensitivity, sodium lactate	0.00175547	0.844114	0.693844	0.0543584	0.216563	0.494837	0.75424	1.00471	1.00691	0.945627	0.966873	0.975397
PM15	C09	1,10-Phenanthroline	chelator, Fe++, Zn++, divalent metal ions	0.0542564	0.604339	0.911634	0.296224	0.326398	0.359976	0.719595	0.953397	0.991653	0.83513	0.904954	0.921606
PM15	C10	1,10-Phenanthroline	chelator, Fe++, Zn++, divalent metal ions	0.0542564	0.604339	0.911634	0.296224	0.326398	0.359976	0.719595	0.953397	0.991653	0.83513	0.904954	0.921606
PM15	C11	1,10-Phenanthroline	chelator, Fe++, Zn++, divalent metal ions	0.0542564	0.604339	0.911634	0.296224	0.326398	0.359976	0.719595	0.953397	0.991653	0.83513	0.904954	0.921606
PM15	C12	1,10-Phenanthroline	chelator, Fe++, Zn++, divalent metal ions	0.0542564	0.604339	0.911634	0.296224	0.326398	0.359976	0.719595	0.953397	0.991653	0.83513	0.904954	0.921606
PM01	D04	1,2-Propanediol	C-Source,alcohol,3 carbon,,,,Glycolosis,oxaloacetate,Pyruvate,pyruvate metabolism,-,-,-,-,-,-,-,-	0.0589246	0.121718	0.0625047	0.255675	0.0977124	0.149517	0.54387	1.27626	0.642109	1.1922	0.655548	0.759095
PM09	D10	10% Ethylene Glycol	osmotic sensitivity, ethylene glycol	0.00681522	0.0831134	0.211276	0.0669974	0.141191	0.312989	0.586518	0.95252	0.965613	0.899799	0.947622	0.972271
PM09	A12	10% NaCl	osmotic sensitivity, NaCl	0.00921169	0.0499894	0.00187233	0.0259254	0.14246	0.0234328	0.812249	0.923545	0.875438	0.676836	0.652415	0.806067
PM09	F10	10% Sodium Lactate	osmotic sensitivity, sodium lactate	0.4013	0.343554	0.39456	0.563947	0.569219	0.749918	0.385437	1.74947	1.62563	0.600138	1.40268	1.2192
PM09	G12	100mM Ammonium Sulfate pH 8	toxicity, ammonia	0.053471	0.620355	0.84831	0.128408	0.353584	0.67384	0.850431	0.977014	0.991585	0.89921	0.960329	0.982249
PM02	F01	D-Lactic Acid Methyl Ester	C-Source,carboxylate,3 carbon,,,,Pyruvate metabolism,-,-,-,-,-,-,-,-,-,-,-	0.000538014	0.00209822	0.00258858	0.0100863	0.00134328	0.0157393	0.233198	0.425564	0.394632	0.831126	0.298117	0.880954
PM09	H06	100mM Sodium Nitrate	toxicity, nitrate	0.565838	0.303273	0.983932	0.0991598	0.735908	0.737715	0.9566	1.02175	0.999585	0.914756	0.984567	1.005
PM09	H12	100mM Sodium Nitrite	toxicity, nitrite	0.0233854	0.0877961	0.99259	0.00448505	0.0111802	0.644376	0.749798	1.04489	1.00016	0.767958	0.75769	0.968961
PM09	G03	100mM Sodium Phosphate pH 7	toxicity, phosphate	0.0139963	0.535898	0.790504	0.487926	0.899103	0.724794	0.727491	1.02059	1.00834	0.976004	1.00483	1.01173
PM09	G09	10mM Ammonium Sulfate pH 8	toxicity, ammonia	0.0196162	0.930523	0.282327	0.00399085	0.195962	0.631989	0.67456	0.998636	1.02049	0.936152	0.990482	0.984028
PM09	H01	10mM Sodium Nitrate	toxicity, nitrate	0.162591	0.530648	0.326436	0.116892	0.380576	0.28943	0.964026	0.980213	0.887369	0.946954	0.981845	1.05531
PM09	H07	10mM Sodium Nitrite	toxicity, nitrite	0.127352	0.912024	0.182195	0.00828942	0.230375	0.352828	0.79903	1.00088	0.981263	0.928393	0.97343	1.00649
PM02	A09	Inulin	C-Source,carbohydrate,oligosaccharide,,,,-,-,-,-,-,-,-,-,-,-,-,-	0.773443	0.000270418	0.000406912	0.0532963	0.00923206	0.411597	1.12681	3.32901	2.80759	1.15867	2.4082	1.08864
PM09	F12	12% Sodium Lactate	osmotic sensitivity, sodium lactate	0.288325	0.0553797	0.0696121	0.433796	0.975192	0.211516	0.619004	2.0951	1.96181	0.743132	1.01388	1.4768
PM09	D11	15% Ethylene Glycol	osmotic sensitivity, ethylene glycol	0.00244156	0.8884	0.0274393	0.00148667	0.0509383	0.0224305	0.775187	0.997515	0.98423	0.891376	0.966641	0.96744
PM20	D09	18-Crown-6 ether	respiration, ionophore, H+	0.00166126	0.0874987	0.0449261	0.140458	0.714087	0.0616343	0.851934	1.12338	1.00818	0.918003	1.04811	0.980723
PM20	D10	18-Crown-6 ether	respiration, ionophore, H+	0.00166126	0.0874987	0.0449261	0.140458	0.714087	0.0616343	0.851934	1.12338	1.00818	0.918003	1.04811	0.980723
PM20	D11	18-Crown-6 ether	respiration, ionophore, H+	0.00166126	0.0874987	0.0449261	0.140458	0.714087	0.0616343	0.851934	1.12338	1.00818	0.918003	1.04811	0.980723
PM20	D12	18-Crown-6 ether	respiration, ionophore, H+	0.00166126	0.0874987	0.0449261	0.140458	0.714087	0.0616343	0.851934	1.12338	1.00818	0.918003	1.04811	0.980723
PM16	D01	1-Chloro-2,4-dinitrobenzene	oxidation, glutathione	0.24152	0.671319	0.947835	0.0720133	0.567425	0.631462	1.11103	0.978677	1.00347	0.50985	1.10966	1.10032
PM16	D02	1-Chloro-2,4-dinitrobenzene	oxidation, glutathione	0.24152	0.671319	0.947835	0.0720133	0.567425	0.631462	1.11103	0.978677	1.00347	0.50985	1.10966	1.10032
PM16	D03	1-Chloro-2,4-dinitrobenzene	oxidation, glutathione	0.24152	0.671319	0.947835	0.0720133	0.567425	0.631462	1.11103	0.978677	1.00347	0.50985	1.10966	1.10032
PM16	D04	1-Chloro-2,4-dinitrobenzene	oxidation, glutathione	0.24152	0.671319	0.947835	0.0720133	0.567425	0.631462	1.11103	0.978677	1.00347	0.50985	1.10966	1.10032
PM14	C05	1-Hydroxy- pyridine-2-thione	Membrane, interferes permeability (Ionophores)	0.0333675	0.232259	0.0479949	0.0356737	0.314828	0.333642	0.904308	1.05287	1.0864	0.851539	1.04245	0.969231
PM14	C06	1-Hydroxy- pyridine-2-thione	Membrane, interferes permeability (Ionophores)	0.0333675	0.232259	0.0479949	0.0356737	0.314828	0.333642	0.904308	1.05287	1.0864	0.851539	1.04245	0.969231
PM14	C07	1-Hydroxy- pyridine-2-thione	Membrane, interferes permeability (Ionophores)	0.0333675	0.232259	0.0479949	0.0356737	0.314828	0.333642	0.904308	1.05287	1.0864	0.851539	1.04245	0.969231
PM14	C08	1-Hydroxy- pyridine-2-thione	Membrane, interferes permeability (Ionophores)	0.0333675	0.232259	0.0479949	0.0356737	0.314828	0.333642	0.904308	1.05287	1.0864	0.851539	1.04245	0.969231
PM04	H03	1-Thio-b-D-Glucose	S-Source,carbohydrate,hexose,glucose,sulfur,,Glycolosis,glucose,-,-,-,-,-,-,-,-,-,-	0.754199	0.0773169	0.0931183	0.687078	0.131273	0.877145	1.05411	1.63936	1.54674	0.908813	1.56345	0.963627
PM18	H05	2- Phenylphenol	DNA intercalator	0.0051424	0.272383	0.0144106	0.032015	0.179289	0.191035	0.812554	0.932871	0.914405	0.874813	0.908097	0.930579
PM18	H06	2- Phenylphenol	DNA intercalator	0.0051424	0.272383	0.0144106	0.032015	0.179289	0.191035	0.812554	0.932871	0.914405	0.874813	0.908097	0.930579
PM18	H07	2- Phenylphenol	DNA intercalator	0.0051424	0.272383	0.0144106	0.032015	0.179289	0.191035	0.812554	0.932871	0.914405	0.874813	0.908097	0.930579
PM18	H08	2- Phenylphenol	DNA intercalator	0.0051424	0.272383	0.0144106	0.032015	0.179289	0.191035	0.812554	0.932871	0.914405	0.874813	0.908097	0.930579
PM09	A02	2% NaCl	osmotic sensitivity, NaCl	0.160028	0.771105	0.972784	0.421859	0.593002	0.58361	0.893294	1.0147	0.9983	0.95747	1.0265	1.02853
PM09	E02	2% Sodium Formate	osmotic sensitivity, sodium formate	0.00171623	0.502786	0.810878	0.146225	0.152474	0.542944	0.811837	1.01829	1.00907	0.902304	0.972818	0.992544
PM09	F02	2% Sodium Lactate	osmotic sensitivity, sodium lactate	0.0248593	0.629792	0.75855	0.135714	0.741061	0.759779	0.656132	1.02861	1.01684	0.905051	1.01708	0.977466
PM09	D05	2% Sodium Sulfate	osmotic sensitivity, Na2SO4	0.00126878	0.457954	0.262955	0.266613	0.946338	0.400873	0.629045	1.01255	1.03267	0.980043	0.997203	1.01396
PM09	E07	2% Urea	osmotic sensitivity, urea	0.0180488	0.209071	0.679514	0.0134161	0.0194549	0.428229	0.683021	0.985451	0.995446	0.852023	0.965126	0.996373
PM13	B05	2,2`-Dipyridyl	chelator, Fe++	0.0877711	0.59838	0.286723	0.133109	0.272808	0.756067	0.671414	1.09079	1.15057	0.735891	1.15627	1.03818
PM13	B06	2,2`-Dipyridyl	chelator, Fe++	0.0877711	0.59838	0.286723	0.133109	0.272808	0.756067	0.671414	1.09079	1.15057	0.735891	1.15627	1.03818
PM13	B07	2,2`-Dipyridyl	chelator, Fe++	0.0877711	0.59838	0.286723	0.133109	0.272808	0.756067	0.671414	1.09079	1.15057	0.735891	1.15627	1.03818
PM13	B08	2,2`-Dipyridyl	chelator, Fe++	0.0877711	0.59838	0.286723	0.133109	0.272808	0.756067	0.671414	1.09079	1.15057	0.735891	1.15627	1.03818
PM02	H10	2,3-Butanediol	C-Source,alcohol,4 carbon,,,,Pyruvate metabolism,-,-,-,-,-,-,-,-,-,-,-	0.172177	0.959158	0.467	0.632892	0.39532	0.52224	0.526299	0.988237	0.807142	0.881064	0.773089	0.839282
PM02	H11	2,3-Butanone	C-Source,carbohydrate,4 carbon,,,,Pyruvate metabolism,-,-,-,-,-,-,-,-,-,-,-	0.736895	0.787235	0.559431	0.413583	0.810188	0.301399	0.954972	1.04373	0.892393	0.831032	0.961833	0.797536
PM12	E01	2,4-Diamino-6,7-diisopropylpteridine	dihydrofolate reductase inhibitor	0.0429574	0.605098	0.676184	0.033368	0.289659	0.75095	0.86724	0.978092	0.985078	0.808379	0.962576	1.00966
PM12	E02	2,4-Diamino-6,7-diisopropylpteridine	dihydrofolate reductase inhibitor	0.0429574	0.605098	0.676184	0.033368	0.289659	0.75095	0.86724	0.978092	0.985078	0.808379	0.962576	1.00966
PM12	E03	2,4-Diamino-6,7-diisopropylpteridine	dihydrofolate reductase inhibitor	0.0429574	0.605098	0.676184	0.033368	0.289659	0.75095	0.86724	0.978092	0.985078	0.808379	0.962576	1.00966
PM12	E04	2,4-Diamino-6,7-diisopropylpteridine	dihydrofolate reductase inhibitor	0.0429574	0.605098	0.676184	0.033368	0.289659	0.75095	0.86724	0.978092	0.985078	0.808379	0.962576	1.00966
PM19	B09	2,4-Dinitrophenol	respiration, ionophore, H+	0.0105115	0.419195	0.012956	0.0159716	0.0533695	0.0972057	0.8505	0.962195	0.901015	0.868902	0.880058	0.940226
PM19	B10	2,4-Dinitrophenol	respiration, ionophore, H+	0.0105115	0.419195	0.012956	0.0159716	0.0533695	0.0972057	0.8505	0.962195	0.901015	0.868902	0.880058	0.940226
PM19	B11	2,4-Dinitrophenol	respiration, ionophore, H+	0.0105115	0.419195	0.012956	0.0159716	0.0533695	0.0972057	0.8505	0.962195	0.901015	0.868902	0.880058	0.940226
PM19	B12	2,4-Dinitrophenol	respiration, ionophore, H+	0.0105115	0.419195	0.012956	0.0159716	0.0533695	0.0972057	0.8505	0.962195	0.901015	0.868902	0.880058	0.940226
PM09	D12	20% Ethylene Glycol	osmotic sensitivity, ethylene glycol	0.0783189	0.0643408	0.0360206	0.0563689	0.278236	0.203574	0.910019	1.0473	1.0598	0.951819	1.01609	0.98002
PM03	D10	Ethylenediamine	N-Source,,,,,,,,,,,,,,,,,	0.0491849	0.345786	0.0481461	0.038655	0.119526	0.108345	0.452081	0.829328	0.472873	0.384025	0.638059	0.600828
PM09	G04	200mM Sodium Phosphate pH 7	toxicity, phosphate	0.131147	0.801501	0.979378	0.199993	0.732404	0.349832	0.793332	1.01117	0.998843	0.920932	0.984467	0.949997
PM09	G10	20mM Ammonium Sulfate pH 8	toxicity, ammonia	0.0342478	0.733946	0.242224	0.126649	0.705747	0.853163	0.757443	1.01055	1.04667	0.941076	1.01013	1.00622
PM09	G05	20mM Sodium Benzoate pH 5.2	toxicity, benzoate	0.0251772	0.191702	0.118379	0.193664	0.553028	0.90016	0.880127	1.03782	1.0758	0.899409	0.976055	0.995674
PM09	H02	20mM Sodium Nitrate	toxicity, nitrate	0.236254	0.38129	0.219443	0.0520311	0.102644	0.86913	0.947273	0.972447	0.936931	0.899975	0.922151	0.990013
PM09	H08	20mM Sodium Nitrite	toxicity, nitrite	0.205568	0.369005	0.989375	0.086298	0.353328	0.27238	0.884069	1.01343	0.999823	0.945754	0.977409	1.02172
PM09	G01	20mM Sodium Phosphate pH 7	toxicity, phosphate	0.0120277	0.506499	0.700946	0.672561	0.735788	0.344153	0.824108	1.02565	1.01399	0.989017	1.01307	1.02541
PM01	H12	2-Aminoethanol	C-Source,alcohol,2 carbon,amine,,,Glycolosis,G3P,glycerolipid metabolism,-,-,-,-,-,-,-,-,-	0.258142	0.22042	0.0938719	0.367986	0.284001	0.255658	0.800717	1.13283	0.680458	1.12705	0.922856	0.797147
PM04	E07	2-Aminoethyl Phosphonic Acid	P-Source,alcohol,2 carbon,,,,-,-,-,-,-,-,-,-,-,-,-,-	0.00252386	0.187525	0.170139	0.0205423	0.7323	0.326015	0.64415	1.23299	0.887449	0.543961	1.07871	0.777326
PM01	E11	2'-Deoxyadenosine	C-Source,nucleoside,purine,adenine,,,Purine Metabolism,-,-,-,-,-,-,-,-,-,-,-	0.0288457	0.169846	0.0255184	0.730588	0.103231	0.0249405	0.534416	1.21902	0.590327	0.971675	0.782329	0.644556
PM05	A12	2'-Deoxyadenosine	Nutritional suppliment,nucleoside,purine,adenine,,,Purine Metabolism,-,-,-,-,-,-,-,-,-,-,-	0.366822	0.329379	0.631377	0.279387	0.750988	0.234716	0.833299	0.872788	0.937822	0.868432	0.946846	0.867034
PM04	C05	2-Deoxy-D-Glucose 6-Phosphate	P-Source,carbohydrate,hexose,glucose,phosphate,,Glycolosis,glucose,-,-,-,-,-,-,-,-,-,-	0.440444	0.105699	0.553139	0.050036	0.23185	0.449061	0.876293	1.19168	1.06358	0.691226	1.1256	0.935704
PM02	B09	2-Deoxy-D-Ribose	C-Source,carbohydrate,pentose,ribose,,,Pentose and glucuronate interconversions,-,-,-,-,-,-,-,-,-,-	0.271574	0.312657	0.0608612	0.185642	0.0323054	0.274098	0.894712	0.948622	0.842927	0.872708	0.843869	0.941908
PM05	B12	2'-Deoxyguanosine	Nutritional suppliment,nucleoside,purine,guanine,,,Purine Metabolism,,,,,,,,,,,	0.0983899	0.274104	0.0990082	0.179443	0.360696	0.0173425	0.83074	0.965605	0.942203	0.893841	0.945659	0.848661
PM05	C12	2'-Deoxyinosine	Nutritional suppliment,nucleoside,purine,hypoxanthine,,,Purine Metabolism,,,,,,,,,,,	0.00348542	0.710857	0.817791	0.0453849	0.204312	0.0779561	0.78733	0.977392	0.985741	0.844434	0.962231	0.863569
PM05	E12	2'-Deoxyuridine	Nutritional suppliment,nucleoside,pyrimidine,uracil,,,Pyrimidine Metabolism,,,,,,,,,,,	0.129693	0.96159	0.367815	0.0538417	0.399646	0.138363	0.816497	1.00198	0.956605	0.848484	0.951157	0.899496
PM02	E06	2-Hydroxybenzoic acid	C-Source,carboxylate,aromatic,,,,-,-,-,-,-,-,-,-,-,-,-,-	0.241035	0.446581	0.384113	0.234116	0.0169972	0.289358	0.881942	1.07796	0.844515	0.7995	0.593696	0.92644
PM17	B01	2-Hydroxybenzoic acid	anti-capsule, biofilm inhibition, mar inducer	0.0045776	0.688119	0.490848	0.000595534	0.0110722	0.0212957	0.756408	0.97986	0.980112	0.691225	0.889519	0.962448
PM17	B02	2-Hydroxybenzoic acid	anti-capsule, biofilm inhibition, mar inducer	0.0045776	0.688119	0.490848	0.000595534	0.0110722	0.0212957	0.756408	0.97986	0.980112	0.691225	0.889519	0.962448
PM17	B03	2-Hydroxybenzoic acid	anti-capsule, biofilm inhibition, mar inducer	0.0045776	0.688119	0.490848	0.000595534	0.0110722	0.0212957	0.756408	0.97986	0.980112	0.691225	0.889519	0.962448
PM17	B04	2-Hydroxybenzoic acid	anti-capsule, biofilm inhibition, mar inducer	0.0045776	0.688119	0.490848	0.000595534	0.0110722	0.0212957	0.756408	0.97986	0.980112	0.691225	0.889519	0.962448
PM04	H10	2-Hydroxyethane Sulfonic Acid	S-Source,alcohol,2 carbon,,,,-,-,-,-,-,-,-,-,-,-,-,-	0.702429	0.245156	0.538162	0.652896	0.446303	0.911516	0.930351	1.36545	1.1516	0.911688	1.20712	0.976762
PM15	H01	2-Nitroimidazole	ribonucleotide DP reductase	0.154707	0.675647	0.0657187	0.0337736	0.18117	0.101128	0.754716	1.03792	0.911746	0.783894	0.89663	0.938347
PM15	H02	2-Nitroimidazole	ribonucleotide DP reductase	0.154707	0.675647	0.0657187	0.0337736	0.18117	0.101128	0.754716	1.03792	0.911746	0.783894	0.89663	0.938347
PM15	H03	2-Nitroimidazole	ribonucleotide DP reductase	0.154707	0.675647	0.0657187	0.0337736	0.18117	0.101128	0.754716	1.03792	0.911746	0.783894	0.89663	0.938347
PM15	H04	2-Nitroimidazole	ribonucleotide DP reductase	0.154707	0.675647	0.0657187	0.0337736	0.18117	0.101128	0.754716	1.03792	0.911746	0.783894	0.89663	0.938347
PM05	D12	2O-Deoxycytidine	Nutritional suppliment,nucleoside,pyrimidine,cytosine,,,Pyrimidine Metabolism,,,,,,,,,,,	0.00214466	0.900414	0.951518	0.374993	0.0957813	0.10342	0.838951	1.00507	0.996302	0.908906	0.95951	0.871284
PM02	E10	2-Oxovaleric acid	C-Source,carboxylate,3 carbon,,,,Pyruvate metabolism,-,-,-,-,-,-,-,-,-,-,-	0.203777	0.626927	0.190278	0.157231	0.148209	0.365887	0.606638	0.90066	0.651607	0.638228	0.638089	0.806499
PM09	A03	3% NaCl	osmotic sensitivity, NaCl	0.096403	0.768447	0.689466	0.134586	0.416651	0.482278	0.861462	0.983414	0.981038	0.903854	0.952771	0.966891
PM09	D01	3% Potassium Chloride	osmotic sensitivity, KCl	0.106165	0.46471	0.850358	0.270453	0.955995	0.654197	0.885201	1.02915	0.992994	0.905266	1.00216	1.01676
PM09	E03	3% Sodium Formate	osmotic sensitivity, sodium formate	0.0153472	0.715911	0.775857	0.032084	0.190413	0.263327	0.819902	1.01169	0.992757	0.844973	0.914346	1.03437
PM09	F03	3% Sodium Lactate	osmotic sensitivity, sodium lactate	0.337769	0.324764	0.395129	0.689898	0.80963	0.900898	0.328162	1.70612	1.57648	0.740683	1.14711	1.07559
PM09	D06	3% Sodium Sulfate	osmotic sensitivity, Na2SO4	0.00400807	0.695583	0.8898	0.266767	0.337734	0.51941	0.646622	0.989555	0.996467	0.928648	0.962774	0.981188
PM09	E08	3% Urea	osmotic sensitivity, urea	0.000659734	0.13607	0.0123963	0.00488248	0.0526889	0.65031	0.787817	0.979205	0.967314	0.845631	0.945445	0.989225
PM15	F01	3, 4-Dimethoxybenzyl alcohol	oxidizing agent, free radical-peroxidase substrate	0.0413303	0.386525	0.12684	0.0373246	0.107831	0.272489	0.846482	0.964654	0.914093	0.835779	0.899735	0.951925
PM15	F02	3, 4-Dimethoxybenzyl alcohol	oxidizing agent, free radical-peroxidase substrate	0.0413303	0.386525	0.12684	0.0373246	0.107831	0.272489	0.846482	0.964654	0.914093	0.835779	0.899735	0.951925
PM15	F03	3, 4-Dimethoxybenzyl alcohol	oxidizing agent, free radical-peroxidase substrate	0.0413303	0.386525	0.12684	0.0373246	0.107831	0.272489	0.846482	0.964654	0.914093	0.835779	0.899735	0.951925
PM15	F04	3, 4-Dimethoxybenzyl alcohol	oxidizing agent, free radical-peroxidase substrate	0.0413303	0.386525	0.12684	0.0373246	0.107831	0.272489	0.846482	0.964654	0.914093	0.835779	0.899735	0.951925
PM18	G05	3,5- Diamino-1,2,4-triazole (Guanazole)	ribonucleotide DP reductase	0.00281525	0.0141414	0.162366	0.00110463	0.188724	0.127788	0.813908	0.968254	0.964921	0.884161	0.93103	0.962379
PM18	G06	3,5- Diamino-1,2,4-triazole (Guanazole)	ribonucleotide DP reductase	0.00281525	0.0141414	0.162366	0.00110463	0.188724	0.127788	0.813908	0.968254	0.964921	0.884161	0.93103	0.962379
PM18	G07	3,5- Diamino-1,2,4-triazole (Guanazole)	ribonucleotide DP reductase	0.00281525	0.0141414	0.162366	0.00110463	0.188724	0.127788	0.813908	0.968254	0.964921	0.884161	0.93103	0.962379
PM18	G08	3,5- Diamino-1,2,4-triazole (Guanazole)	ribonucleotide DP reductase	0.00281525	0.0141414	0.162366	0.00110463	0.188724	0.127788	0.813908	0.968254	0.964921	0.884161	0.93103	0.962379
PM20	G05	3,5-Dinitrobenzene	respiration, ionophore, H+	0.109496	0.518518	0.0832976	0.0405096	0.329193	0.0666797	0.90619	1.03195	1.11727	0.81636	0.956589	1.10229
PM20	G06	3,5-Dinitrobenzene	respiration, ionophore, H+	0.109496	0.518518	0.0832976	0.0405096	0.329193	0.0666797	0.90619	1.03195	1.11727	0.81636	0.956589	1.10229
PM20	G07	3,5-Dinitrobenzene	respiration, ionophore, H+	0.109496	0.518518	0.0832976	0.0405096	0.329193	0.0666797	0.90619	1.03195	1.11727	0.81636	0.956589	1.10229
PM20	G08	3,5-Dinitrobenzene	respiration, ionophore, H+	0.109496	0.518518	0.0832976	0.0405096	0.329193	0.0666797	0.90619	1.03195	1.11727	0.81636	0.956589	1.10229
PM02	B12	3-0-b-D-Galactopyranosyl-D-Arabinose	C-Source,carbohydrate,disaccharide,galactose,arabinose,,Galactose Metabolism,-,-,-,-,-,-,-,-,-,-,-	0.0109268	0.0316835	0.0418659	0.0856283	0.0183749	0.448737	0.768766	0.827638	0.783678	0.915401	0.746965	0.977405
PM02	H12	3-Hydroxy 2-Butanone	C-Source,alcohol,4 carbon,,,,Pyruvate metabolism,-,-,-,-,-,-,-,-,-,-,-	0.151456	0.480016	0.441885	0.988105	0.196787	0.683259	0.707619	0.890369	0.86728	1.00257	0.777099	0.9365
PM02	C08	3-Methylglucose	C-Source,carbohydrate,hexose,glucose,,,Glycolosis,glucose,-,-,-,-,-,-,-,-,-,-	0.11544	0.253364	0.678816	0.860766	0.175546	0.815145	0.595343	1.22622	1.10188	1.0404	0.744832	0.953357
PM09	A04	4% NaCl	osmotic sensitivity, NaCl	0.0252386	0.288846	0.0475675	0.0437634	0.0206354	0.0166038	0.851688	0.972747	0.936401	0.860642	0.921713	0.897561
PM09	D02	4% Potassium Chloride	osmotic sensitivity, KCl	0.0206193	0.0563776	0.0584159	0.0742701	0.688289	0.345732	0.851164	1.02467	1.02041	0.911289	0.989208	0.991688
PM09	E04	4% Sodium Formate	osmotic sensitivity, sodium formate	0.347138	0.227406	0.989034	0.0104115	9.43887e-05	0.976115	0.906855	0.984532	0.999673	0.812639	0.881264	0.998826
PM09	F04	4% Sodium Lactate	osmotic sensitivity, sodium lactate	0.430411	0.00148854	0.00140208	0.084347	0.0305049	0.285802	0.624338	1.6776	1.69963	0.665209	1.23692	1.12724
PM09	D07	4% Sodium Sulfate	osmotic sensitivity, Na2SO4	0.154571	0.177121	0.304464	0.160291	0.879153	0.954044	0.785309	1.05471	1.04504	0.925995	1.00448	1.00217
PM09	E09	4% Urea	osmotic sensitivity, urea	0.0126396	0.795687	0.326017	0.0135722	0.0837435	0.140994	0.827777	0.993649	0.983528	0.771299	0.955571	0.975042
PM09	H03	40mM Sodium Nitrate	toxicity, nitrate	0.161663	0.220862	0.0373662	0.0135756	0.157392	0.734458	0.952587	0.976156	0.920579	0.85255	0.91356	1.00686
PM09	H09	40mM Sodium Nitrite	toxicity, nitrite	0.01333	0.516762	0.599493	0.0566393	0.144656	0.948166	0.800305	0.98288	1.01116	0.872687	0.960412	1.00189
PM17	C01	4-Aminopyridine	channel blocker, K+	0.042526	0.748509	0.393401	0.132721	0.330087	0.261187	0.871388	0.98857	0.975251	0.907849	0.952188	0.965
PM17	C02	4-Aminopyridine	channel blocker, K+	0.042526	0.748509	0.393401	0.132721	0.330087	0.261187	0.871388	0.98857	0.975251	0.907849	0.952188	0.965
PM17	C03	4-Aminopyridine	channel blocker, K+	0.042526	0.748509	0.393401	0.132721	0.330087	0.261187	0.871388	0.98857	0.975251	0.907849	0.952188	0.965
PM17	C04	4-Aminopyridine	channel blocker, K+	0.042526	0.748509	0.393401	0.132721	0.330087	0.261187	0.871388	0.98857	0.975251	0.907849	0.952188	0.965
PM02	E07	4-Hydroxybenzoic Acid	C-Source,carboxylate,aromatic,,,,TCA,Citrate,acetyl CoA,phenylalanine metabolism,-,-,-,-,-,-,-,-	0.208668	0.488557	0.360698	0.729231	0.0878244	0.418158	0.609267	0.900553	0.854199	0.931184	0.582554	0.888171
PM20	F01	4-Hydroxycoumarin	DNA intercalator	0.00610938	0.595656	0.258132	0.00785096	0.03653	0.616808	0.866393	1.01028	0.977298	0.88178	0.936086	0.990626
PM20	F02	4-Hydroxycoumarin	DNA intercalator	0.00610938	0.595656	0.258132	0.00785096	0.03653	0.616808	0.866393	1.01028	0.977298	0.88178	0.936086	0.990626
PM20	F03	4-Hydroxycoumarin	DNA intercalator	0.00610938	0.595656	0.258132	0.00785096	0.03653	0.616808	0.866393	1.01028	0.977298	0.88178	0.936086	0.990626
PM20	F04	4-Hydroxycoumarin	DNA intercalator	0.00610938	0.595656	0.258132	0.00785096	0.03653	0.616808	0.866393	1.01028	0.977298	0.88178	0.936086	0.990626
PM09	D09	5% Ethylene Glycol	osmotic sensitivity, ethylene glycol	0.00114985	0.23761	0.278242	0.213347	0.263573	0.972241	0.607061	1.02437	1.02687	0.96417	0.980204	1.00116
PM09	A05	5% NaCl	osmotic sensitivity, NaCl	0.0084474	0.72307	0.209708	0.0333169	0.153191	0.0246058	0.868405	0.991923	0.942775	0.892194	0.932259	0.956489
PM09	D03	5% Potassium Chloride	osmotic sensitivity, KCl	0.0507832	0.0812885	0.85641	0.101568	0.287893	0.29433	0.795184	0.940469	0.995645	0.85791	0.947389	0.930735
PM09	E05	5% Sodium Formate	osmotic sensitivity, sodium formate	0.216449	0.589711	0.607257	0.00080086	0.0240102	0.0510941	0.932051	1.00579	0.995245	0.767792	0.926158	0.954308
PM09	F05	5% Sodium Lactate	osmotic sensitivity, sodium lactate	0.376205	0.0567806	0.0528176	0.827809	0.137494	0.305727	0.569227	2.82565	2.58471	0.894003	1.93047	1.50998
PM09	D08	5% Sodium Sulfate	osmotic sensitivity, Na2SO4	0.0893211	0.647906	0.436482	0.0214279	0.291225	0.338671	0.793003	0.99072	1.00859	0.878307	0.959432	0.968419
PM09	E10	5% Urea	osmotic sensitivity, urea	0.0140654	0.310904	0.0799318	0.00902862	0.0323925	0.0158845	0.815333	0.965972	0.950893	0.596136	0.930093	0.899002
PM15	B09	5,7-Dichloro-8-hydroxy-quinaldine	chelator, lipophilic	0.443627	0.34572	0.21474	0.0050388	0.359936	0.921551	0.948553	0.871311	0.811572	0.590811	0.839189	1.01232
PM15	B10	5,7-Dichloro-8-hydroxy-quinaldine	chelator, lipophilic	0.443627	0.34572	0.21474	0.0050388	0.359936	0.921551	0.948553	0.871311	0.811572	0.590811	0.839189	1.01232
PM15	B11	5,7-Dichloro-8-hydroxy-quinaldine	chelator, lipophilic	0.443627	0.34572	0.21474	0.0050388	0.359936	0.921551	0.948553	0.871311	0.811572	0.590811	0.839189	1.01232
PM15	B12	5,7-Dichloro-8-hydroxy-quinaldine	chelator, lipophilic	0.443627	0.34572	0.21474	0.0050388	0.359936	0.921551	0.948553	0.871311	0.811572	0.590811	0.839189	1.01232
PM15	C01	5,7-Dichloro-8-hydroxyquinoline	chelator, lipophilic	0.0060527	0.21982	0.210576	0.0351278	0.171812	0.305198	0.777741	0.983135	0.966276	0.821976	0.926793	0.973547
PM15	C02	5,7-Dichloro-8-hydroxyquinoline	chelator, lipophilic	0.0060527	0.21982	0.210576	0.0351278	0.171812	0.305198	0.777741	0.983135	0.966276	0.821976	0.926793	0.973547
PM15	C03	5,7-Dichloro-8-hydroxyquinoline	chelator, lipophilic	0.0060527	0.21982	0.210576	0.0351278	0.171812	0.305198	0.777741	0.983135	0.966276	0.821976	0.926793	0.973547
PM15	C04	5,7-Dichloro-8-hydroxyquinoline	chelator, lipophilic	0.0060527	0.21982	0.210576	0.0351278	0.171812	0.305198	0.777741	0.983135	0.966276	0.821976	0.926793	0.973547
PM09	A06	5.5% NaCl	osmotic sensitivity, NaCl	0.0236126	0.537746	0.543554	0.0167663	0.0274567	0.0464756	0.87071	0.987425	0.961016	0.834875	0.892927	0.903629
PM09	G11	50mM Ammonium Sulfate pH 8	toxicity, ammonia	0.0629751	0.877791	0.752233	0.30416	0.937315	0.840159	0.811497	0.990957	1.01764	0.93733	0.996044	0.989322
PM09	G06	50mM Sodium Benzoate pH 5.2	toxicity, benzoate	0.232316	0.00725469	0.0156379	0.148717	0.027443	0.874684	0.879895	1.26326	1.292	0.789326	1.17194	1.00733
PM09	G02	50mM Sodium Phosphate pH 7	toxicity, phosphate	0.0221874	0.959314	0.972754	0.14912	0.339658	0.158236	0.744052	1.00109	0.999063	0.958329	0.980025	0.961626
PM16	E05	5-Azacytidine	DNA methylation, methyltransferase inhibitor	0.0108614	0.734357	0.13539	0.0364156	0.192323	0.169422	0.844776	0.995147	0.971725	0.848665	0.95554	0.982188
PM16	E06	5-Azacytidine	DNA methylation, methyltransferase inhibitor	0.0108614	0.734357	0.13539	0.0364156	0.192323	0.169422	0.844776	0.995147	0.971725	0.848665	0.95554	0.982188
PM16	E07	5-Azacytidine	DNA methylation, methyltransferase inhibitor	0.0108614	0.734357	0.13539	0.0364156	0.192323	0.169422	0.844776	0.995147	0.971725	0.848665	0.95554	0.982188
PM16	E08	5-Azacytidine	DNA methylation, methyltransferase inhibitor	0.0108614	0.734357	0.13539	0.0364156	0.192323	0.169422	0.844776	0.995147	0.971725	0.848665	0.95554	0.982188
PM16	A09	5-Chloro-7-iodo-8-hydroxyquinoline	chelator, lipophilic	0.0160919	0.146557	0.467853	0.00816402	0.444422	0.21268	0.869034	0.98409	0.991728	0.729909	0.988654	0.980524
PM16	A10	5-Chloro-7-iodo-8-hydroxyquinoline	chelator, lipophilic	0.0160919	0.146557	0.467853	0.00816402	0.444422	0.21268	0.869034	0.98409	0.991728	0.729909	0.988654	0.980524
PM16	A11	5-Chloro-7-iodo-8-hydroxyquinoline	chelator, lipophilic	0.0160919	0.146557	0.467853	0.00816402	0.444422	0.21268	0.869034	0.98409	0.991728	0.729909	0.988654	0.980524
PM16	A12	5-Chloro-7-iodo-8-hydroxyquinoline	chelator, lipophilic	0.0160919	0.146557	0.467853	0.00816402	0.444422	0.21268	0.869034	0.98409	0.991728	0.729909	0.988654	0.980524
PM18	H01	5-Fluoro-5'-deoxyuridine	pyrimidine antimetabolite: inhibits nucleic acid replication	0.00733383	0.0352021	0.0164329	0.00732098	0.305893	0.234376	0.871545	0.956987	0.946702	0.92182	0.965498	0.907563
PM18	H02	5-Fluoro-5'-deoxyuridine	pyrimidine antimetabolite: inhibits nucleic acid replication	0.00733383	0.0352021	0.0164329	0.00732098	0.305893	0.234376	0.871545	0.956987	0.946702	0.92182	0.965498	0.907563
PM18	H03	5-Fluoro-5'-deoxyuridine	pyrimidine antimetabolite: inhibits nucleic acid replication	0.00733383	0.0352021	0.0164329	0.00732098	0.305893	0.234376	0.871545	0.956987	0.946702	0.92182	0.965498	0.907563
PM18	H04	5-Fluoro-5'-deoxyuridine	pyrimidine antimetabolite: inhibits nucleic acid replication	0.00733383	0.0352021	0.0164329	0.00732098	0.305893	0.234376	0.871545	0.956987	0.946702	0.92182	0.965498	0.907563
PM12	F09	5-Fluoroorotic acid	nucleic acid analog, pyrimidine	0.0227661	0.606171	0.379009	0.0422884	0.108548	0.464419	0.857413	0.985687	0.969976	0.887768	0.941556	0.978321
PM12	F10	5-Fluoroorotic acid	nucleic acid analog, pyrimidine	0.0227661	0.606171	0.379009	0.0422884	0.108548	0.464419	0.857413	0.985687	0.969976	0.887768	0.941556	0.978321
PM12	F11	5-Fluoroorotic acid	nucleic acid analog, pyrimidine	0.0227661	0.606171	0.379009	0.0422884	0.108548	0.464419	0.857413	0.985687	0.969976	0.887768	0.941556	0.978321
PM12	F12	5-Fluoroorotic acid	nucleic acid analog, pyrimidine	0.0227661	0.606171	0.379009	0.0422884	0.108548	0.464419	0.857413	0.985687	0.969976	0.887768	0.941556	0.978321
PM13	D05	5-Fluorouracil	nucleic acid analog, pyrimidine	0.00945859	0.609387	0.0785497	0.00290074	0.130498	0.154912	0.797756	0.992216	0.973418	0.858044	0.939389	0.969864
PM13	D06	5-Fluorouracil	nucleic acid analog, pyrimidine	0.00945859	0.609387	0.0785497	0.00290074	0.130498	0.154912	0.797756	0.992216	0.973418	0.858044	0.939389	0.969864
PM13	D07	5-Fluorouracil	nucleic acid analog, pyrimidine	0.00945859	0.609387	0.0785497	0.00290074	0.130498	0.154912	0.797756	0.992216	0.973418	0.858044	0.939389	0.969864
PM13	D08	5-Fluorouracil	nucleic acid analog, pyrimidine	0.00945859	0.609387	0.0785497	0.00290074	0.130498	0.154912	0.797756	0.992216	0.973418	0.858044	0.939389	0.969864
PM02	E12	5-Keto-D-Gluconic Acid	C-Source,carbohydrate,hexose,glucose,acid,,Glycolosis,glucose,-,-,-,-,-,-,-,-,-,-	0.790998	0.457403	0.634221	0.450321	0.238486	0.330851	0.990392	1.04313	0.969166	0.944912	0.941538	0.950046
PM09	A07	6% NaCl	osmotic sensitivity, NaCl	0.123596	0.742028	0.376151	0.158411	0.0500025	0.104308	0.889699	0.989165	0.974146	0.854588	0.902231	0.917021
PM09	B01	6% NaCl	osmotic sensitivity, NaCl control	0.0594151	0.818965	0.588235	0.0857966	0.172364	0.460954	0.900561	1.00812	0.986236	0.921977	0.930199	0.979351
PM09	C04	6% NaCl + ?-Glutamic acid	osmolyte, b-glutamate	0.113456	0.667918	0.0958585	0.705969	0.549856	0.549975	0.909705	1.02485	1.05833	0.984663	0.943645	1.01519
PM09	C05	6% NaCl + Amino-N-butyric acid	osmolyte, g-amino butyric acid	0.0237711	0.461292	0.382511	0.0340041	0.228191	0.0503113	0.859223	1.00772	0.9922	0.918881	0.951995	0.971717
PM09	B02	6% NaCl + Betaine	osmolyte, betaine	0.117322	0.468721	0.708294	0.160072	0.729702	0.678811	0.894626	1.0332	1.01598	0.881079	0.982163	0.97105
PM09	B08	6% NaCl + Choline	osmolyte, choline	0.148514	0.739325	0.974329	0.278039	0.539261	0.959353	0.838305	1.01127	1.00084	0.952803	0.971852	1.00183
PM09	B10	6% NaCl + Creatine	osmolyte, creatine	0.00488072	0.232623	0.188076	0.0666092	0.352358	0.816422	0.893758	0.991379	0.986271	0.940214	0.959704	0.994291
PM09	B11	6% NaCl + Creatinine	osmolyte, creatinine	0.0398409	0.635652	0.489176	0.25526	0.361914	0.685769	0.835189	0.972011	0.965677	0.925307	0.931686	0.971296
PM09	B05	6% NaCl + Dimethyl sulphonyl propionate	osmolyte, dimethyl sulphonyl propionate	0.0216837	0.342715	0.655942	0.0109586	0.260964	0.460396	0.861939	1.01915	0.99025	0.884755	0.923539	0.96745
PM09	B07	6% NaCl + Ectoine	osmolyte, ectoine	0.0519241	0.925085	0.538245	0.0815806	0.154001	0.123908	0.886358	1.00197	0.98658	0.913533	0.944843	0.952936
PM09	C06	6% NaCl + Glutathione	osmolyte, glutathione	0.084964	0.110452	0.150421	0.870431	0.719445	0.298142	0.93408	1.06074	1.04505	0.994955	1.01068	1.04764
PM09	C07	6% NaCl + Glycerol	osmolyte, glycerol	0.153094	0.617326	0.626883	0.483874	0.466431	0.474673	0.874839	0.968432	1.03086	0.952162	0.941971	1.0495
PM09	C01	6% NaCl + KCl	osmolyte, KCl	0.0597498	0.941035	0.551683	0.0323035	0.325425	0.256894	0.90654	1.00102	0.990941	0.927405	0.960205	0.940735
PM09	B12	6% NaCl + L-Carnitine	osmolyte, carnitine	0.0897216	0.989394	0.717804	0.127125	0.11839	0.808531	0.904485	0.99959	0.991987	0.93805	0.917649	0.987448
PM09	C02	6% NaCl + L-Proline	osmolyte, proline	0.109823	0.189325	0.221171	0.173002	0.251339	0.639207	0.880485	0.937285	0.963236	0.901462	0.93846	0.978937
PM09	B06	6% NaCl + MOPS	osmolyte, MOPS	0.0398384	0.912651	0.0182598	0.00471572	0.0472742	0.0133433	0.829699	1.00053	0.954671	0.932423	0.950339	0.963412
PM09	C03	6% NaCl + N-Acetyl-L-glutamine	osmolyte, acetyl glutamine	0.0531373	0.863937	0.704918	0.122964	0.268805	0.317187	0.868795	1.0046	0.990143	0.921102	0.942481	0.949853
PM09	B03	6% NaCl + N-N Dimethyl glycine	osmolyte, dimethylglycine	0.0685898	0.894071	0.310287	0.0211609	0.167632	0.65867	0.860853	1.00288	0.982093	0.902289	0.940647	0.980572
PM09	C11	6% NaCl + Octopine	osmolyte, octopine	0.0676346	0.93652	0.867034	0.40946	0.435523	0.972658	0.835287	0.994467	0.98843	0.917478	0.943506	0.997011
PM09	B09	6% NaCl + Phosphorylcholine	osmolyte, phosphorylcholine	0.0103026	0.414435	0.362896	0.0464562	0.132882	0.3986	0.858505	0.981642	0.977062	0.933218	0.95236	0.968075
PM09	B04	6% NaCl + Sarcosine	osmolyte, sarcosine	0.0160325	0.586101	0.231786	0.075241	0.198228	0.421767	0.831255	0.980269	0.955073	0.929389	0.943291	0.963376
PM09	C08	6% NaCl + Trehalose	osmolyte, trehalose	0.105981	0.620312	0.235536	0.43251	0.542456	0.235549	0.880252	1.02338	1.05113	0.949894	0.949502	1.05715
PM09	C12	6% NaCl + Trigonelline	osmolyte, trigonelline	0.0799883	0.39703	0.398915	0.0205832	0.151427	0.822665	0.898051	1.01653	0.989341	0.930692	0.924518	1.0059
PM09	C10	6% NaCl + Trimethylamine	osmolyte, trimethylamine	0.0741737	0.250667	0.540931	0.135327	0.156557	0.564648	0.874327	0.942186	0.985187	0.927854	0.932454	0.979157
PM09	C09	6% NaCl + Trimethylamine-N-oxide	osmolyte, trimethylamine-N-oxide	0.120046	0.858902	0.847949	0.286919	0.447987	0.661664	0.891026	0.993262	1.00762	0.958135	0.97423	1.02414
PM09	D04	6% Potassium Chloride	osmotic sensitivity, KCl	0.046883	0.271502	0.0617447	0.0385977	0.00887249	0.503396	0.844902	1.01922	0.959955	0.887751	0.903311	0.980953
PM09	E06	6% Sodium Formate	osmotic sensitivity, sodium formate	0.212386	0.589545	0.44222	0.0563463	0.0523918	0.533067	0.821294	0.967724	0.950532	0.713365	0.7923	0.96263
PM09	G07	100mM Sodium Benzoate pH 5.2	toxicity, benzoate	0.452568	0.00054239	0.000487964	0.346812	0.000949631	0.00656833	1.36617	3.25147	3.37412	1.11961	2.79164	1.78254
PM09	E11	6% Urea	osmotic sensitivity, urea	0.0360634	0.485971	0.478886	0.00794043	0.223296	0.0559911	0.780776	1.03104	0.972155	0.413723	0.945104	0.872584
PM09	A08	6.5% NaCl	osmotic sensitivity, NaCl	0.0770252	0.796322	0.712159	0.178641	0.369179	0.807377	0.872102	0.983648	1.01564	0.927925	0.957124	0.987705
PM09	H04	60mM Sodium Nitrate	toxicity, nitrate	0.323818	0.413791	0.0831641	0.0353062	0.205055	0.243766	0.960132	0.990194	0.969009	0.90771	0.938422	1.02316
PM09	H10	60mM Sodium Nitrite	toxicity, nitrite	0.0276001	0.634	0.790549	0.041709	0.0190202	0.79334	0.769854	0.979038	0.993245	0.739796	0.897567	0.990172
PM13	C01	6-Mercaptopurine	nucleic acid analog, purine	0.0104668	0.647181	0.662302	0.00796449	0.748729	0.592501	0.84756	1.00596	1.00555	0.83801	0.987669	0.98849
PM13	C02	6-Mercaptopurine	nucleic acid analog, purine	0.0104668	0.647181	0.662302	0.00796449	0.748729	0.592501	0.84756	1.00596	1.00555	0.83801	0.987669	0.98849
PM13	C03	6-Mercaptopurine	nucleic acid analog, purine	0.0104668	0.647181	0.662302	0.00796449	0.748729	0.592501	0.84756	1.00596	1.00555	0.83801	0.987669	0.98849
PM13	C04	6-Mercaptopurine	nucleic acid analog, purine	0.0104668	0.647181	0.662302	0.00796449	0.748729	0.592501	0.84756	1.00596	1.00555	0.83801	0.987669	0.98849
PM04	C07	6-Phospho-Gluconic Acid	P-Source,carbohydrate,hexose,glucose,phosphate,,Glycolosis,glucose,-,-,-,-,-,-,-,-,-,-	0.332165	0.0506859	0.989515	0.0245133	0.412907	0.143604	0.805789	1.33536	1.00123	0.576769	1.07997	0.840832
PM09	A09	7% NaCl	osmotic sensitivity, NaCl	0.365097	0.253636	0.801431	0.216879	0.594271	0.419576	0.92	0.886864	0.973294	0.875016	0.956947	0.931167
PM09	F07	7% Sodium Lactate	osmotic sensitivity, sodium lactate	0.235992	0.0385943	0.000924978	0.618934	0.288758	0.0501464	0.810448	2.87326	3.61249	0.870701	1.58189	1.68929
PM09	E12	7% Urea	osmotic sensitivity, urea	0.0038534	0.012774	0.00280804	0.000233213	0.000317091	0.00840037	0.633785	0.964453	0.915793	0.269064	0.895436	0.780667
PM09	A10	8% NaCl	osmotic sensitivity, NaCl	0.0855224	0.505551	0.306535	0.0846856	0.151431	0.101866	0.808093	0.969161	0.940352	0.776365	0.86396	0.847562
PM09	F11	11% Sodium Lactate	osmotic sensitivity, sodium lactate	0.0285983	0.020369	0.00985607	0.00143353	0.000437292	0.0127814	0.889964	3.98718	3.61284	1.39357	2.89615	2.70112
PM09	H05	80mM Sodium Nitrate	toxicity, nitrate	0.20583	0.73759	0.186539	0.0938835	0.350338	0.456728	0.94324	0.992973	0.963514	0.865581	0.951858	1.01602
PM09	H11	80mM Sodium Nitrite	toxicity, nitrite	0.0896264	0.536346	0.978137	0.0224367	0.113597	0.881735	0.791414	1.02294	0.999017	0.792701	0.899984	1.00923
PM20	G09	8-Hydroxyquinoline	chelator, lipophilic, RNA synthesis	0.387756	0.375505	0.536451	0.580115	0.415833	0.70272	1.17371	1.21429	1.11091	0.83601	1.35208	1.06683
PM20	G10	8-Hydroxyquinoline	chelator, lipophilic, RNA synthesis	0.387756	0.375505	0.536451	0.580115	0.415833	0.70272	1.17371	1.21429	1.11091	0.83601	1.35208	1.06683
PM20	G11	8-Hydroxyquinoline	chelator, lipophilic, RNA synthesis	0.387756	0.375505	0.536451	0.580115	0.415833	0.70272	1.17371	1.21429	1.11091	0.83601	1.35208	1.06683
PM20	G12	8-Hydroxyquinoline	chelator, lipophilic, RNA synthesis	0.387756	0.375505	0.536451	0.580115	0.415833	0.70272	1.17371	1.21429	1.11091	0.83601	1.35208	1.06683
PM09	A11	9% NaCl	osmotic sensitivity, NaCl	0.161042	0.0214625	0.00215047	0.00270916	0.010932	0.273841	0.842408	0.951474	0.925983	0.857648	0.83382	0.927567
PM09	G08	200mM Sodium Benzoate pH 5.2	toxicity, benzoate	0.634714	0.00954941	0.00506435	0.61352	0.00606815	0.873181	1.15033	2.69289	2.71588	0.916829	2.39562	1.02758
PM14	B01	9-Aminoacridine	DNA intercalator	0.110756	0.398905	0.949292	0.00553143	0.725475	0.47868	0.879897	1.01973	0.998636	0.742988	0.985226	0.903458
PM14	B02	9-Aminoacridine	DNA intercalator	0.110756	0.398905	0.949292	0.00553143	0.725475	0.47868	0.879897	1.01973	0.998636	0.742988	0.985226	0.903458
PM14	B03	9-Aminoacridine	DNA intercalator	0.110756	0.398905	0.949292	0.00553143	0.725475	0.47868	0.879897	1.01973	0.998636	0.742988	0.985226	0.903458
PM14	B04	9-Aminoacridine	DNA intercalator	0.110756	0.398905	0.949292	0.00553143	0.725475	0.47868	0.879897	1.01973	0.998636	0.742988	0.985226	0.903458
PM03	G12	a-Amino-N-Valeric Acid	N-Source,amino acid,5 carbon,Leu,AA,,TCA,Citrate,acetyl CoA,Leu,-,-,-,-,-,-,-,-	0.0873605	0.933204	0.100833	0.0844178	0.196222	0.509284	0.746381	0.992842	0.811025	0.732996	0.838925	0.929645
PM02	G01	Acetamide	C-Source,amide,2 carbon,,,,-,-,-,-,-,-,-,-,-,-,-,-	0.0552649	0.985107	0.482801	0.917948	0.23458	0.517758	0.589723	0.997656	0.904217	0.982678	0.801938	0.90569
PM03	E04	Acetamide	N-Source,amide,2 carbon,,,,-,-,-,-,-,-,-,-,-,-,-,-	0.116872	0.594811	0.178309	0.0623338	0.663138	0.309735	0.692966	0.924418	0.762901	0.567868	0.933421	0.80108
PM01	C08	Acetic Acid	C-Source,carboxylate,2 carbon,,,,Pyruvate metabolism,-,-,-,-,-,-,-,-,-,-,-	0.016264	0.229867	0.0222945	0.051785	0.0239734	0.0325379	0.421666	1.10319	0.628566	0.723103	0.608906	0.718517
PM01	G07	Acetoacetic Acid	C-Source,carboxylate,4 carbon,,,,Pyruvate metabolism,-,-,-,-,-,-,-,-,-,-,-	0.0454582	0.373521	0.0319901	0.0830081	0.0171133	0.106131	0.504026	0.939479	0.710569	0.742253	0.628984	0.748678
PM14	A01	Acriflavine	DNA intercalator	0.0754186	0.644358	0.513465	0.038915	0.228215	0.237348	0.871804	0.979089	0.963775	0.718425	0.934795	0.941581
PM14	A02	Acriflavine	DNA intercalator	0.0754186	0.644358	0.513465	0.038915	0.228215	0.237348	0.871804	0.979089	0.963775	0.718425	0.934795	0.941581
PM14	A03	Acriflavine	DNA intercalator	0.0754186	0.644358	0.513465	0.038915	0.228215	0.237348	0.871804	0.979089	0.963775	0.718425	0.934795	0.941581
PM14	A04	Acriflavine	DNA intercalator	0.0754186	0.644358	0.513465	0.038915	0.228215	0.237348	0.871804	0.979089	0.963775	0.718425	0.934795	0.941581
PM02	A03	a-Cyclodextrin	C-Source,carbohydrate,oligosaccharide,maltose,,,-,-,-,-,-,-,-,-,-,-,-,-	0.0606115	0.805151	0.62994	0.491602	0.23577	0.543702	0.618972	1.01643	1.0376	0.950452	0.802435	1.06417
PM03	F02	Adenine	N-Source,nucleic acid,purine,adenine,,,Purine Metabolism,-,-,-,-,-,-,-,-,-,-,-	0.132933	0.243637	0.185426	0.317298	0.500999	0.0730331	0.810976	1.17308	0.907429	0.894152	0.904813	0.789317
PM05	A10	Adenine	Nutritional suppliment,nucleic acid,purine,adenine,,,Purine Metabolism,-,-,-,-,-,-,-,-,-,-,-	0.3767	0.993753	0.804353	0.433785	0.989649	0.281067	0.796722	1.00114	1.03733	0.893996	0.997428	0.79741
PM01	E12	Adenosine	C-Source,nucleoside,purine,adenine,,,Purine Metabolism,-,-,-,-,-,-,-,-,-,-,-	0.0411868	0.0375887	0.0557743	0.130064	0.902541	0.0778328	0.700323	1.35334	0.737146	1.18471	1.0256	0.791465
PM03	F03	Adenosine	N-Source,nucleoside,purine,adenine,,,Purine Metabolism,-,-,-,-,-,-,-,-,-,-,-	0.467777	0.502984	0.406223	0.171735	0.847124	0.331127	0.809941	1.20173	0.844951	0.567895	0.951294	0.759637
PM05	A11	Adenosine	Nutritional suppliment,nucleoside,purine,adenine,,,Purine Metabolism,-,-,-,-,-,-,-,-,-,-,-	0.441655	0.759269	0.718018	0.379558	0.89231	0.208922	0.84451	0.960722	1.04568	0.866047	1.02226	0.803655
PM04	A11	Adenosine 2',3'-Cyclic Monophosphate	P-Source,nucleotide,purine,adenine,Phosphate,,Purine Metabolism,-,-,-,-,-,-,-,-,-,-,-	0.791937	0.00198508	0.249116	0.419958	0.00748981	0.49972	0.969904	1.2972	1.14638	1.05249	1.23771	1.02728
PM04	A08	Adenosine 2'-Monophosphate	P-Source,nucleotide,purine,adenine,Phosphate,,Purine Metabolism,-,-,-,-,-,-,-,-,-,-,-	0.866349	0.0237813	0.290058	0.292573	0.0518465	0.926392	1.02373	1.32487	1.14733	0.913883	1.19188	0.993486
PM04	A12	Adenosine 3',5'-Cyclic Monophosphate	P-Source,nucleotide,purine,adenine,Phosphate,,Purine Metabolism,-,-,-,-,-,-,-,-,-,-,-	0.232758	0.109619	0.579114	0.0678662	0.890425	0.203614	0.885881	1.22188	0.910479	0.750104	1.00874	0.888869
PM05	A09	Adenosine 3',5'-Cyclic Monophosphate	Nutritional suppliment,nucleotide,purine,adenine,Phosphate,,Purine Metabolism,-,-,-,-,-,-,-,-,-,-,-	0.315042	0.893721	0.697155	0.335301	0.966515	0.217863	0.803992	1.01453	1.04551	0.88525	0.993504	0.828732
PM04	A09	Adenosine 3'-Monophosphate	P-Source,nucleotide,purine,adenine,Phosphate,,Purine Metabolism,-,-,-,-,-,-,-,-,-,-,-	0.486336	0.0155534	0.258422	0.0230916	0.0596245	0.728425	0.933207	1.29797	1.11803	0.905821	1.1632	0.984298
PM04	A10	Adenosine 5'-Monophosphate	P-Source,nucleotide,purine,adenine,Phosphate,,Purine Metabolism,-,-,-,-,-,-,-,-,-,-,-	0.590348	0.122757	0.892539	0.74641	0.191581	0.405823	1.20434	1.73161	1.08868	1.10769	1.54887	1.3118
PM01	C09	a-D-Glucose	C-Source,carbohydrate,hexose,glucose,,,Glycolosis,glucose,-,-,-,-,-,-,-,-,-,-	0.118379	0.076305	0.195797	0.142242	0.0101282	0.061935	1.02617	1.20078	0.946154	0.881876	1.04426	0.890142
PM05	F08	a-D-Glucose	Nutritional suppliment,carbohydrate,hexose,glucose,,,Glycolosis,glucose,-,-,-,-,-,-,-,-,-,-	0.0262419	0.725604	0.92383	0.0553422	0.301007	0.0484628	0.685852	1.03105	1.00908	0.624138	0.924352	0.773695
PM01	D09	a-D-Lactose	C-Source,carbohydrate,disaccharide,galactose,glucose,,Glycolosis,glucose,Galactose Metabolism,-,-,-	0.076351	0.14352	0.0461562	0.514341	0.0268196	0.0443257	0.622079	1.26167	0.667489	1.08863	0.745294	0.73318
PM01	E09	Adonitol	C-Source,carbohydrate,pentose,ribose,,,Pentose and glucuronate interconversions,-,-,-,-,-,-,-,-,-,-	0.0655125	0.154053	0.0675488	0.470173	0.0885943	0.139267	0.555486	1.22956	0.652729	1.1109	0.700497	0.761363
[truncated: 1,678 more rows]

## Sheet: Detrick
				P-value			Strain
plate	well	pheno	mode	27C-pv	27D-pv	52-pv	Detrick-1	Detrick-2	Detrick-3
[truncated: 16 more rows]

## Sheet: 1013-2
					Fold change
[truncated: 173 more rows]

[truncated: 2 more sheets: 1013-1, Dugway]
