# Supplementary material for: Genomic Signatures of Strain Selection and Enhancement in Bacillus atrophaeus var. globigii, a Historical Biowarfare Simulant
Source: PLoS One. 2011 Mar 25;6(3):e17836. doi: 10.1371/journal.pone.0017836 (PMC3064580; doi:10.1371/journal.pone.0017836)
Supplement: Table S5 — contains HCDiffs calls from templated assembly of ATCC 49822 variants using the finished sequence of the 1942 isolate. (XLSX) [file pone.0017836.s006.xlsx]

## Sheet: Filtered & Sorted
Table S5: High-confidence mutations in ATCC 49822 lineage relative to 1942 finished sequence
Pos Start	Pos End	Ref nt	Query nt	Depth	% Variant	Query Strain		RAST Annotation
734	734	G	A	27	1	49822-1		Intergenic
734	734	G	A	44	1	49822-2
39905	39905	G	T	46	1	49822-1
39905	39905	G	T	37	1	49822-2
39912	39912	G	T	47	1	49822-1
39912	39912	G	T	39	1	49822-2
45501	45501	C	A	35	0.97	49822-1
45501	45501	C	A	47	0.91	49822-2
61413	61413	C	A	34	0.97	49822-1
61413	61413	C	A	34	1	49822-2
133080	133080	G	A	40	1	49822-1	R56K (546)	Major myo-inositol transporter IolT
133080	133080	G	A	40	1	49822-2
313146	313146	C	T	25	1	49822-1	synonymous	PTS system, trehalose-specific IIB component (EC 2.7.1.69) / PTS system, trehalose-specific IIC component (EC 2.7.1.69)
313146	313146	C	T	42	1	49822-2
452636	452636	G	A	28	1	49822-1	synonymous	Chemotaxis protein methyltransferase CheR (EC 2.1.1.80)
452636	452636	G	A	47	1	49822-2
611822	611822	G	T	28	1	49822-1	synonymous	Exonuclease SbcD
611822	611822	G	T	45	1	49822-2
664239	664239	G	A	26	1	49822-1	A378T (385)	Acetylornithine aminotransferase (EC 2.6.1.11)
664239	664239	G	A	36	1	49822-2
686460	686460	T	G	32	0.97	49822-1	W520G (545)	Oligopeptide ABC transporter, periplasmic oligopeptide-binding protein OppA (TC 3.A.1.5.1)
686460	686460	T	G	36	0.97	49822-2
889607	889607	A	G	38	1	49822-1	Y86C (209)	Methylthioribulose-1-phosphate dehydratase (EC 4.2.1.109)
889607	889607	A	G	44	1	49822-2
903504	903504	C	T	35	1	49822-1		Intergenic
903504	903504	C	T	41	1	49822-2
1050842	1050842	G	A	37	1	49822-1	M338I (364)	UDP-N-acetylglucosamine--N-acetylmuramyl- (pentapeptide) pyrophosphoryl-undecaprenol N-acetylglucosamine transferase (EC 2.4.1.227)
1050842	1050842	G	A	44	1	49822-2
1170114	1170114	C	A	24	1	49822-1		Chemotaxis response regulator protein-glutamate methylesterase CheB (EC 3.1.1.61)
1170114	1170114	C	A	30	1	49822-2
1251549	1251549	C	A	29	1	49822-1		Hydroxymethylglutaryl-CoA synthase (EC 2.3.3.10)
1251549	1251549	C	A	35	1	49822-2
1423599	1423599	T	C	20	0.95	49822-1		Intergenic
1423599	1423599	T	C	40	1	49822-2
1504763	1504764	GA	-	30	0.97	49822-1	Frameshift (244/493)	Glutamate synthase [NADPH] small chain (EC 1.4.1.13)
1506272	1506272	G	A	33	1	49822-1	A1267V (1521)	Glutamate synthase [NADPH] large chain (EC 1.4.1.13)
1506272	1506272	G	A	30	1	49822-2
1713595	1713595	A	G	23	1	49822-1	R32G (496)	Na+/solute symporter
1713595	1713595	A	G	39	1	49822-2
1923767	1923767	C	T	22	1	49822-1		Intergenic
1923767	1923767	C	T	40	1	49822-2
2073603	2073603	A	G	21	0.95	49822-1	K50E (113)	SinR, regulator of post-exponential-phase responses genes (competence and sporulation)
2073603	2073603	A	G	24	0.87	49822-2
2174033	2174033	G	T	25	1	49822-1		Putative toxin component near putative ESAT-related proteins, repetitive / Repetitive hypothetical protein near ESAT cluster, SA0282 homolog
2174033	2174033	G	T	46	1	49822-2
2286042	2286042	C	T	41	1	49822-1	synonymous	Rod shape-determining protein MreC
2286042	2286042	C	T	48	1	49822-2
2479676	2479676	C	T	31	1	49822-1	synonymous	general stress protein
2479676	2479676	C	T	29	1	49822-2
2518047	2518047	T	C	29	0.93	49822-2	D166G (498)	lipoprotein
2565064	2565064	A	G	31	0.94	49822-2		Low G+C gram positive nudix hydrolase YtkD (EC 3.6.-.-)
2602261	2602261	A	C	57	1	49822-1		tRNA-Leu-TAA
2602261	2602261	A	C	56	0.96	49822-2
2771980	2771980	C	A	38	1	49822-1		ABC transporter, ATP-binding protein
2771980	2771980	C	A	30	1	49822-2
2939936	2939936	C	T	29	1	49822-1	D285N (481)	Predicted L-lactate dehydrogenase, Iron-sulfur cluster-binding subunit YkgF
2939936	2939936	C	T	45	0.98	49822-2
2942772	2942781	TTTTGTTTTT	-	30	1	49822-1	Intergenic, homopolymer tract	Lactate-responsive regulator LldR in Firmicutes, GntR family
2942772	2942781	TTTTGTTTTT	-	38	1	49822-2
3052835	3052835	G	T	31	1	49822-1	H310Q (321)	Flagellin protein FlaA
3052835	3052835	G	T	31	1	49822-2
3113349	3113349	C	T	33	1	49822-1	synonymous	Spore germination protein GerKA
3113349	3113349	C	T	37	1	49822-2
3128882	3128882	A	-	23	0.96	49822-1
3143172	3143172	G	A	40	1	49822-1	synonymous	hypothetical protein
3143172	3143172	G	A	36	1	49822-2
3159920	3159920	G	A	40	1	49822-1	synonymous	response regulator aspartate phosphatase
3159920	3159920	G	A	37	1	49822-2
3186184	3186184	C	T	38	1	49822-1	G184R (254)	transcriptional regulator (MerR family)
3186184	3186184	C	T	36	1	49822-2
3188440	3188440	T	G	40	1	49822-1		Intergenic
3188440	3188440	T	G	40	1	49822-2
3243343	3243343	G	A	41	1	49822-1	synonymous	Uncharacterized ABC transporter ATP-binding protein ywjA
3243343	3243343	G	A	41	1	49822-2
3268543	3268543	C	T	32	1	49822-1		Intergenic
3268543	3268543	C	T	36	1	49822-2
3269962	3269962	C	A	34	1	49822-1		Intergenic
3269962	3269962	C	A	29	1	49822-2
3279617	3279617	C	T	43	1	49822-1	R315H (433)	Deoxyguanosinetriphosphate triphosphohydrolase (EC 3.1.5.1)
3279617	3279617	C	T	45	1	49822-2
3308494	3308494	C	T	39	1	49822-1	synonymous	Sucrose-6-phosphate hydrolase (EC 3.2.1.26)
3308494	3308494	C	T	42	1	49822-2
3354410	3354410	C	A	33	0.88	49822-1		Tyrosyl-tRNA synthetase (EC 6.1.1.1) ## cluster 1
3354410	3354410	C	A	39	0.87	49822-2
3436664	3436664	G	A	29	1	49822-1	synonymous	Permease of the drug/metabolite transporter (DMT) superfamily
3436664	3436664	G	A	46	0.96	49822-2
3437350	3437350	T	C	28	1	49822-1	T148A (247)	3-oxoacyl-[acyl-carrier protein] reductase (EC 1.1.1.100)
3437350	3437350	T	C	42	1	49822-2
3447958	3447958	G	A	37	1	49822-1	P231L (416)	hypothetical protein
3447958	3447958	G	A	50	1	49822-2
3456800	3456800	G	A	36	1	49822-1	synonymous	Histidine ammonia-lyase (EC 4.3.1.3)
3456800	3456800	G	A	45	1	49822-2
3475542	3475542	G	T	25	1	49822-2	L80I (116)	DUF1093 domain-containing protein
3528224	3528224	G	T	45	1	49822-1		Fructose-1,6-bisphosphatase, Bacillus type (EC 3.1.3.11)
3528224	3528224	G	T	51	1	49822-2
3540157	3540157	C	T	56	0.89	49822-1	E357K (608)	DNA primase/helicase, phage-associated
3540157	3540157	C	T	48	0.96	49822-2
3545347	3545347	G	A	39	1	49822-1	E86K (301)	Type II restriction enzyme BglI (EC 3.1.21.4) (Endonuclease BglI) (R.BglI)
3545347	3545347	G	A	53	1	49822-2
3556660	3556660	G	A	37	1	49822-1	P39L (95)	FIG004131: Transcriptional regulator, ArsR family
3556660	3556660	G	A	52	1	49822-2
3560856	3560856	G	A	37	1	49822-1	premature stop (390/397)	hypothetical protein
3560856	3560856	G	A	39	1	49822-2
3569075	3569075	G	A	38	1	49822-1	premature stop (53/450)	hypothetical protein
3569075	3569075	G	A	45	1	49822-2
3574052	3574052	G	A	43	1	49822-1	synonymous	Adenylosuccinate synthetase (EC 6.3.4.4)
3574052	3574052	G	A	46	1	49822-2
3583434	3583434	G	A	40	0.97	49822-1	D151N (162)	spore coat protein
3583434	3583434	G	A	36	0.97	49822-2
3590723	3590723	G	A	39	1	49822-1	Synonymous	transcriptional regulator, GntR family
3590723	3590723	G	A	42	1	49822-2
3600975	3600975	G	A	41	1	49822-1	M316I (460)	Transcriptional regulator, GntR family / Aspartate aminotransferase (EC 2.6.1.1)
3600975	3600975	G	A	45	1	49822-2
3601458	3601458	G	A	29	1	49822-1		Intergenic
3601458	3601458	G	A	32	1	49822-2
3631218	3631218	C	T	47	1	49822-1	A273V (378)	DNA polymerase III beta subunit (EC 2.7.7.7)
3631218	3631218	C	T	54	1	49822-2
3668930	3668930	T	A	40	0.97	49822-1	F54Y (146)	DUF327 domain-containing protein
3668930	3668930	T	A	45	1	49822-2
3701548	3701548	G	A	43	1	49822-1	D801N (832)	Stage II sporulation serine phosphatase for sigma-F activation (SpoIIE)
3701548	3701548	G	A	39	1	49822-2
3713697	3713697	C	T	42	1	49822-1	H62Y (280)	Aminodeoxychorismate lyase (EC 4.1.3.38)
3713697	3713697	C	T	41	1	49822-2
3746231	3746231	C	T	34	1	49822-1	H435Y (1199)	DNA-directed RNA polymerase beta subunit (EC 2.7.7.6)
3746247	3746247	C	T	34	1	49822-1	S440L (1199)	DNA-directed RNA polymerase beta subunit (EC 2.7.7.6)
3746247	3746247	C	T	48	1	49822-2
3750674	3750674	T	C	52	1	49822-2	M190T (1199)	DNA-directed RNA polymerase beta' subunit (EC 2.7.7.6)
3821406	3821406	C	T	47	1	49822-1		NADH dehydrogenase, subunit 5
3821406	3821406	C	T	41	1	49822-2
3852676	3852676	C	T	30	0.97	49822-1	Synonymous	Glycerophosphoryl diester phosphodiesterase, periplasmic (EC 3.1.4.46)
3852676	3852676	C	T	41	0.98	49822-2
3859655	3859655	C	T	22	1	49822-1	Synonymous	CDP-glycerol:poly(glycerophosphate) glycerophosphotransferase (EC 2.7.8.12)
3859655	3859655	C	T	45	0.98	49822-2
3880949	3880949	G	T	41	1	49822-1		cell wall-associated protein precursor (CWBP23, CWBP52)( EC:3.4.21.- )
3880949	3880949	G	T	36	1	49822-2
4008729	4008729	G	T	36	1	49822-1	Synonymous	D-arabino-3-hexulose 6-phosphate formaldehyde lyase
4008729	4008729	G	T	38	0.95	49822-2
4037872	4037872	G	A	41	1	49822-1	A52V (307)	Permease of the drug/metabolite transporter (DMT) superfamily
4037872	4037872	G	A	44	1	49822-2
4103148	4103148	C	T	26	1	49822-1	A303V (695)	Mannitol operon activator, BglG family
4103148	4103148	C	T	40	1	49822-2
4117558	4117558	C	T	39	1	49822-1	P9L (574), possible signal peptide	hypothetical protein
4117558	4117558	C	T	44	1	49822-2
4119671	4119671	A	G	25	1	49822-1	Y110C (398)	glycosyl transferase, group 2 family protein
4119671	4119671	A	G	41	1	49822-2
Grey = also called when 454 Datasetfrom 1942 strain is mapped to finished 1942 sequence

## Sheet: 49822_AllHCDiffs
Start	End	Ref	Var	Total	Var
Pos	Pos	Nuc	Nuc	Depth	Freq	Strain ID
734	734	G	A	27	1	49822-1
39905	39905	G	T	46	1	49822-1
39912	39912	G	T	47	1	49822-1
133080	133080	G	A	40	1	49822-1
313146	313146	C	T	25	1	49822-1
452636	452636	G	A	28	1	49822-1
611822	611822	G	T	28	1	49822-1
664239	664239	G	A	26	1	49822-1
889607	889607	A	G	38	1	49822-1
903504	903504	C	T	35	1	49822-1
1050842	1050842	G	A	37	1	49822-1
1170114	1170114	C	A	24	1	49822-1
1251549	1251549	C	A	29	1	49822-1
1506272	1506272	G	A	33	1	49822-1
1713595	1713595	A	G	23	1	49822-1
1923767	1923767	C	T	22	1	49822-1
2174033	2174033	G	T	25	1	49822-1
2286042	2286042	C	T	41	1	49822-1
2479676	2479676	C	T	31	1	49822-1
2602261	2602261	A	C	57	1	49822-1
2771980	2771980	C	A	38	1	49822-1
2939936	2939936	C	T	29	1	49822-1
2942772	2942781	TTTTGTTTTT	-	30	1	49822-1
3052835	3052835	G	T	31	1	49822-1
3113349	3113349	C	T	33	1	49822-1
3143172	3143172	G	A	40	1	49822-1
3159920	3159920	G	A	40	1	49822-1
3186184	3186184	C	T	38	1	49822-1
3188440	3188440	T	G	40	1	49822-1
3243343	3243343	G	A	41	1	49822-1
3268543	3268543	C	T	32	1	49822-1
3269962	3269962	C	A	34	1	49822-1
3279617	3279617	C	T	43	1	49822-1
3308494	3308494	C	T	39	1	49822-1
3436664	3436664	G	A	29	1	49822-1
3437350	3437350	T	C	28	1	49822-1
3447958	3447958	G	A	37	1	49822-1
3456800	3456800	G	A	36	1	49822-1
3528224	3528224	G	T	45	1	49822-1
3545347	3545347	G	A	39	1	49822-1
3556660	3556660	G	A	37	1	49822-1
3560856	3560856	G	A	37	1	49822-1
3569075	3569075	G	A	38	1	49822-1
3574052	3574052	G	A	43	1	49822-1
3590723	3590723	G	A	39	1	49822-1
3600975	3600975	G	A	41	1	49822-1
3601458	3601458	G	A	29	1	49822-1
3631218	3631218	C	T	47	1	49822-1
3701548	3701548	G	A	43	1	49822-1
3713697	3713697	C	T	42	1	49822-1
3746231	3746231	C	T	34	1	49822-1
3746247	3746247	C	T	34	1	49822-1
3821406	3821406	C	T	47	1	49822-1
3859655	3859655	C	T	22	1	49822-1
3880949	3880949	G	T	41	1	49822-1
4008729	4008729	G	T	36	1	49822-1
4037872	4037872	G	A	41	1	49822-1
4103148	4103148	C	T	26	1	49822-1
4117558	4117558	C	T	39	1	49822-1
4119671	4119671	A	G	25	1	49822-1
45501	45501	C	A	35	0.97	49822-1
61413	61413	C	A	34	0.97	49822-1
686460	686460	T	G	32	0.97	49822-1
1504763	1504764	GA	-	30	0.97	49822-1
3583434	3583434	G	A	40	0.97	49822-1
3668930	3668930	T	A	40	0.97	49822-1
3852676	3852676	C	T	30	0.97	49822-1
3128882	3128882	A	-	23	0.96	49822-1
1423599	1423599	T	C	20	0.95	49822-1
2073603	2073603	A	G	21	0.95	49822-1
3540157	3540157	C	T	56	0.89	49822-1
3354410	3354410	C	A	33	0.88	49822-1
292721	292721	G	T	7	0.57	49822-1
2602084	2602086	CTT	TTC	46	0.54	49822-1
2602090	2602090	A	T	47	0.53	49822-1
2602379	2602379	T	C	68	0.53	49822-1
2602397	2602397	G	A	68	0.53	49822-1
2602175	2602175	C	T	46	0.52	49822-1
3128890	3128890	T	C	27	0.52	49822-1
2602180	2602181	TA	-	45	0.51	49822-1
292715	292715	A	C	8	0.5	49822-1
292852	292852	C	T	6	0.5	49822-1
293756	293756	A	C	6	0.5	49822-1
2602694	2602706	TACAAAACATTAT	AAAAACAA	55	0.49	49822-1
2602710	2602717	TATCCAAG	AA	56	0.48	49822-1
3719096	3719096	C	T	64	0.48	49822-1
2032958	2032959	CG	-	27	0.44	49822-1
292703	292703	A	C	7	0.43	49822-1
292706	292706	T	A	7	0.43	49822-1
292712	292712	C	T	7	0.43	49822-1
292859	292859	T	A	7	0.43	49822-1
292861	292861	C	T	7	0.43	49822-1
292870	292870	A	T	7	0.43	49822-1
292878	292878	T	C	7	0.43	49822-1
292886	292886	A	T	7	0.43	49822-1
293747	293747	A	T	7	0.43	49822-1
4131367	4131367	G	C	24	0.42	49822-1
4131363	4131363	T	C	23	0.39	49822-1
4131360	4131360	G	A	22	0.32	49822-1
3128939	3128939	-	A	24	0.29	49822-1
209754	209756	TTA	-	26	0.27	49822-1
3128871	3128871	T	C	30	0.27	49822-1
2700388	2700390	TGT	G	36	0.25	49822-1
3116511	3116512	CT	-	28	0.25	49822-1
2825574	2825576	TAT	A	45	0.24	49822-1
3128853	3128853	C	T	33	0.24	49822-1
1743312	1743313	GA	-	32	0.22	49822-1
2416002	2416004	ATA	T	24	0.21	49822-1
891162	891164	AGA	G	25	0.2	49822-1
4070691	4070693	TGT	G	25	0.2	49822-1
2362181	2362183	ATA	T	31	0.19	49822-1
2854573	2854575	TAT	A	32	0.19	49822-1
3128949	3128955	TAAAAAA	AAAAAG	21	0.19	49822-1
4131420	4131420	A	G	24	0.17	49822-1
4131423	4131423	T	C	24	0.17	49822-1
999089	999091	TCA	C	25	0.16	49822-1
3911131	3911133	ACA	C	44	0.16	49822-1
397431	397433	TAT	A	27	0.15	49822-1
3128960	3128960	T	A	20	0.15	49822-1
760704	760706	ACA	C	37	0.14	49822-1
3029319	3029321	TGT	G	28	0.14	49822-1
3675717	3675719	ACA	C	36	0.14	49822-1
4131336	4131336	C	T	21	0.14	49822-1
937490	937491	TA	-	30	0.13	49822-1
2094424	2094426	TCT	C	30	0.13	49822-1
4048050	4048052	TGA	G	23	0.13	49822-1
12987	12989	AGA	G	41	0.12	49822-1
2021196	2021197	TA	-	25	0.12	49822-1
3914110	3914112	ATA	T	25	0.12	49822-1
4002326	4002327	AG	-	26	0.12	49822-1
1693947	1693948	AT	-	28	0.11	49822-1
2014221	2014222	TA	-	27	0.11	49822-1
2558542	2558547	TAAAAT	AAAA	37	0.11	49822-1
2916716	2916717	TC	-	27	0.11	49822-1
3008138	3008140	TGA	G	38	0.11	49822-1
1554647	1554653	CTTTTCA	TTTC	30	0.1	49822-1
734	734	G	A	44	1	49822-2
39905	39905	G	T	37	1	49822-2
39912	39912	G	T	39	1	49822-2
61413	61413	C	A	34	1	49822-2
133080	133080	G	A	40	1	49822-2
313146	313146	C	T	42	1	49822-2
452636	452636	G	A	47	1	49822-2
611822	611822	G	T	45	1	49822-2
664239	664239	G	A	36	1	49822-2
889607	889607	A	G	44	1	49822-2
903504	903504	C	T	41	1	49822-2
1050842	1050842	G	A	44	1	49822-2
1170114	1170114	C	A	30	1	49822-2
1251549	1251549	C	A	35	1	49822-2
1423599	1423599	T	C	40	1	49822-2
1506272	1506272	G	A	30	1	49822-2
1713595	1713595	A	G	39	1	49822-2
1923767	1923767	C	T	40	1	49822-2
2174033	2174033	G	T	46	1	49822-2
2286042	2286042	C	T	48	1	49822-2
2479676	2479676	C	T	29	1	49822-2
2771980	2771980	C	A	30	1	49822-2
2942772	2942781	TTTTGTTTTT	-	38	1	49822-2
3052835	3052835	G	T	31	1	49822-2
3113349	3113349	C	T	37	1	49822-2
3143172	3143172	G	A	36	1	49822-2
3159920	3159920	G	A	37	1	49822-2
3186184	3186184	C	T	36	1	49822-2
3188440	3188440	T	G	40	1	49822-2
3243343	3243343	G	A	41	1	49822-2
3268543	3268543	C	T	36	1	49822-2
3269962	3269962	C	A	29	1	49822-2
3279617	3279617	C	T	45	1	49822-2
3308494	3308494	C	T	42	1	49822-2
3437350	3437350	T	C	42	1	49822-2
3447958	3447958	G	A	50	1	49822-2
3456800	3456800	G	A	45	1	49822-2
3475542	3475542	G	T	25	1	49822-2
3528224	3528224	G	T	51	1	49822-2
3545347	3545347	G	A	53	1	49822-2
3556660	3556660	G	A	52	1	49822-2
3560856	3560856	G	A	39	1	49822-2
3569075	3569075	G	A	45	1	49822-2
3574052	3574052	G	A	46	1	49822-2
3590723	3590723	G	A	42	1	49822-2
3600975	3600975	G	A	45	1	49822-2
3601458	3601458	G	A	32	1	49822-2
3631218	3631218	C	T	54	1	49822-2
3668930	3668930	T	A	45	1	49822-2
3701548	3701548	G	A	39	1	49822-2
3713697	3713697	C	T	41	1	49822-2
3746247	3746247	C	T	48	1	49822-2
3750674	3750674	T	C	52	1	49822-2
3821406	3821406	C	T	41	1	49822-2
3880949	3880949	G	T	36	1	49822-2
4037872	4037872	G	A	44	1	49822-2
4103148	4103148	C	T	40	1	49822-2
4117558	4117558	C	T	44	1	49822-2
4119671	4119671	A	G	41	1	49822-2
2939936	2939936	C	T	45	0.98	49822-2
3852676	3852676	C	T	41	0.98	49822-2
3859655	3859655	C	T	45	0.98	49822-2
686460	686460	T	G	36	0.97	49822-2
3583434	3583434	G	A	36	0.97	49822-2
2602261	2602261	A	C	56	0.96	49822-2
3436664	3436664	G	A	46	0.96	49822-2
3540157	3540157	C	T	48	0.96	49822-2
4008729	4008729	G	T	38	0.95	49822-2
2565064	2565064	A	G	31	0.94	49822-2
2518047	2518047	T	C	29	0.93	49822-2
45501	45501	C	A	47	0.91	49822-2
2073603	2073603	A	G	24	0.87	49822-2
3354410	3354410	C	A	39	0.87	49822-2
3128882	3128882	A	-	32	0.84	49822-2
3128880	3128880	-	G	33	0.82	49822-2
294805	294805	A	C	5	0.8	49822-2
293426	293434	AGCAACTGG	-	4	0.75	49822-2
3128895	3128895	G	-	28	0.75	49822-2
3128890	3128890	T	C	30	0.7	49822-2
3719096	3719096	C	T	78	0.58	49822-2
4131363	4131363	T	C	33	0.55	49822-2
2602379	2602379	T	C	72	0.51	49822-2
2602084	2602086	CTT	TTC	62	0.5	49822-2
2602397	2602397	G	A	76	0.49	49822-2
2602090	2602090	A	T	64	0.48	49822-2
2602694	2602696	TAC	A	68	0.43	49822-2
4131360	4131360	G	A	31	0.42	49822-2
4131367	4131367	G	C	37	0.41	49822-2
295070	295070	A	C	15	0.4	49822-2
2602175	2602175	C	T	58	0.4	49822-2
2602180	2602181	TA	-	56	0.39	49822-2
292838	292838	A	T	8	0.37	49822-2
293094	293094	G	T	8	0.37	49822-2
2602710	2602714	TATCC	-	58	0.34	49822-2
293099	293099	T	G	9	0.33	49822-2
293500	293500	C	T	9	0.33	49822-2
295120	295120	A	T	12	0.33	49822-2
292721	292721	G	T	13	0.31	49822-2
295066	295066	C	A	13	0.31	49822-2
292715	292715	A	C	10	0.3	49822-2
292834	292834	C	T	10	0.3	49822-2
293102	293102	T	A	10	0.3	49822-2
293104	293104	T	C	10	0.3	49822-2
293113	293113	T	C	10	0.3	49822-2
291931	291933	TAT	A	49	0.29	49822-2
295132	295132	A	C	14	0.29	49822-2
3128949	3128949	T	C	18	0.28	49822-2
4131324	4131324	T	C	22	0.27	49822-2
4131327	4131327	T	C	22	0.27	49822-2
295123	295123	T	C	12	0.25	49822-2
2032958	2032959	CG	-	32	0.25	49822-2
292574	292574	G	A	21	0.24	49822-2
2049912	2049914	TCT	C	21	0.24	49822-2
4131322	4131322	A	G	21	0.24	49822-2
3551072	3551073	TA	-	26	0.23	49822-2
3919571	3919573	ACA	C	30	0.23	49822-2
4131336	4131336	C	T	23	0.22	49822-2
292582	292582	C	T	19	0.21	49822-2
295128	295128	G	T	14	0.21	49822-2
2065150	2065152	TCT	C	34	0.21	49822-2
2897303	2897305	TCT	C	29	0.21	49822-2
292580	292580	A	T	20	0.2	49822-2
3815944	3815944	-	A	45	0.2	49822-2
3559319	3559320	AC	-	37	0.19	49822-2
2011965	2011966	GA	-	28	0.18	49822-2
2131902	2131902	-	A	45	0.16	49822-2
3128880	3128881	TA	AT	32	0.16	49822-2
3128960	3128960	T	A	19	0.16	49822-2
3128968	3128968	C	T	20	0.15	49822-2
292544	292544	T	A	29	0.14	49822-2
2820989	2820991	ATA	T	35	0.14	49822-2
848736	848737	GT	-	30	0.13	49822-2
1891642	1891644	TCT	C	31	0.13	49822-2
3769628	3769628	-	GT	46	0.13	49822-2
4131420	4131420	A	G	39	0.13	49822-2
4131428	4131428	C	GA	39	0.13	49822-2
203961	203961	C	ACT	34	0.12	49822-2
720285	720287	TAT	A	41	0.12	49822-2
3128871	3128871	T	C	33	0.12	49822-2
3254017	3254019	TCT	C	34	0.12	49822-2
958027	958030	ACAA	C	38	0.11	49822-2
1698558	1698560	ATA	T	36	0.11	49822-2
2499924	2499925	TA	-	28	0.11	49822-2
4131423	4131423	T	C	38	0.11	49822-2
349750	349752	ATA	T	30	0.1	49822-2
997108	997109	TA	-	39	0.1	49822-2
1207720	1207722	AGA	G	30	0.1	49822-2
1368910	1368912	ATA	T	29	0.1	49822-2

## Sheet: Sheet2
734	734	G	A	27	1	49822-1
734	734	G	A	44	1	49822-2
39905	39905	G	T	46	1	49822-1
39905	39905	G	T	37	1	49822-2
39912	39912	G	T	47	1	49822-1
39912	39912	G	T	39	1	49822-2
45501	45501	C	A	35	0.97	49822-1
45501	45501	C	A	47	0.91	49822-2
61413	61413	C	A	34	0.97	49822-1
61413	61413	C	A	34	1	49822-2
133080	133080	G	A	40	1	49822-1
133080	133080	G	A	40	1	49822-2
313146	313146	C	T	25	1	49822-1
313146	313146	C	T	42	1	49822-2
452636	452636	G	A	28	1	49822-1
452636	452636	G	A	47	1	49822-2
611822	611822	G	T	28	1	49822-1
611822	611822	G	T	45	1	49822-2
664239	664239	G	A	26	1	49822-1
664239	664239	G	A	36	1	49822-2
686460	686460	T	G	32	0.97	49822-1
686460	686460	T	G	36	0.97	49822-2
889607	889607	A	G	38	1	49822-1
889607	889607	A	G	44	1	49822-2
903504	903504	C	T	35	1	49822-1
903504	903504	C	T	41	1	49822-2
1050842	1050842	G	A	37	1	49822-1
1050842	1050842	G	A	44	1	49822-2
1170114	1170114	C	A	24	1	49822-1
1170114	1170114	C	A	30	1	49822-2
1251549	1251549	C	A	29	1	49822-1
1251549	1251549	C	A	35	1	49822-2
1423599	1423599	T	C	20	0.95	49822-1
1423599	1423599	T	C	40	1	49822-2
1504763	1504764	GA	-	30	0.97	49822-1
1506272	1506272	G	A	33	1	49822-1
1506272	1506272	G	A	30	1	49822-2
1713595	1713595	A	G	23	1	49822-1
1713595	1713595	A	G	39	1	49822-2
1923767	1923767	C	T	22	1	49822-1
1923767	1923767	C	T	40	1	49822-2
2073603	2073603	A	G	21	0.95	49822-1
2073603	2073603	A	G	24	0.87	49822-2
2174033	2174033	G	T	25	1	49822-1
2174033	2174033	G	T	46	1	49822-2
2286042	2286042	C	T	41	1	49822-1
2286042	2286042	C	T	48	1	49822-2
2479676	2479676	C	T	31	1	49822-1
2479676	2479676	C	T	29	1	49822-2
2518047	2518047	T	C	29	0.93	49822-2
2565064	2565064	A	G	31	0.94	49822-2
2602261	2602261	A	C	57	1	49822-1
2602261	2602261	A	C	56	0.96	49822-2
2771980	2771980	C	A	38	1	49822-1
2771980	2771980	C	A	30	1	49822-2
2939936	2939936	C	T	29	1	49822-1
2939936	2939936	C	T	45	0.98	49822-2
2942772	2942781	TTTTGTTTTT	-	30	1	49822-1
2942772	2942781	TTTTGTTTTT	-	38	1	49822-2
3052835	3052835	G	T	31	1	49822-1
3052835	3052835	G	T	31	1	49822-2
3113349	3113349	C	T	33	1	49822-1
3113349	3113349	C	T	37	1	49822-2
3128882	3128882	A	-	23	0.96	49822-1
3143172	3143172	G	A	40	1	49822-1
3143172	3143172	G	A	36	1	49822-2
3159920	3159920	G	A	40	1	49822-1
3159920	3159920	G	A	37	1	49822-2
3186184	3186184	C	T	38	1	49822-1
3186184	3186184	C	T	36	1	49822-2
3188440	3188440	T	G	40	1	49822-1
3188440	3188440	T	G	40	1	49822-2
292721	292721	G	T	7	0.57	49822-1
2602084	2602086	CTT	TTC	46	0.54	49822-1
2602090	2602090	A	T	47	0.53	49822-1
2602379	2602379	T	C	68	0.53	49822-1
2602397	2602397	G	A	68	0.53	49822-1
2602175	2602175	C	T	46	0.52	49822-1
3128890	3128890	T	C	27	0.52	49822-1
2602180	2602181	TA	-	45	0.51	49822-1
292715	292715	A	C	8	0.5	49822-1
292852	292852	C	T	6	0.5	49822-1
293756	293756	A	C	6	0.5	49822-1
2602694	2602706	TACAAAACATTAT	AAAAACAA	55	0.49	49822-1
2602710	2602717	TATCCAAG	AA	56	0.48	49822-1
3719096	3719096	C	T	64	0.48	49822-1
2032958	2032959	CG	-	27	0.44	49822-1
292703	292703	A	C	7	0.43	49822-1
292706	292706	T	A	7	0.43	49822-1
292712	292712	C	T	7	0.43	49822-1
292859	292859	T	A	7	0.43	49822-1
292861	292861	C	T	7	0.43	49822-1
292870	292870	A	T	7	0.43	49822-1
292878	292878	T	C	7	0.43	49822-1
292886	292886	A	T	7	0.43	49822-1
293747	293747	A	T	7	0.43	49822-1
4131367	4131367	G	C	24	0.42	49822-1
4131363	4131363	T	C	23	0.39	49822-1
4131360	4131360	G	A	22	0.32	49822-1
3128939	3128939	-	A	24	0.29	49822-1
209754	209756	TTA	-	26	0.27	49822-1
3128871	3128871	T	C	30	0.27	49822-1
2700388	2700390	TGT	G	36	0.25	49822-1
3116511	3116512	CT	-	28	0.25	49822-1
2825574	2825576	TAT	A	45	0.24	49822-1
3128853	3128853	C	T	33	0.24	49822-1
1743312	1743313	GA	-	32	0.22	49822-1
2416002	2416004	ATA	T	24	0.21	49822-1
891162	891164	AGA	G	25	0.2	49822-1
4070691	4070693	TGT	G	25	0.2	49822-1
2362181	2362183	ATA	T	31	0.19	49822-1
2854573	2854575	TAT	A	32	0.19	49822-1
3128949	3128955	TAAAAAA	AAAAAG	21	0.19	49822-1
4131420	4131420	A	G	24	0.17	49822-1
4131423	4131423	T	C	24	0.17	49822-1
999089	999091	TCA	C	25	0.16	49822-1
3911131	3911133	ACA	C	44	0.16	49822-1
397431	397433	TAT	A	27	0.15	49822-1
3128960	3128960	T	A	20	0.15	49822-1
760704	760706	ACA	C	37	0.14	49822-1
3029319	3029321	TGT	G	28	0.14	49822-1
3675717	3675719	ACA	C	36	0.14	49822-1
4131336	4131336	C	T	21	0.14	49822-1
937490	937491	TA	-	30	0.13	49822-1
2094424	2094426	TCT	C	30	0.13	49822-1
4048050	4048052	TGA	G	23	0.13	49822-1
12987	12989	AGA	G	41	0.12	49822-1
2021196	2021197	TA	-	25	0.12	49822-1
3914110	3914112	ATA	T	25	0.12	49822-1
4002326	4002327	AG	-	26	0.12	49822-1
1693947	1693948	AT	-	28	0.11	49822-1
2014221	2014222	TA	-	27	0.11	49822-1
2558542	2558547	TAAAAT	AAAA	37	0.11	49822-1
2916716	2916717	TC	-	27	0.11	49822-1
3008138	3008140	TGA	G	38	0.11	49822-1
1554647	1554653	CTTTTCA	TTTC	30	0.1	49822-1
3243343	3243343	G	A	41	1	49822-1
3243343	3243343	G	A	41	1	49822-2
3268543	3268543	C	T	32	1	49822-1
3268543	3268543	C	T	36	1	49822-2
3269962	3269962	C	A	34	1	49822-1
3269962	3269962	C	A	29	1	49822-2
3279617	3279617	C	T	43	1	49822-1
3279617	3279617	C	T	45	1	49822-2
3308494	3308494	C	T	39	1	49822-1
3308494	3308494	C	T	42	1	49822-2
3354410	3354410	C	A	33	0.88	49822-1
3354410	3354410	C	A	39	0.87	49822-2
3436664	3436664	G	A	29	1	49822-1
3436664	3436664	G	A	46	0.96	49822-2
3437350	3437350	T	C	28	1	49822-1
3437350	3437350	T	C	42	1	49822-2
3447958	3447958	G	A	37	1	49822-1
3447958	3447958	G	A	50	1	49822-2
3456800	3456800	G	A	36	1	49822-1
3456800	3456800	G	A	45	1	49822-2
3475542	3475542	G	T	25	1	49822-2
3528224	3528224	G	T	45	1	49822-1
3528224	3528224	G	T	51	1	49822-2
3540157	3540157	C	T	56	0.89	49822-1
3540157	3540157	C	T	48	0.96	49822-2
3545347	3545347	G	A	39	1	49822-1
3545347	3545347	G	A	53	1	49822-2
3556660	3556660	G	A	37	1	49822-1
3556660	3556660	G	A	52	1	49822-2
3560856	3560856	G	A	37	1	49822-1
3560856	3560856	G	A	39	1	49822-2
3569075	3569075	G	A	38	1	49822-1
3569075	3569075	G	A	45	1	49822-2
3574052	3574052	G	A	43	1	49822-1
3574052	3574052	G	A	46	1	49822-2
3583434	3583434	G	A	40	0.97	49822-1
3583434	3583434	G	A	36	0.97	49822-2
3590723	3590723	G	A	39	1	49822-1
3590723	3590723	G	A	42	1	49822-2
3600975	3600975	G	A	41	1	49822-1
3600975	3600975	G	A	45	1	49822-2
3601458	3601458	G	A	29	1	49822-1
3601458	3601458	G	A	32	1	49822-2
3631218	3631218	C	T	47	1	49822-1
3631218	3631218	C	T	54	1	49822-2
3668930	3668930	T	A	40	0.97	49822-1
3668930	3668930	T	A	45	1	49822-2
3701548	3701548	G	A	43	1	49822-1
3701548	3701548	G	A	39	1	49822-2
3713697	3713697	C	T	42	1	49822-1
3713697	3713697	C	T	41	1	49822-2
3746231	3746231	C	T	34	1	49822-1
3746247	3746247	C	T	34	1	49822-1
3746247	3746247	C	T	48	1	49822-2
3750674	3750674	T	C	52	1	49822-2
3821406	3821406	C	T	47	1	49822-1
3821406	3821406	C	T	41	1	49822-2
3852676	3852676	C	T	30	0.97	49822-1
3852676	3852676	C	T	41	0.98	49822-2
3859655	3859655	C	T	22	1	49822-1
3859655	3859655	C	T	45	0.98	49822-2
3880949	3880949	G	T	41	1	49822-1
3880949	3880949	G	T	36	1	49822-2
4008729	4008729	G	T	36	1	49822-1
4008729	4008729	G	T	38	0.95	49822-2
4037872	4037872	G	A	41	1	49822-1
4037872	4037872	G	A	44	1	49822-2
4103148	4103148	C	T	26	1	49822-1
4103148	4103148	C	T	40	1	49822-2
4117558	4117558	C	T	39	1	49822-1
4117558	4117558	C	T	44	1	49822-2
4119671	4119671	A	G	25	1	49822-1
4119671	4119671	A	G	41	1	49822-2
3128882	3128882	A	-	32	0.84	49822-2
3128880	3128880	-	G	33	0.82	49822-2
294805	294805	A	C	5	0.8	49822-2
293426	293434	AGCAACTGG	-	4	0.75	49822-2
3128895	3128895	G	-	28	0.75	49822-2
3128890	3128890	T	C	30	0.7	49822-2
3719096	3719096	C	T	78	0.58	49822-2
4131363	4131363	T	C	33	0.55	49822-2
2602379	2602379	T	C	72	0.51	49822-2
2602084	2602086	CTT	TTC	62	0.5	49822-2
2602397	2602397	G	A	76	0.49	49822-2
2602090	2602090	A	T	64	0.48	49822-2
2602694	2602696	TAC	A	68	0.43	49822-2
4131360	4131360	G	A	31	0.42	49822-2
4131367	4131367	G	C	37	0.41	49822-2
295070	295070	A	C	15	0.4	49822-2
2602175	2602175	C	T	58	0.4	49822-2
2602180	2602181	TA	-	56	0.39	49822-2
292838	292838	A	T	8	0.37	49822-2
293094	293094	G	T	8	0.37	49822-2
2602710	2602714	TATCC	-	58	0.34	49822-2
293099	293099	T	G	9	0.33	49822-2
293500	293500	C	T	9	0.33	49822-2
295120	295120	A	T	12	0.33	49822-2
292721	292721	G	T	13	0.31	49822-2
295066	295066	C	A	13	0.31	49822-2
292715	292715	A	C	10	0.3	49822-2
292834	292834	C	T	10	0.3	49822-2
293102	293102	T	A	10	0.3	49822-2
293104	293104	T	C	10	0.3	49822-2
293113	293113	T	C	10	0.3	49822-2
291931	291933	TAT	A	49	0.29	49822-2
295132	295132	A	C	14	0.29	49822-2
3128949	3128949	T	C	18	0.28	49822-2
4131324	4131324	T	C	22	0.27	49822-2
4131327	4131327	T	C	22	0.27	49822-2
295123	295123	T	C	12	0.25	49822-2
2032958	2032959	CG	-	32	0.25	49822-2
292574	292574	G	A	21	0.24	49822-2
2049912	2049914	TCT	C	21	0.24	49822-2
4131322	4131322	A	G	21	0.24	49822-2
3551072	3551073	TA	-	26	0.23	49822-2
3919571	3919573	ACA	C	30	0.23	49822-2
4131336	4131336	C	T	23	0.22	49822-2
292582	292582	C	T	19	0.21	49822-2
295128	295128	G	T	14	0.21	49822-2
2065150	2065152	TCT	C	34	0.21	49822-2
2897303	2897305	TCT	C	29	0.21	49822-2
292580	292580	A	T	20	0.2	49822-2
3815944	3815944	-	A	45	0.2	49822-2
3559319	3559320	AC	-	37	0.19	49822-2
2011965	2011966	GA	-	28	0.18	49822-2
2131902	2131902	-	A	45	0.16	49822-2
3128880	3128881	TA	AT	32	0.16	49822-2
3128960	3128960	T	A	19	0.16	49822-2
3128968	3128968	C	T	20	0.15	49822-2
292544	292544	T	A	29	0.14	49822-2
2820989	2820991	ATA	T	35	0.14	49822-2
848736	848737	GT	-	30	0.13	49822-2
1891642	1891644	TCT	C	31	0.13	49822-2
3769628	3769628	-	GT	46	0.13	49822-2
4131420	4131420	A	G	39	0.13	49822-2
4131428	4131428	C	GA	39	0.13	49822-2
203961	203961	C	ACT	34	0.12	49822-2
720285	720287	TAT	A	41	0.12	49822-2
3128871	3128871	T	C	33	0.12	49822-2
3254017	3254019	TCT	C	34	0.12	49822-2
958027	958030	ACAA	C	38	0.11	49822-2
1698558	1698560	ATA	T	36	0.11	49822-2
2499924	2499925	TA	-	28	0.11	49822-2
4131423	4131423	T	C	38	0.11	49822-2
349750	349752	ATA	T	30	0.1	49822-2
997108	997109	TA	-	39	0.1	49822-2
1207720	1207722	AGA	G	30	0.1	49822-2
1368910	1368912	ATA	T	29	0.1	49822-2
